# Supplementary material for: High-throughput screening and chemotype-enrichment analysis of ToxCast phase II chemicals evaluated for human sodium-iodide symporter (NIS) inhibition
Source: PubMed Central journal article supplement — Environ Int. Author manuscript; Available in PMC 2022 May 9. (PMC9082575; doi:10.1016/j.envint.2019.02.024), 2019-02-28

1. SPID: TP0001687G05  
NAME: Phenolphthalein  
CAS NO: 77-09-8

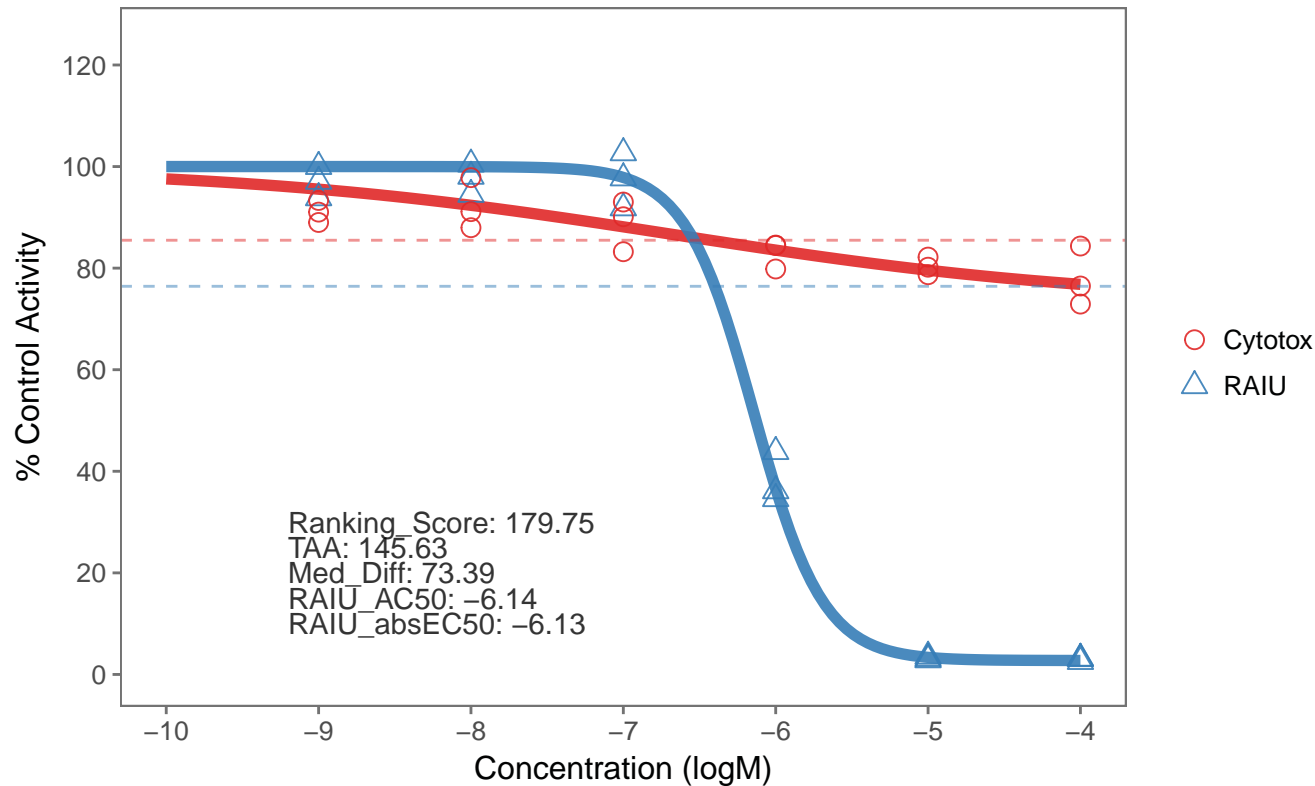

2. SPID: TP0001679E08  
NAME: PFHS-K  
CAS NO: 3871-99-6

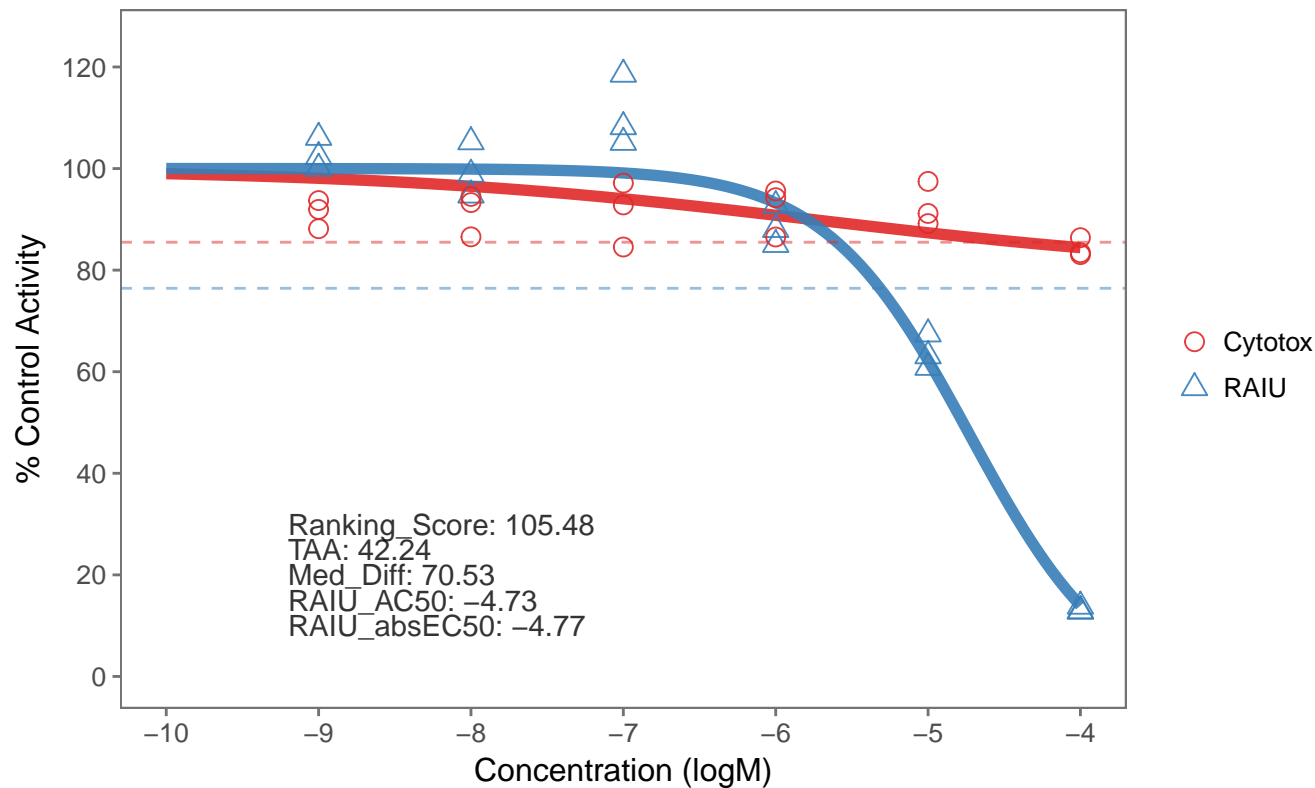

3. SPID: TP0001683C07  
NAME: PFOS  
CAS NO: 1763-23-1

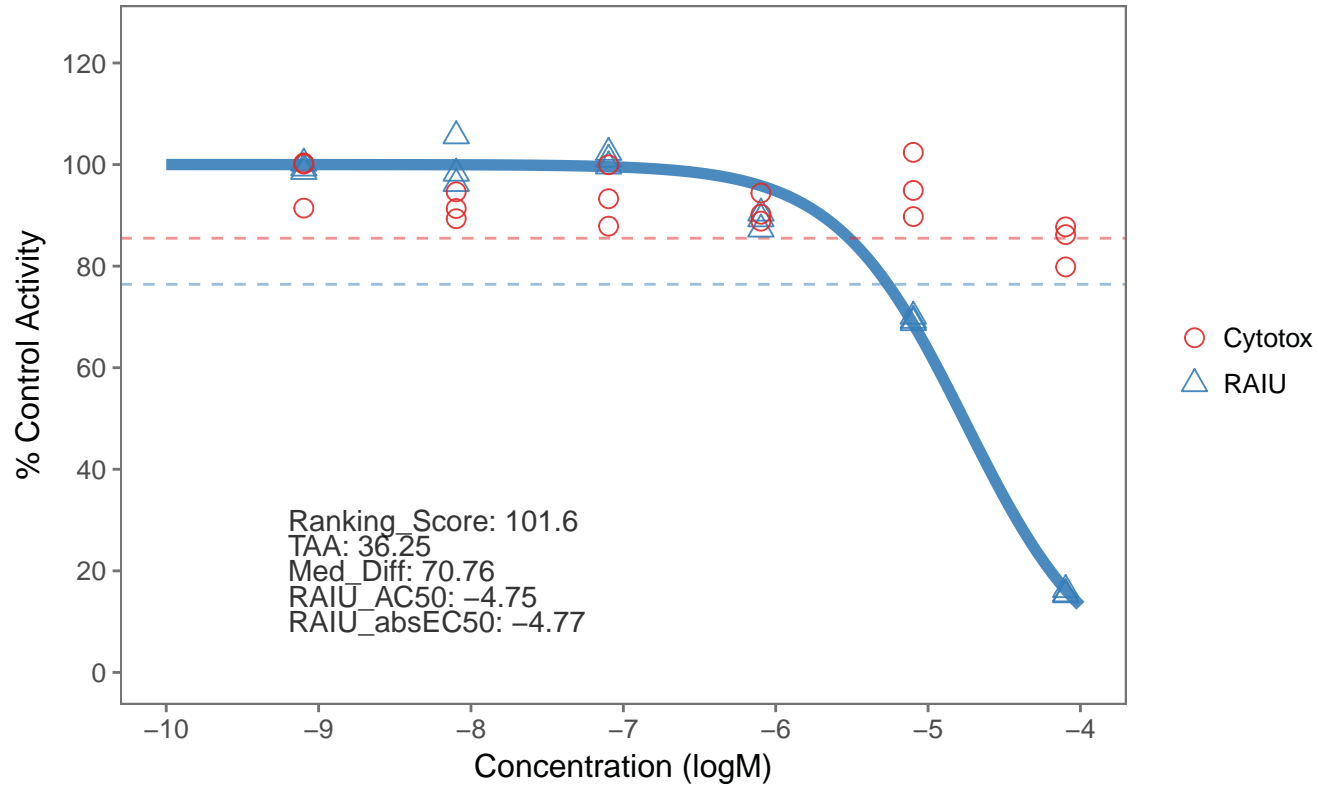

4. SPID: TP0001687E08  
NAME: Benz(a)anthracene  
CAS NO: 56-55-3

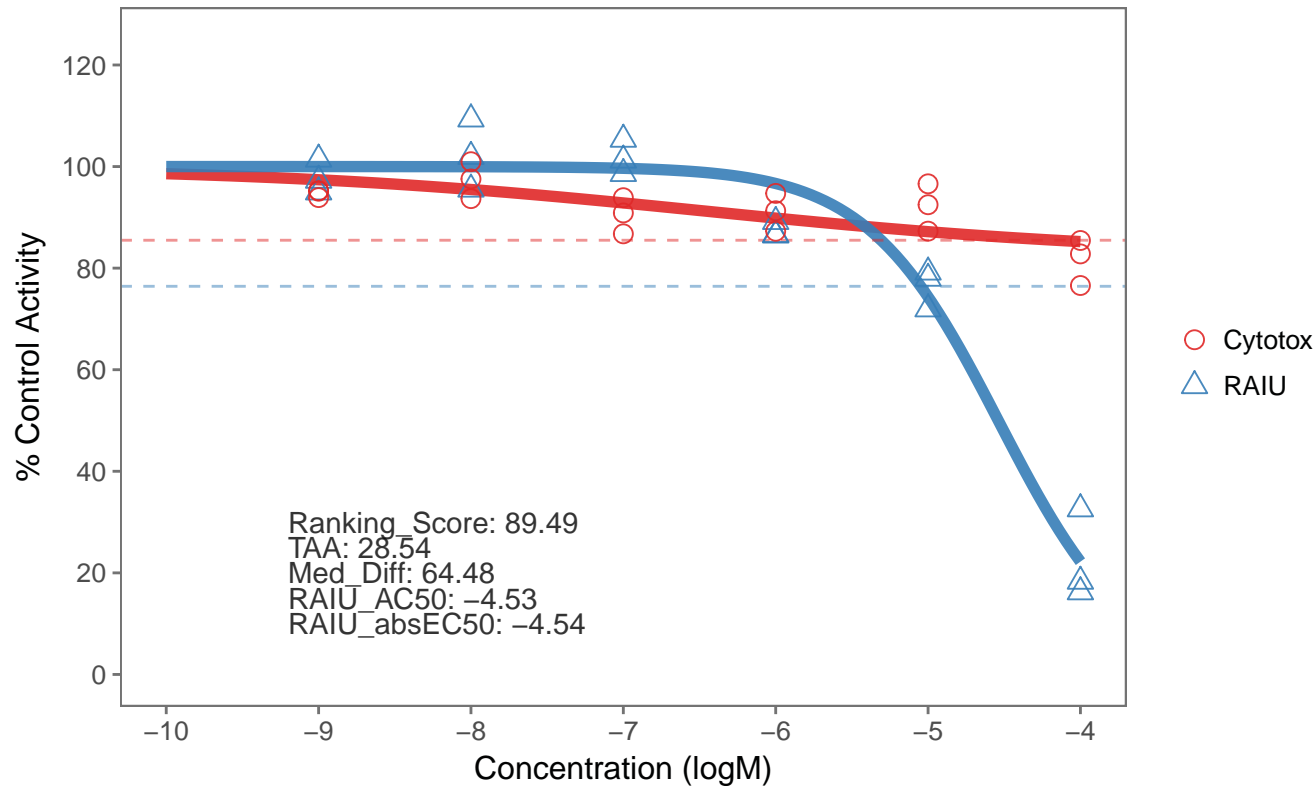

5. SPID: TP0001679D10  
NAME: PFOS-K  
CAS NO: 2795-39-3

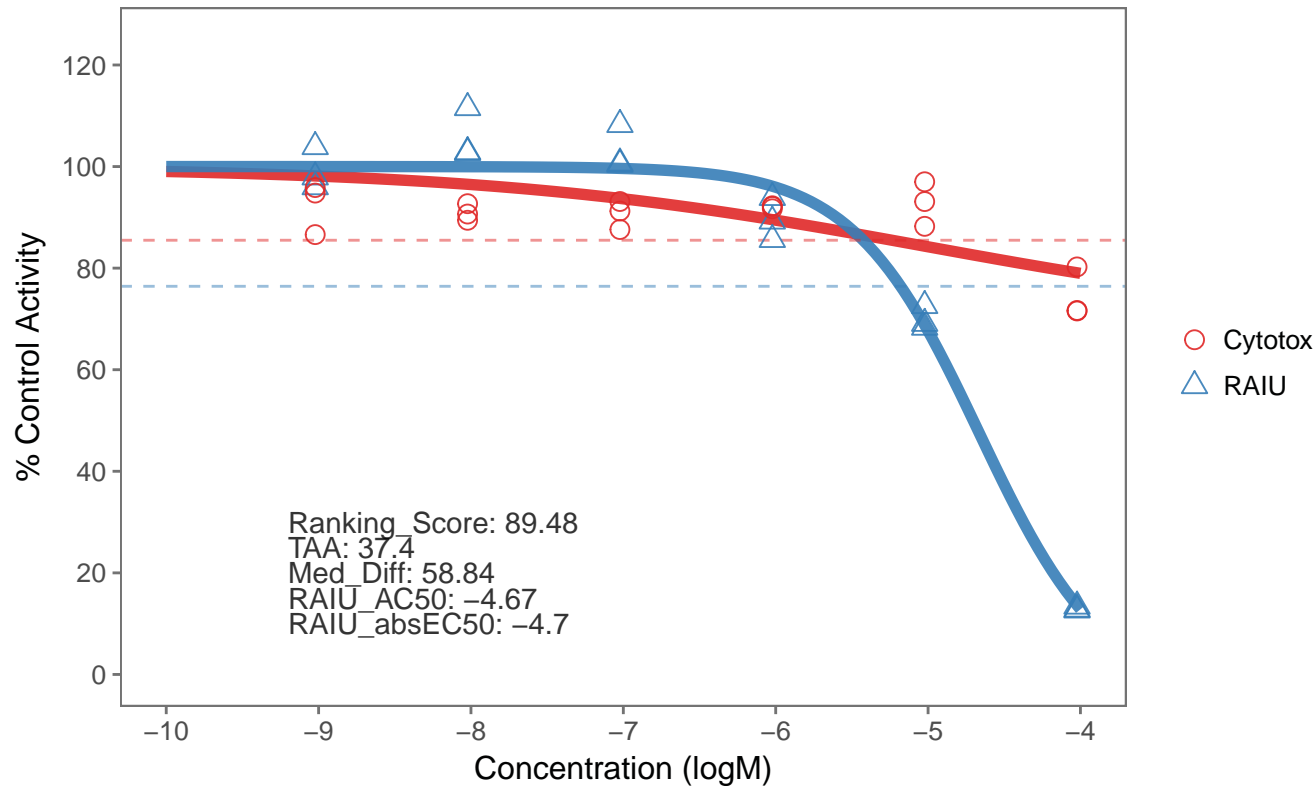

6. SPID: TP0001685H12  
NAME: Nitrofen  
CAS NO: 1836-75-5

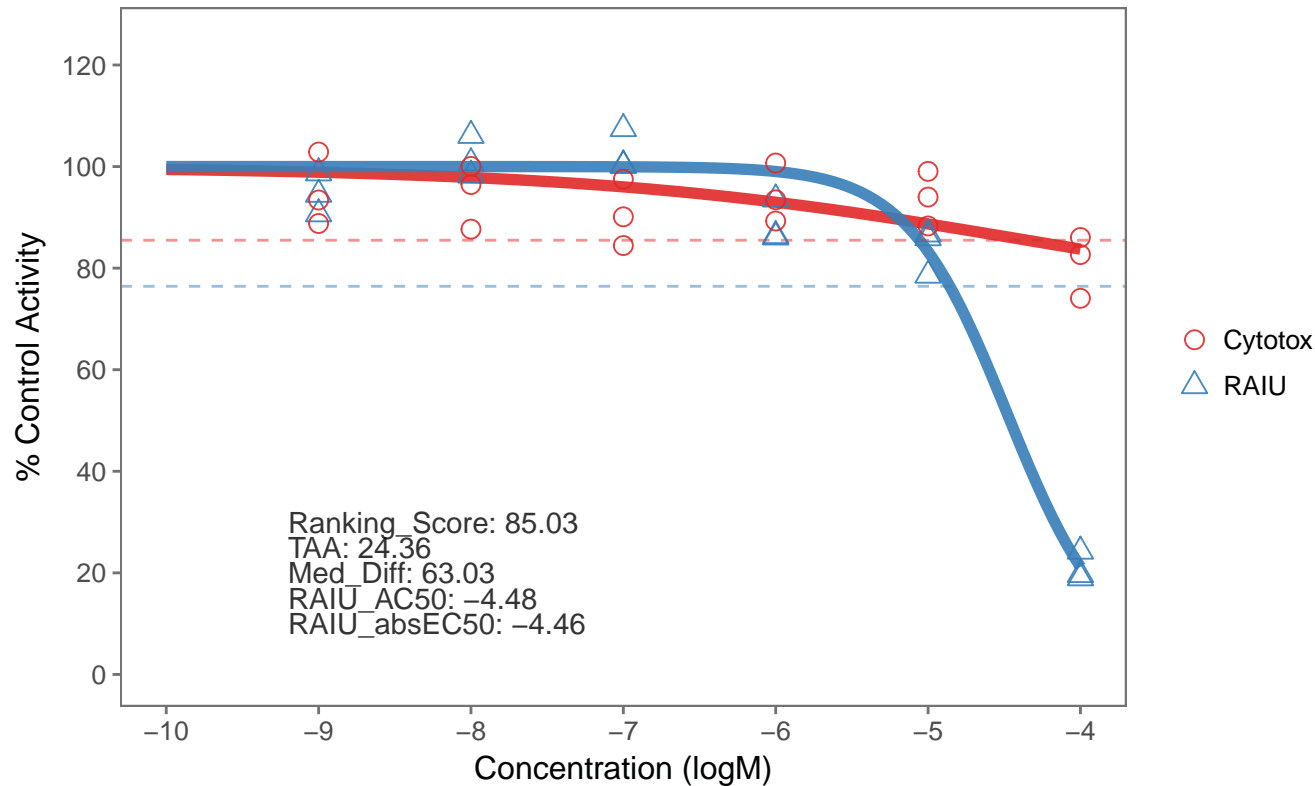

7. SPID: TP0001689C04  
NAME: Dinoseb  
CAS NO: 88-85-7

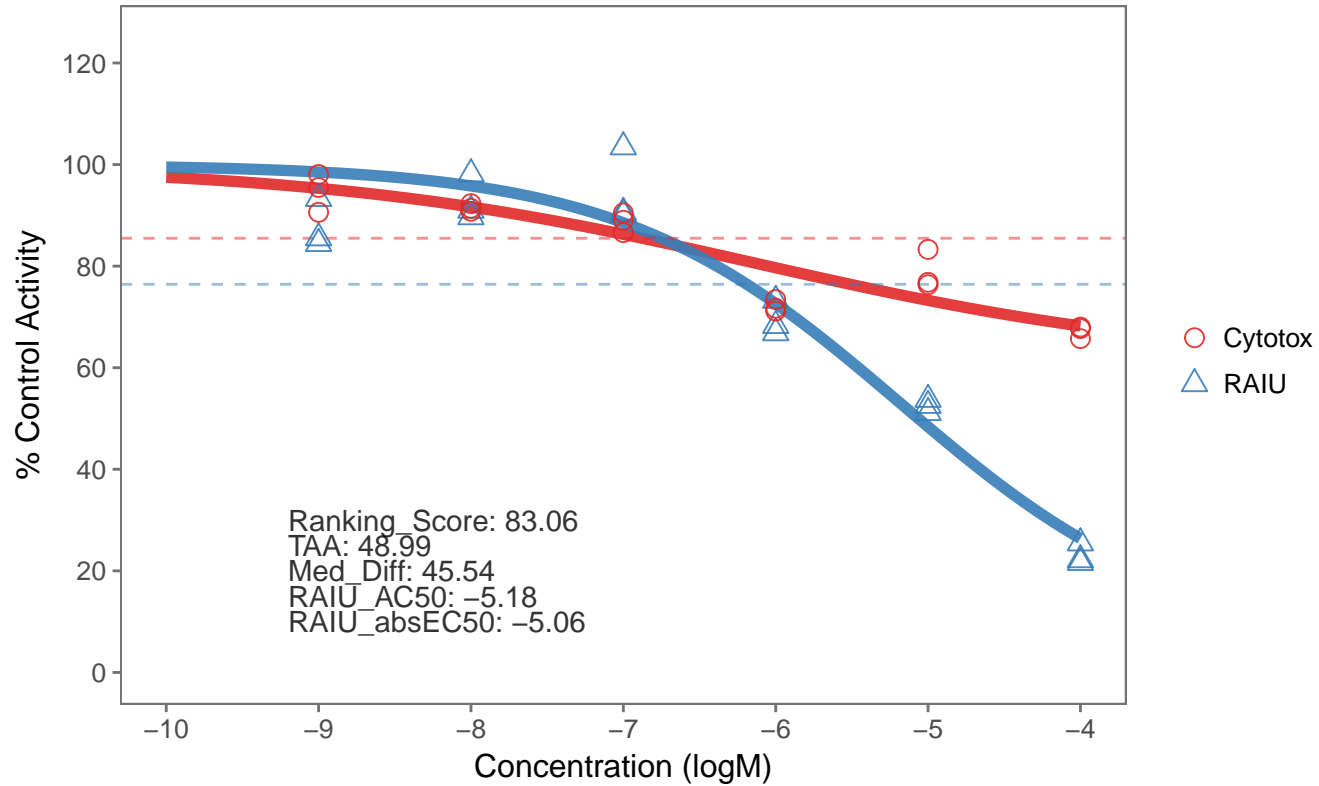

8. SPID: TP0001683G04  
NAME: Tributyltin chloride  
CAS NO: 1461-22-9

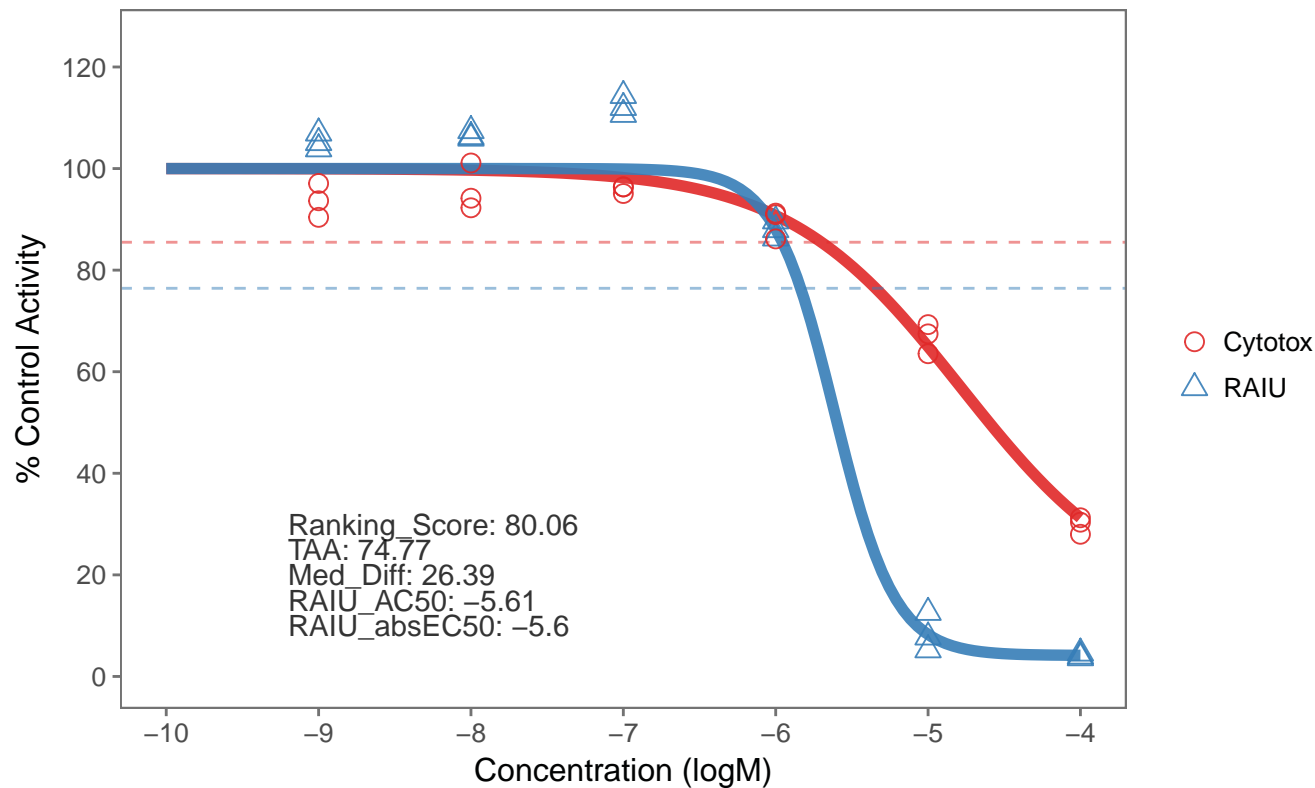



9. SPID: TP0001685B04  
NAME: Triclocarban  
CAS NO: 101-20-2

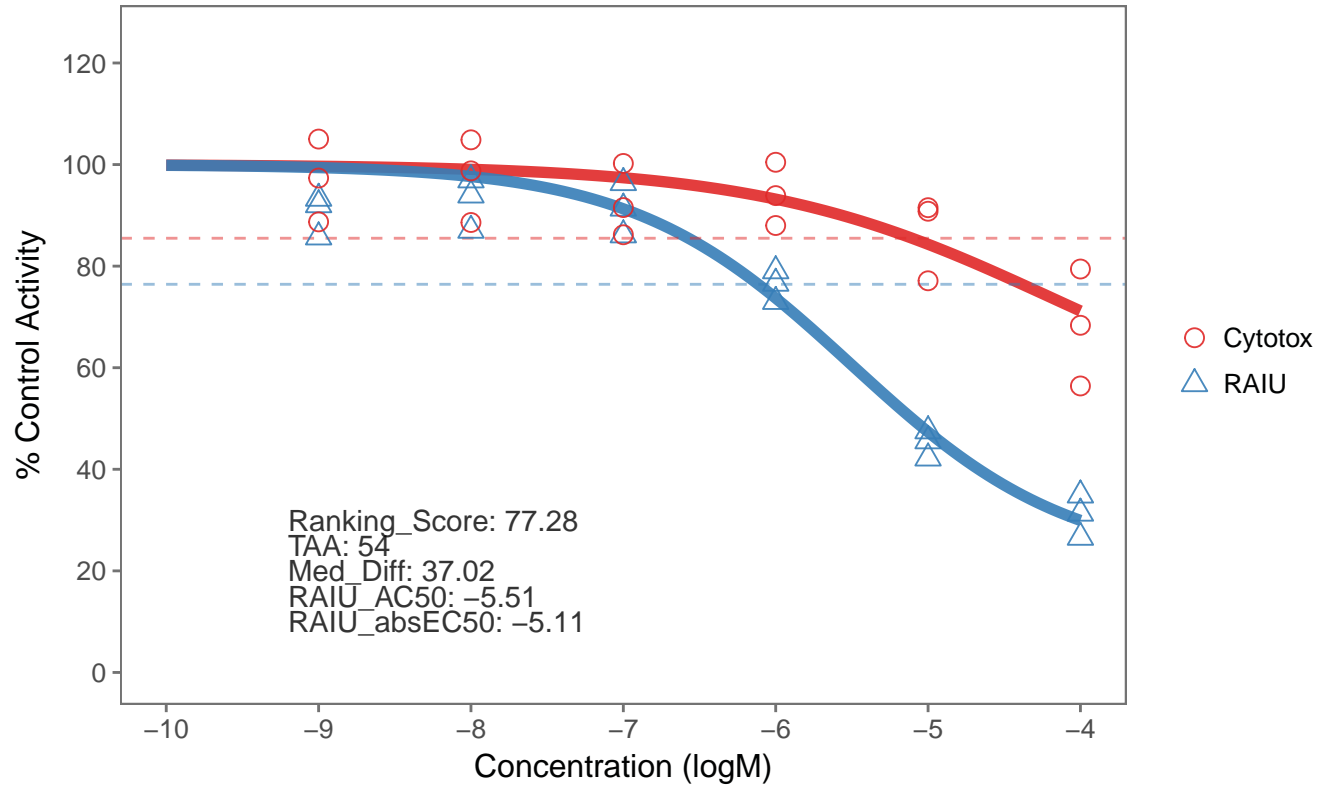

10. SPID: TP0001687E04  
NAME: Hexachlorocyclopentadiene  
CAS NO: 77-47-4

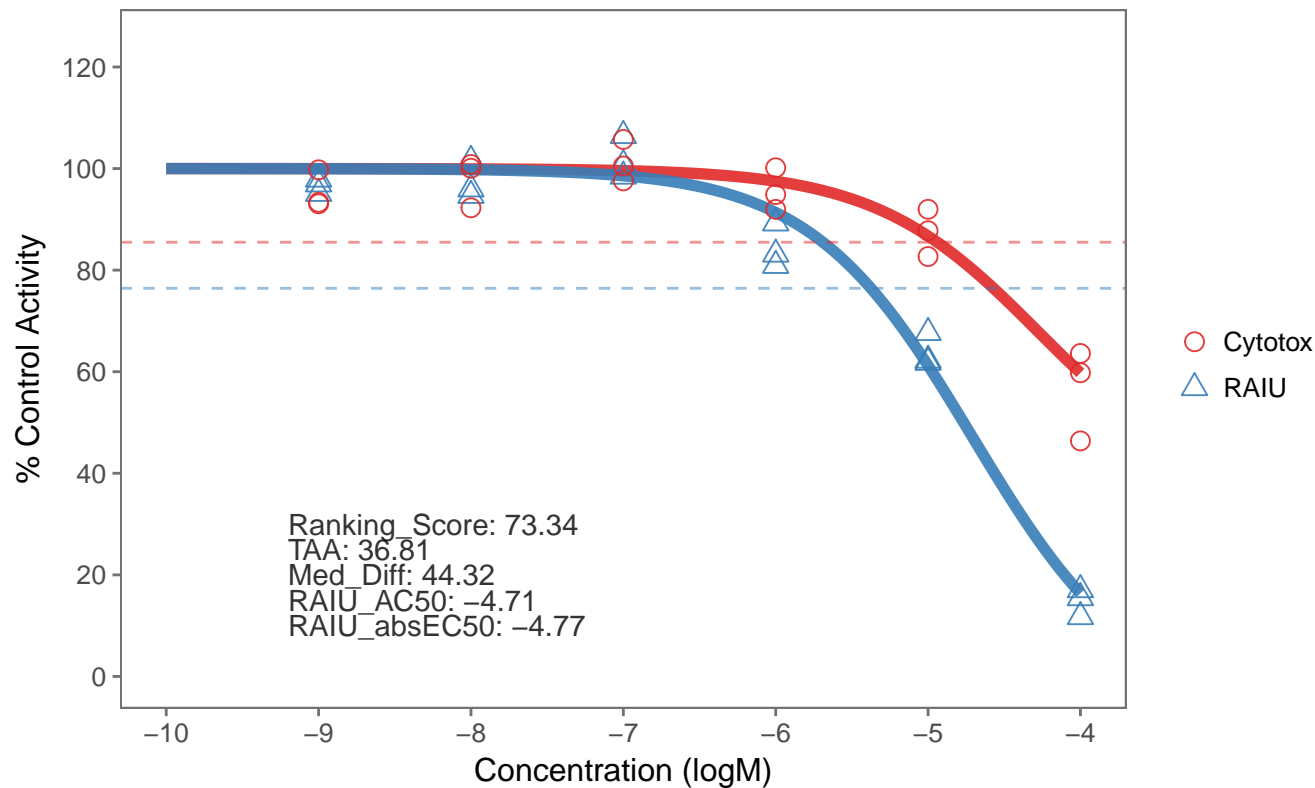

11. SPID: TP0001682G05  
NAME: Mepanipirim  
CAS NO: 110235-47-7

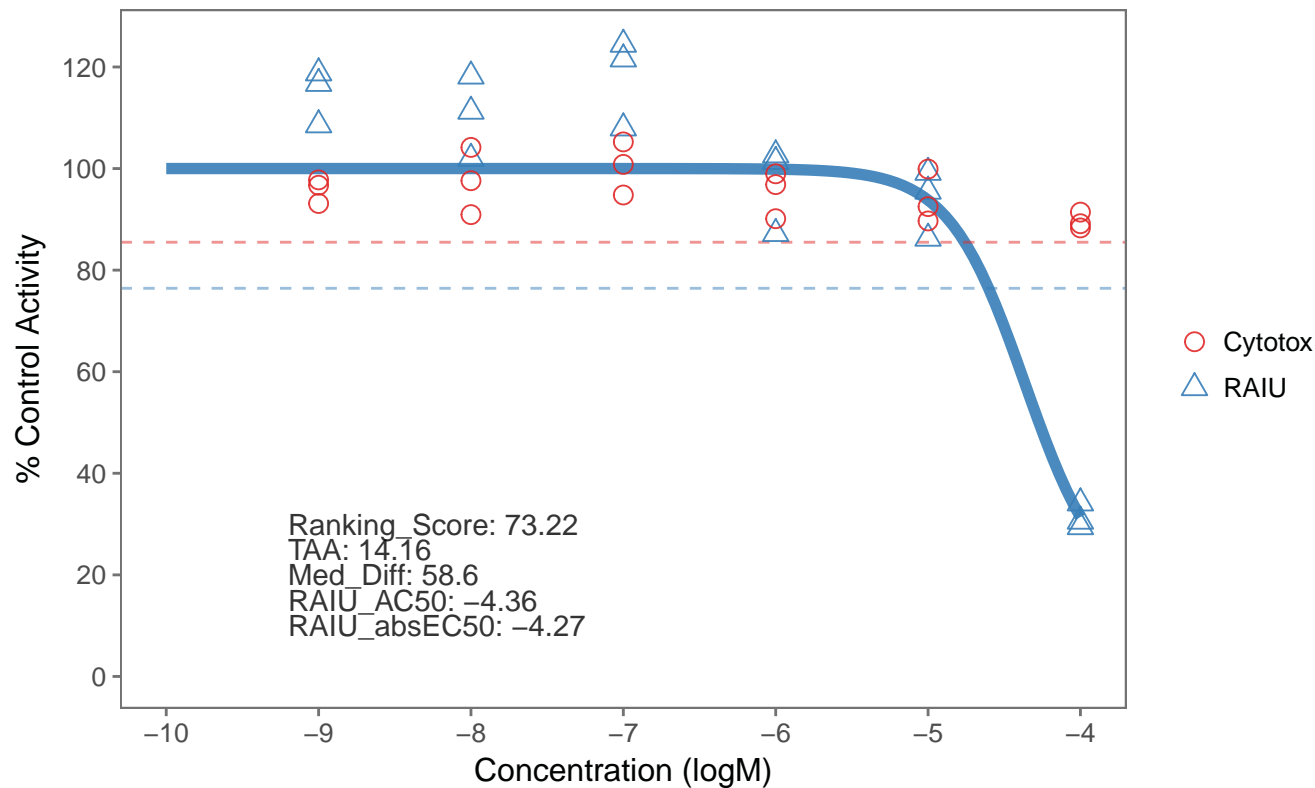

12. SPID: TP0001686E08  
NAME: 4-Chloro-1,2-diaminobenzene  
CAS NO: 95-83-0

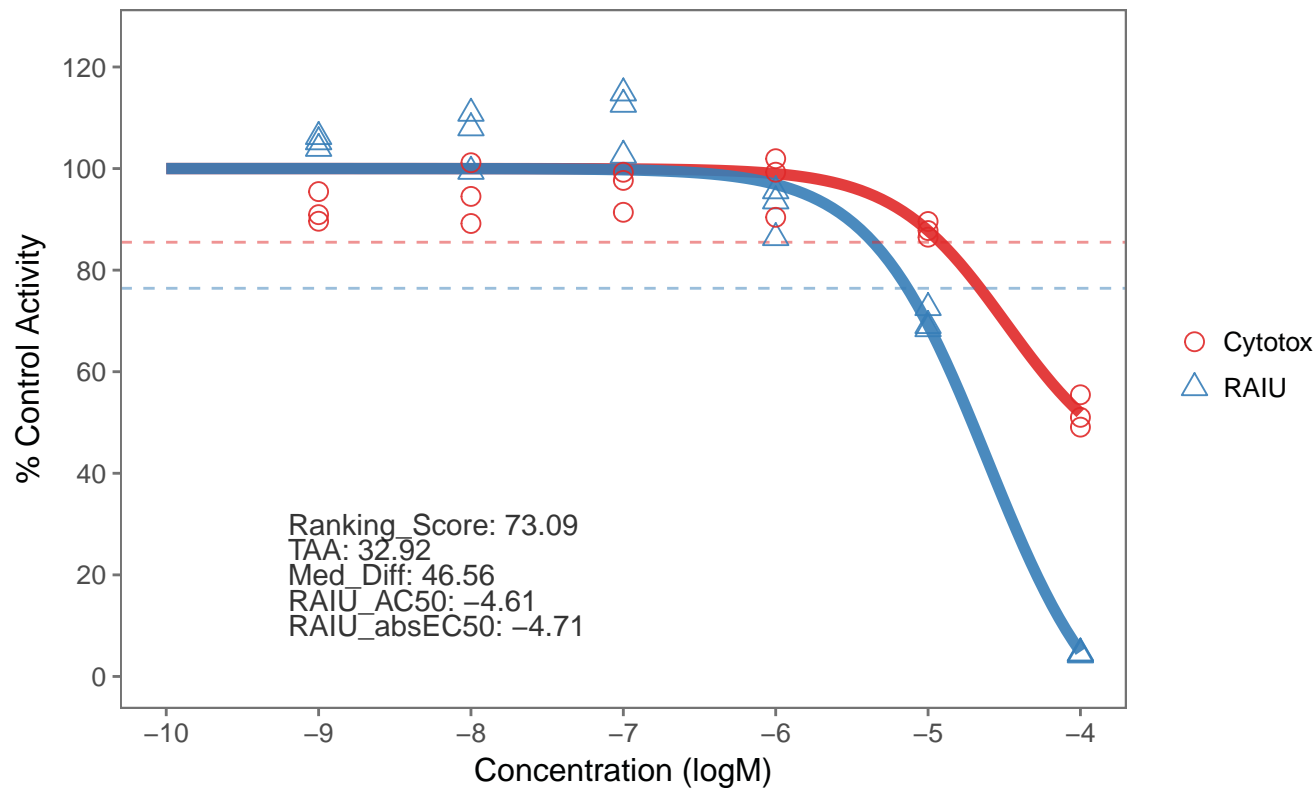

13. SPID: TP0001681E03

NAME: PFOS

CAS NO: 1763-23-1

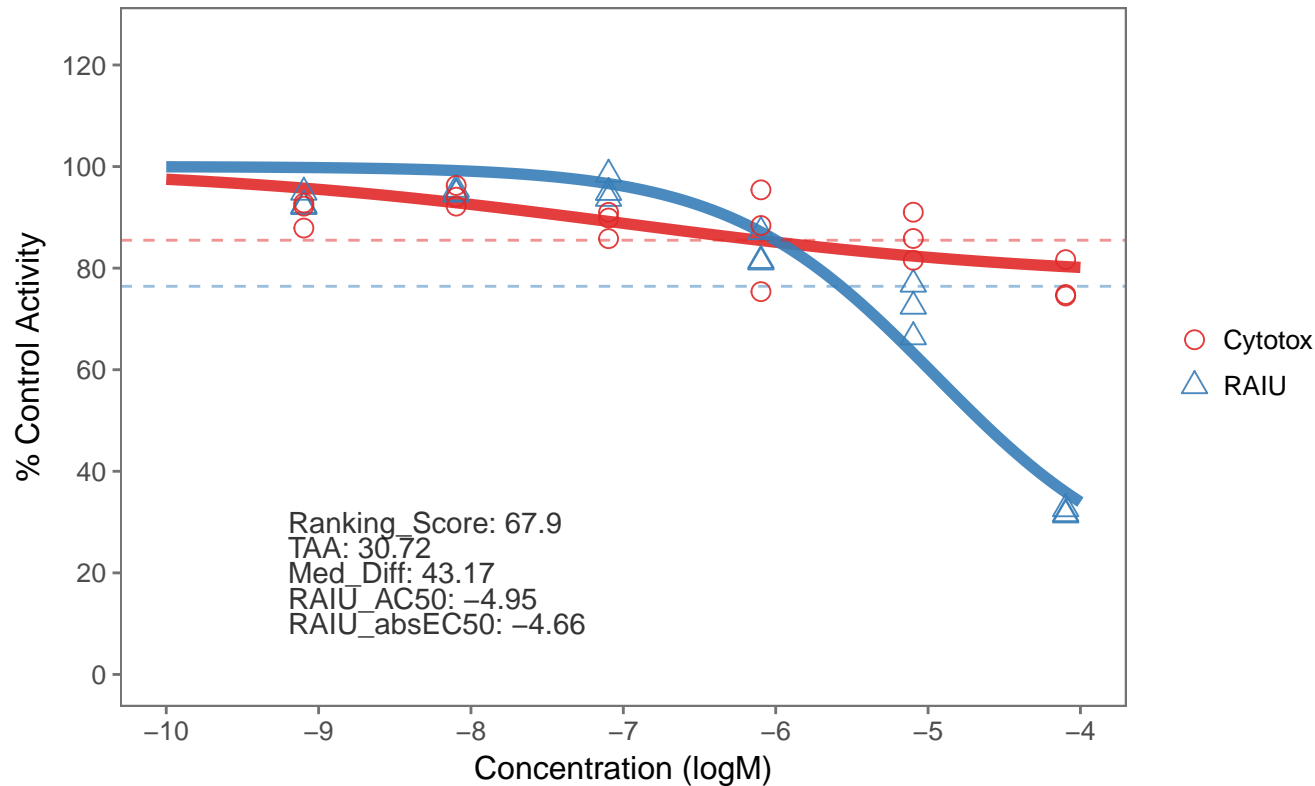

14. SPID: TP0001683B03

NAME: Nelivaptan

CAS NO: 439687-69-1

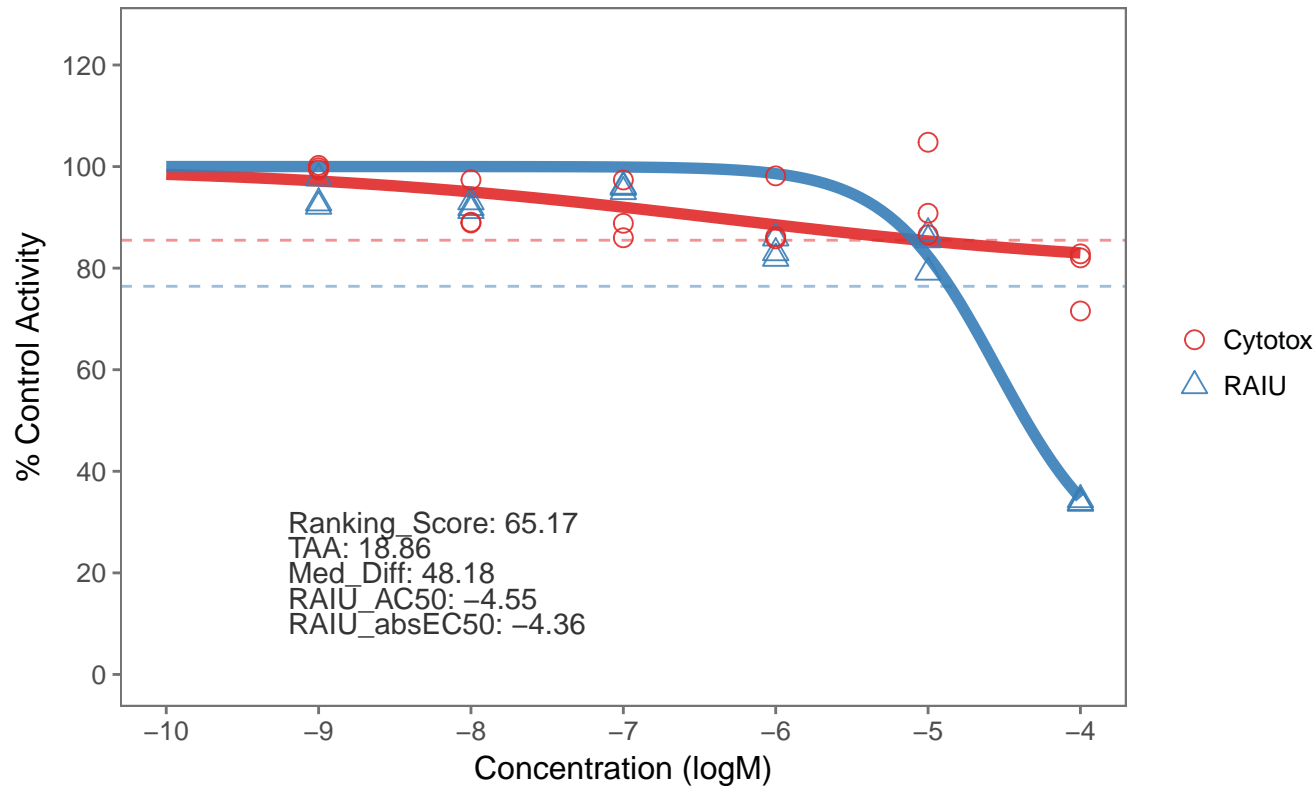

15. SPID: TP0001680B04

NAME: Zamifenacin

CAS NO: 127308-82-1

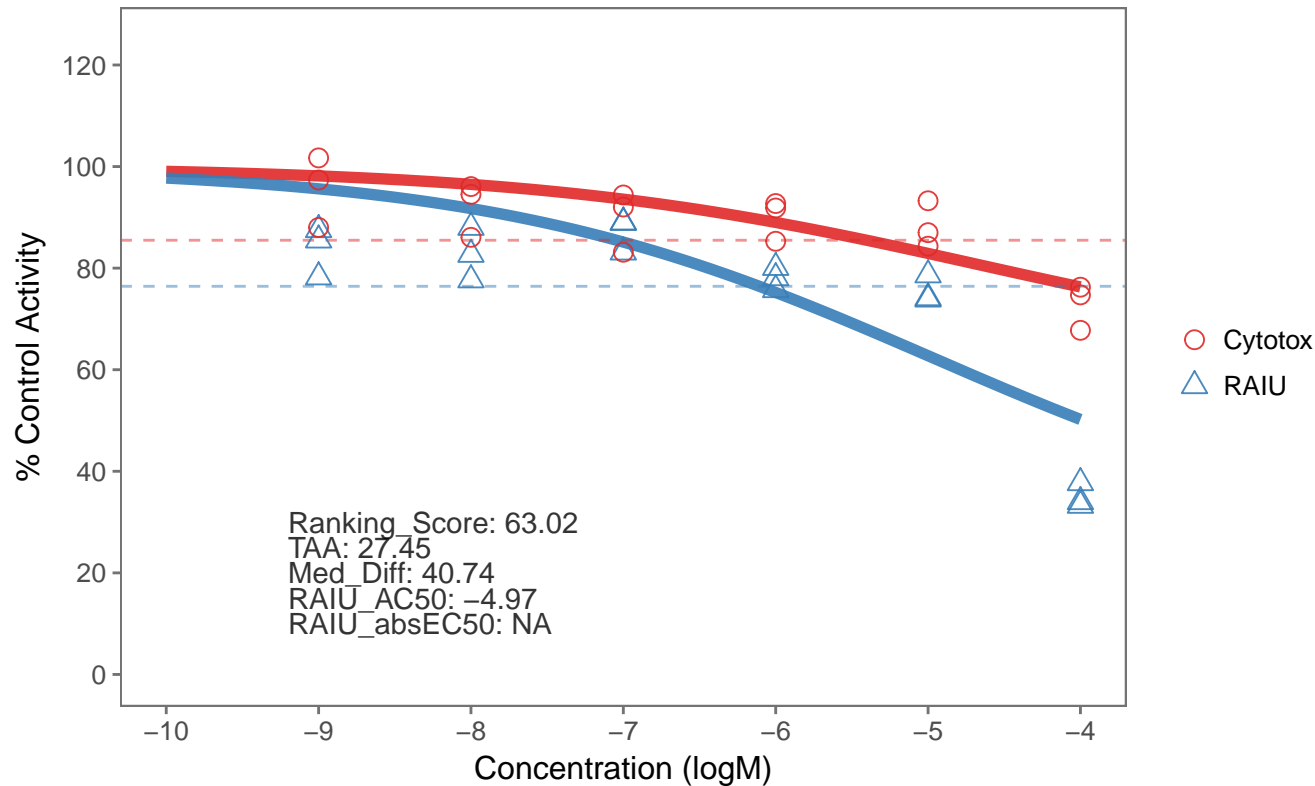

16. SPID: TP0001681G09  
NAME: 2,5-Di-tert-butylbenzene-1,4-diol  
CAS NO: 88-58-4

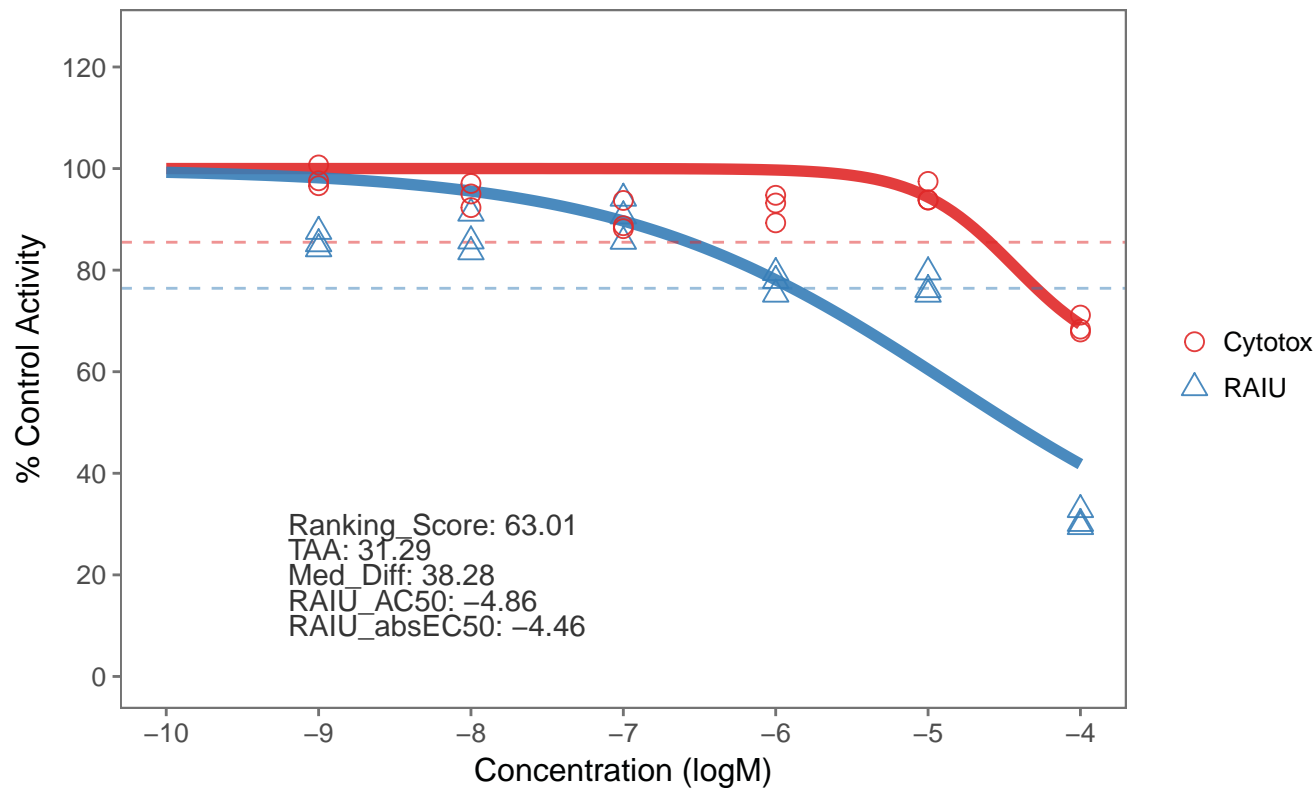



17. SPID: TP0001686G11  
NAME: Sodium dodecyl sulfate  
CAS NO: 151-21-3

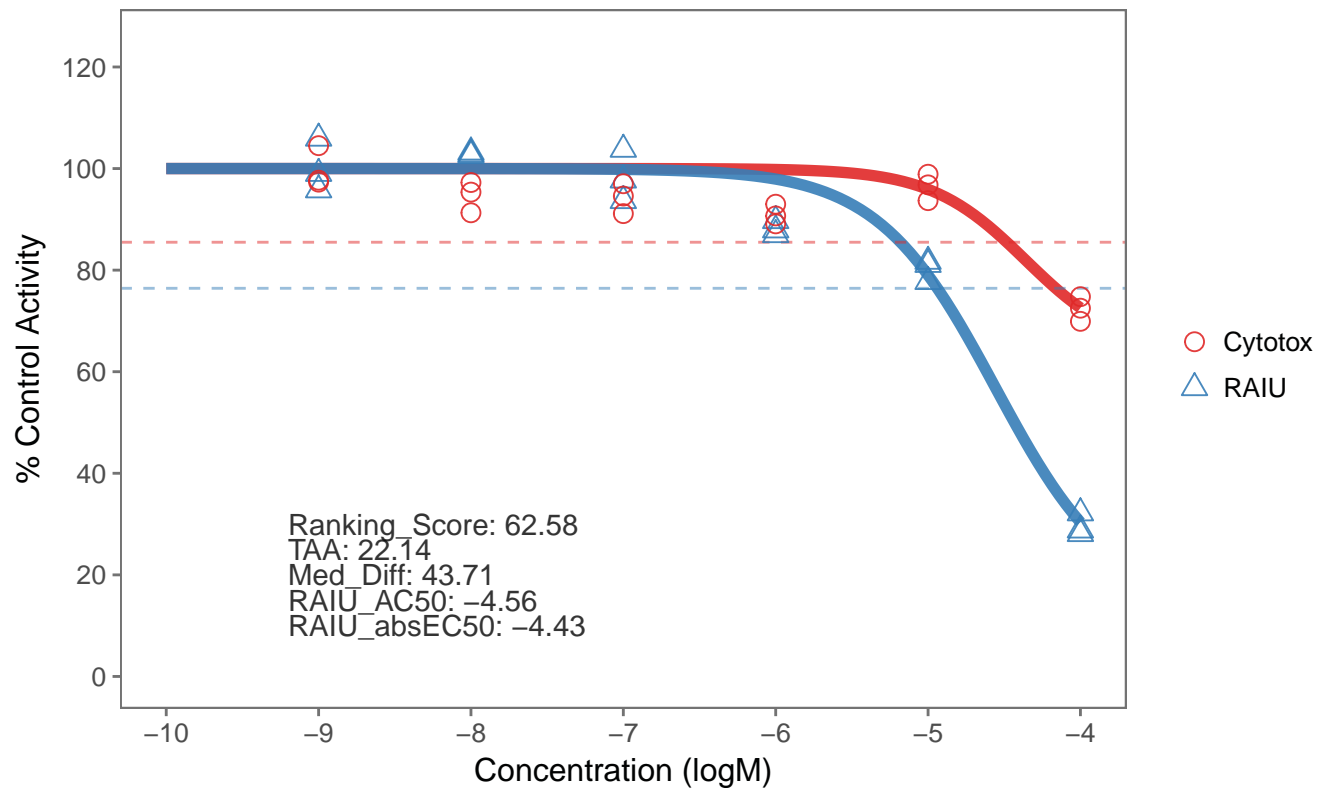

18. SPID: TP0001684G03  
NAME: Tannic acid  
CAS NO: 1401-55-4

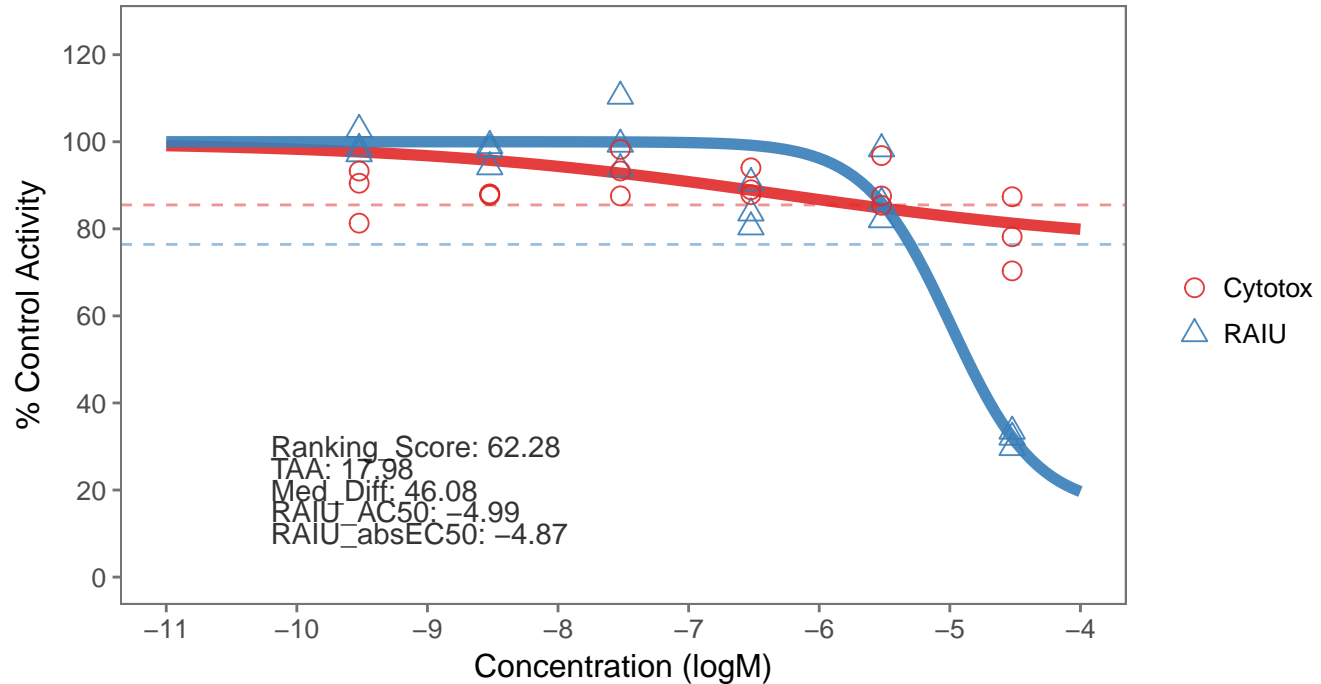

19. SPID: TP0001678C05  
NAME: Tributyltin methacrylate  
CAS NO: 2155-70-6

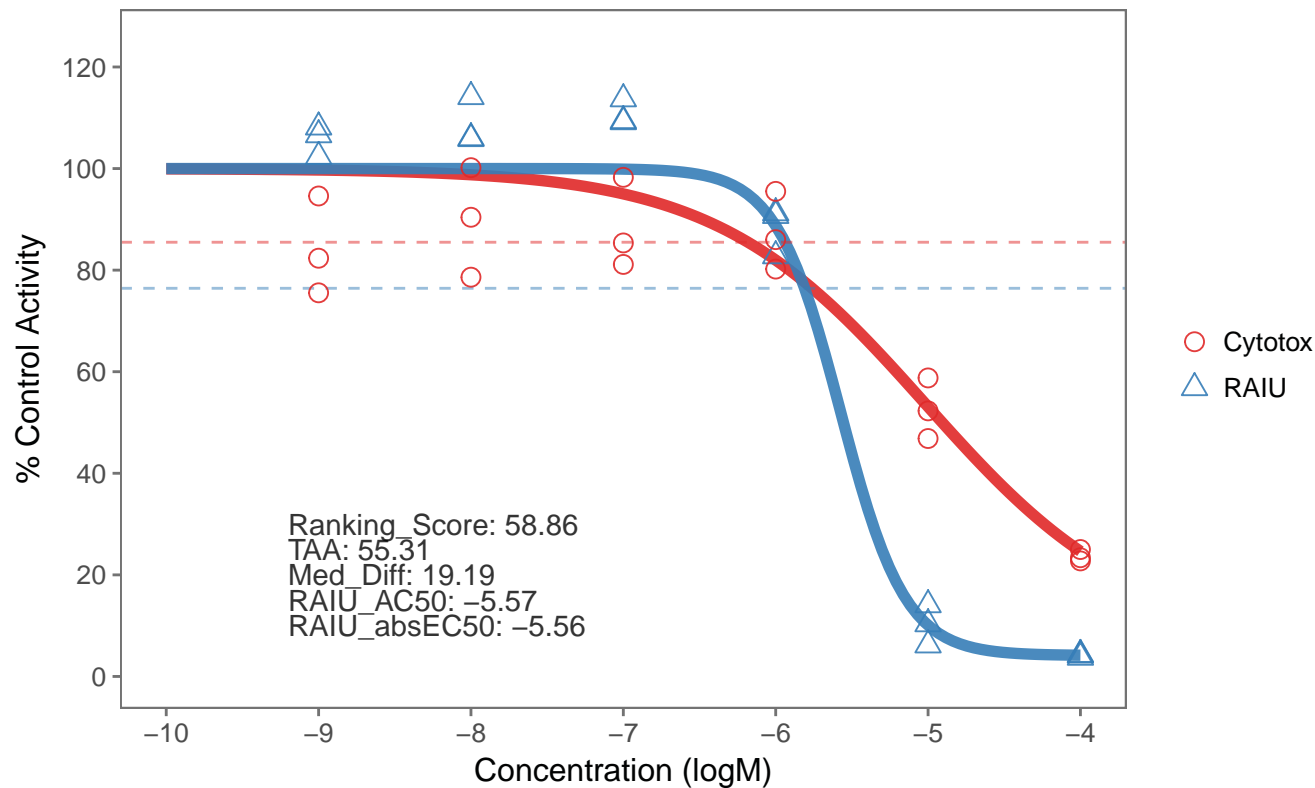

20. SPID: TP0001677D10

NAME: Ethion

CAS NO: 563-12-2

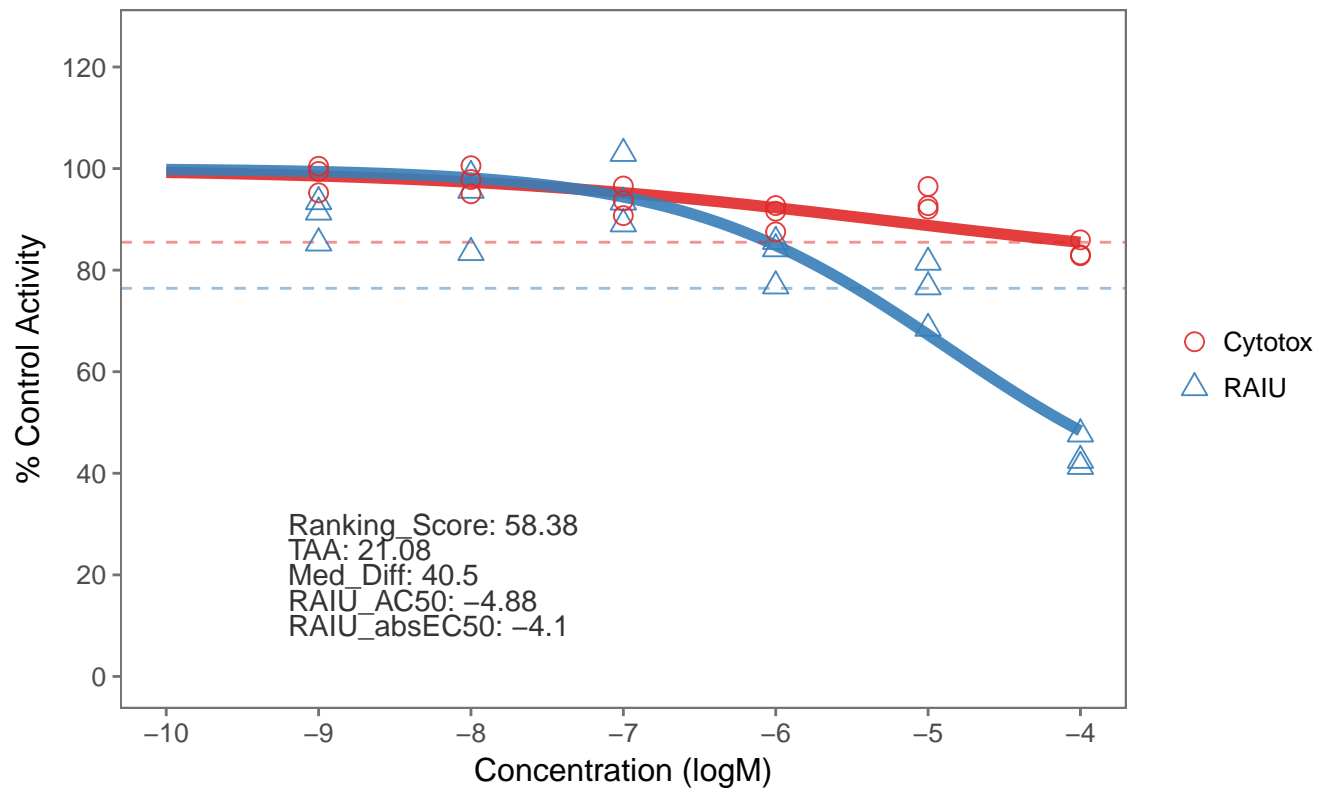

21. SPID: TP0001684C01

NAME: Dieldrin

CAS NO: 60-57-1

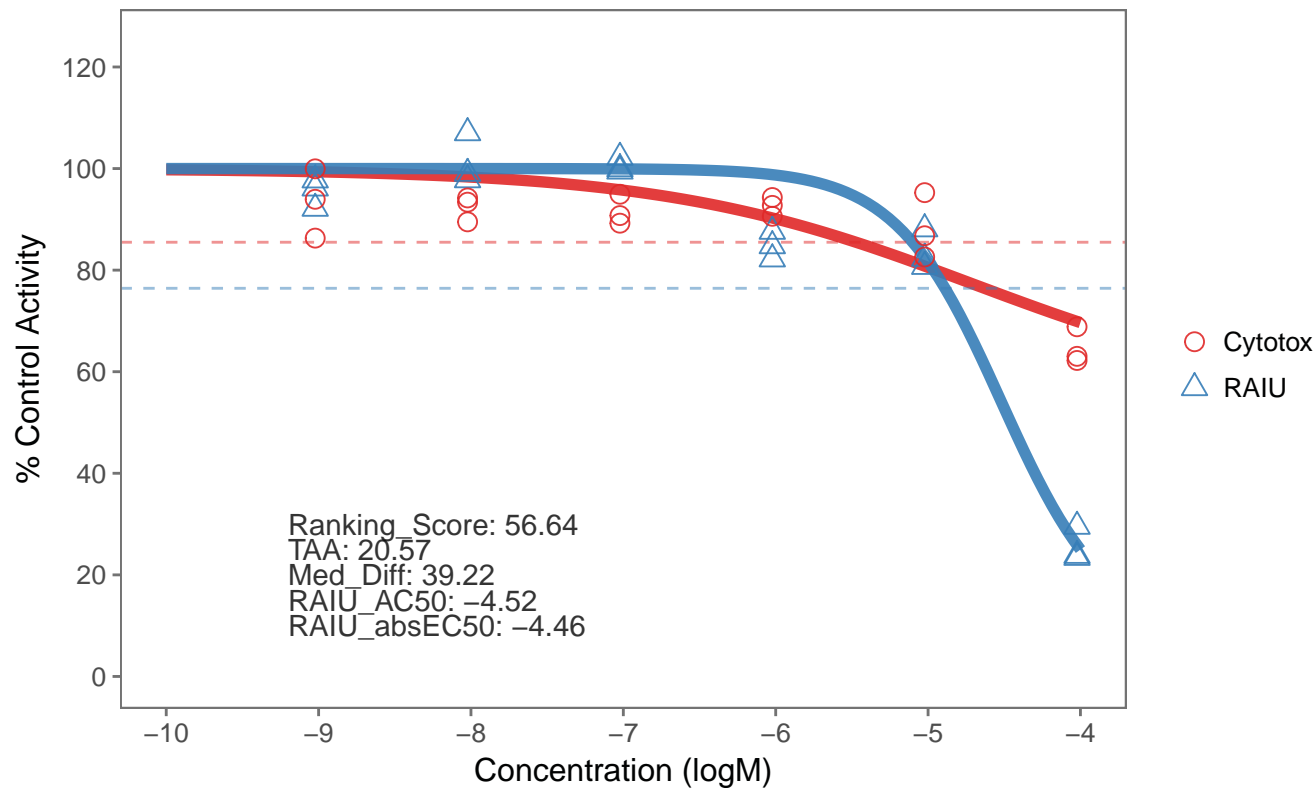

22. SPID: TP0001683F08  
NAME: 2,3-Diaminotoluene  
CAS NO: 2687-25-4

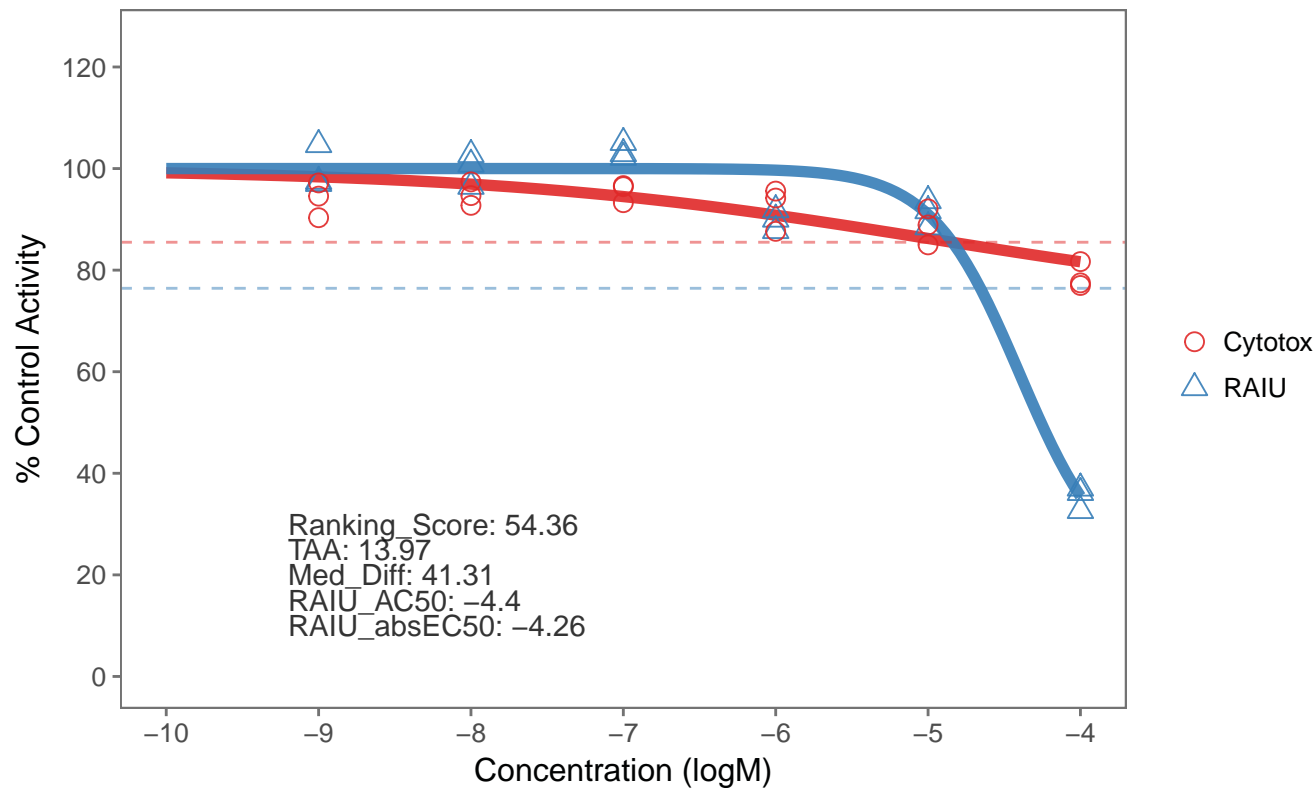

23. SPID: TP0001678G01  
NAME: PK 11195  
CAS NO: 85532-75-8

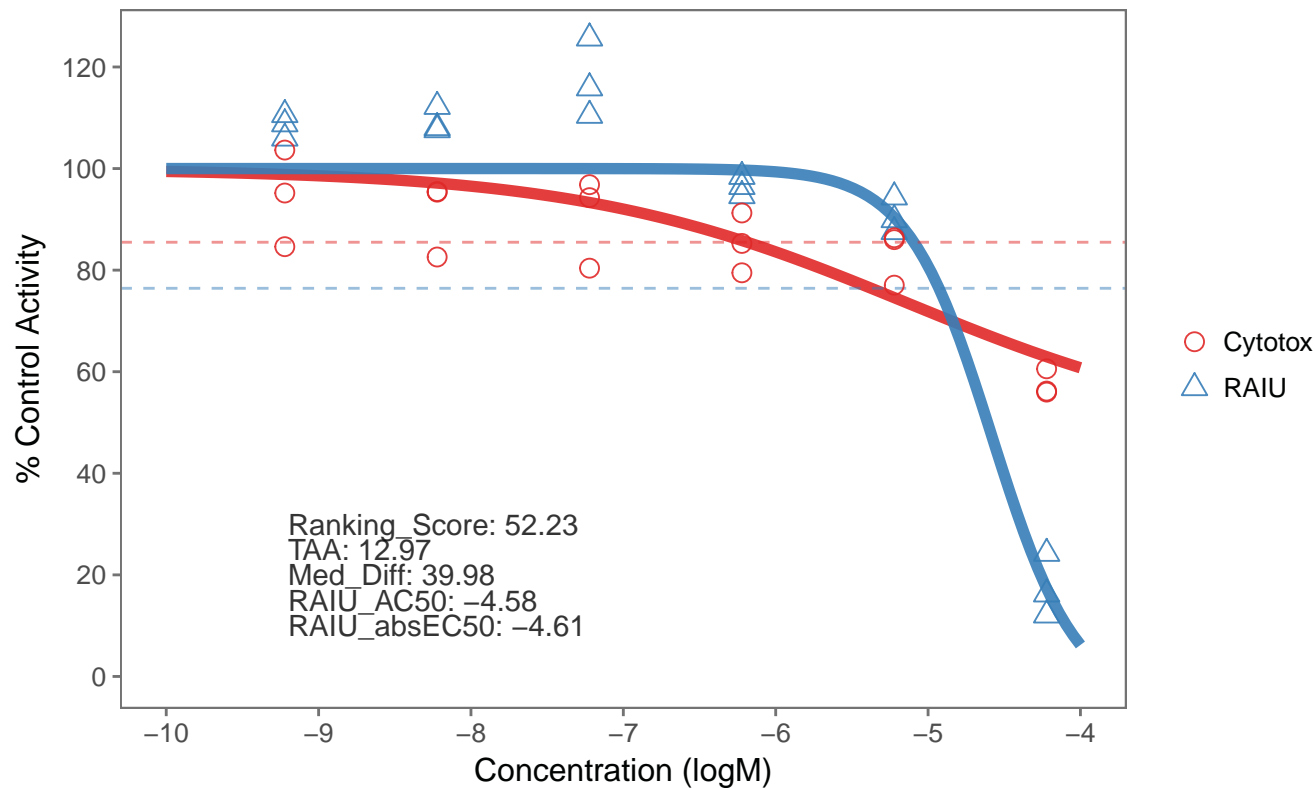

24. SPID: TP0001683B02  
NAME: 2,4,5-Trichlorophenol  
CAS NO: 95-95-4

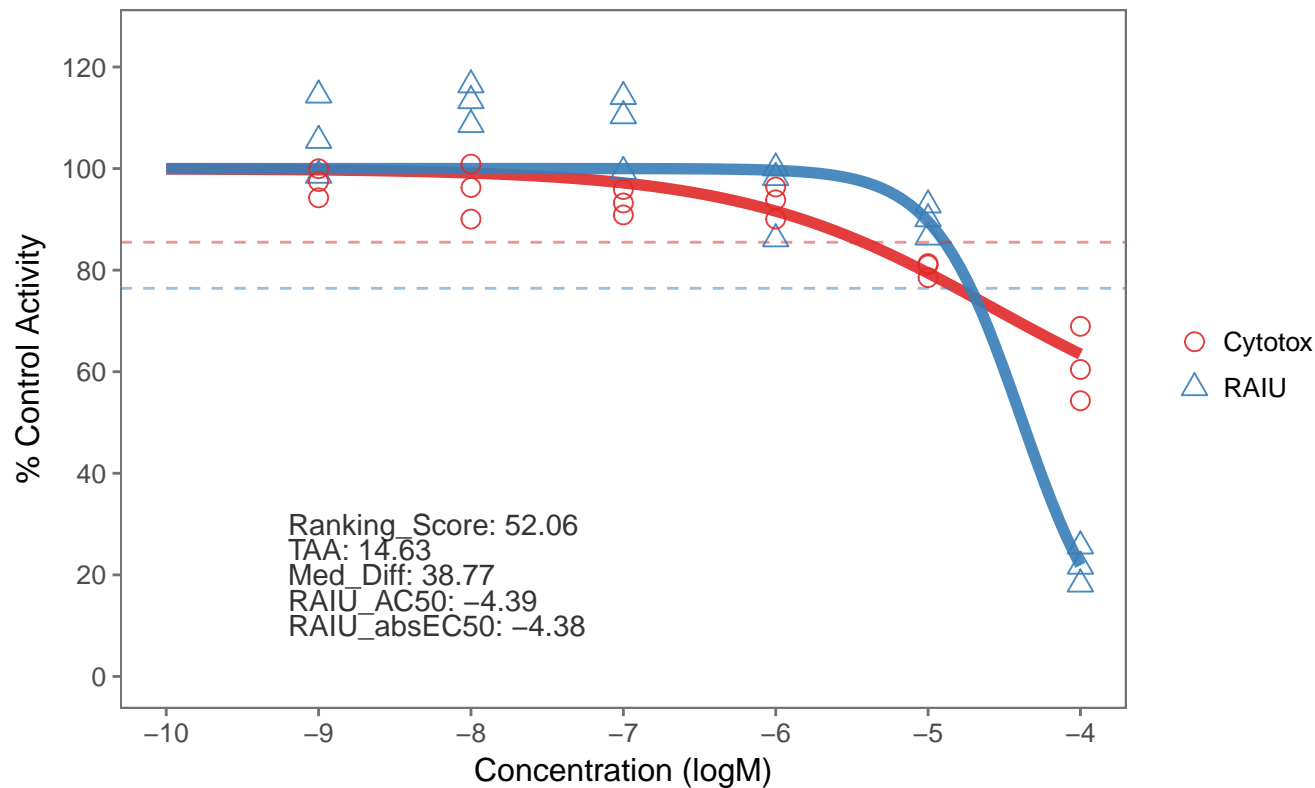



25. SPID: TP0001687D04  
NAME: Cyproterone acetate  
CAS NO: 427-51-0

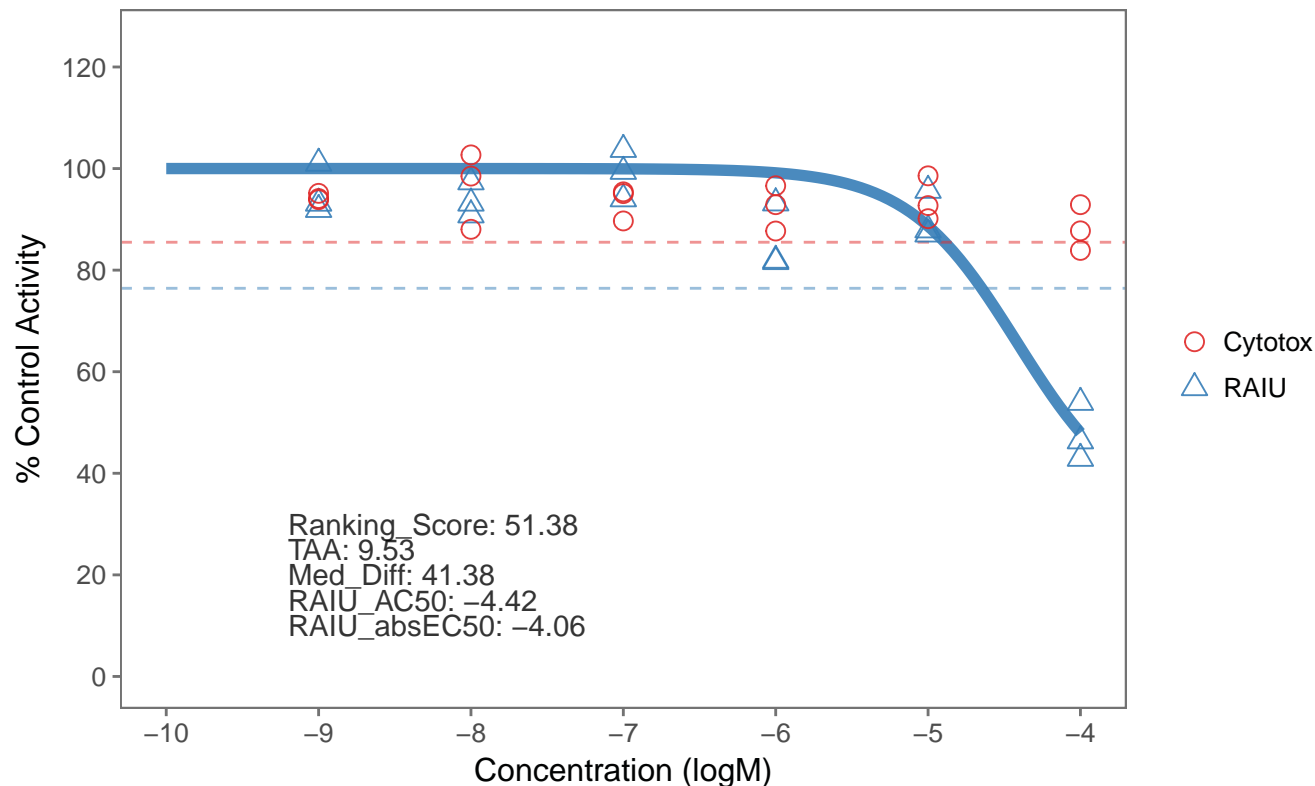

26. SPID: TP0001684C04  
NAME: PharmaGSID\_47337  
CAS NO: 1061517-62-1

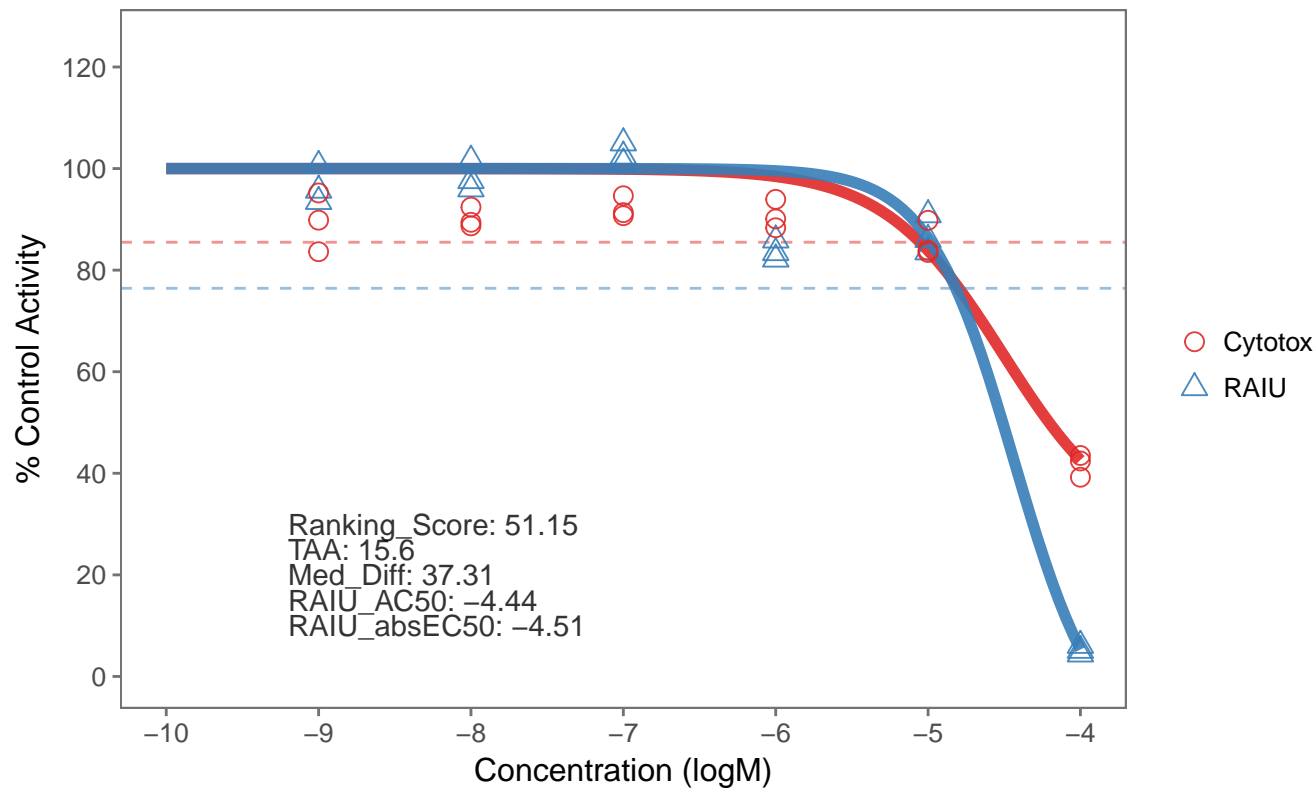

27. SPID: TP0001688G03  
NAME: Pioglitazone hydrochloride  
CAS NO: 112529-15-4

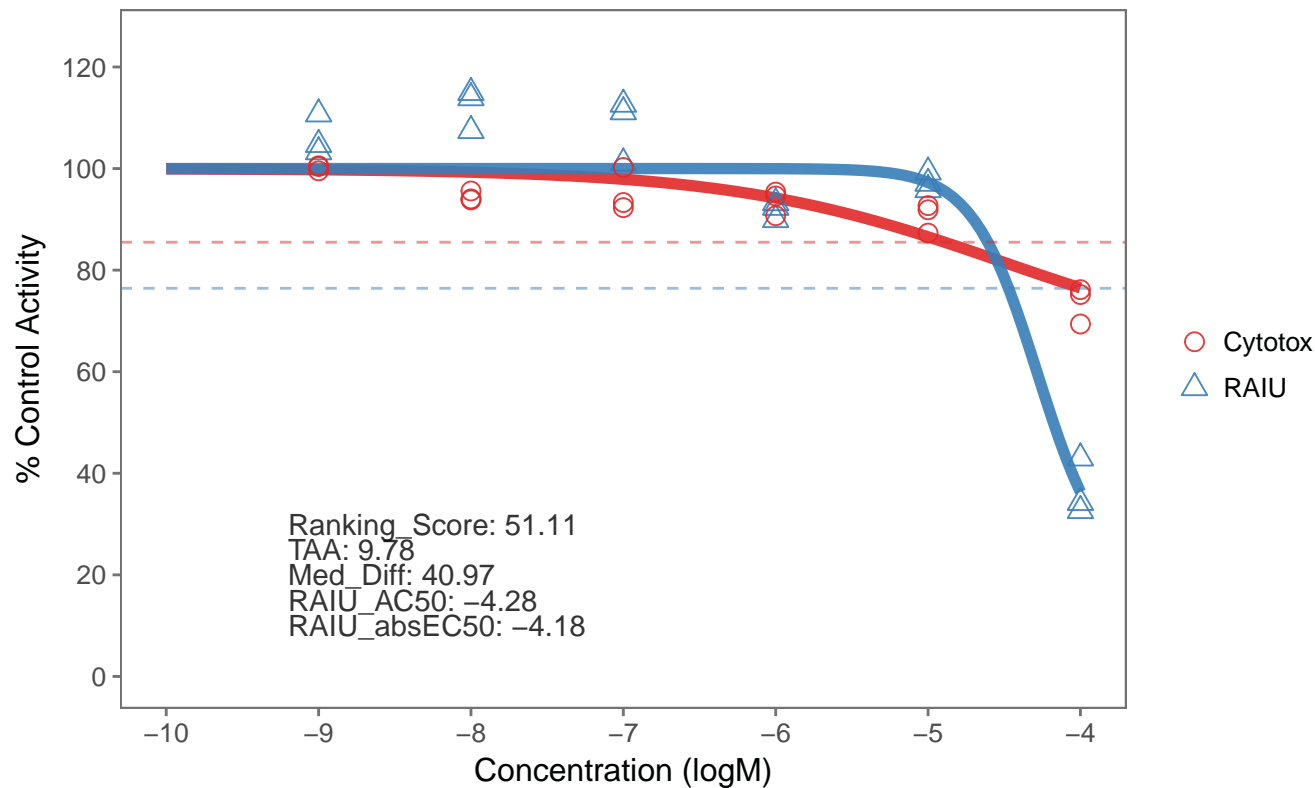

28. SPID: TP0001677E01  
NAME: Heptachlor epoxide  
CAS NO: 1024-57-3

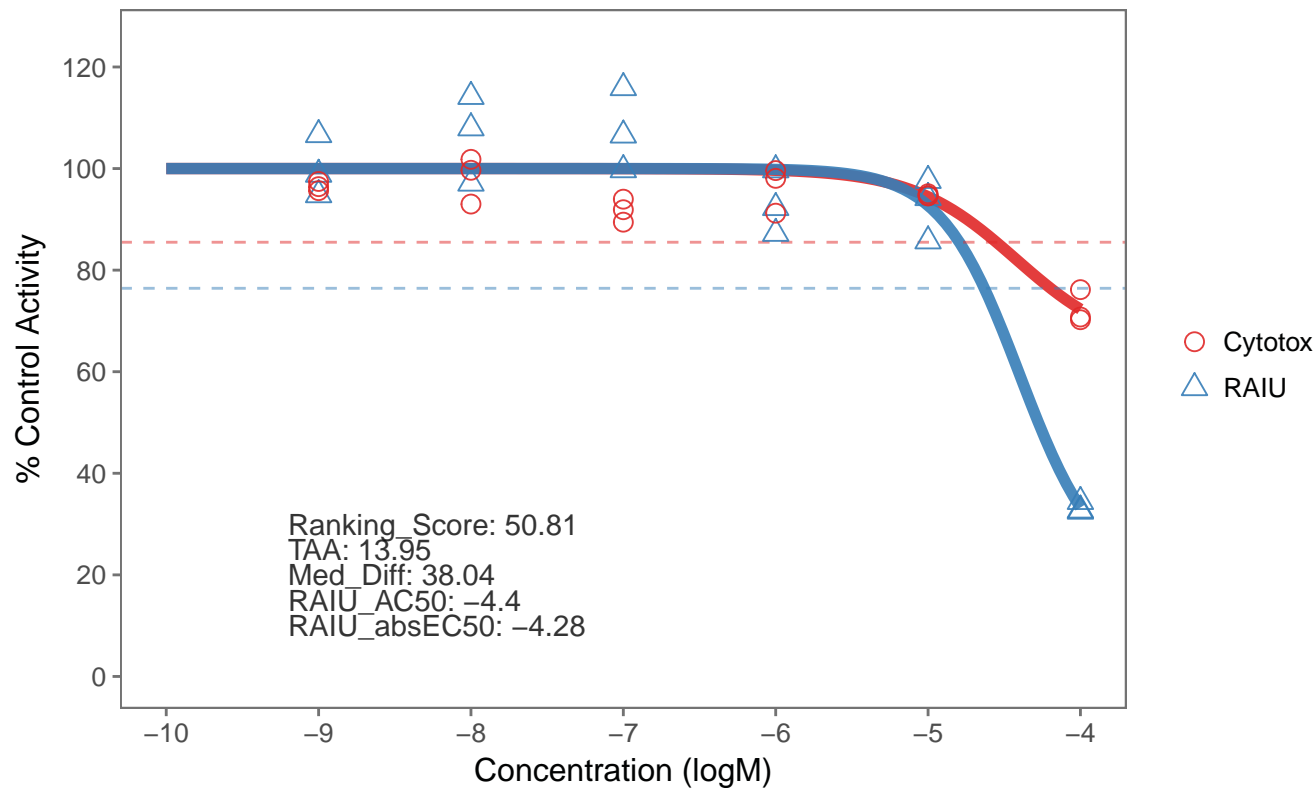

29. SPID: TP0001689A01  
NAME: 4,4'-Methylenebis(N,N-dimethylaniline)  
CAS NO: 101-61-1

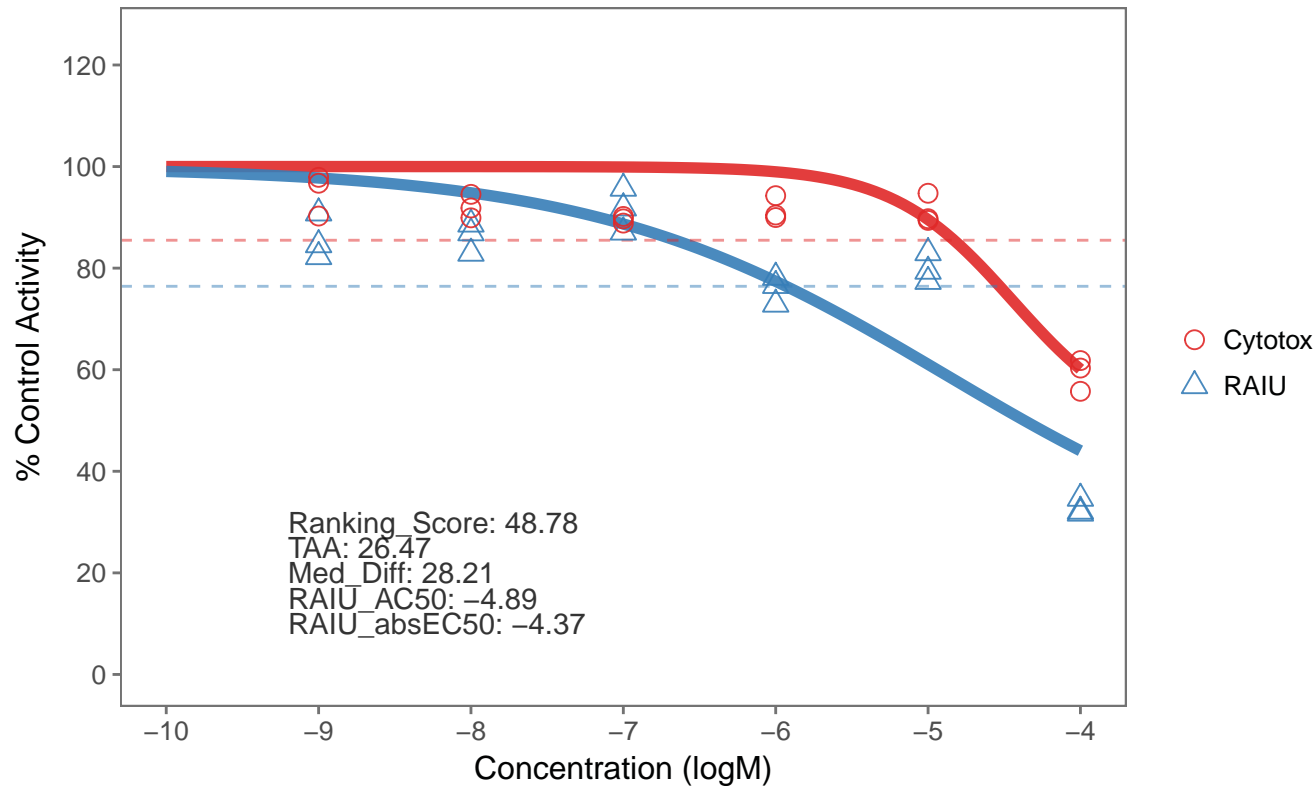

30. SPID: TP0001686G10  
NAME: SAR115740  
CAS NO: NOCAS\_47366

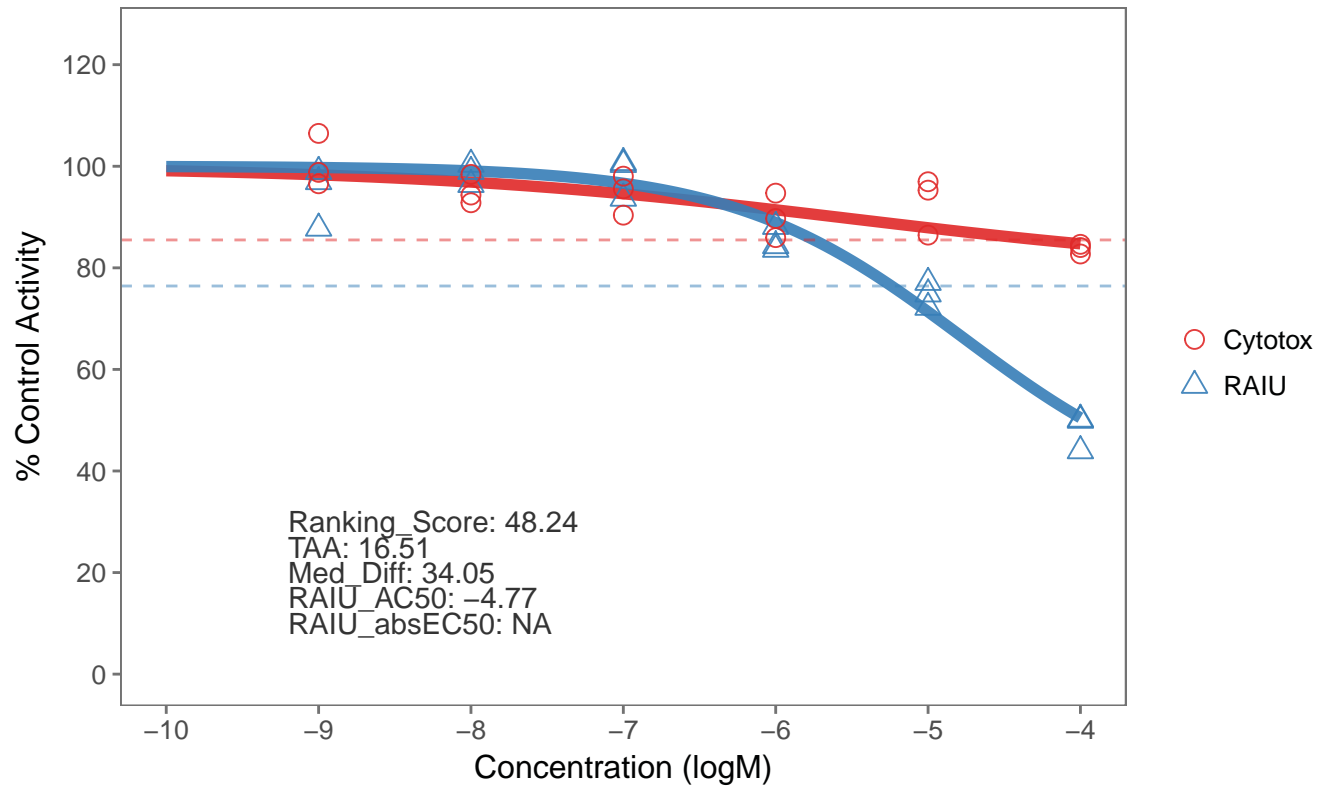

31. SPID: TP0001686D09  
NAME: Chlorpromazine hydrochloride  
CAS NO: 69-09-0

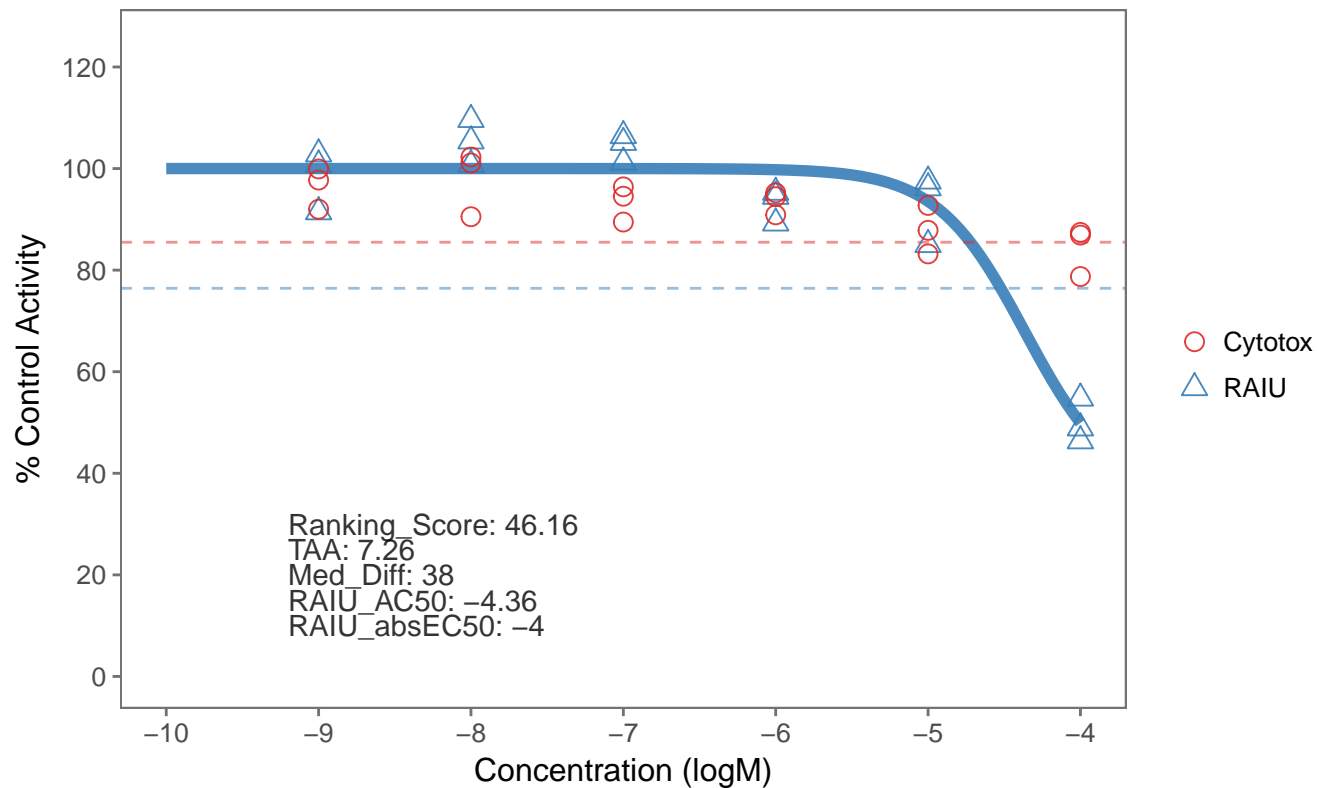

32. SPID: TP0001679C07

NAME: Chlorpyrifos

CAS NO: 2921-88-2

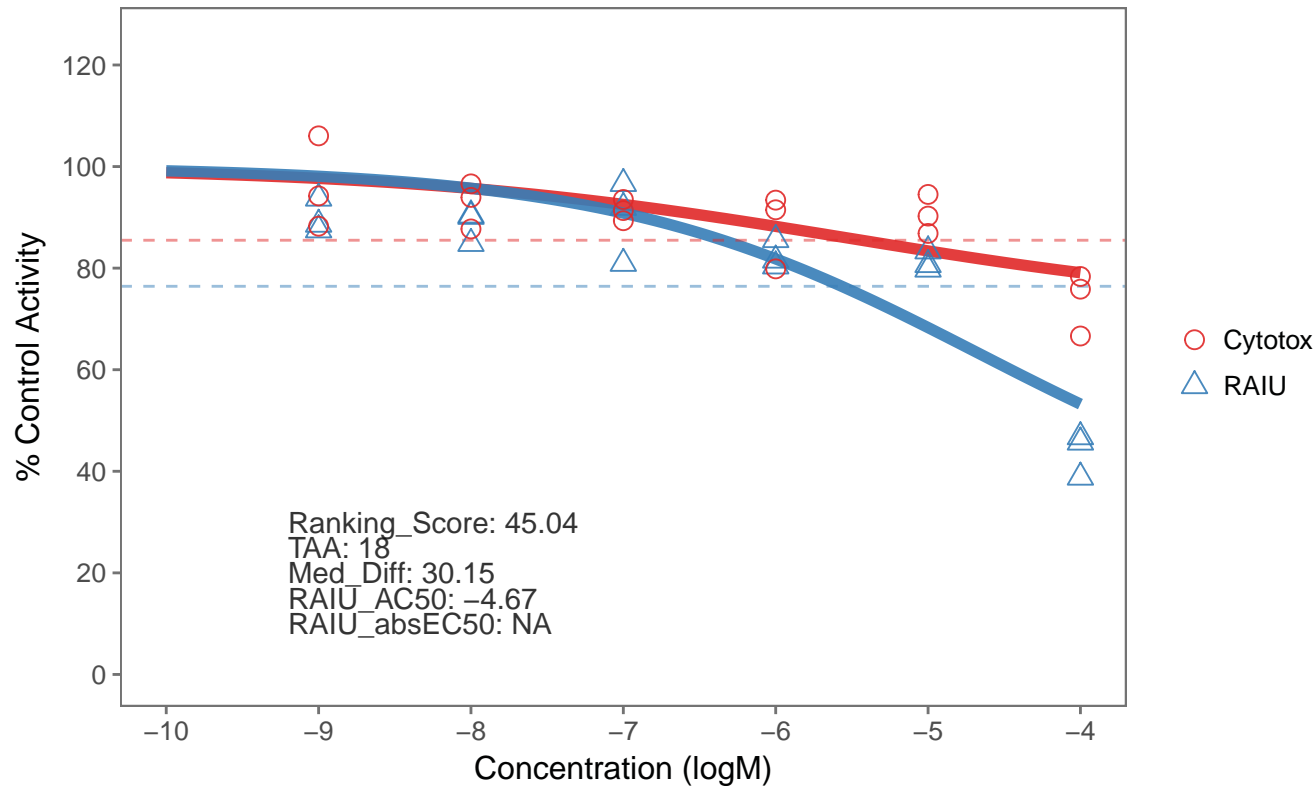



33. SPID: TP0001681C09  
NAME: Dicumyl peroxide  
CAS NO: 80-43-3

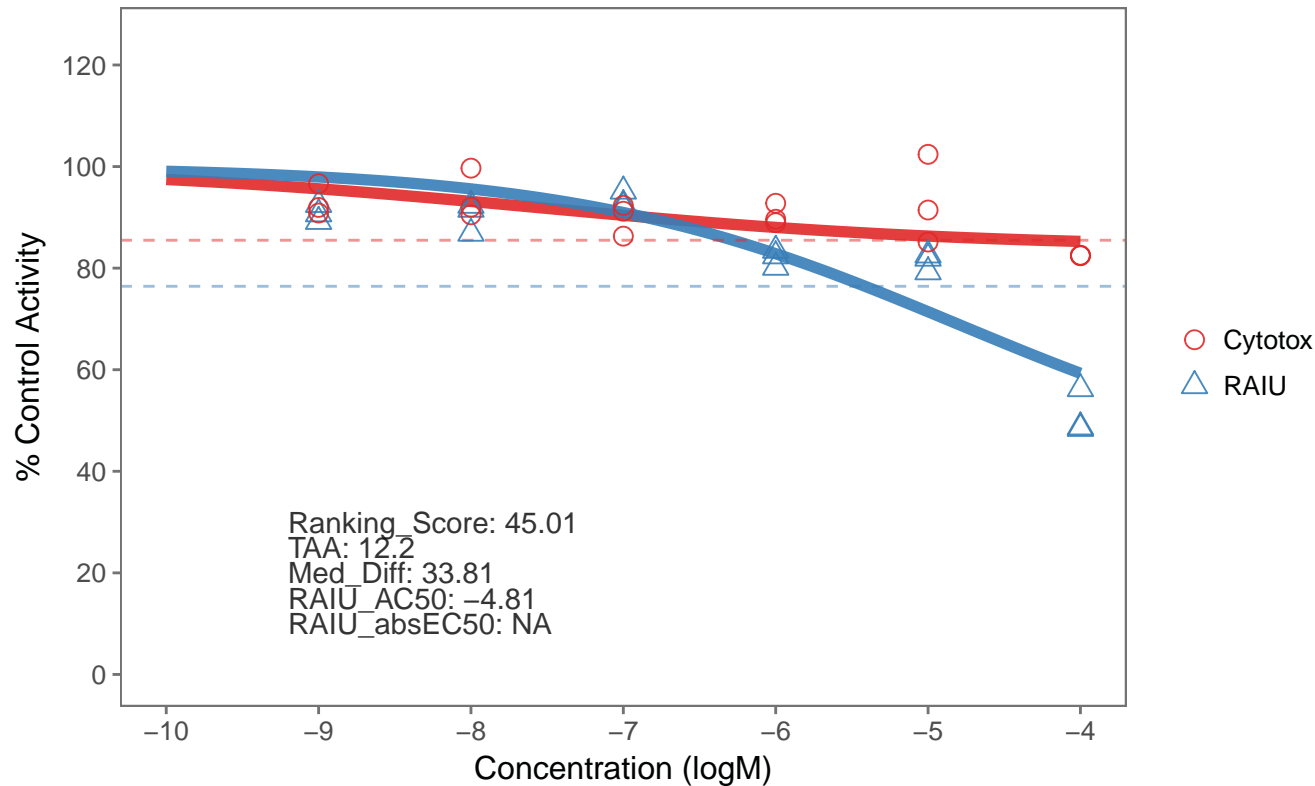

34. SPID: TP0001688F03

NAME: Sulfasalazine

CAS NO: 599-79-1

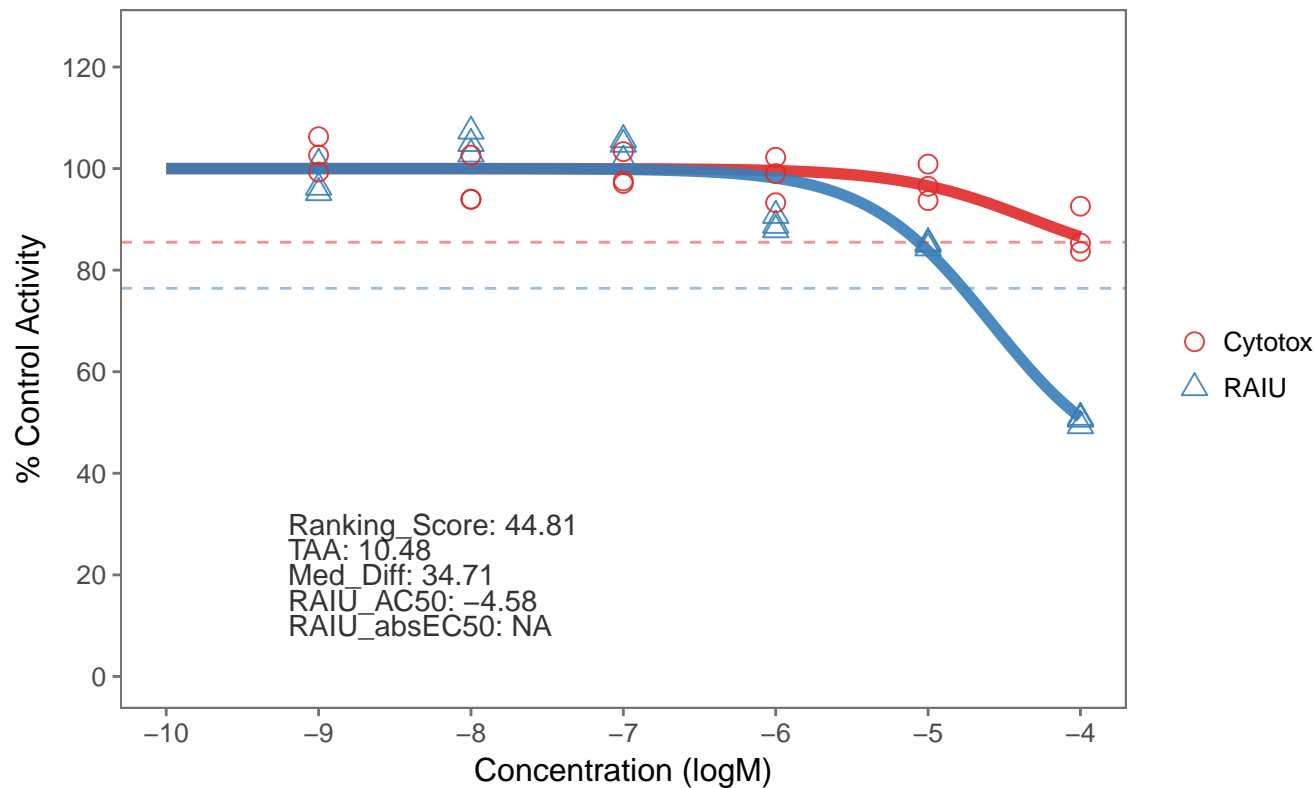

35. SPID: TP0001685G04  
NAME: EPN  
CAS NO: 2104-64-5

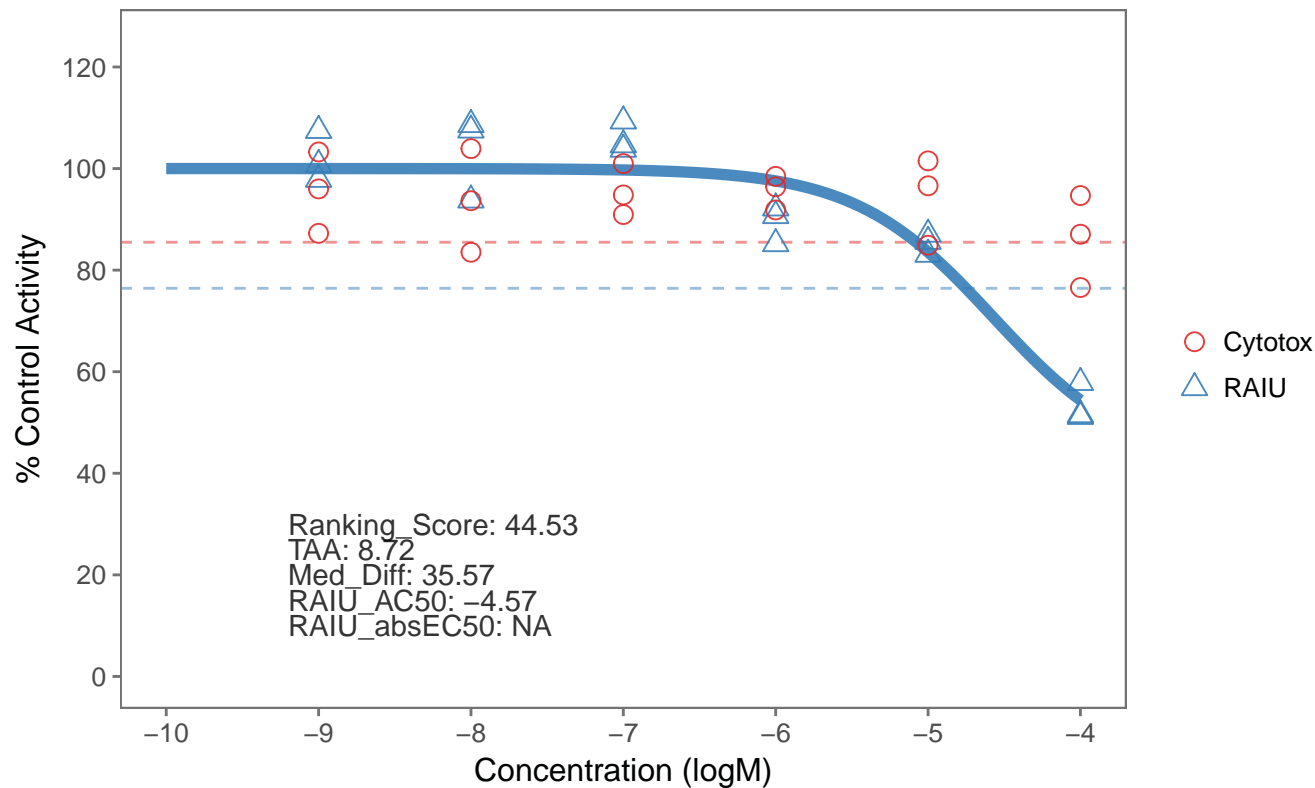

36. SPID: TP0001679G02  
NAME: 2-tert-Butyl-4-ethylphenol  
CAS NO: 96-70-8

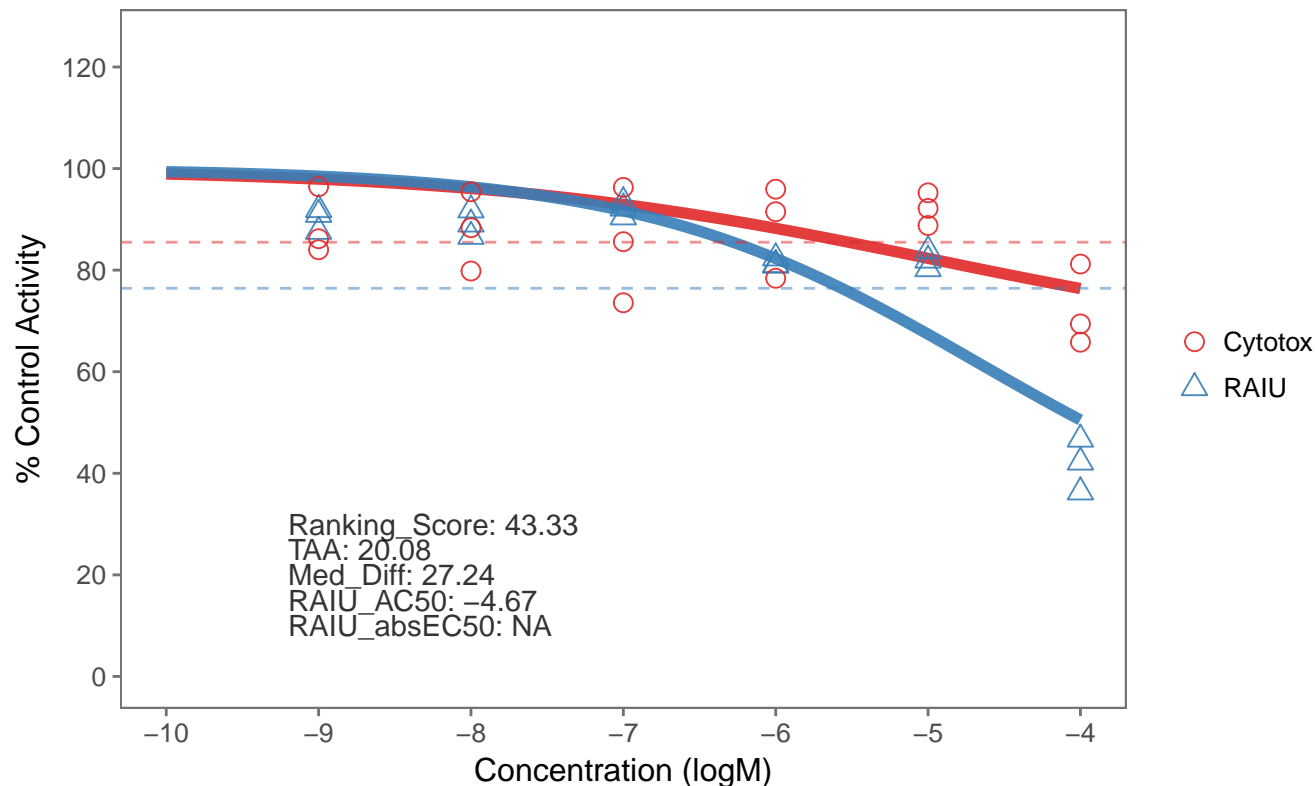

37. SPID: TP0001683D02  
NAME: 1,2-Benzenedicarboxaldehyde  
CAS NO: 643-79-8

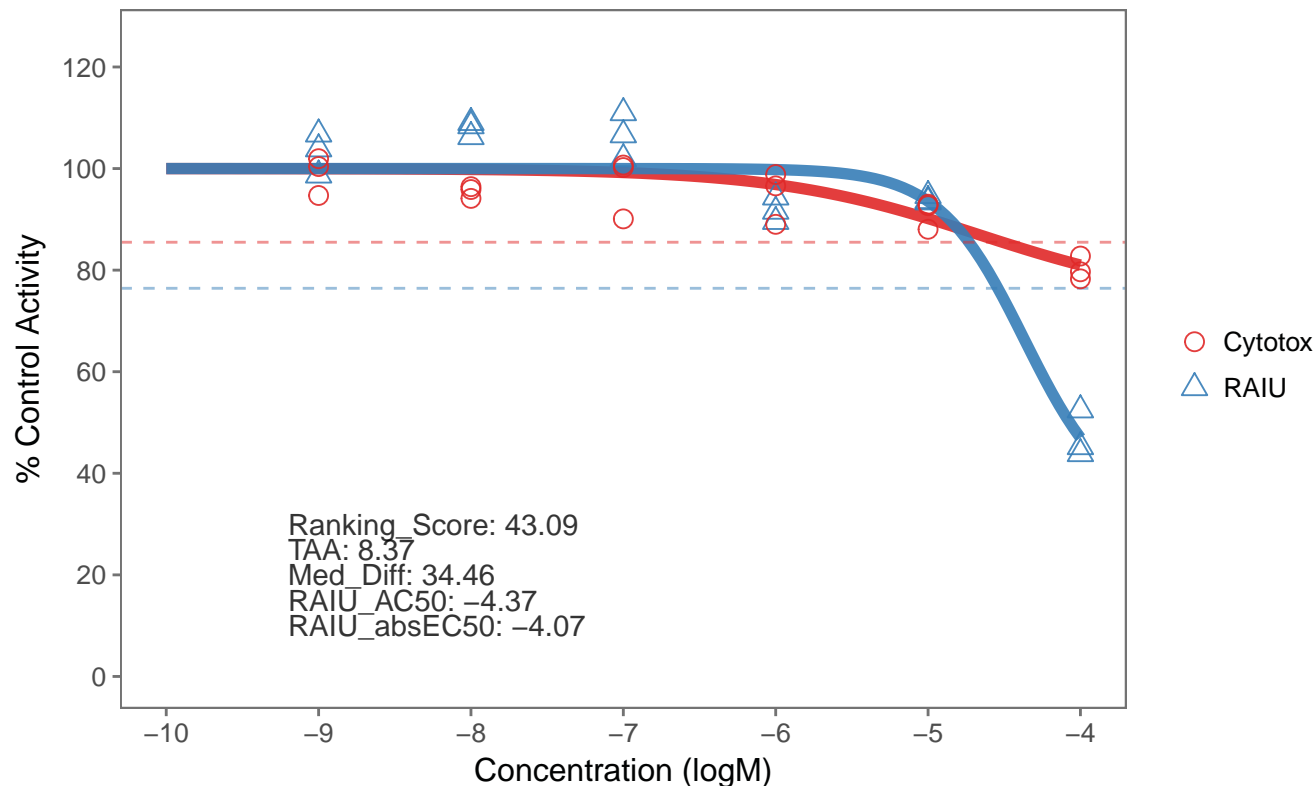

38. SPID: TP0001683E09  
NAME: Phenylmercuric acetate  
CAS NO: 62-38-4

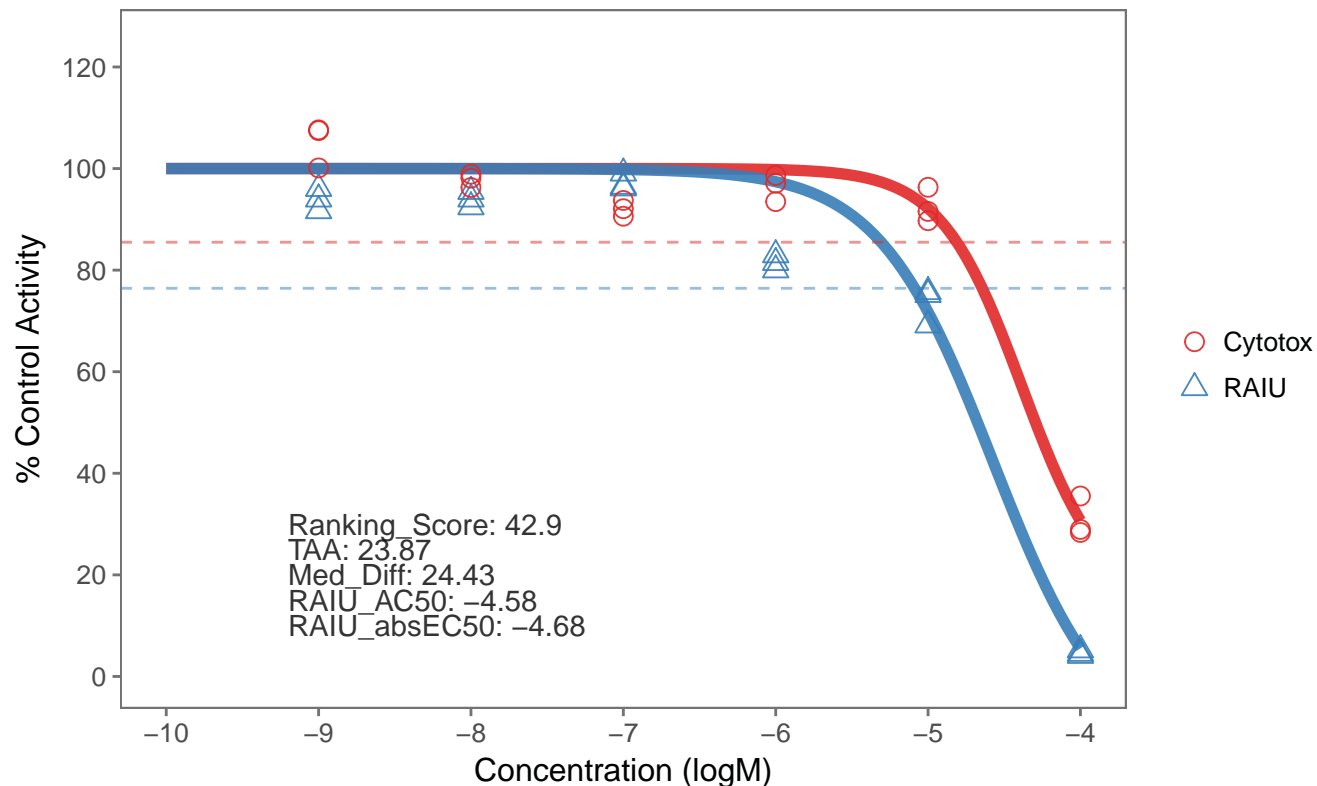

39. SPID: TP0001689D11  
NAME: SR125047  
CAS NO: NOCAS\_47342

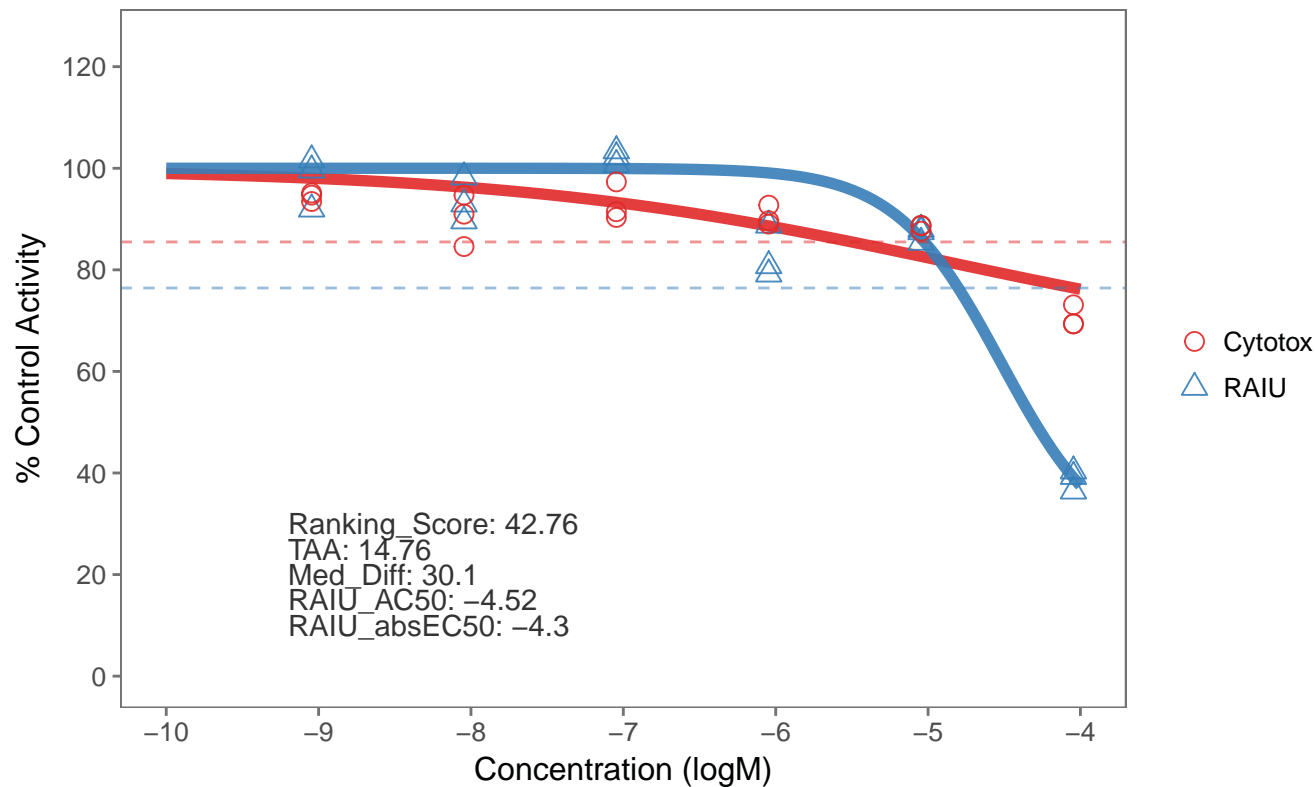

40. SPID: TP0001687B02  
NAME: Ro 23-7637  
CAS NO: 107071-66-9

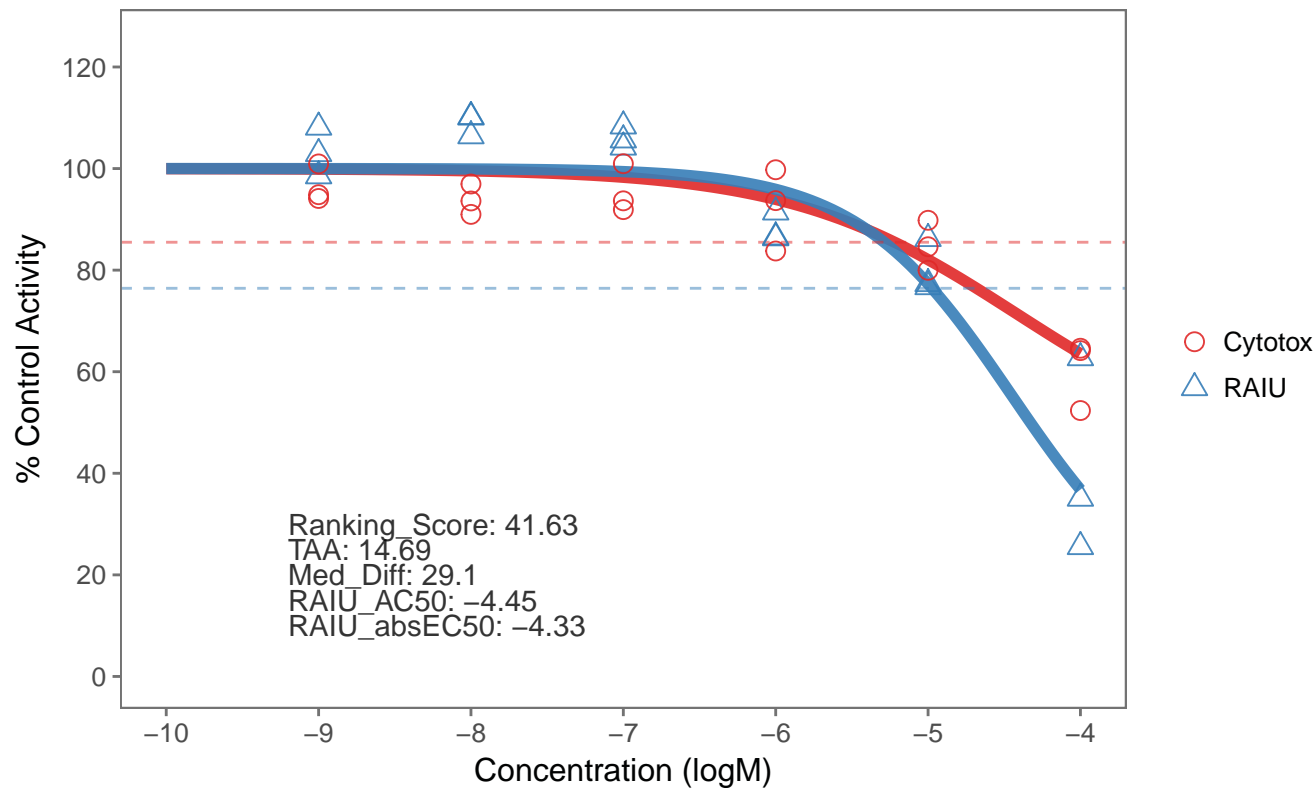



41. SPID: TP0001687C09  
NAME: 2,4-Bis(1-methyl-1-phenylethyl)phenol  
CAS NO: 2772-45-4

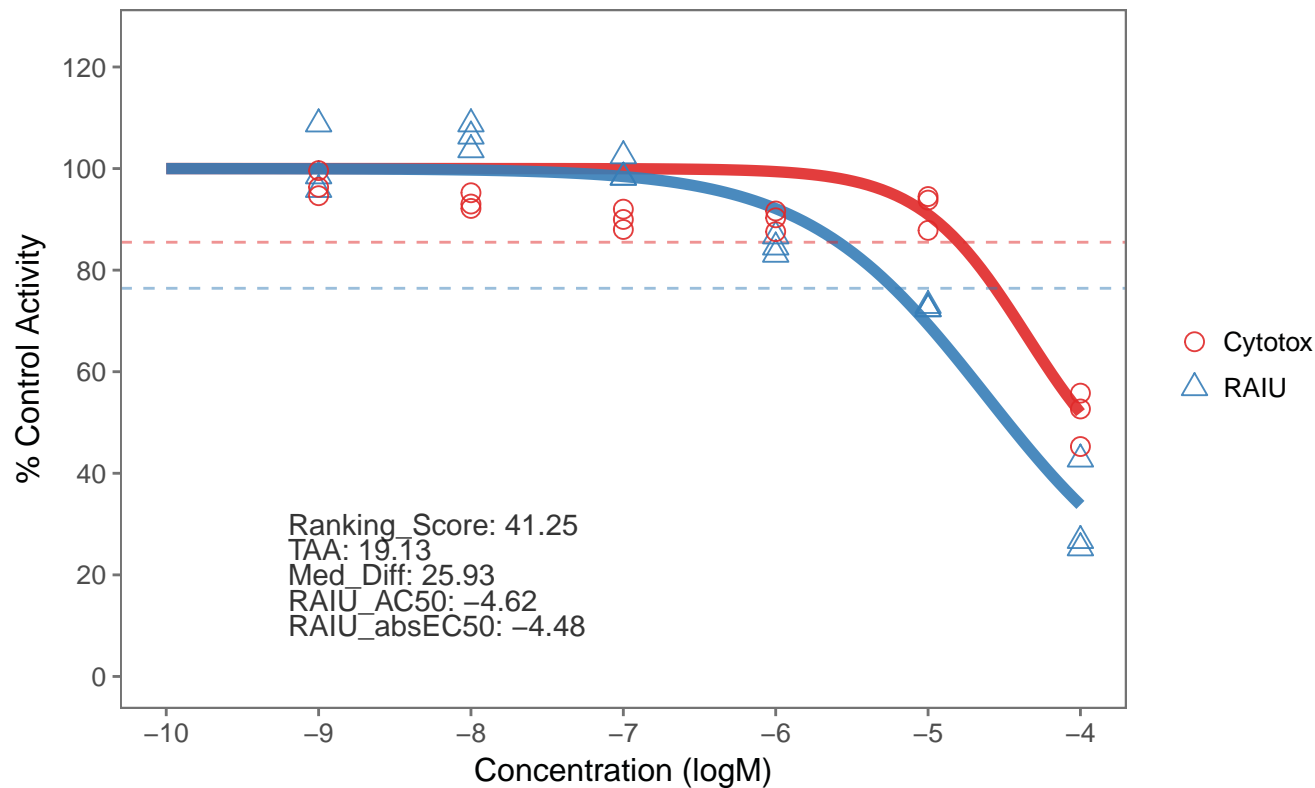

42. SPID: TP0001687E11  
NAME: 4,4'-Sulfonylbis[2-(prop-2-en-1-yl)phenol]  
CAS NO: 41481-66-7

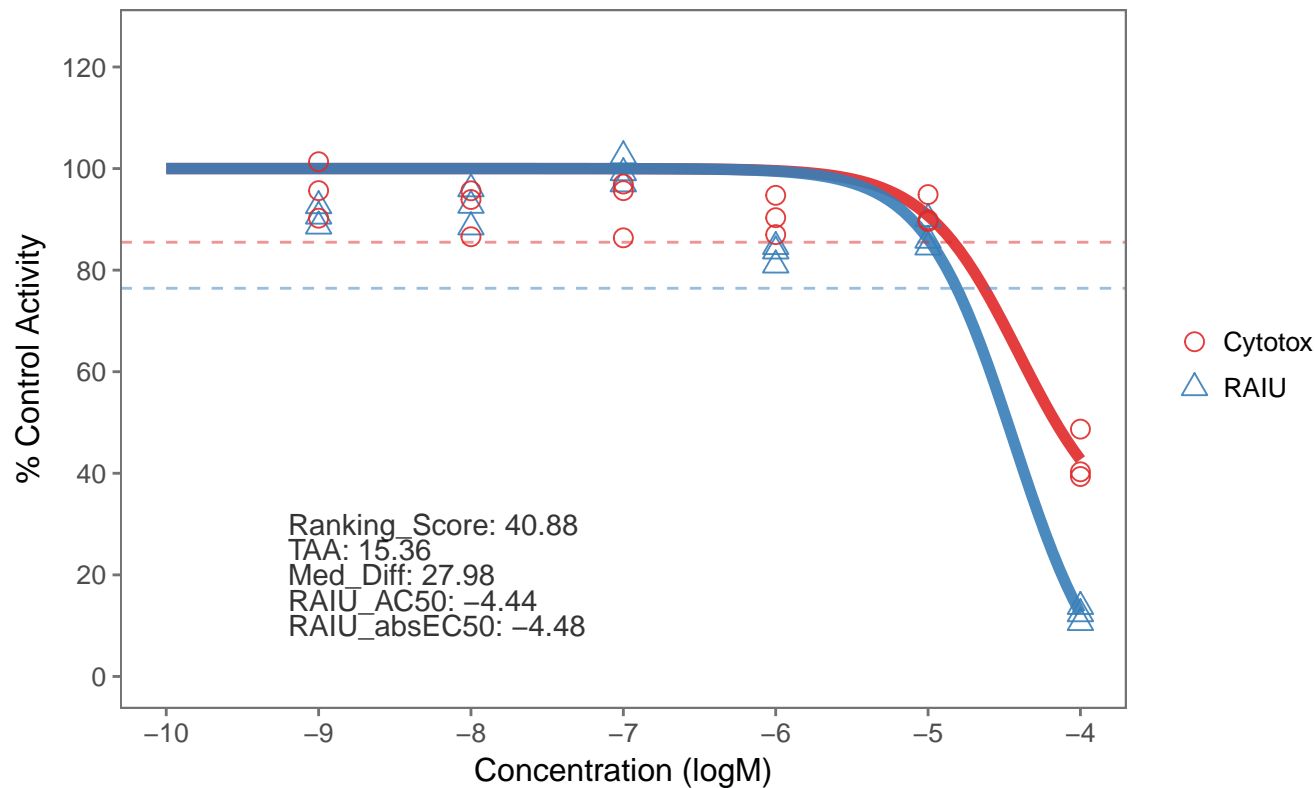

43. SPID: TP0001684A01

NAME: Picoxystrobin

CAS NO: 117428-22-5

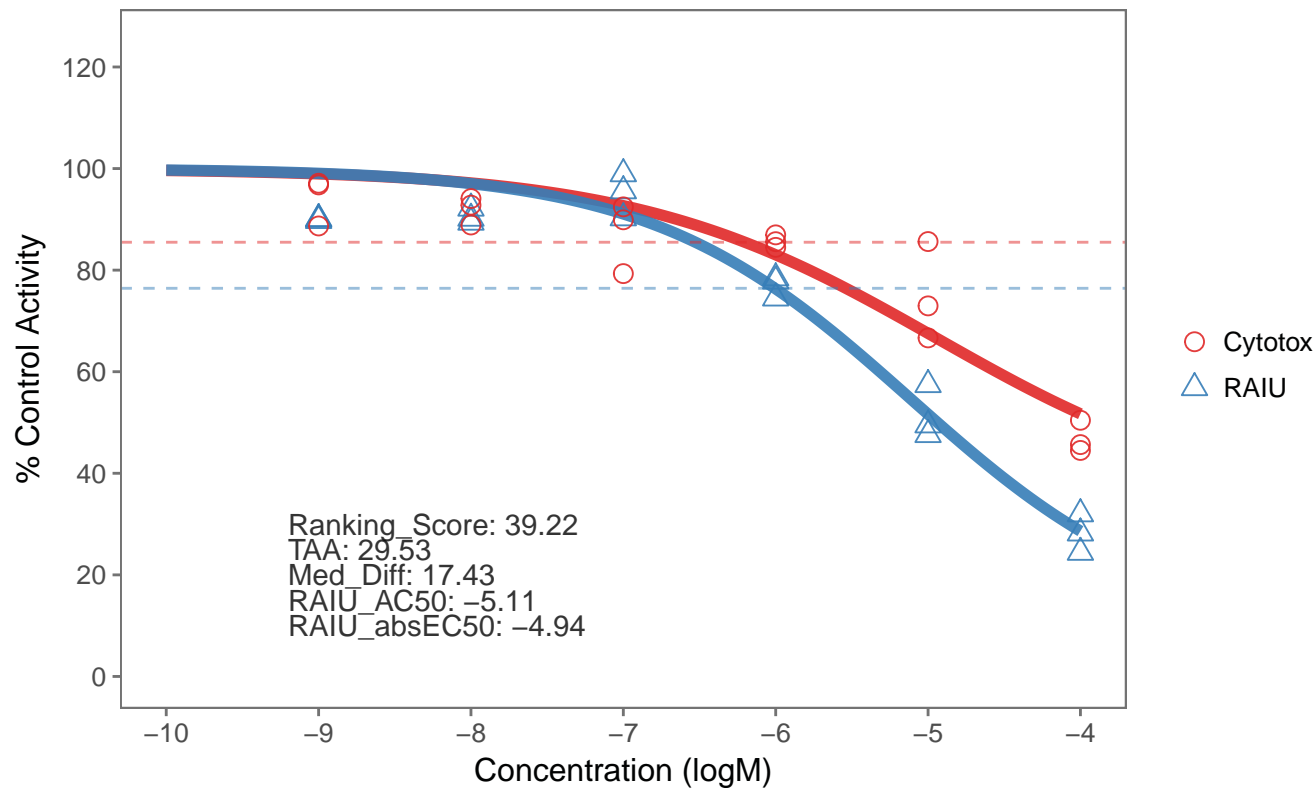

44. SPID: TP0001685E01  
NAME: Grinstad Soft-N-Safe  
CAS NO: NOCAS\_47394

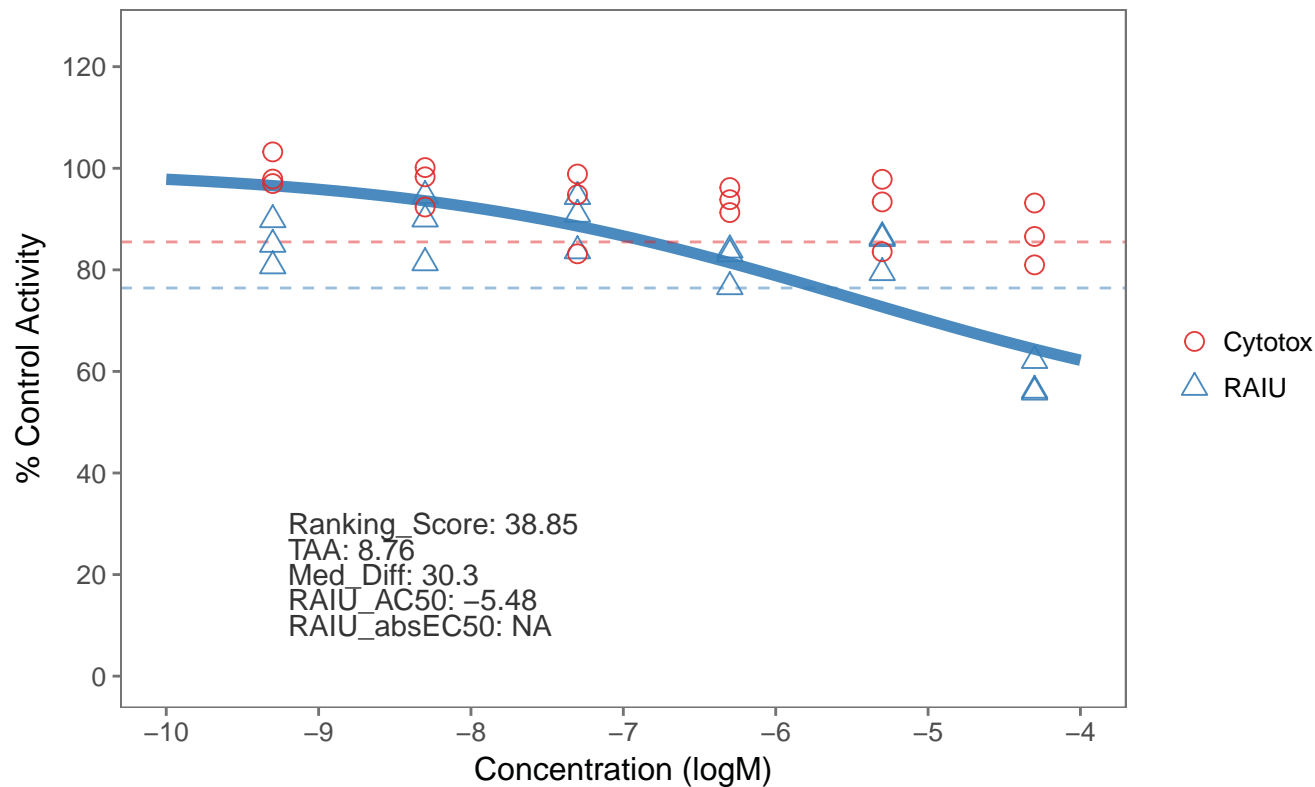

45. SPID: TP0001687D10

NAME: Phorate

CAS NO: 298-02-2

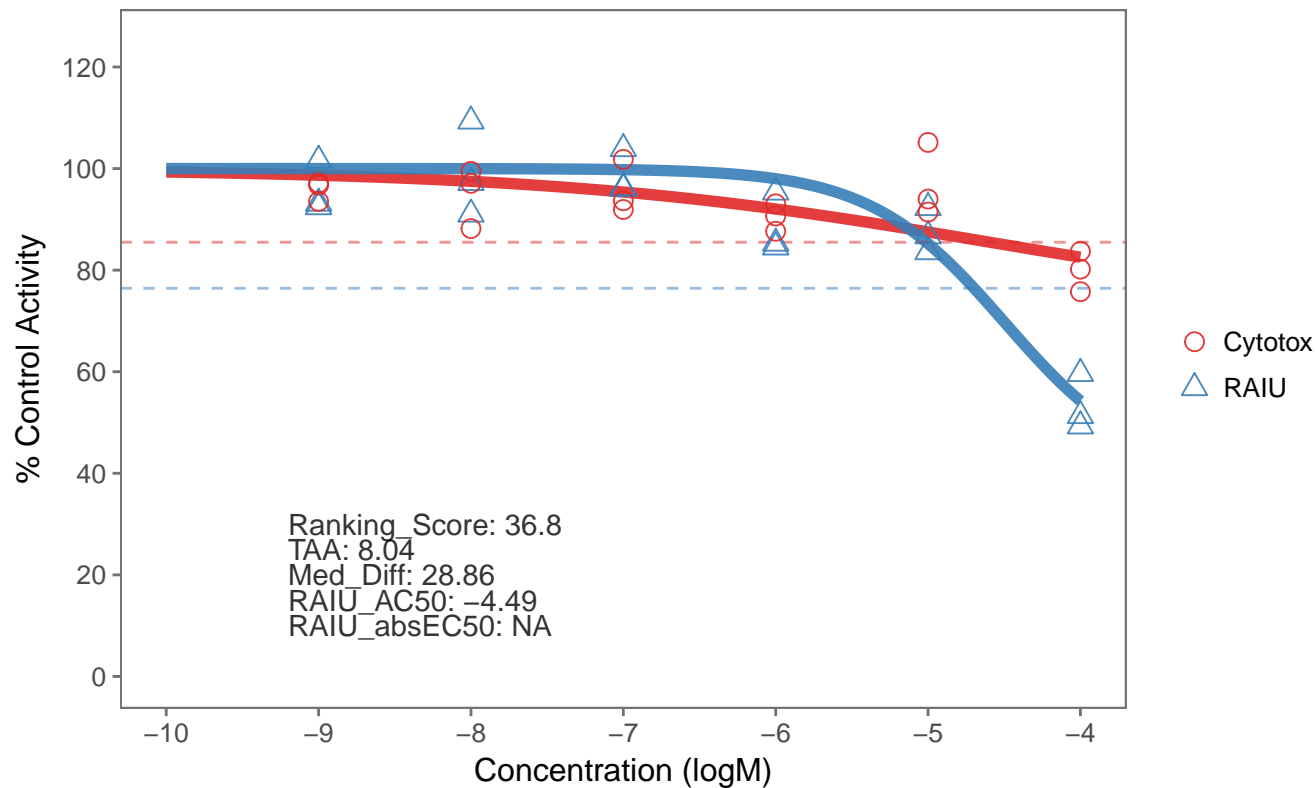

46. SPID: TP0001677F08  
NAME: Tiratricol  
CAS NO: 51-24-1

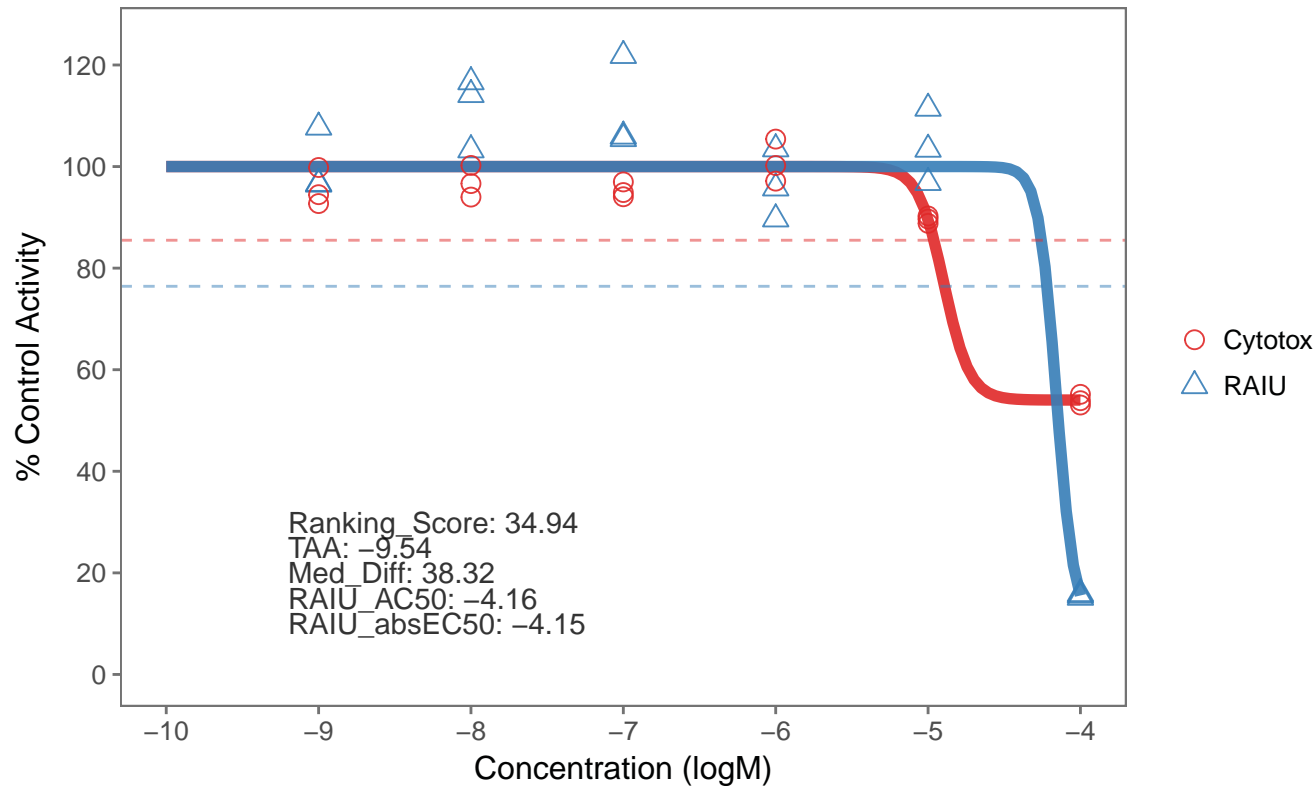

47. SPID: TP0001683B11  
NAME: Triethylene glycol bis(2-ethylhexanoate)  
CAS NO: 94-28-0

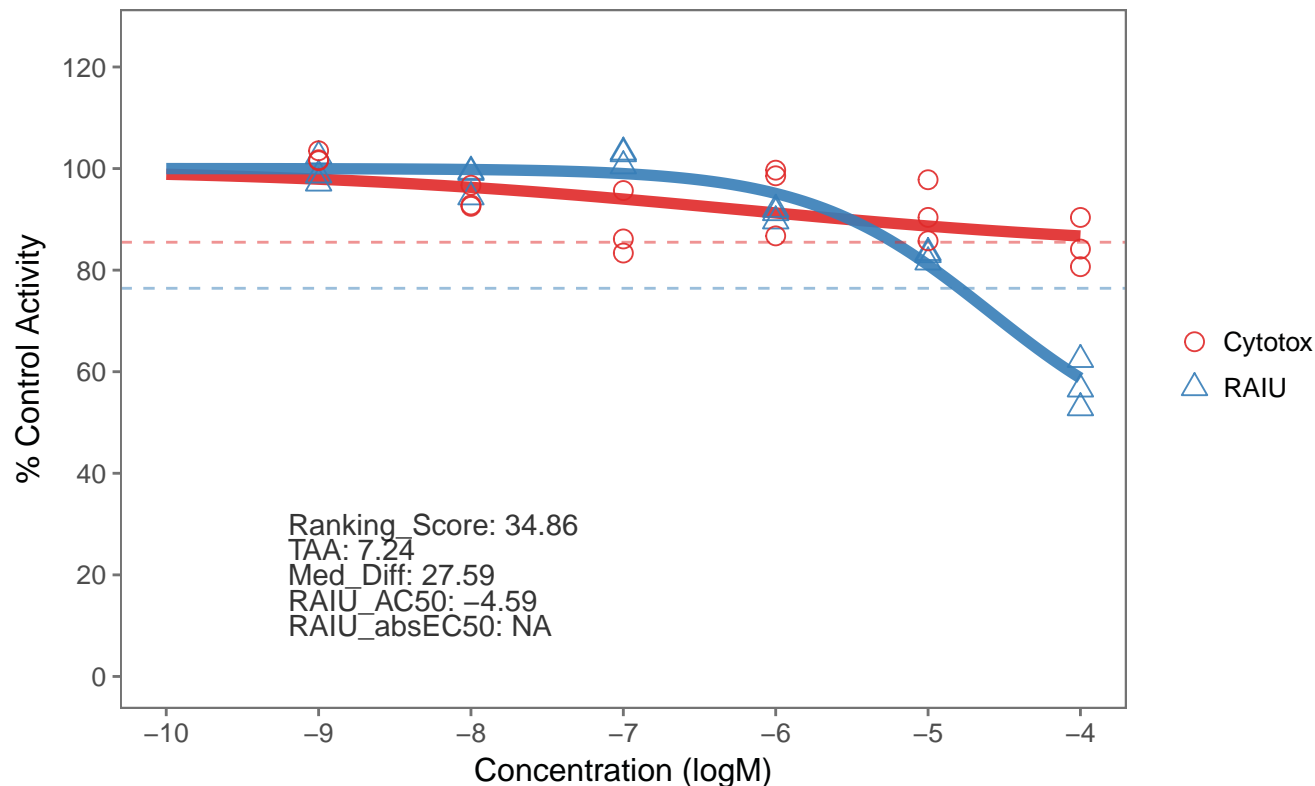

48. SPID: TP0001684G05  
NAME: CJ-013610  
CAS NO: 249296-43-3

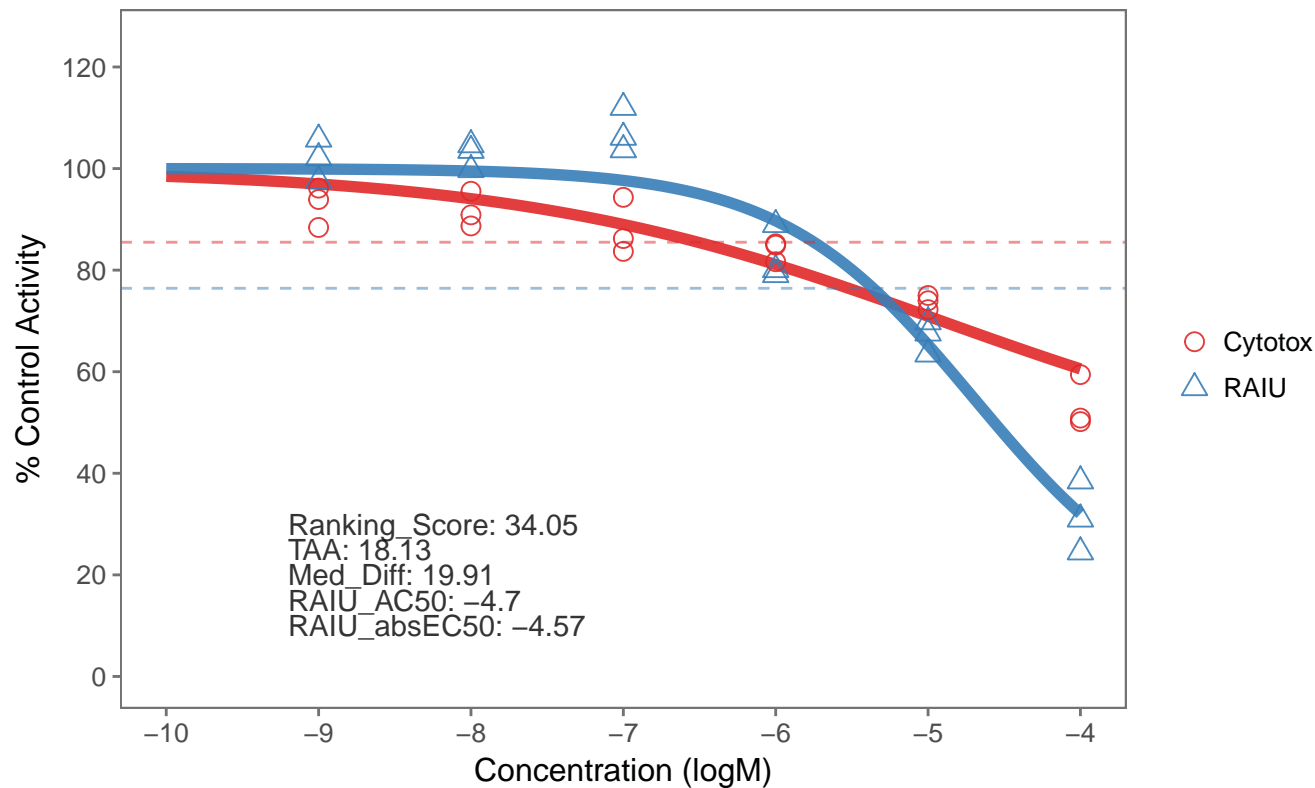



49. SPID: TP0001677F02

NAME: Triclosan

CAS NO: 3380-34-5

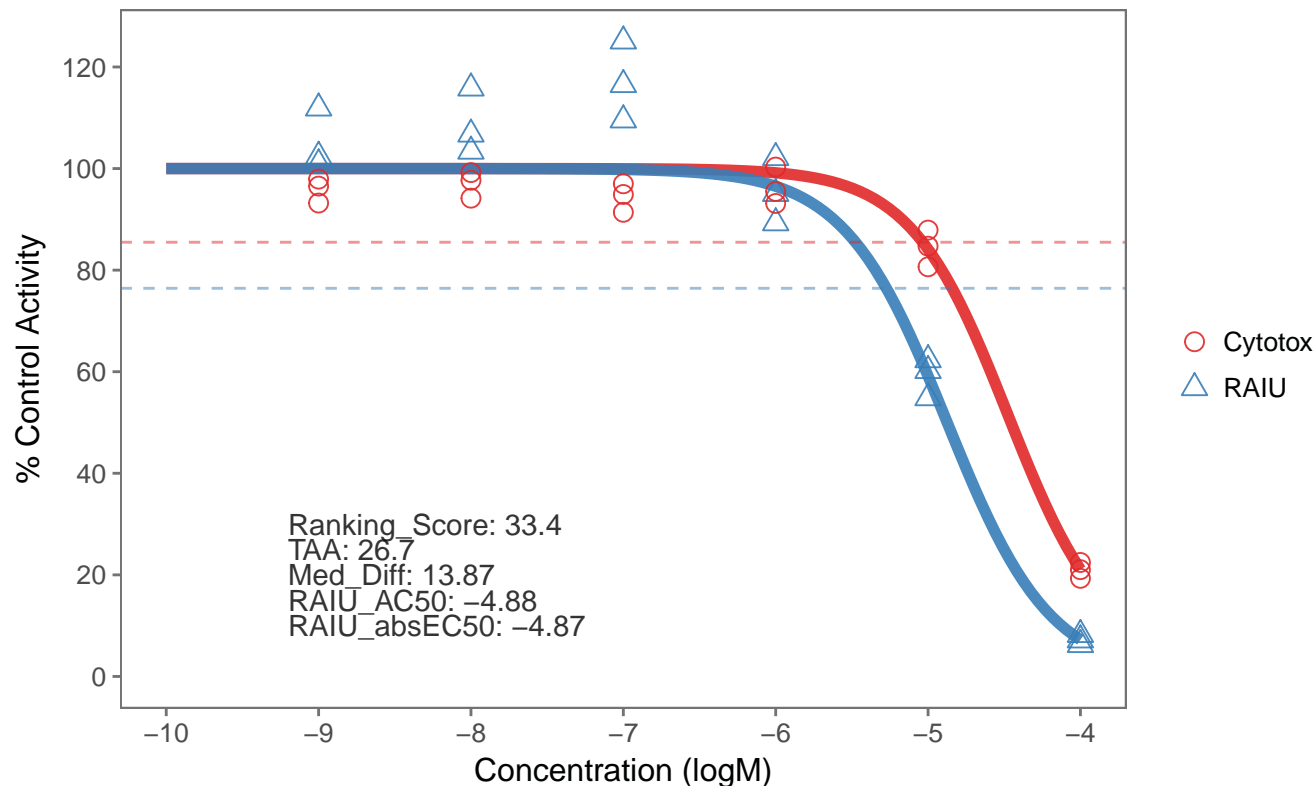

50. SPID: TP0001677B03

NAME: Sulfluramid

CAS NO: 4151-50-2

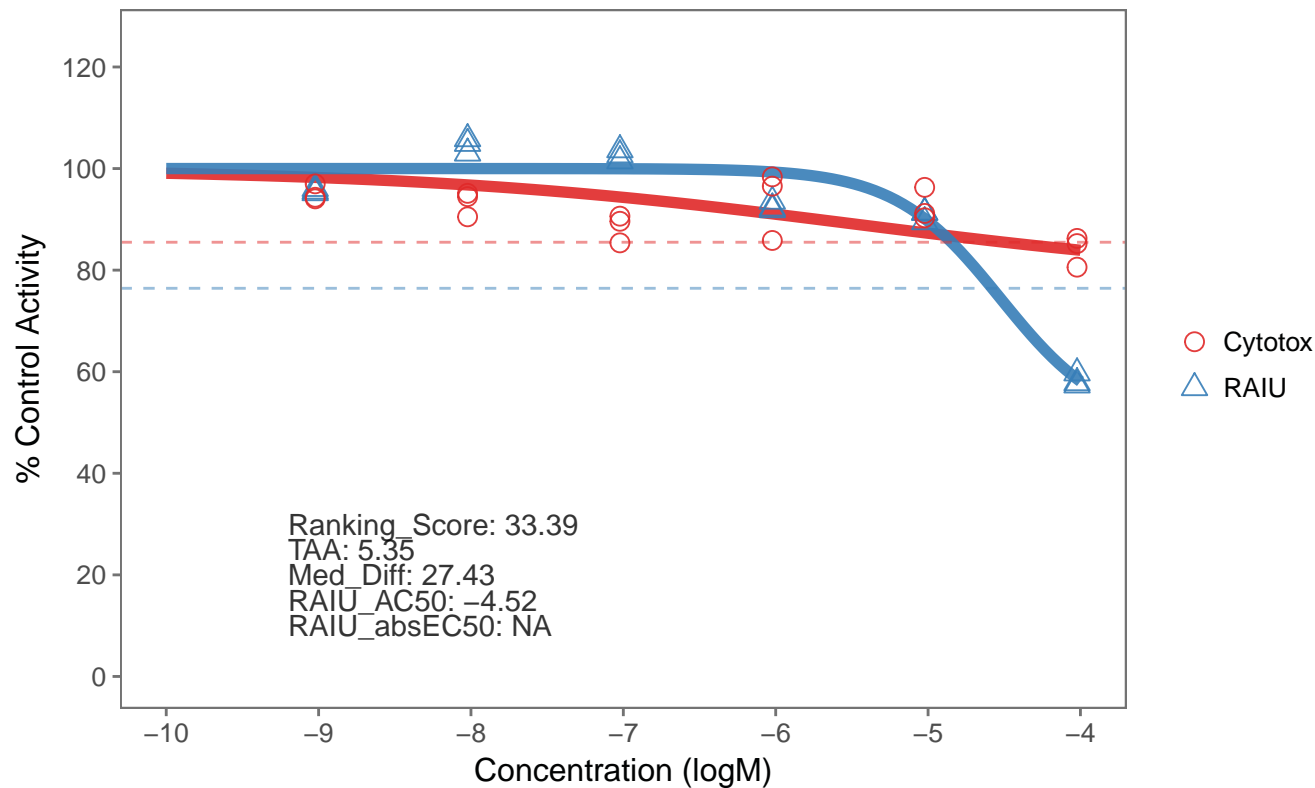

51. SPID: TP0001677G07  
NAME: TDCPP  
CAS NO: 13674-87-8

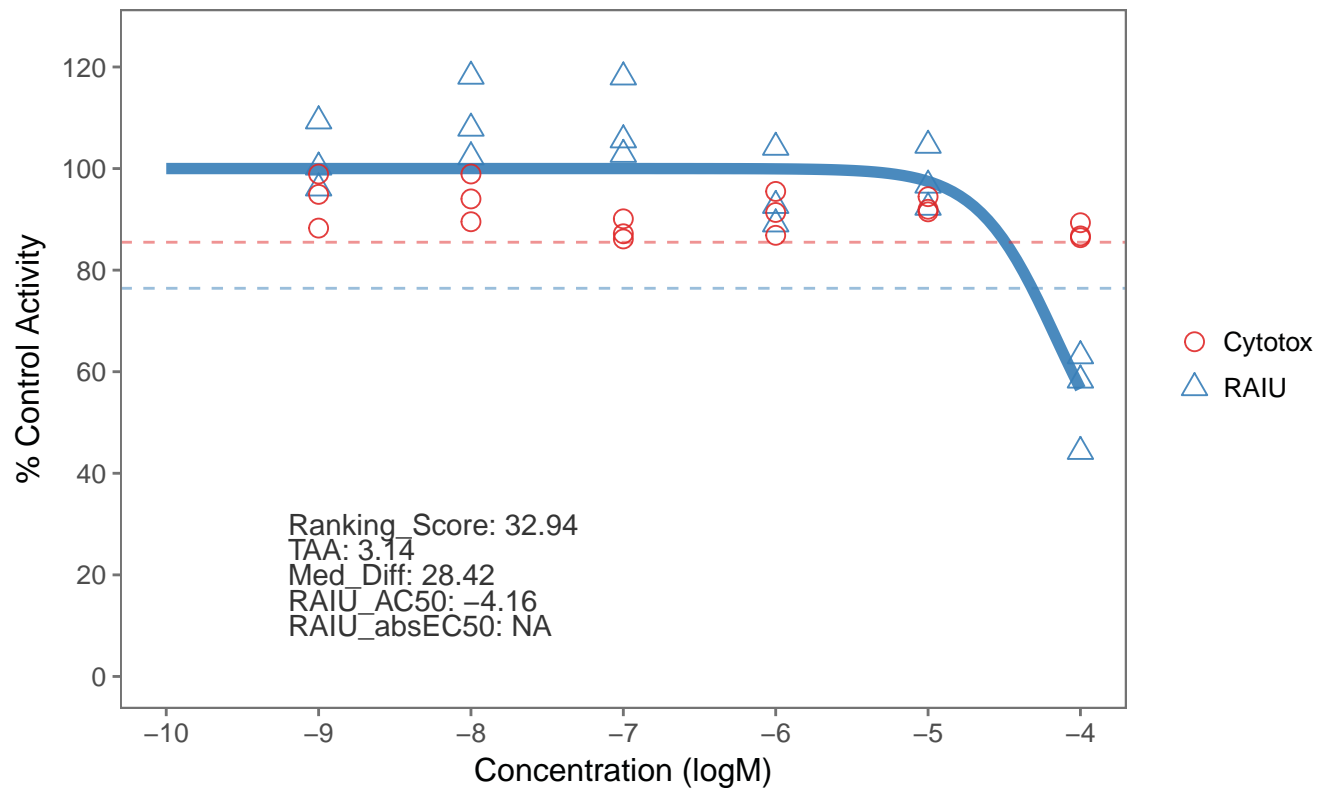

52. SPID: TP0001682B08  
NAME: Heptachlor  
CAS NO: 76-44-8

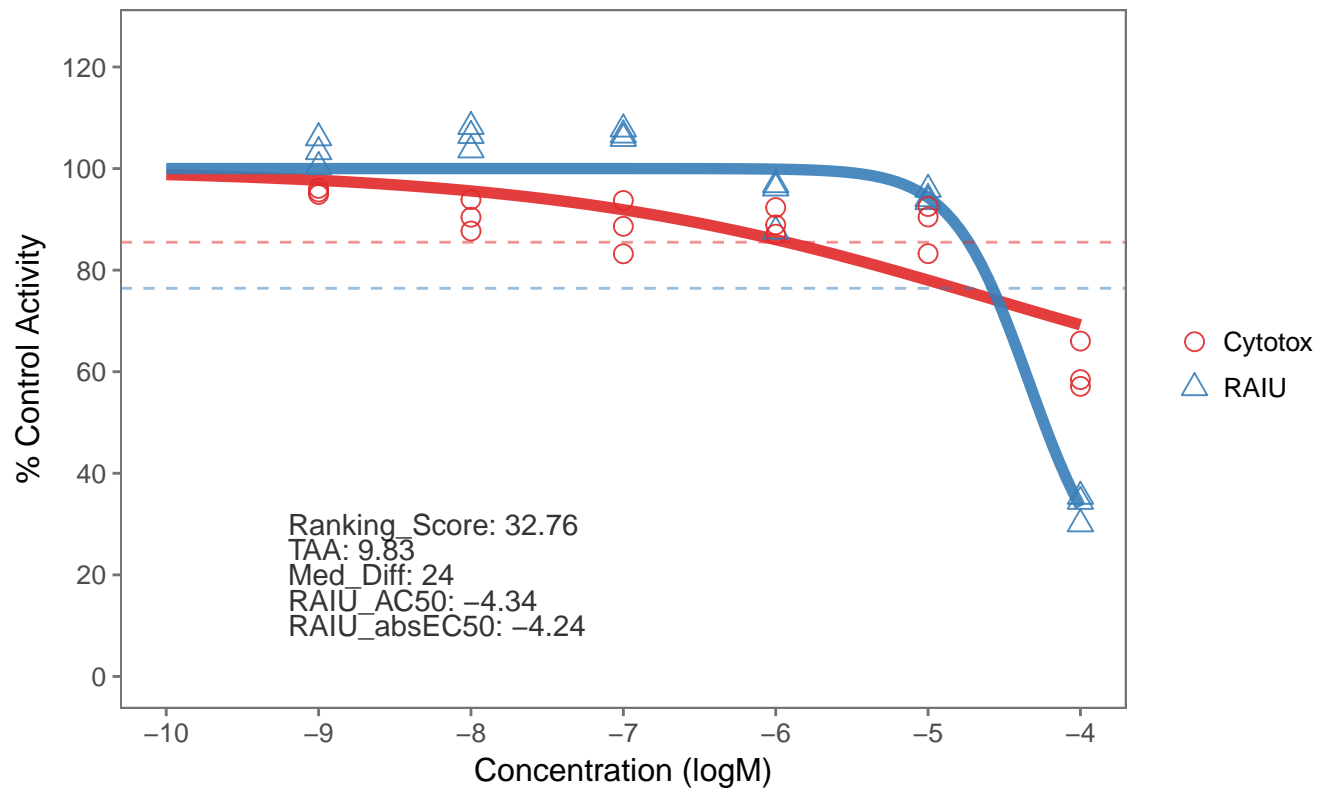

53. SPID: TP0001684F03  
NAME: Benzyl butyl phthalate  
CAS NO: 85-68-7

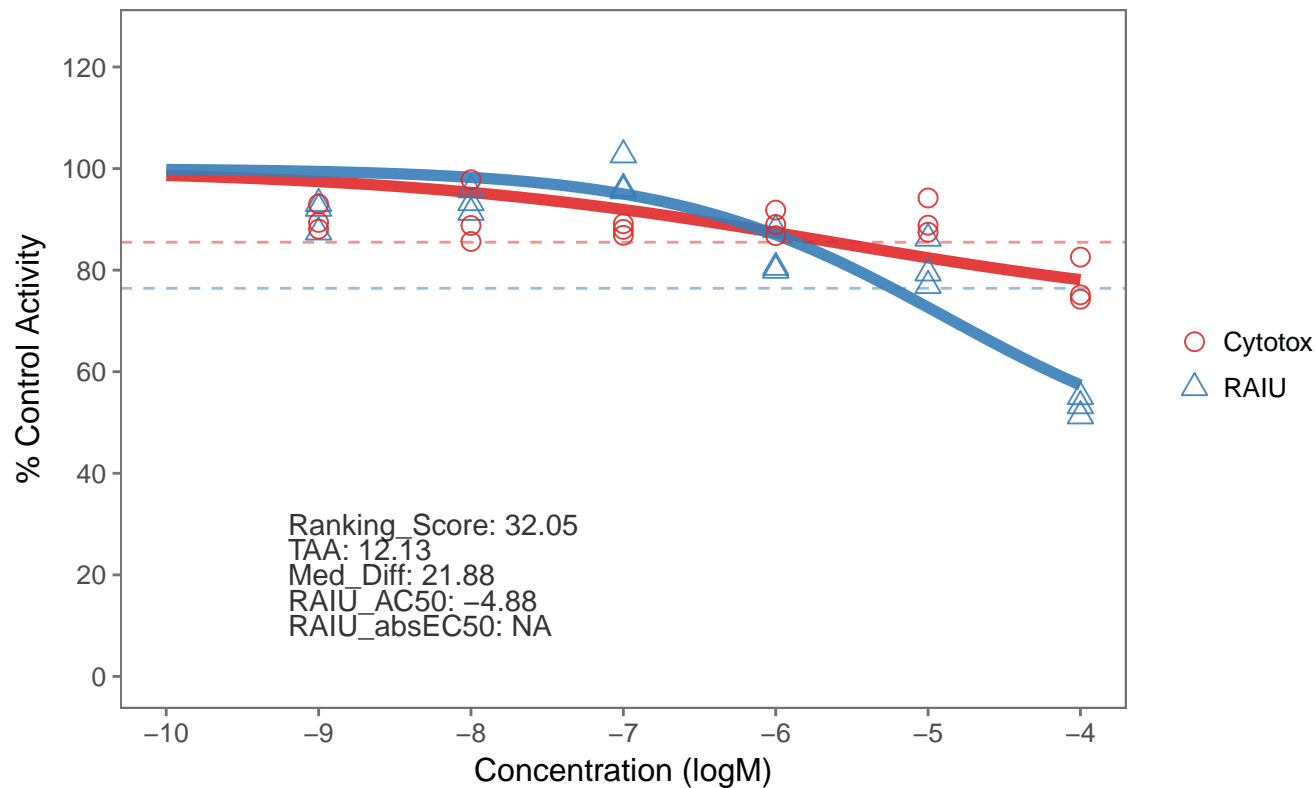

54. SPID: TP0001688B01  
NAME: Clotrimazole  
CAS NO: 23593-75-1

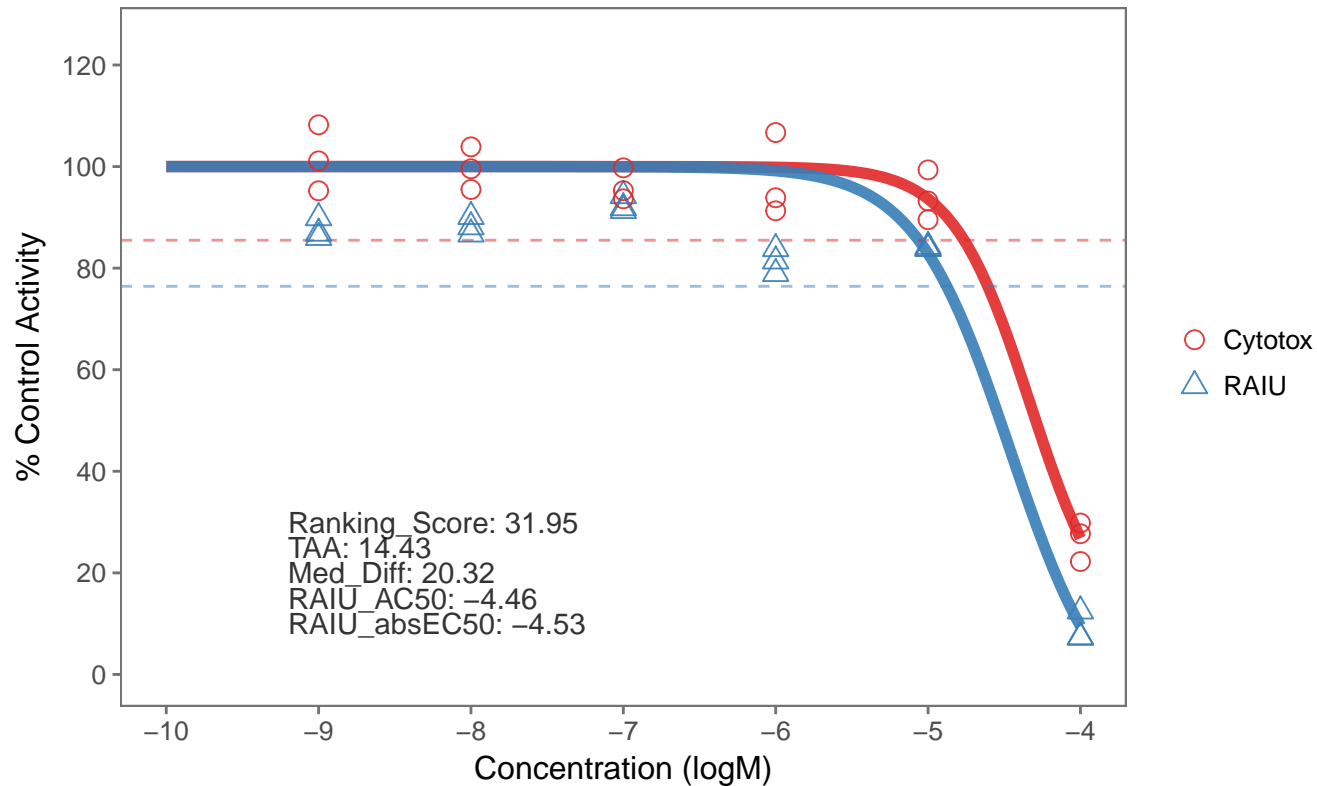

55. SPID: TP0001680C09  
NAME: 2,4-Di-tert-butylphenol  
CAS NO: 96-76-4

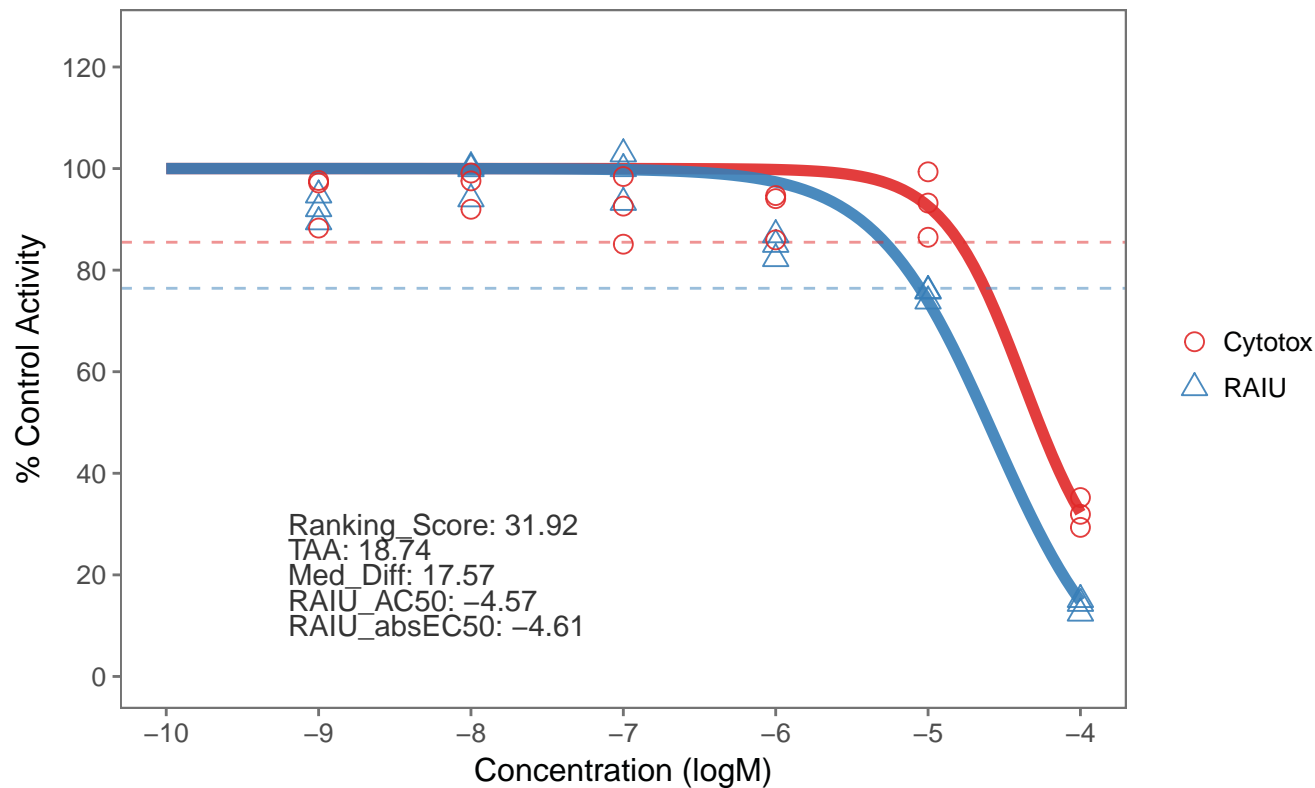

56. SPID: TP0001683C05  
NAME: Octhilinone  
CAS NO: 26530-20-1

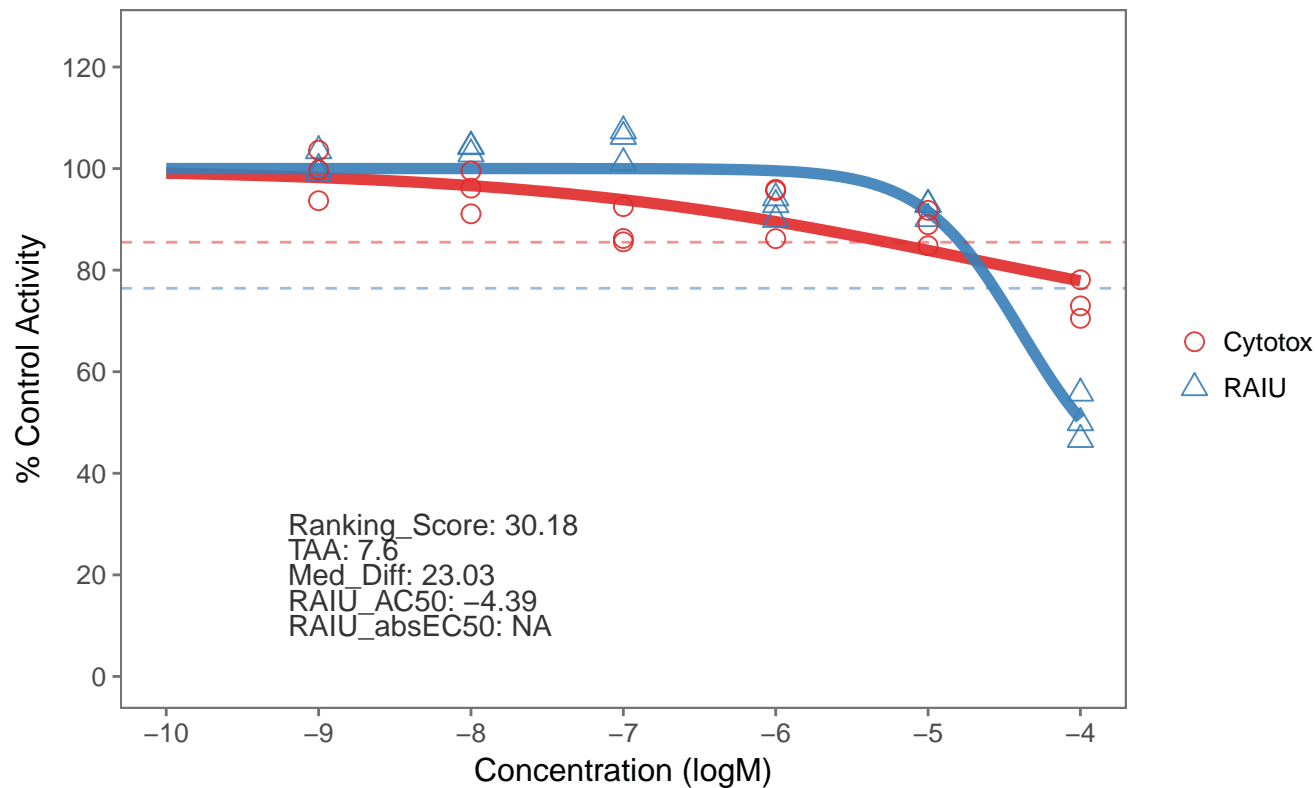



57. SPID: TP0001688E02  
NAME: Bisphenol B  
CAS NO: 77-40-7

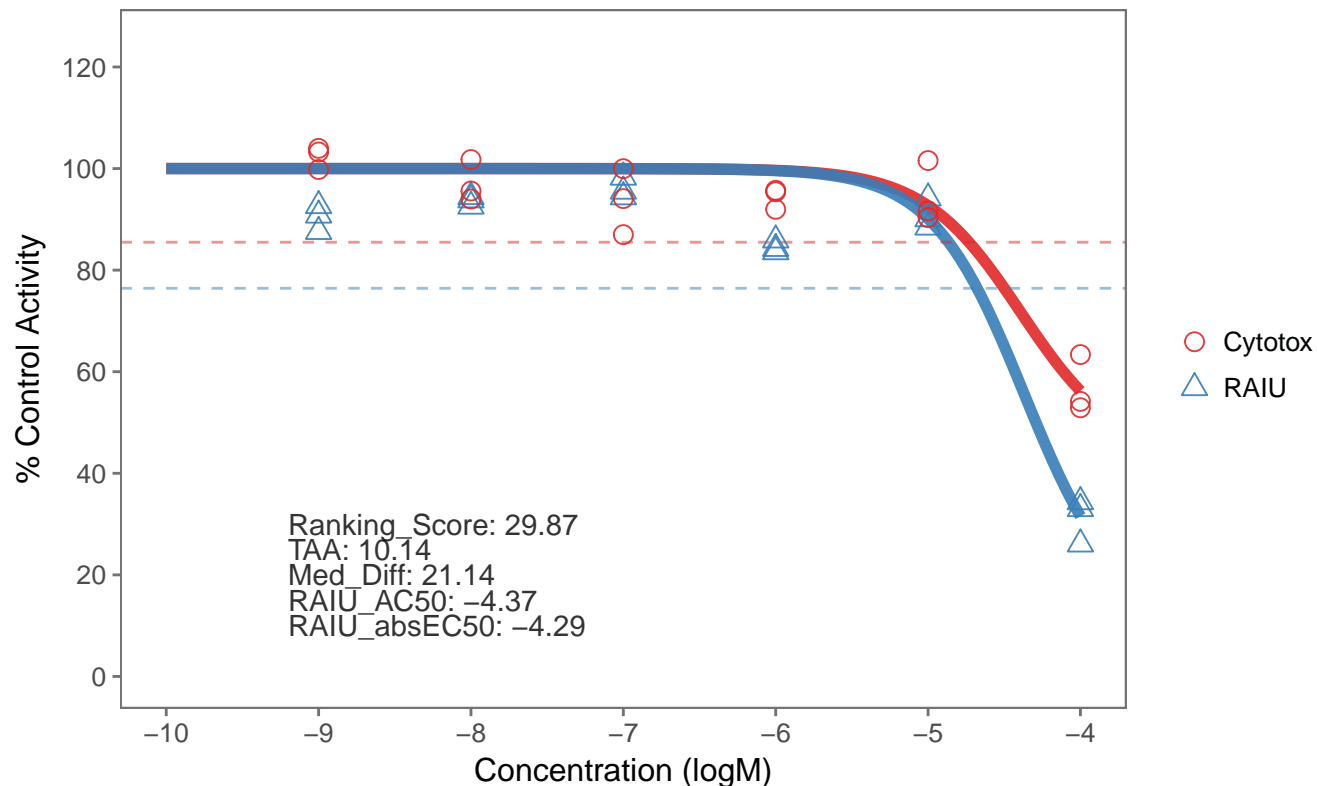

58. SPID: TP0001689D08

NAME: Farglitazar

CAS NO: 196808-45-4

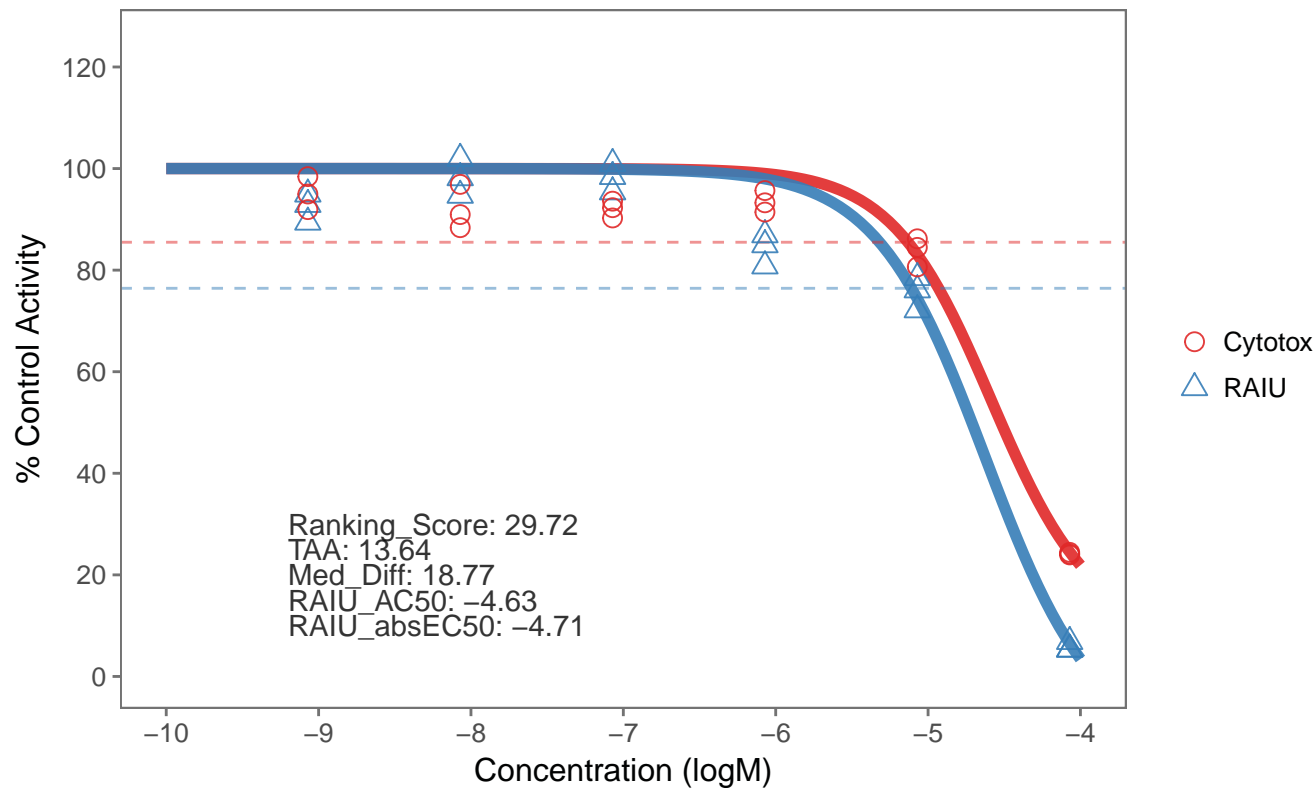

59. SPID: TP0001685F01

NAME: UK-337312

CAS NO: 203942-49-8

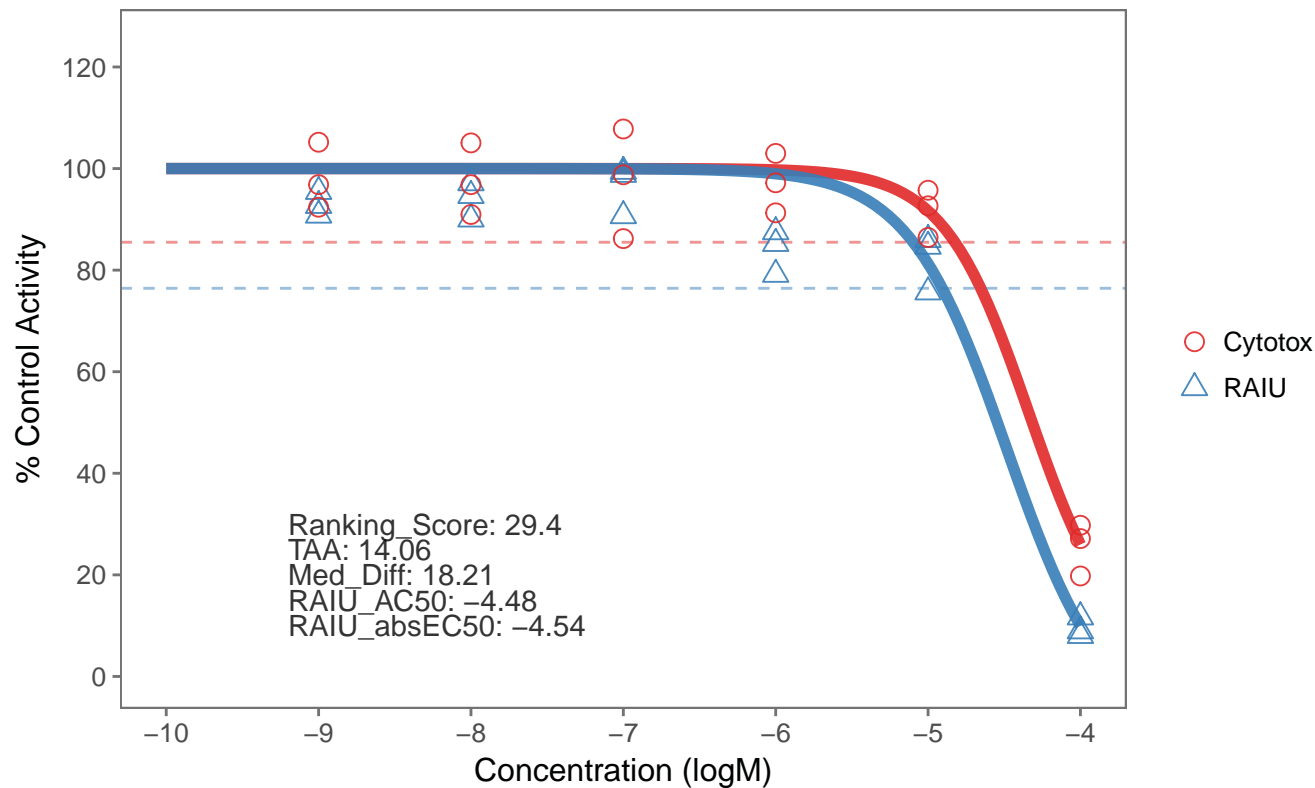

60. SPID: TP0001678E03

NAME: Phenolphthalin

CAS NO: 81-90-3

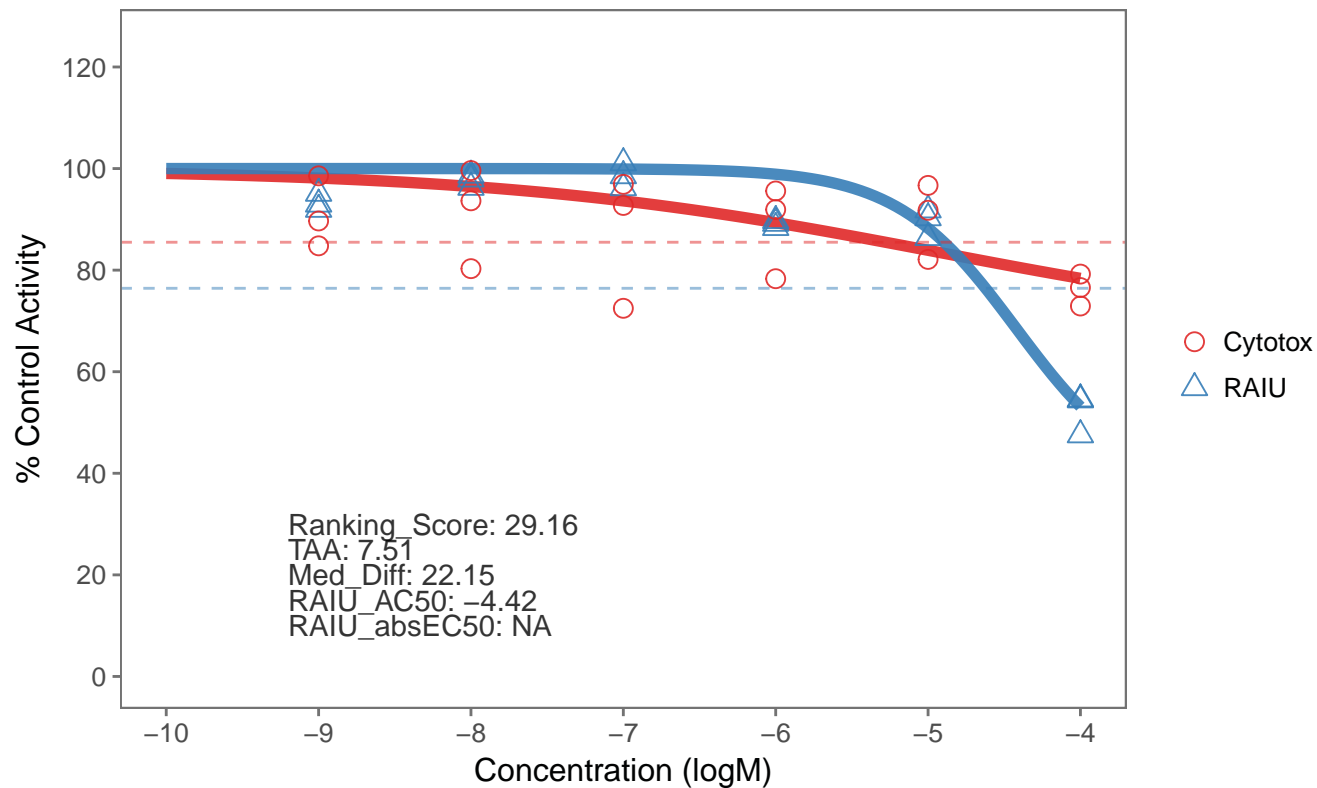

61. SPID: TP0001686C09  
NAME: all-trans-Retinoic acid  
CAS NO: 302-79-4

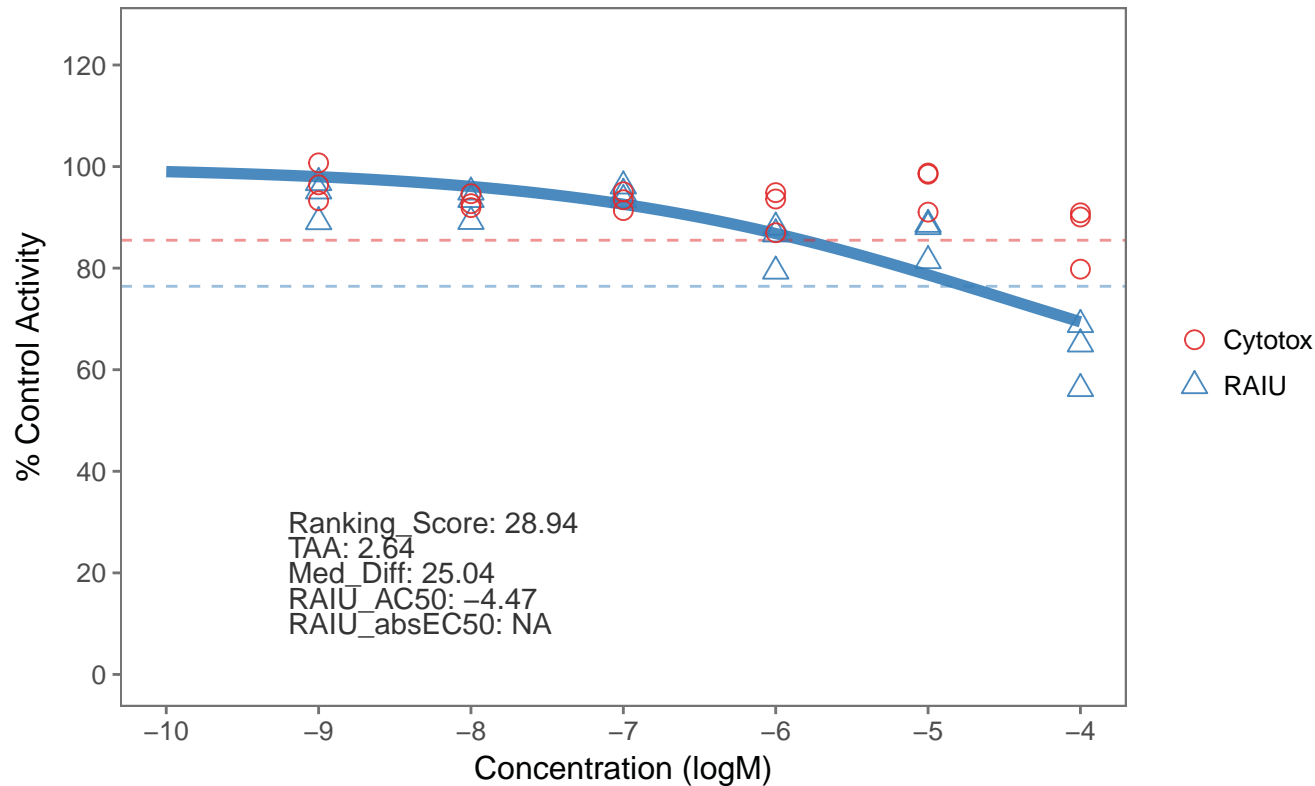

62. SPID: TP0001679B11  
NAME: Fabesetron hydrochloride  
CAS NO: 129299-90-7

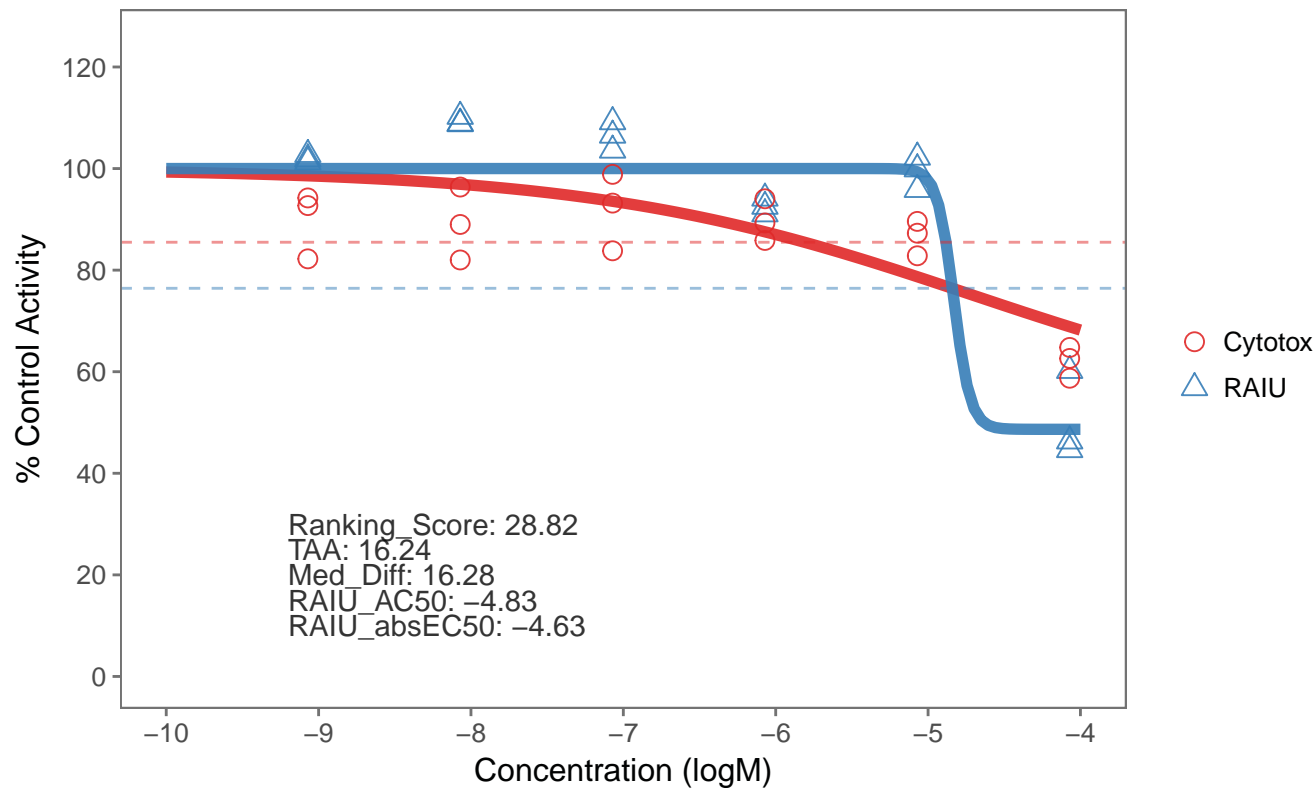

63. SPID: TP0001682D11  
NAME: PharmaGSID\_48511  
CAS NO: 1062243-51-9

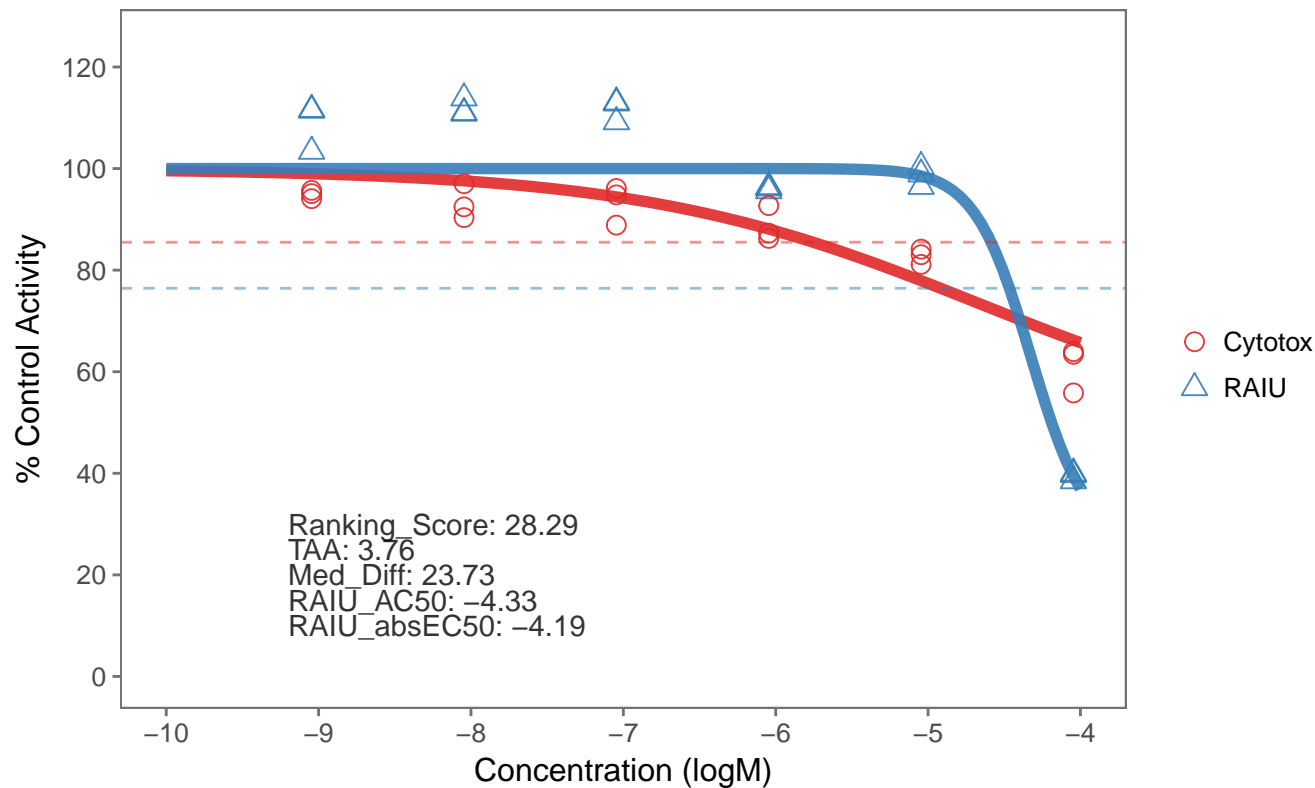

64. SPID: TP0001685B07  
NAME: Pentachlorophenol  
CAS NO: 87-86-5

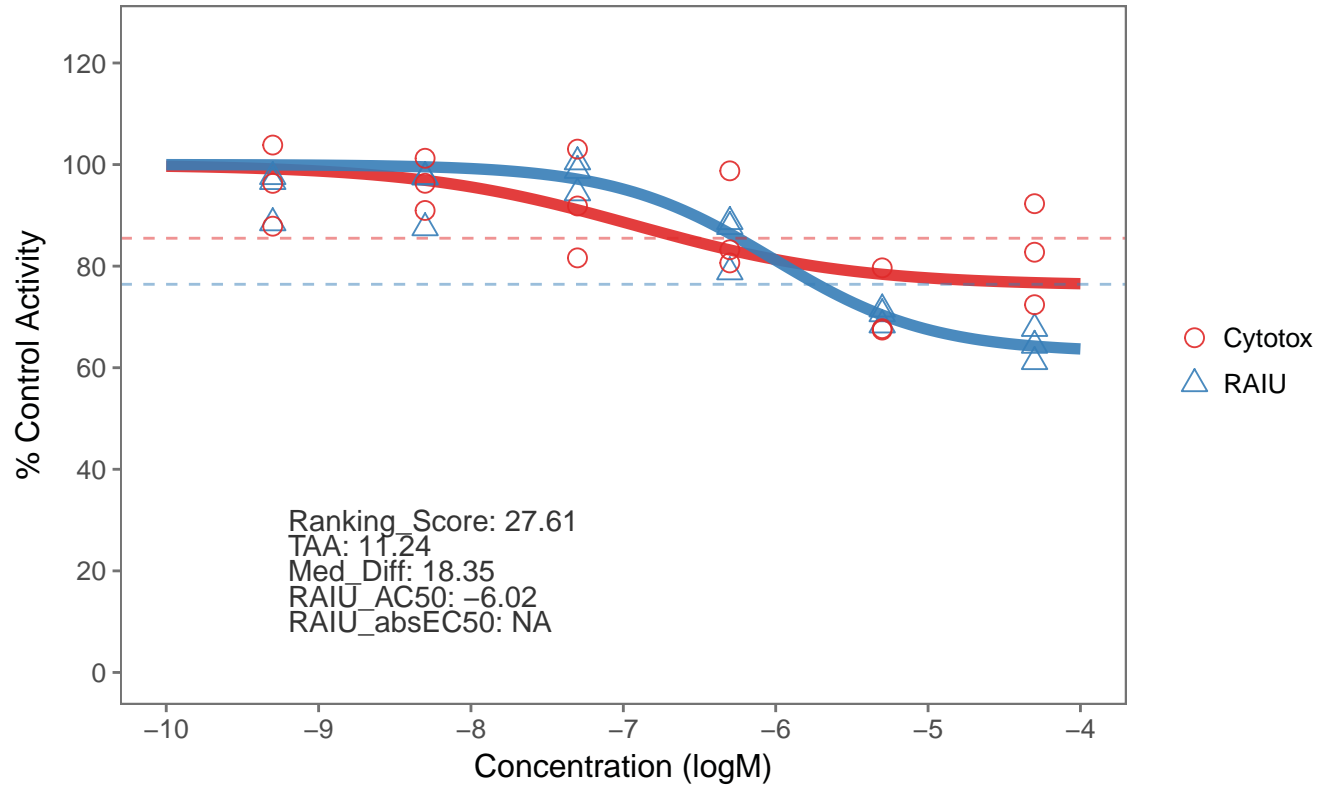



65. SPID: TP0001685G09  
NAME: 1-Dodecyl-2-pyrrolidinone  
CAS NO: 2687-96-9

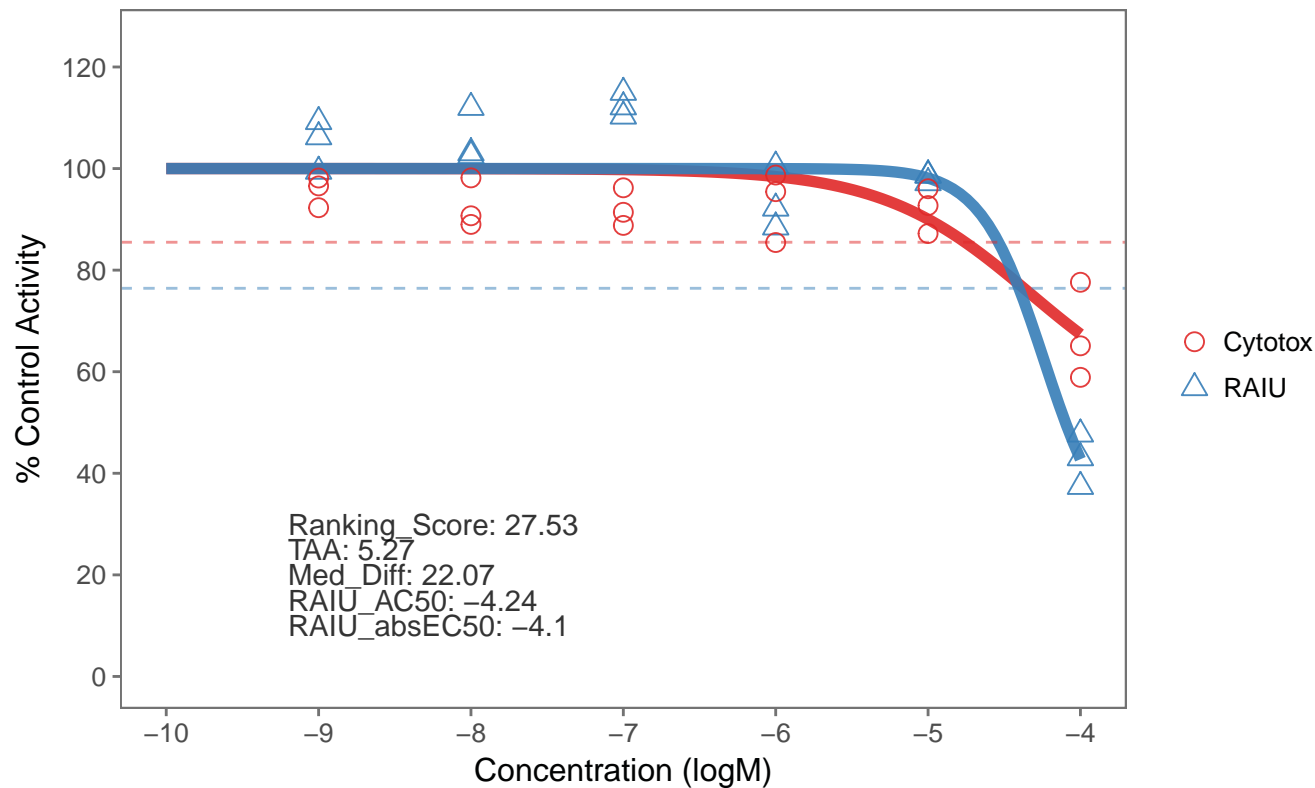

66. SPID: TP0001688D09

NAME: Chlorobenzilate

CAS NO: 510-15-6

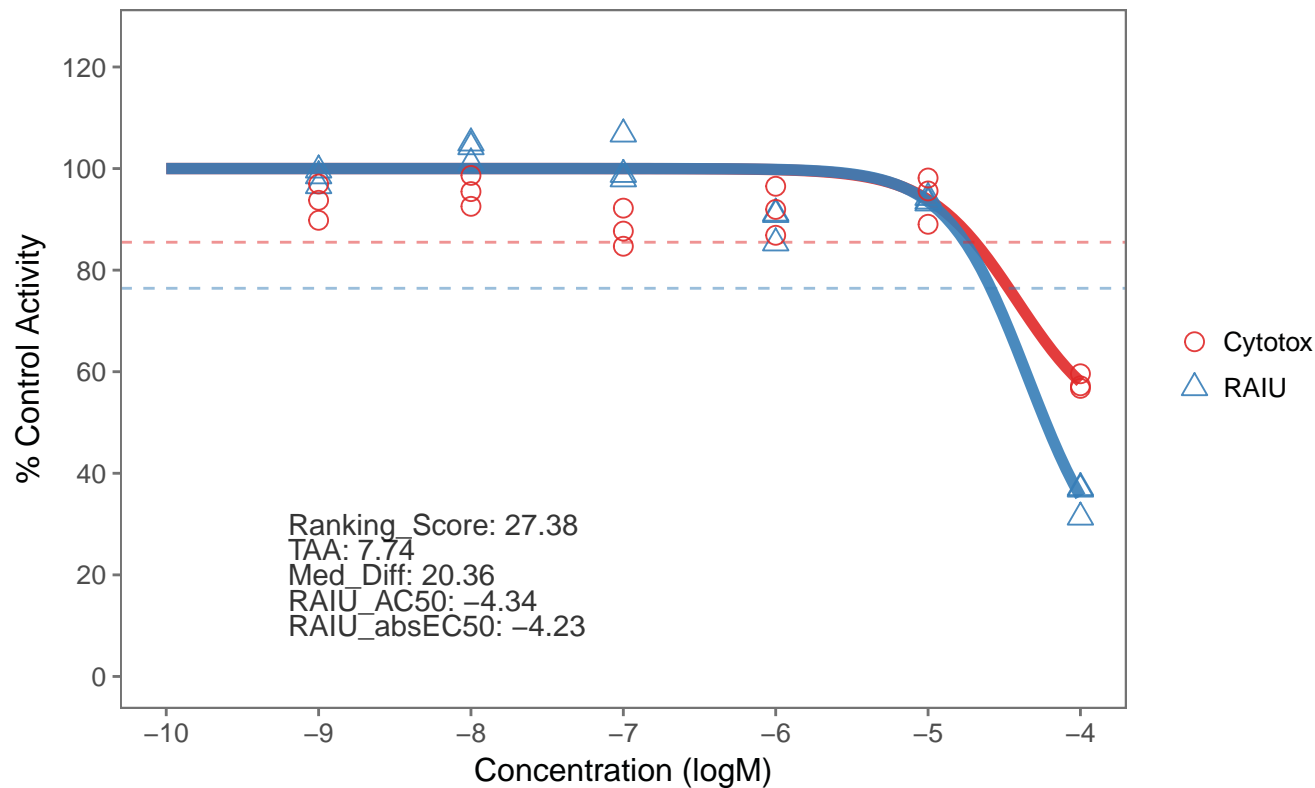

67. SPID: TP0001686E04  
NAME: PharmaGSID\_48505  
CAS NO: NOCAS\_48505

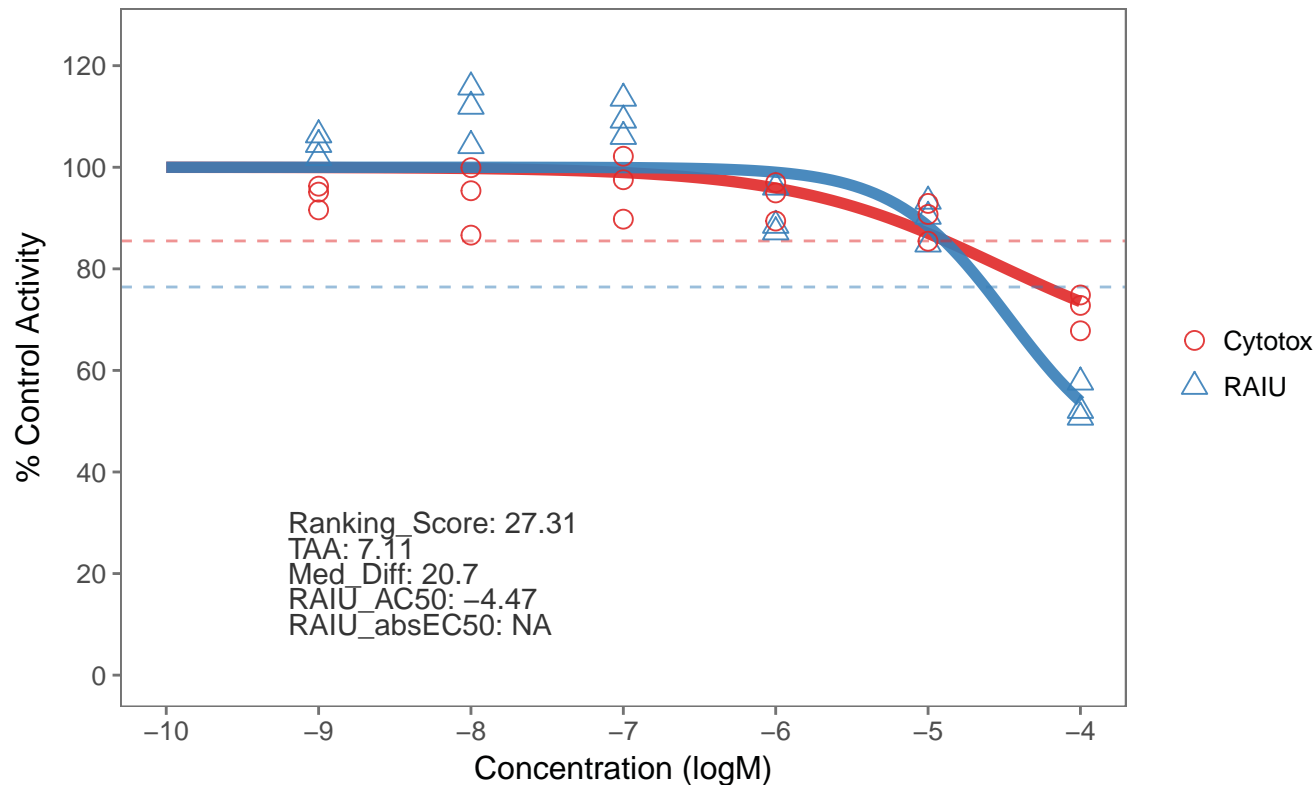

68. SPID: TP0001682B03  
NAME: 2-Methyl-4,6-dinitrophenol  
CAS NO: 534-52-1

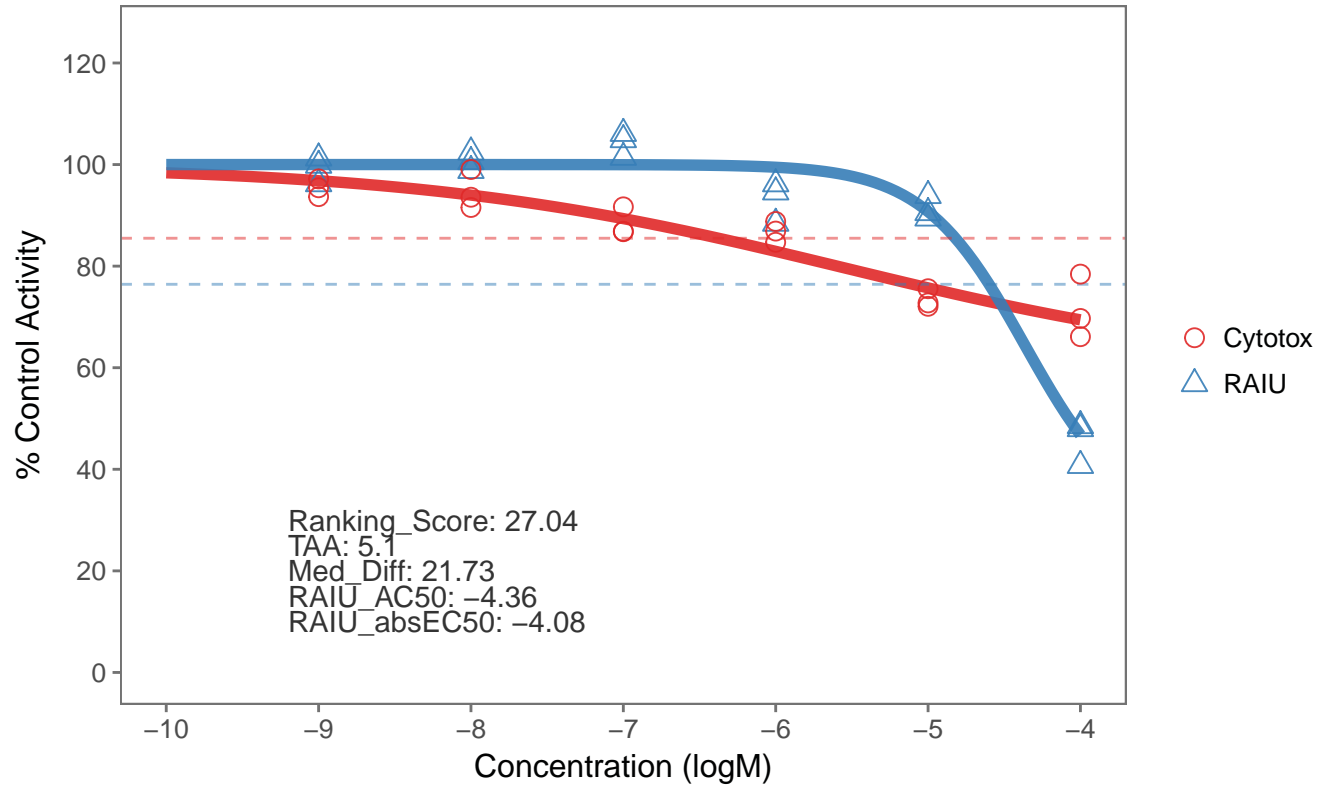

69. SPID: TP0001681B08

NAME: Triclosan

CAS NO: 3380-34-5

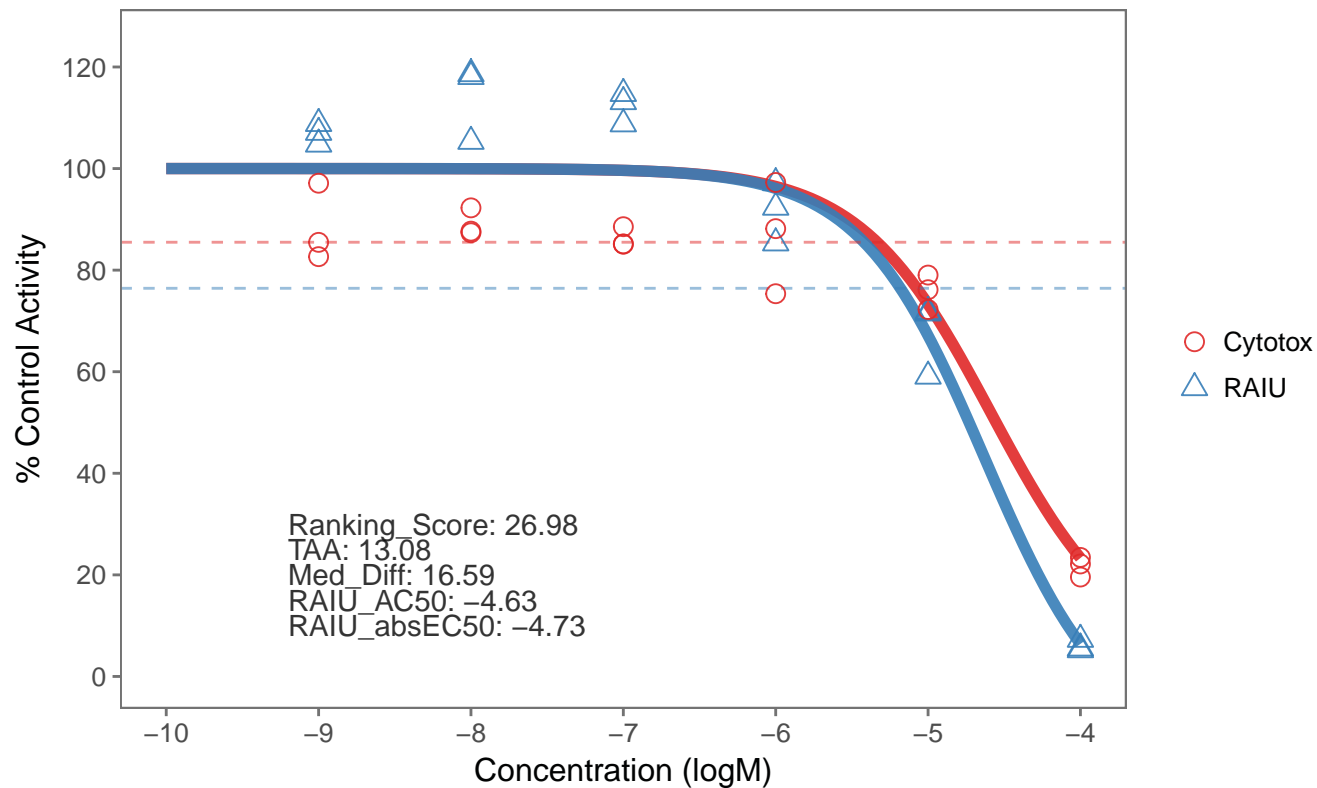

70. SPID: TP0001681B07

NAME: CP-105696

CAS NO: 158081-99-3

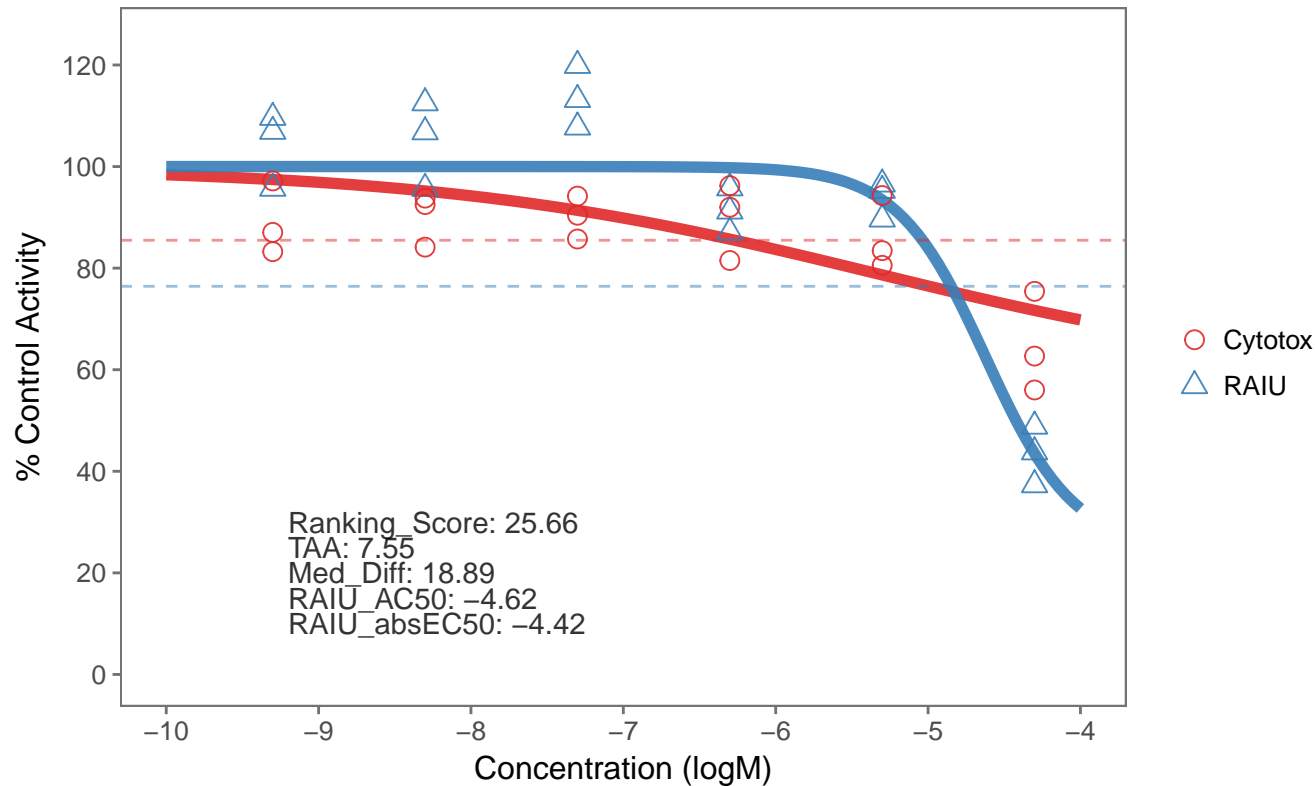

71. SPID: TP0001688D01

NAME: Besonprodil

CAS NO: 253450-09-8

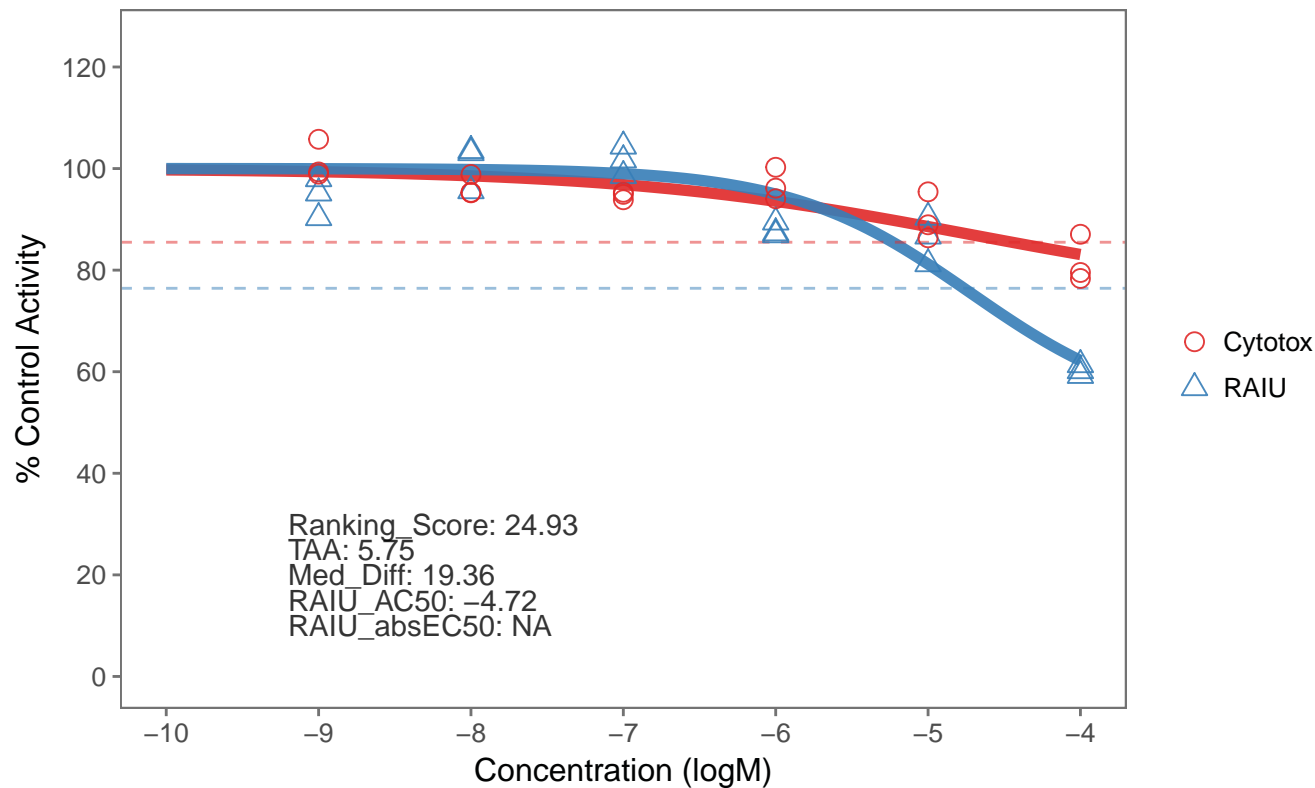

72. SPID: TP0001688D07  
NAME: Dodecylbenzenesulfonic acid  
CAS NO: 27176-87-0

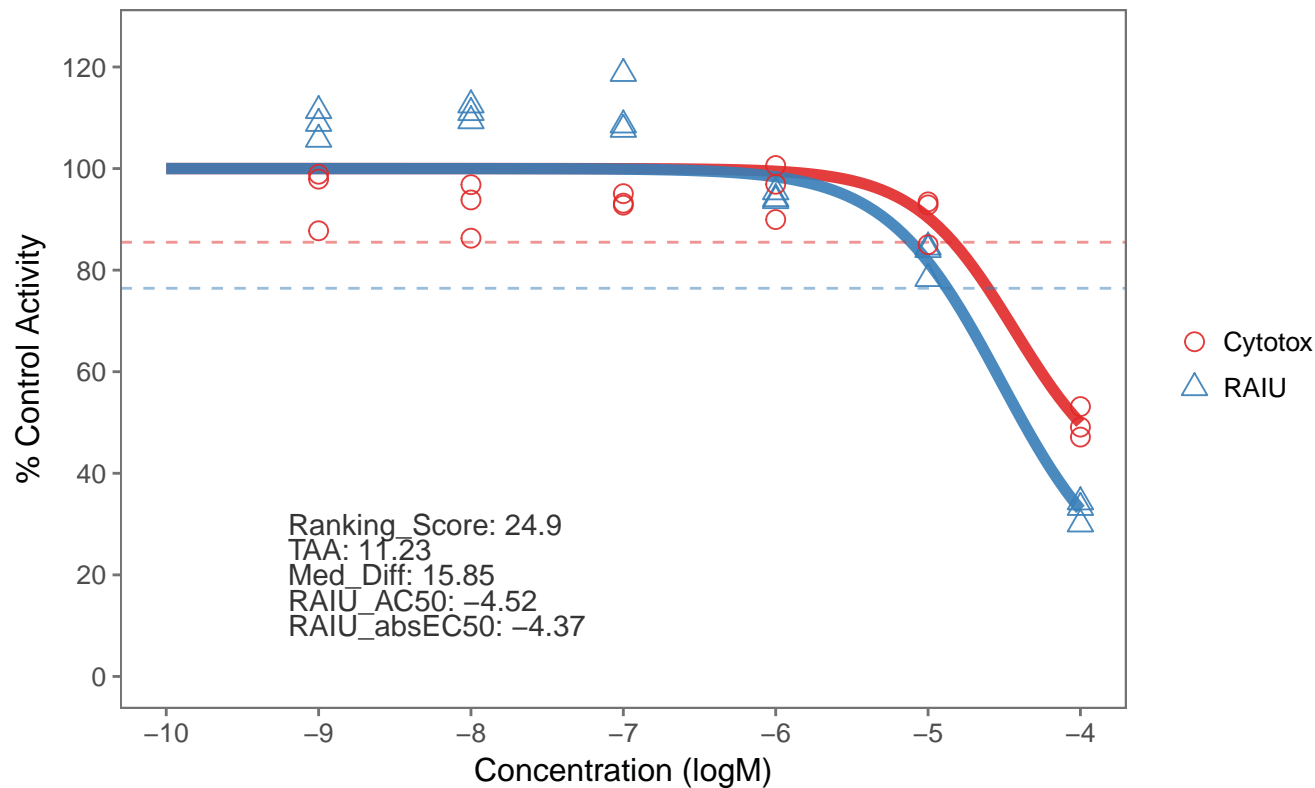



73. SPID: TP0001682D03  
NAME: Chlordane  
CAS NO: 57-74-9

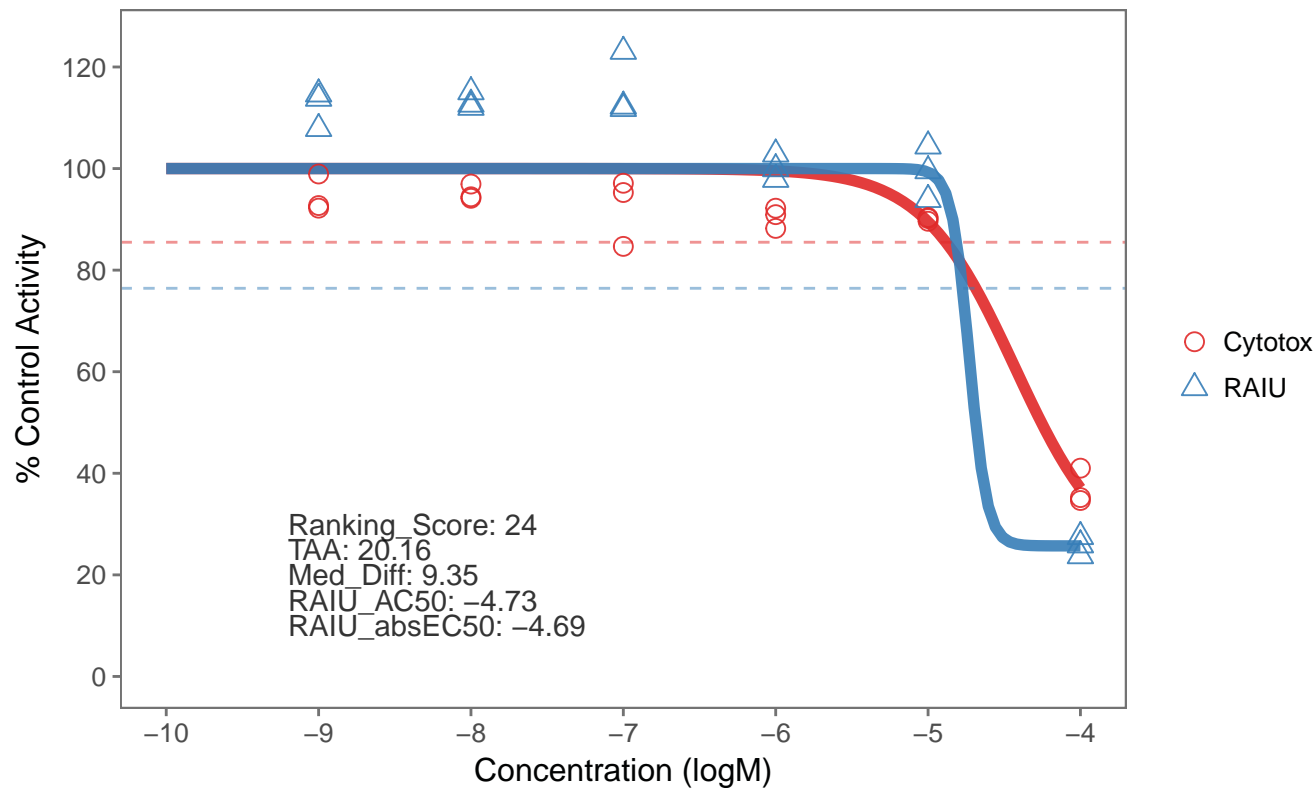

74. SPID: TP0001682E08  
NAME: 4-Hydroxytamoxifen  
CAS NO: 68392-35-8

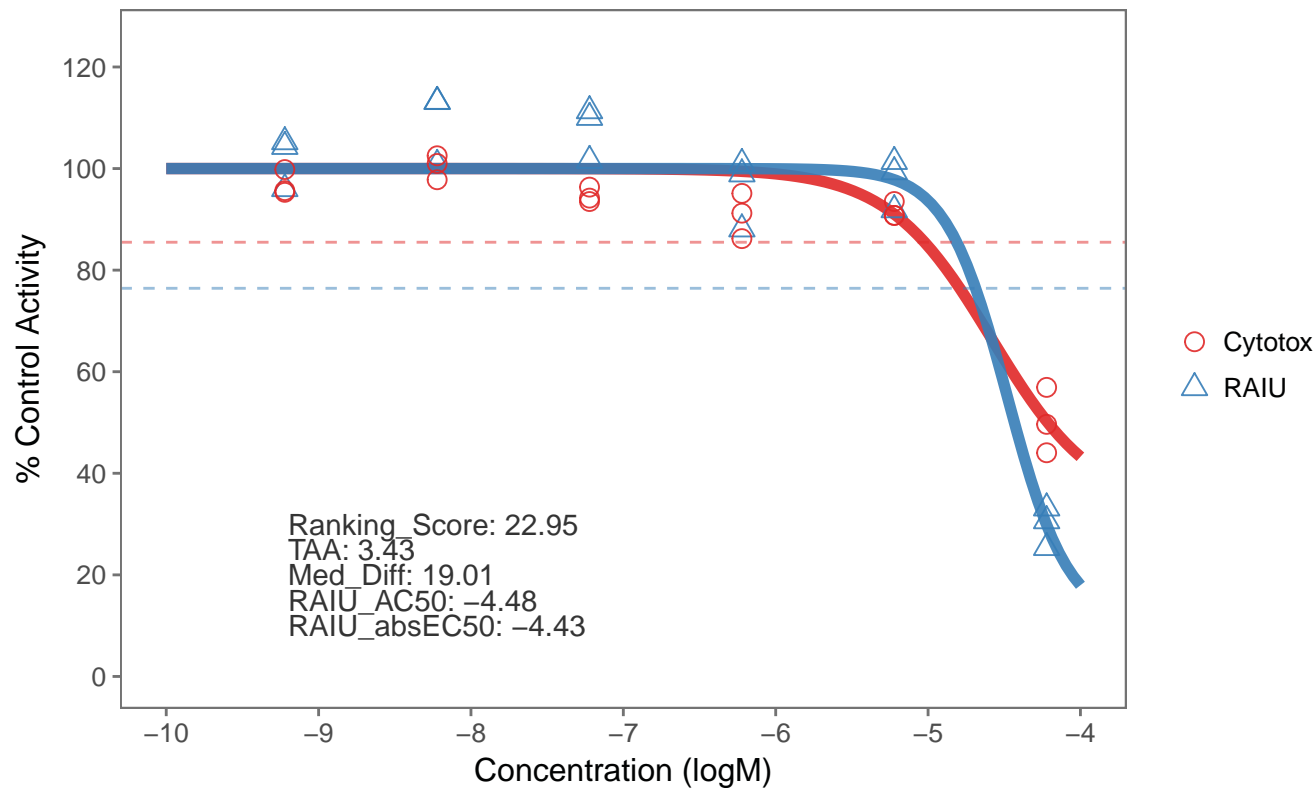

75. SPID: TP0001678B02  
NAME: 1,2-Benzisothiazolin-3-one  
CAS NO: 2634-33-5

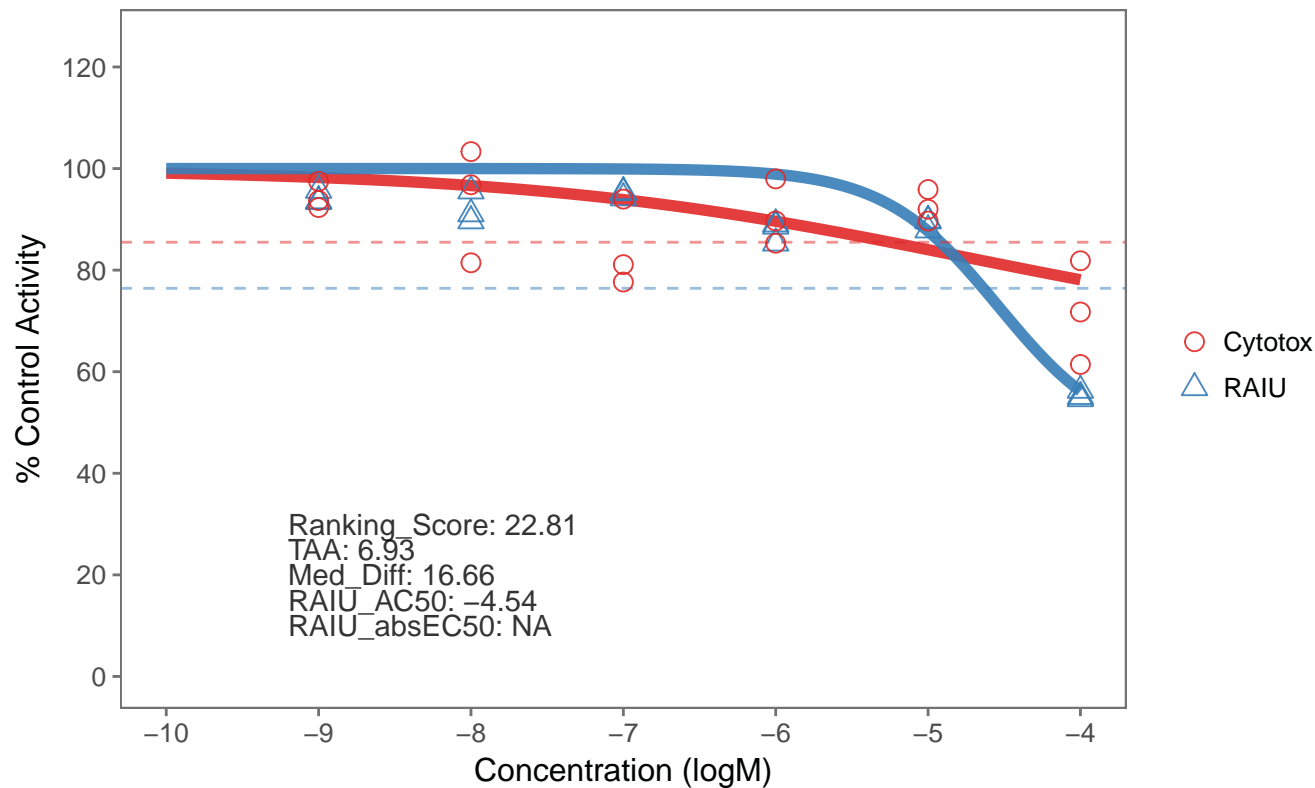

76. SPID: TP0001684E04  
NAME: 2-tert-Butyl-4-methoxyphenol  
CAS NO: 121-00-6

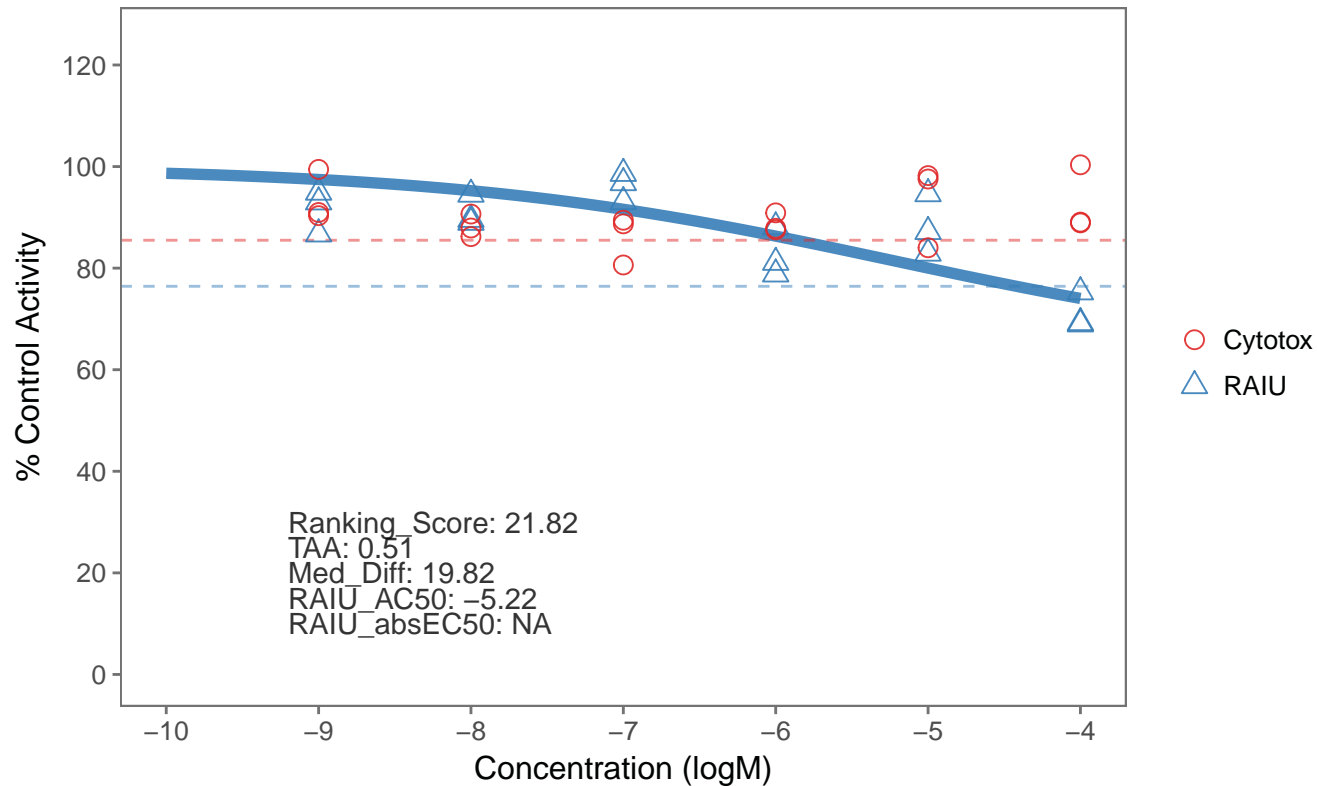

77. SPID: TP0001681B05

NAME: Ziram

CAS NO: 137-30-4

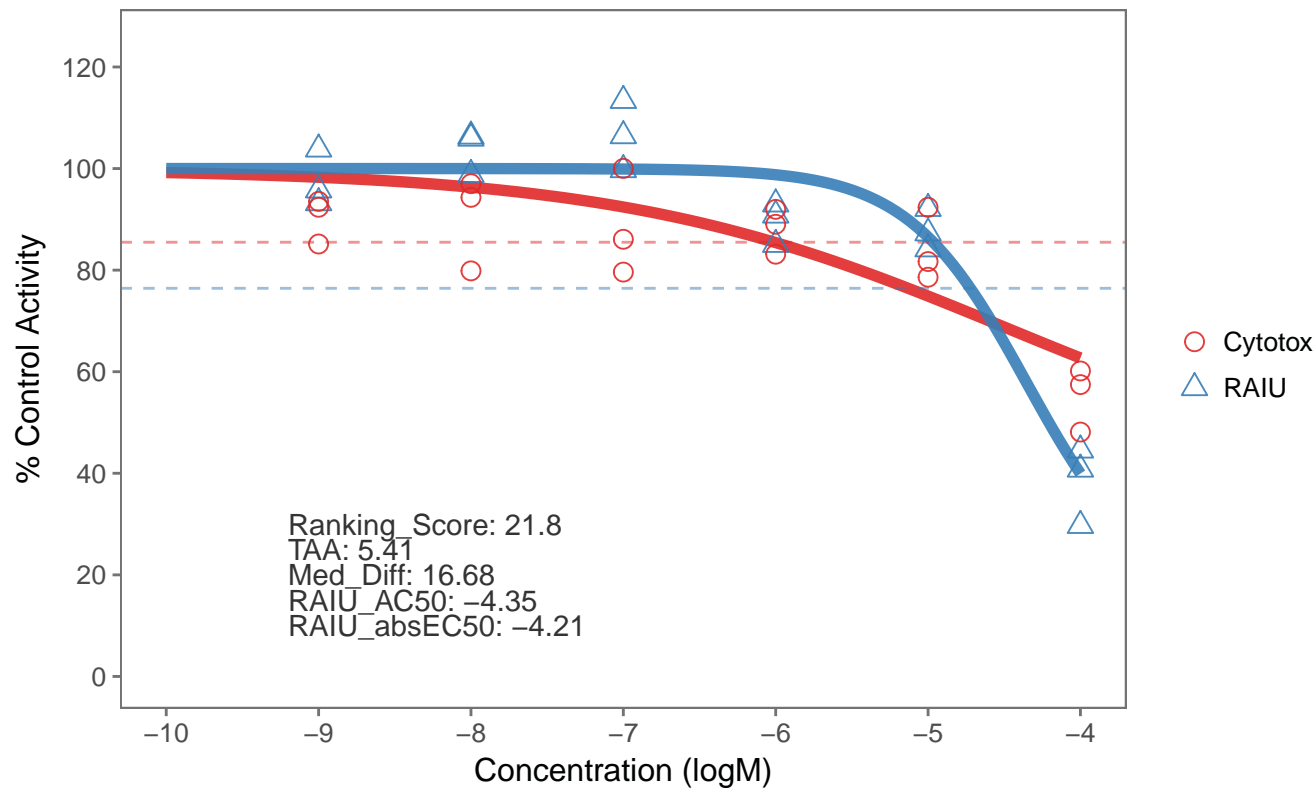

78. SPID: TP0001679B01  
NAME: Triphenyl phosphate  
CAS NO: 115-86-6

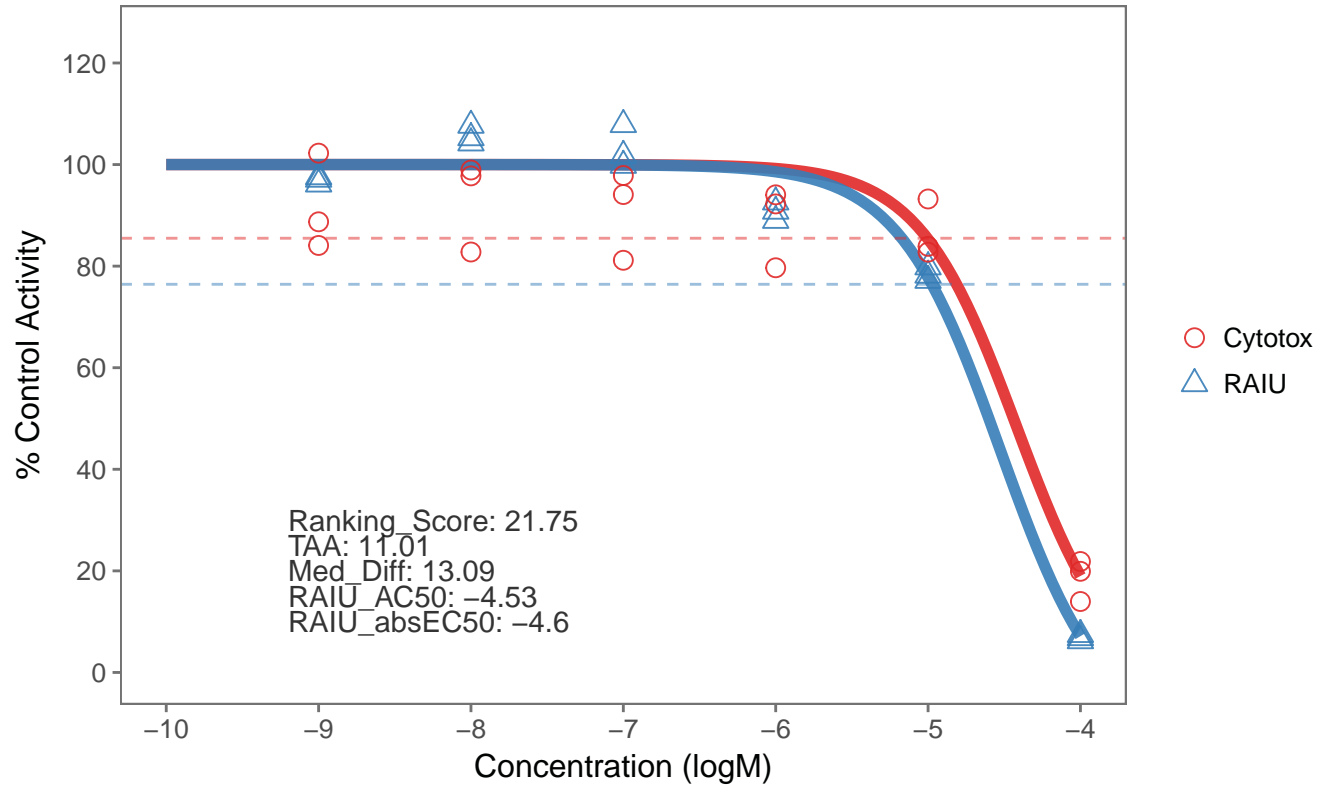

79. SPID: TP0001677D08

NAME: Terbufos

CAS NO: 13071-79-9

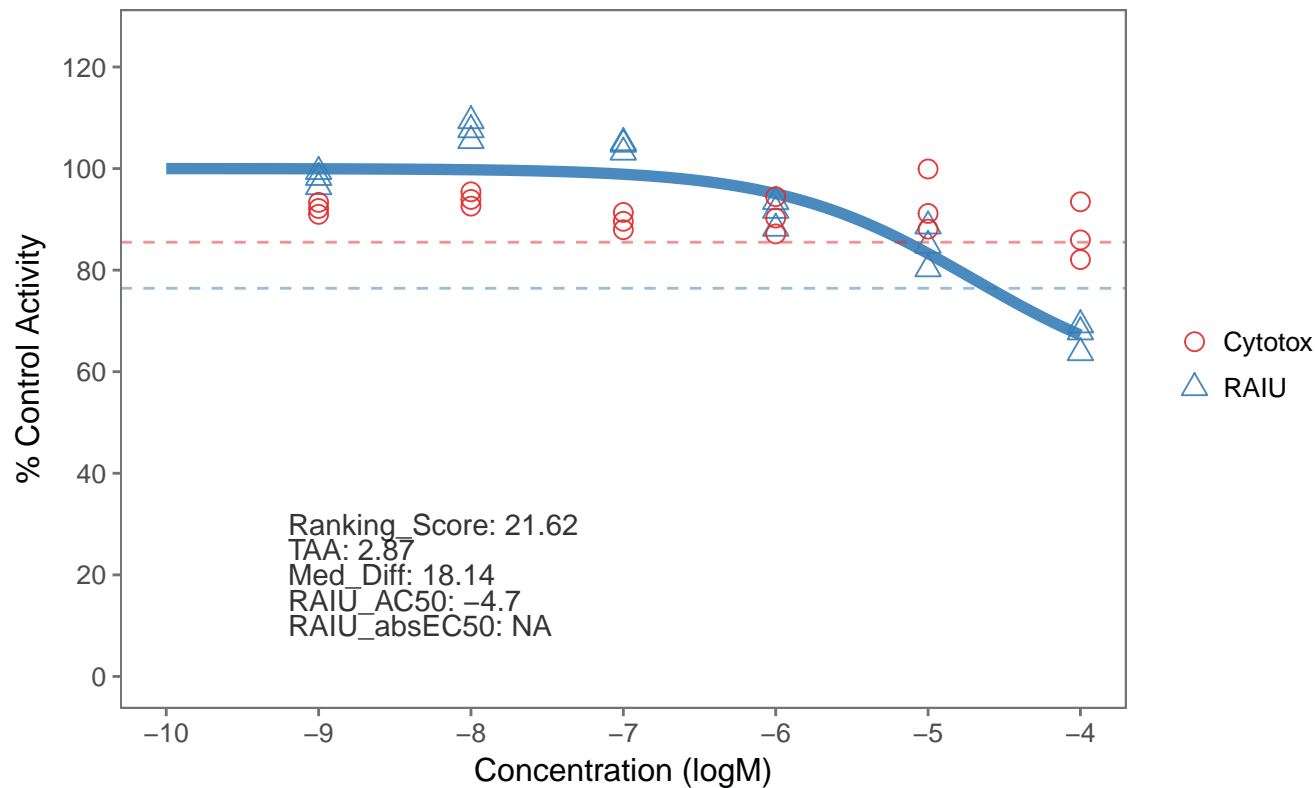

80. SPID: TP0001688G08

NAME: p,p'-DDT

CAS NO: 50-29-3

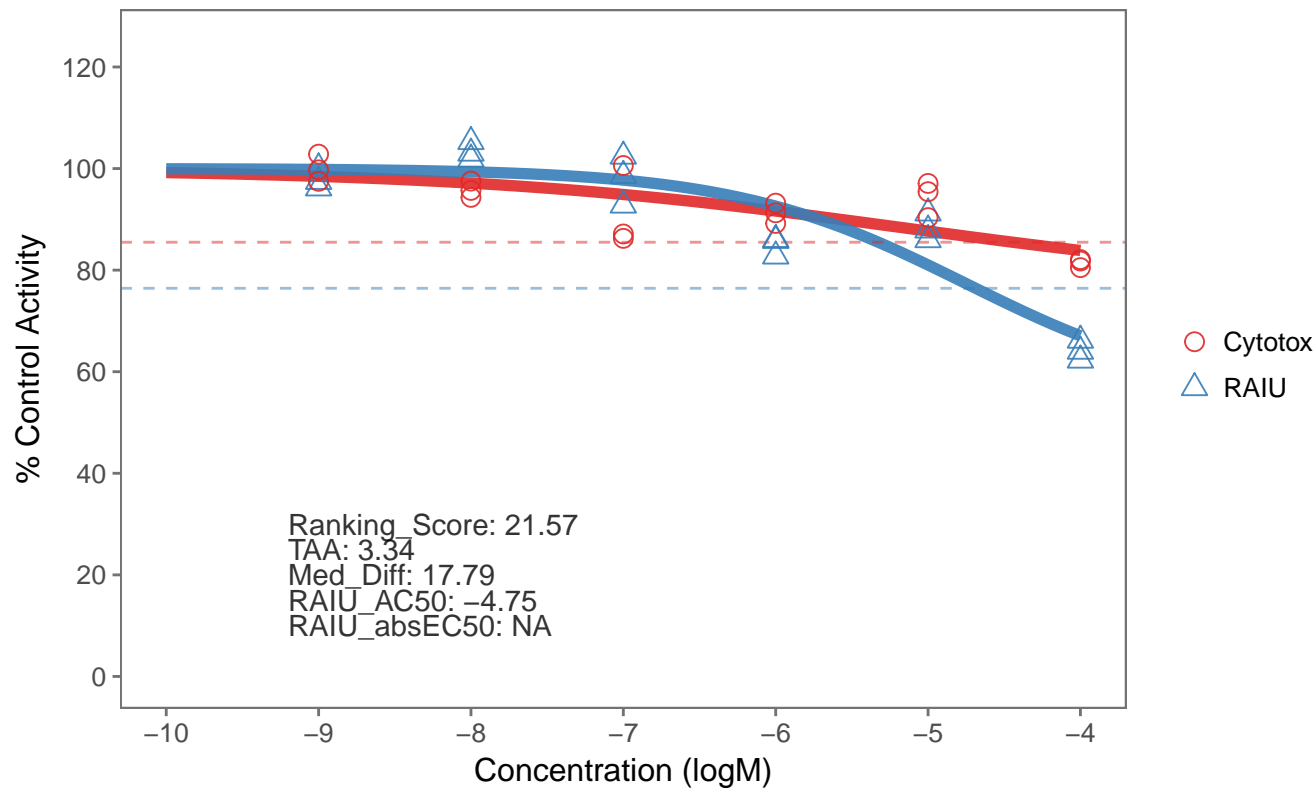



81. SPID: TP0001687E07  
NAME: Elzasonan  
CAS NO: 361343-19-3

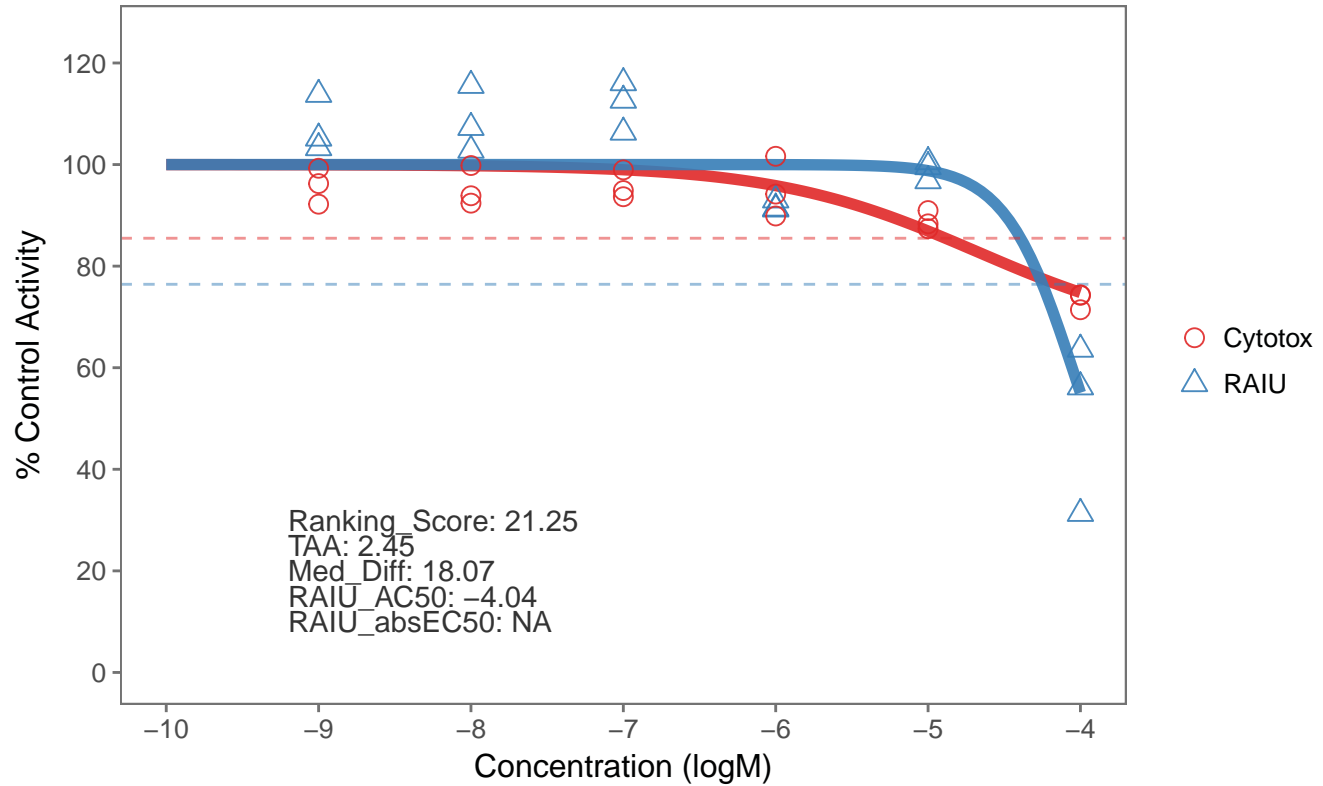

82. SPID: TP0001677C11

NAME: Clorophene

CAS NO: 120-32-1

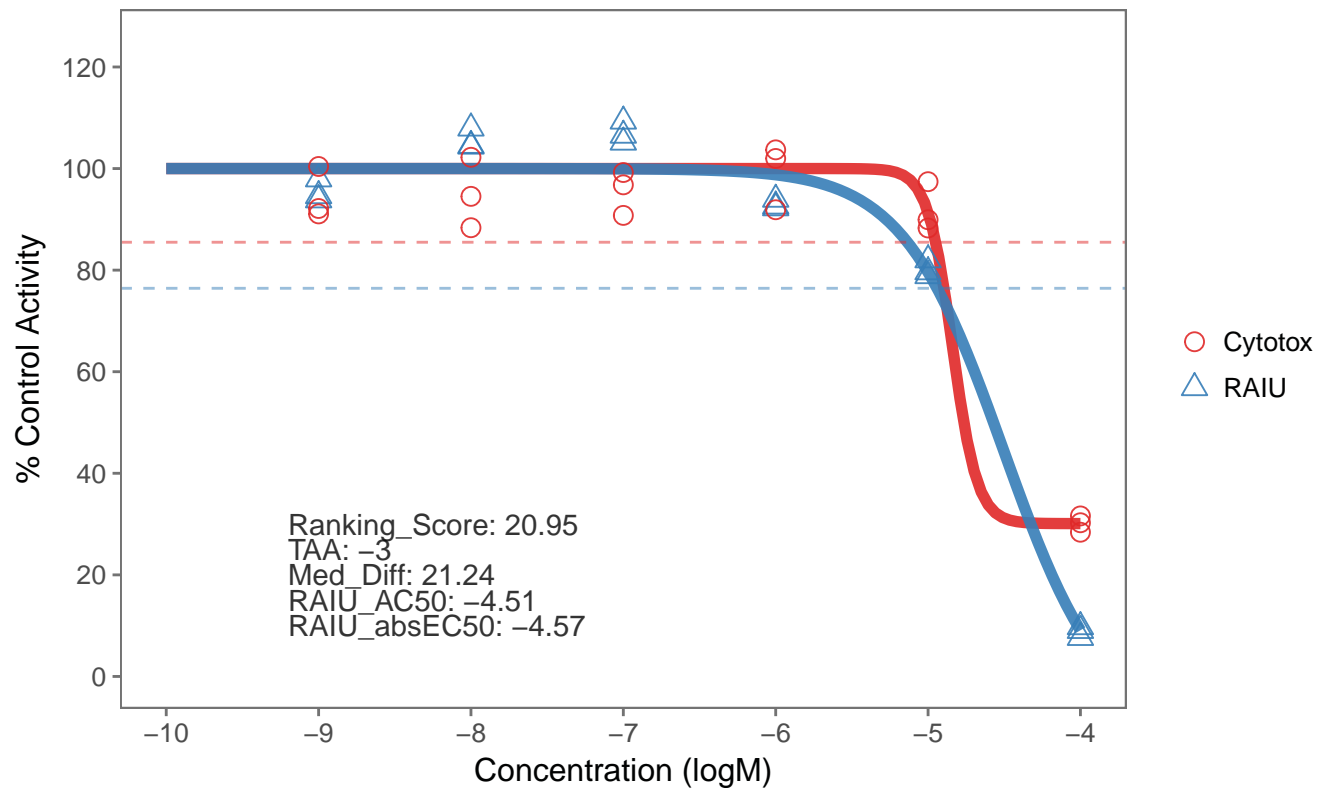

83. SPID: TP0001685G01  
NAME: 3,5,3'-Triiodothyronine  
CAS NO: 6893-02-3

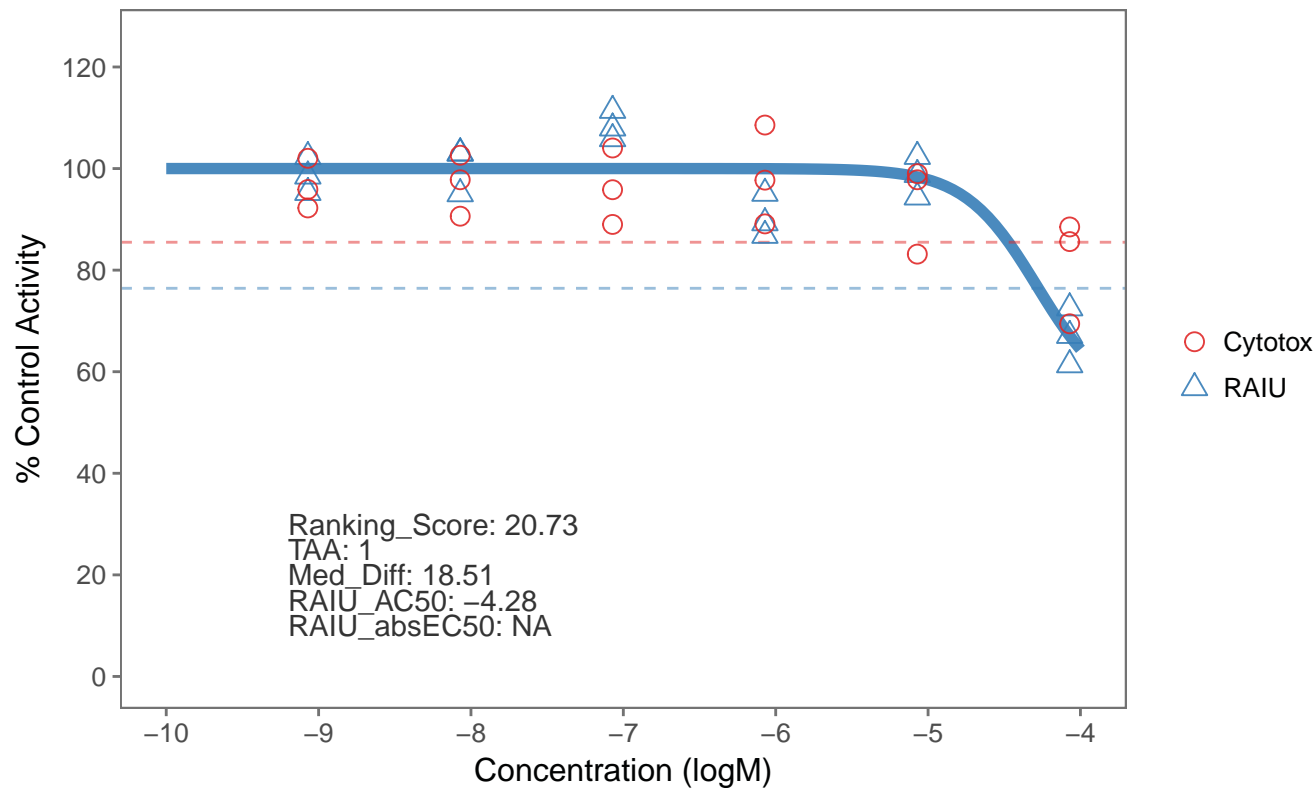

84. SPID: TP0001681C01  
NAME: SR58611  
CAS NO: 929601-09-2

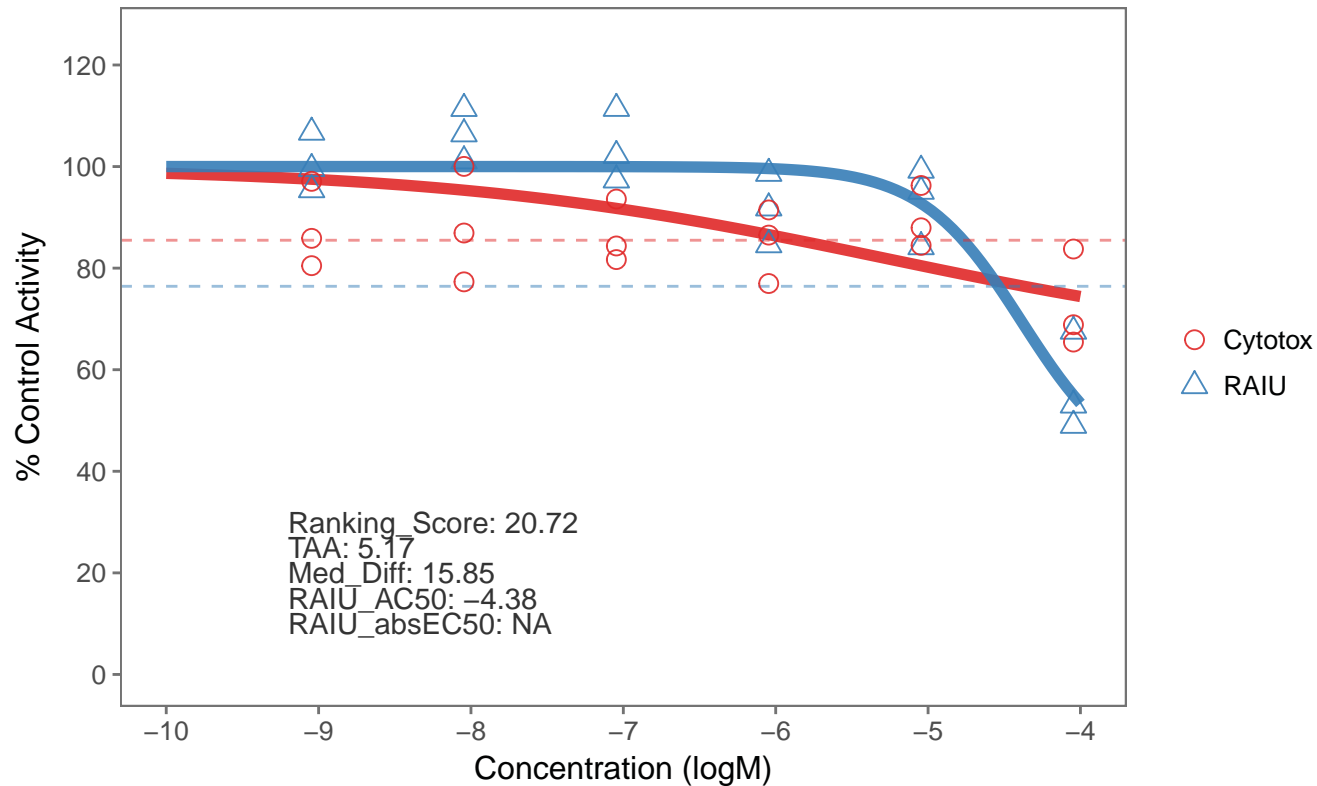

85. SPID: TP0001688E11  
NAME: SSR 241586 HCl  
CAS NO: NOCAS\_47353

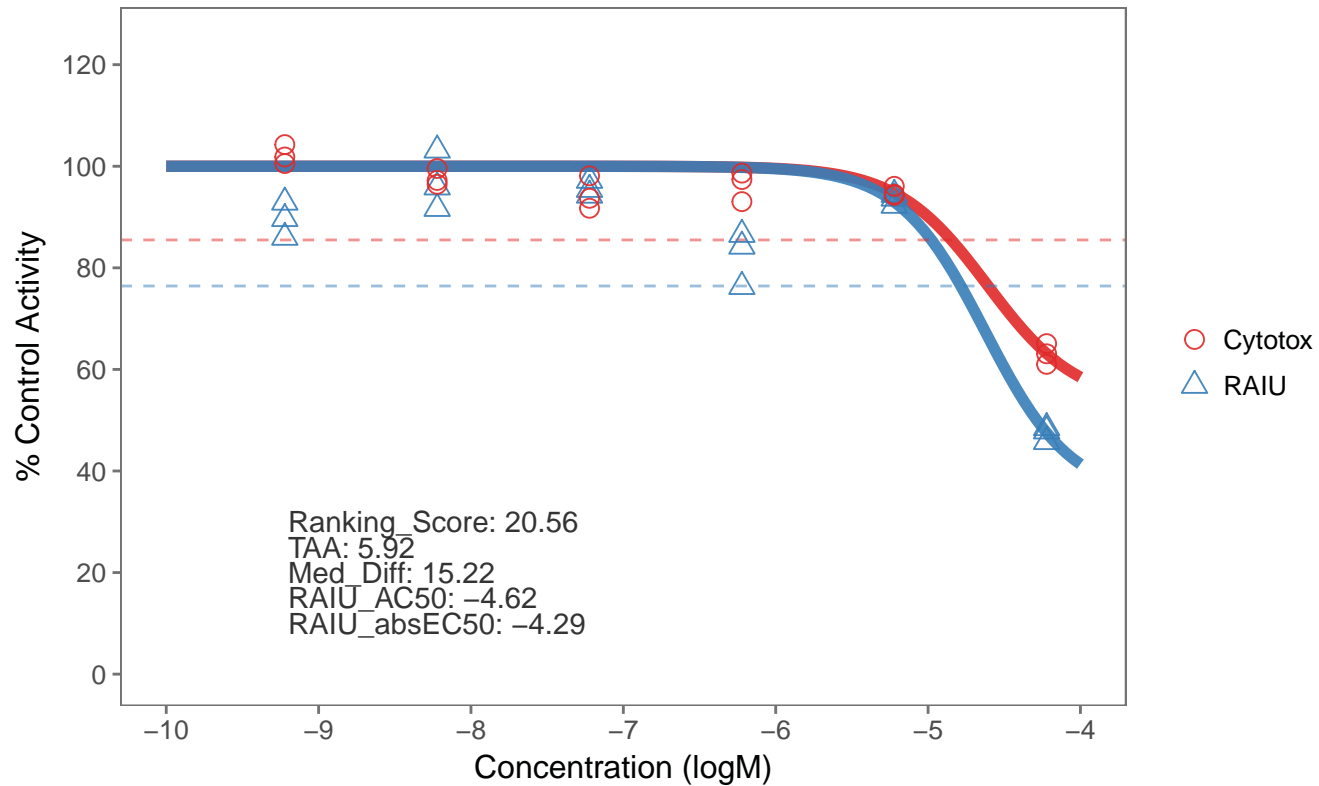

86. SPID: TP0001680E08  
NAME: PharmaGSID\_48506  
CAS NO: 588941-45-1

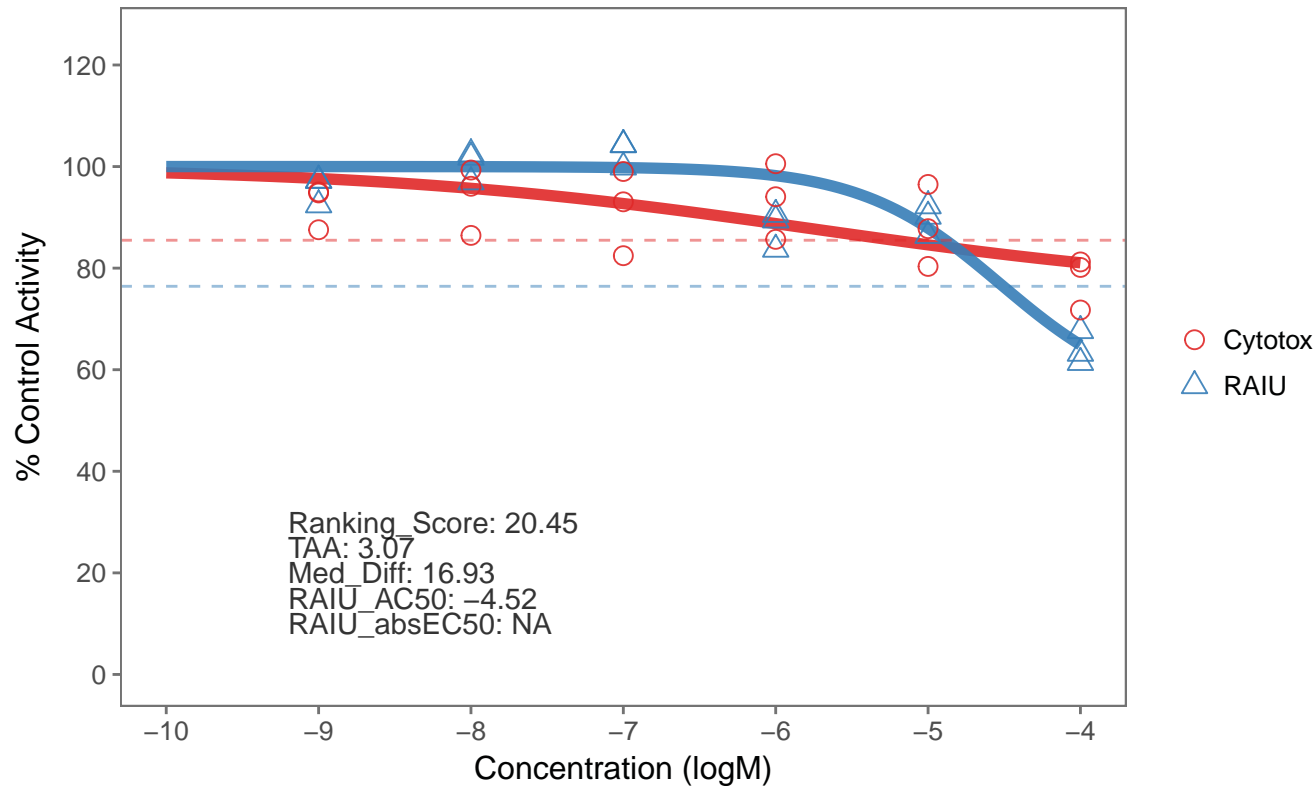

87. SPID: TP0001688B02

NAME: p,p'-DDD

CAS NO: 72-54-8

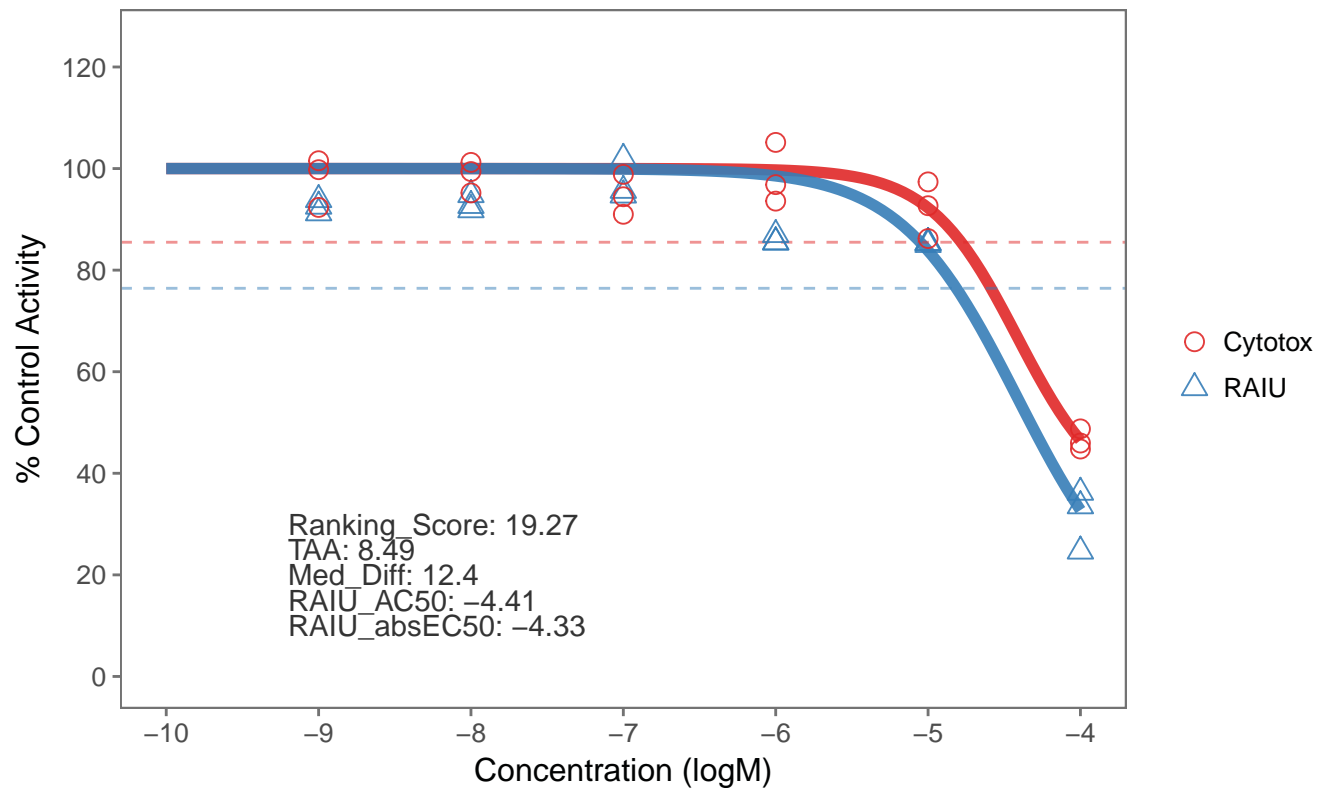

88. SPID: TP0001687C11  
NAME: 1,2-Phenylenediamine  
CAS NO: 95-54-5

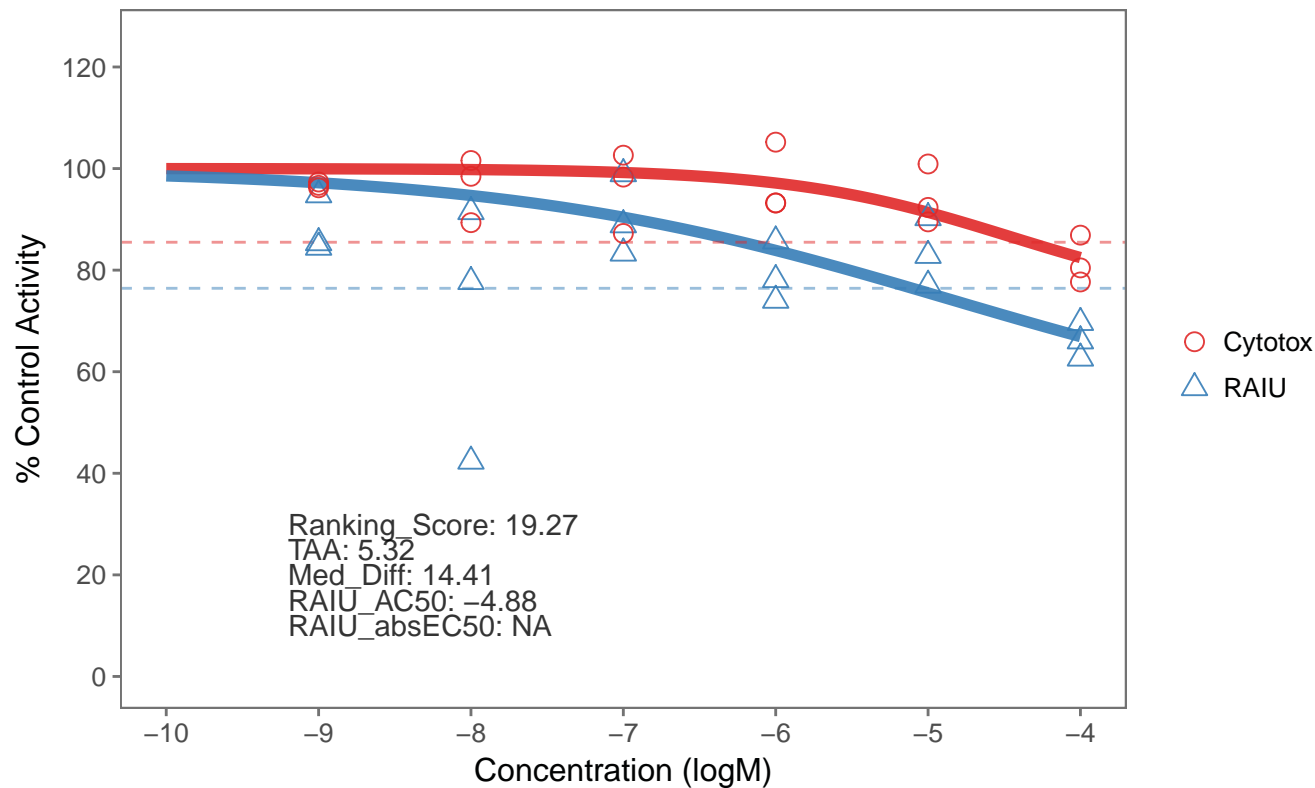



89. SPID: TP0001687F11  
NAME: Docusate sodium  
CAS NO: 577-11-7

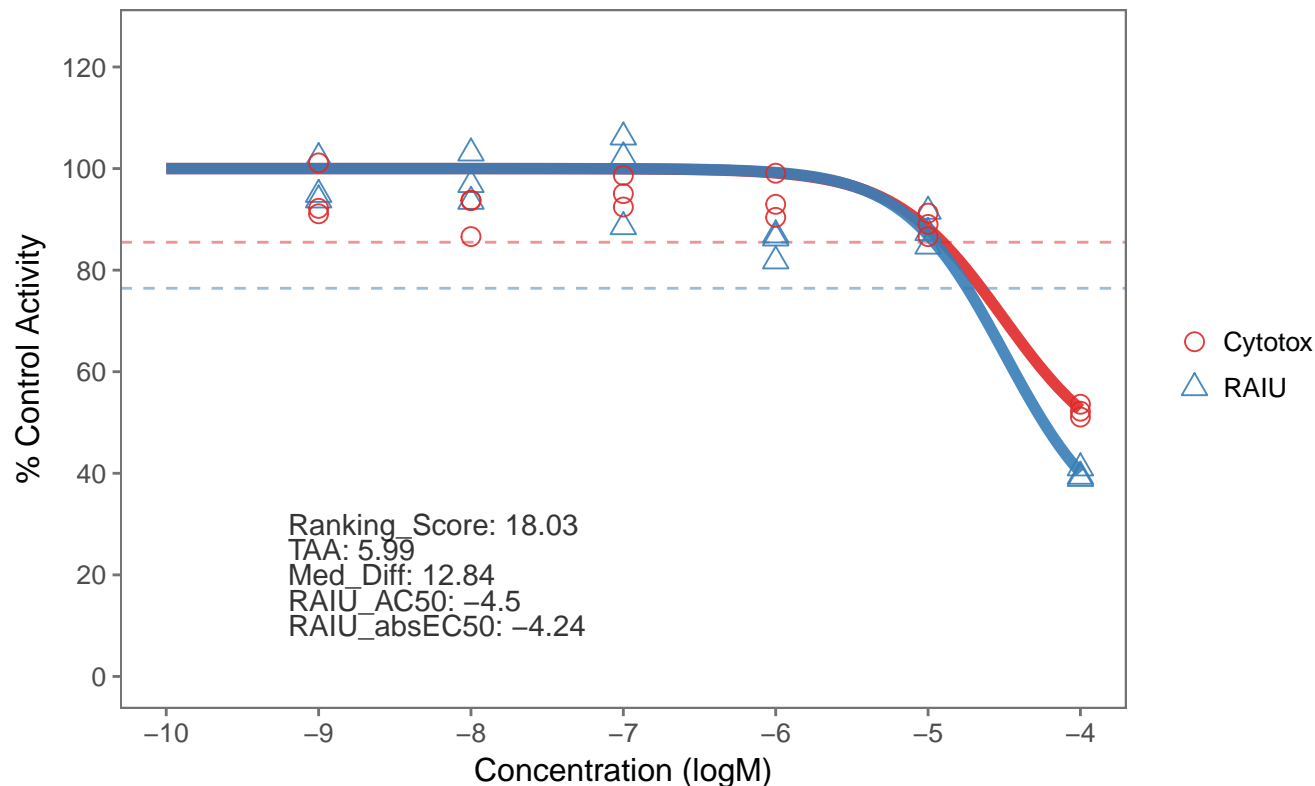

90. SPID: TP0001688C02  
NAME: Diphenyl isophthalate  
CAS NO: 744-45-6

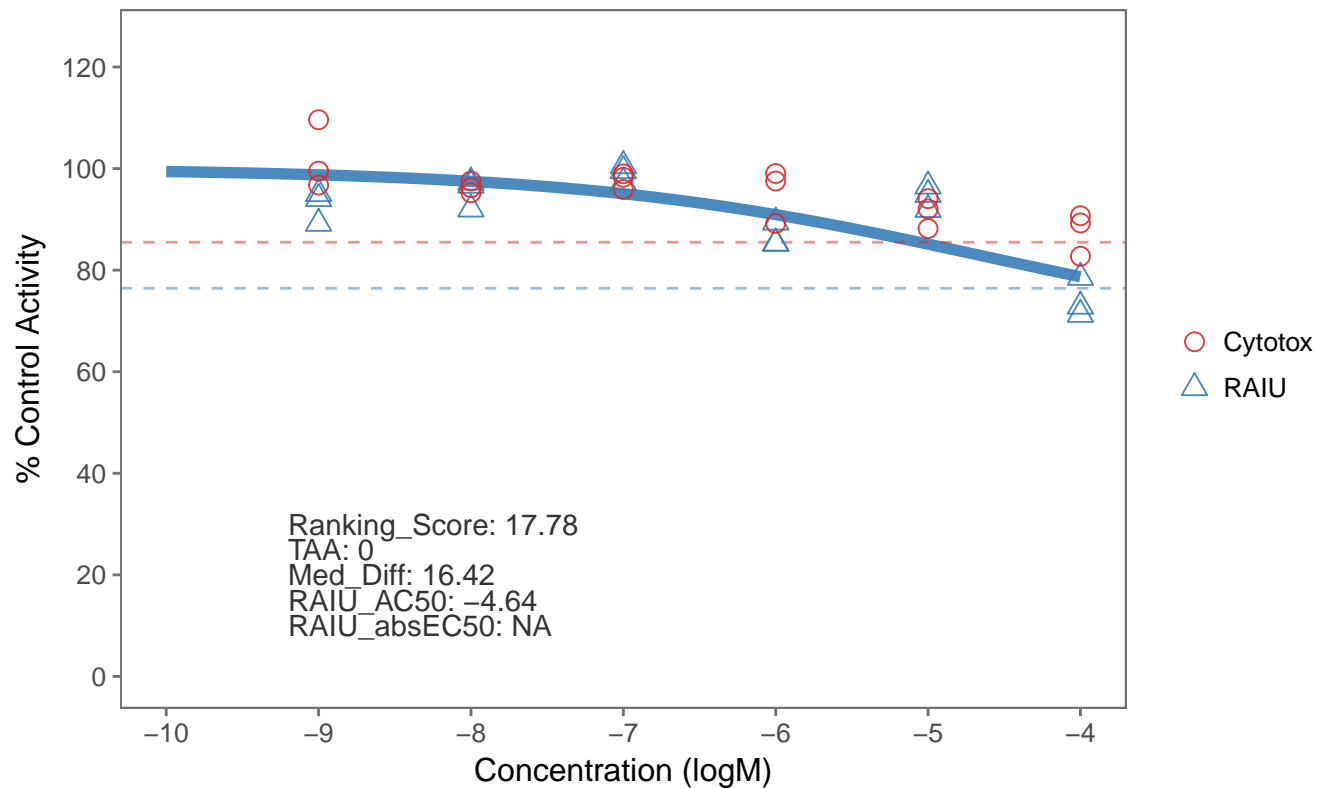

91. SPID: TP0001679B08  
NAME: 1H,1H,2H,2H-Perfluorooctyl iodide  
CAS NO: 2043-57-4

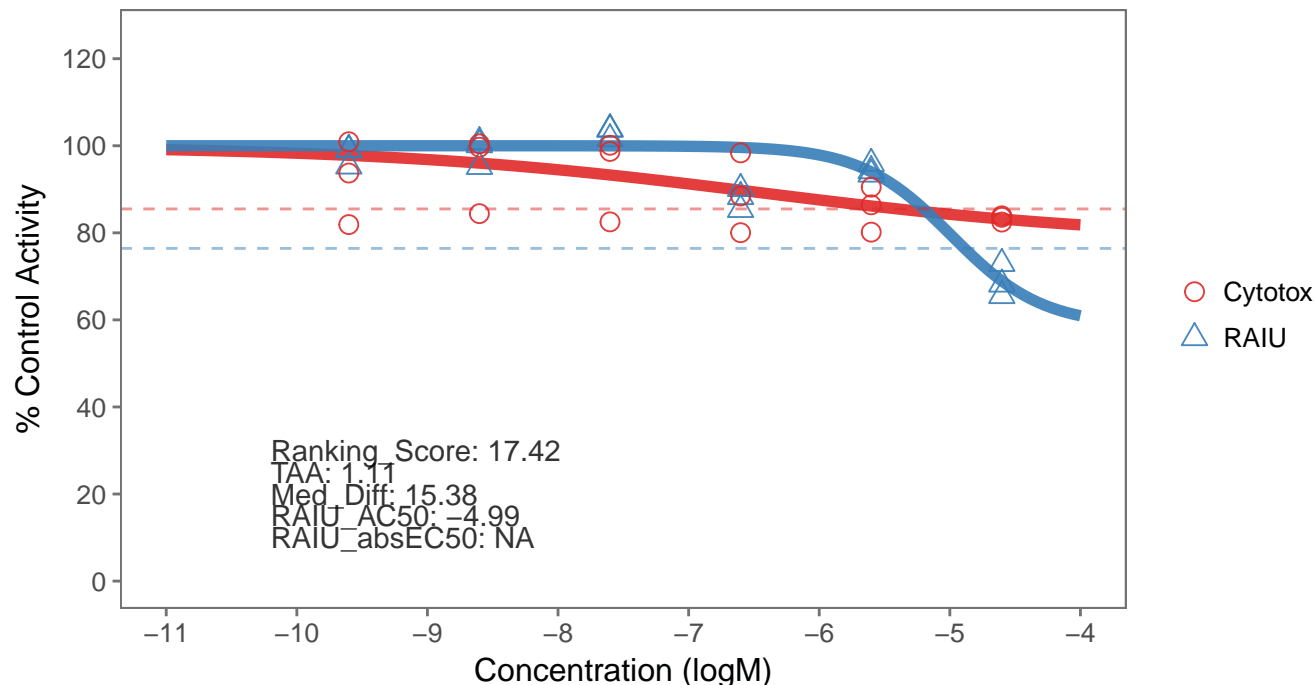

92. SPID: TP0001688B09  
NAME: Dodecyltrimethylammonium chloride  
CAS NO: 112-00-5

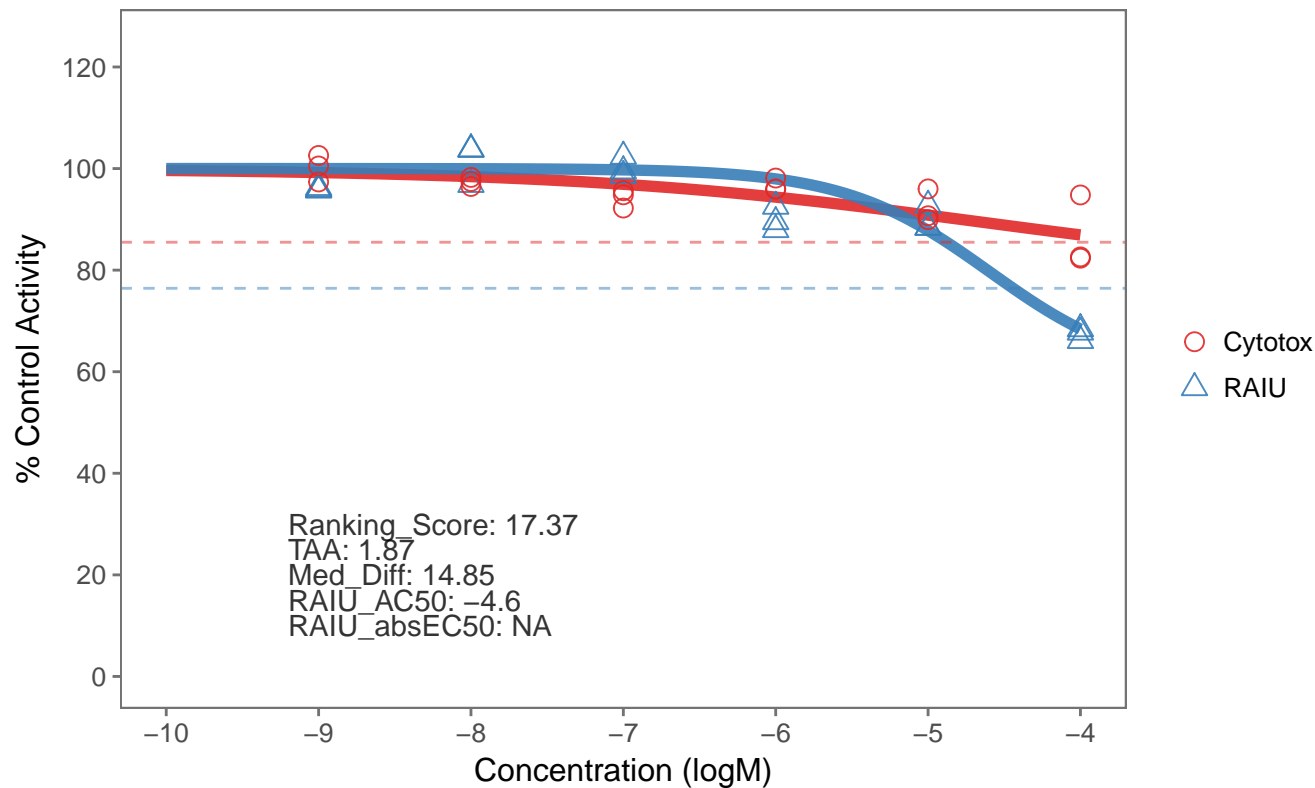

93. SPID: TP0001680D10  
NAME: Dodecylbenzene sulfonate triethanolamine(1:1)  
CAS NO: 27323-41-7

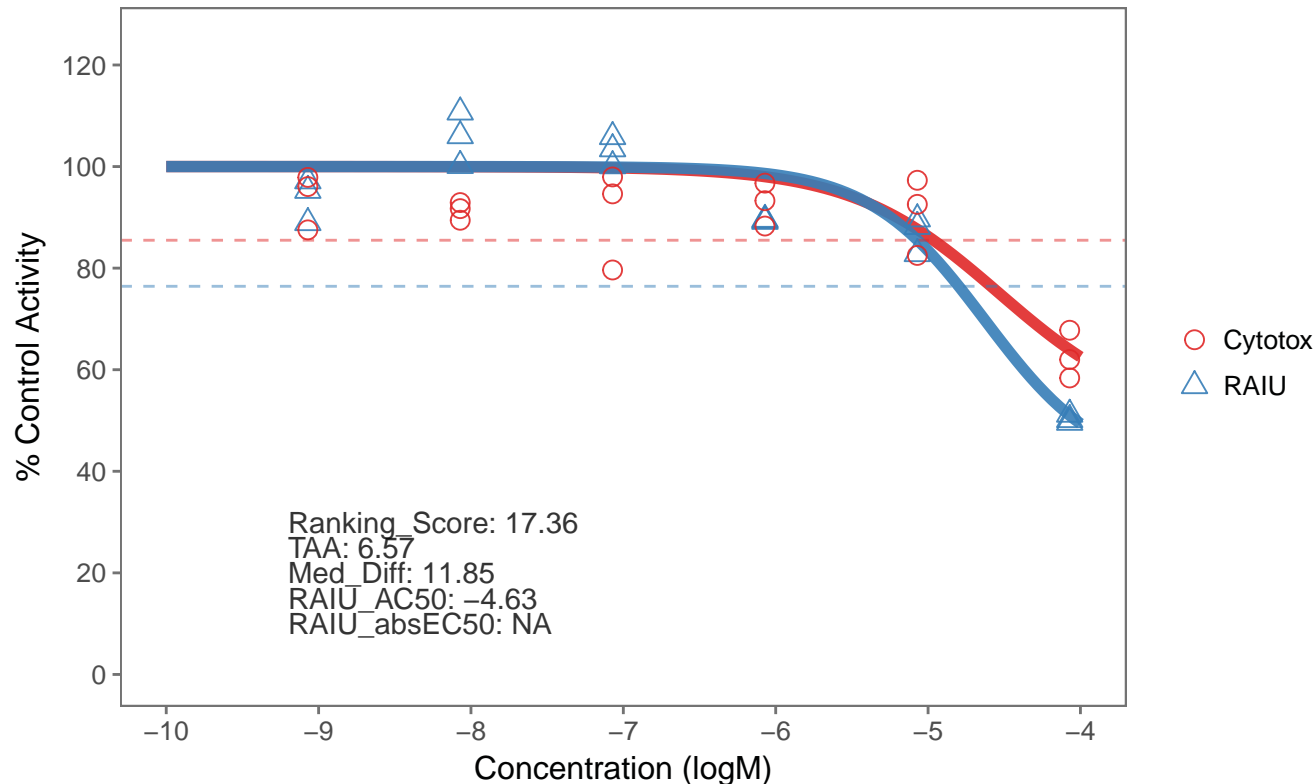

94. SPID: TP0001685G02

NAME: Aldrin

CAS NO: 309-00-2

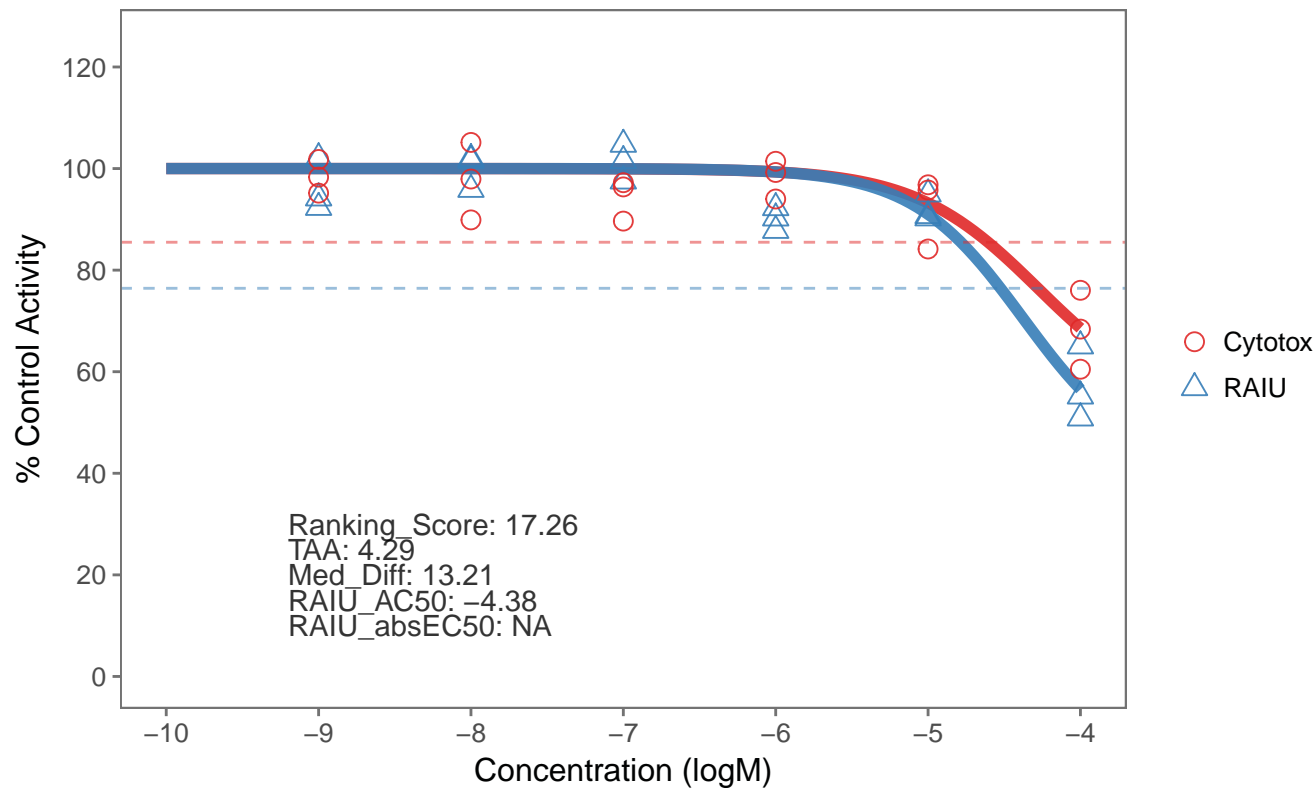

95. SPID: TP0001684F10

NAME: Allethrin

CAS NO: 584-79-2

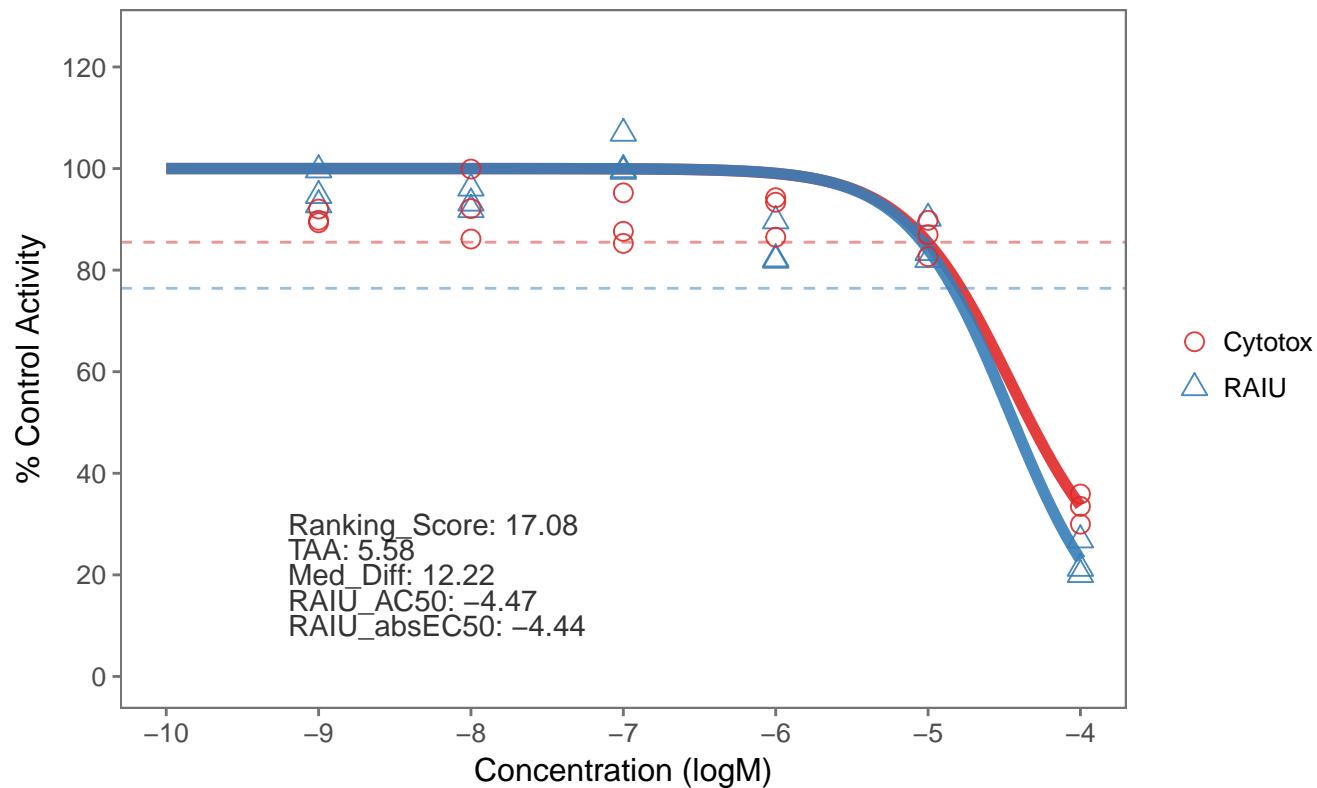

96. SPID: TP0001684E01

NAME: p,p'-DDE

CAS NO: 72-55-9

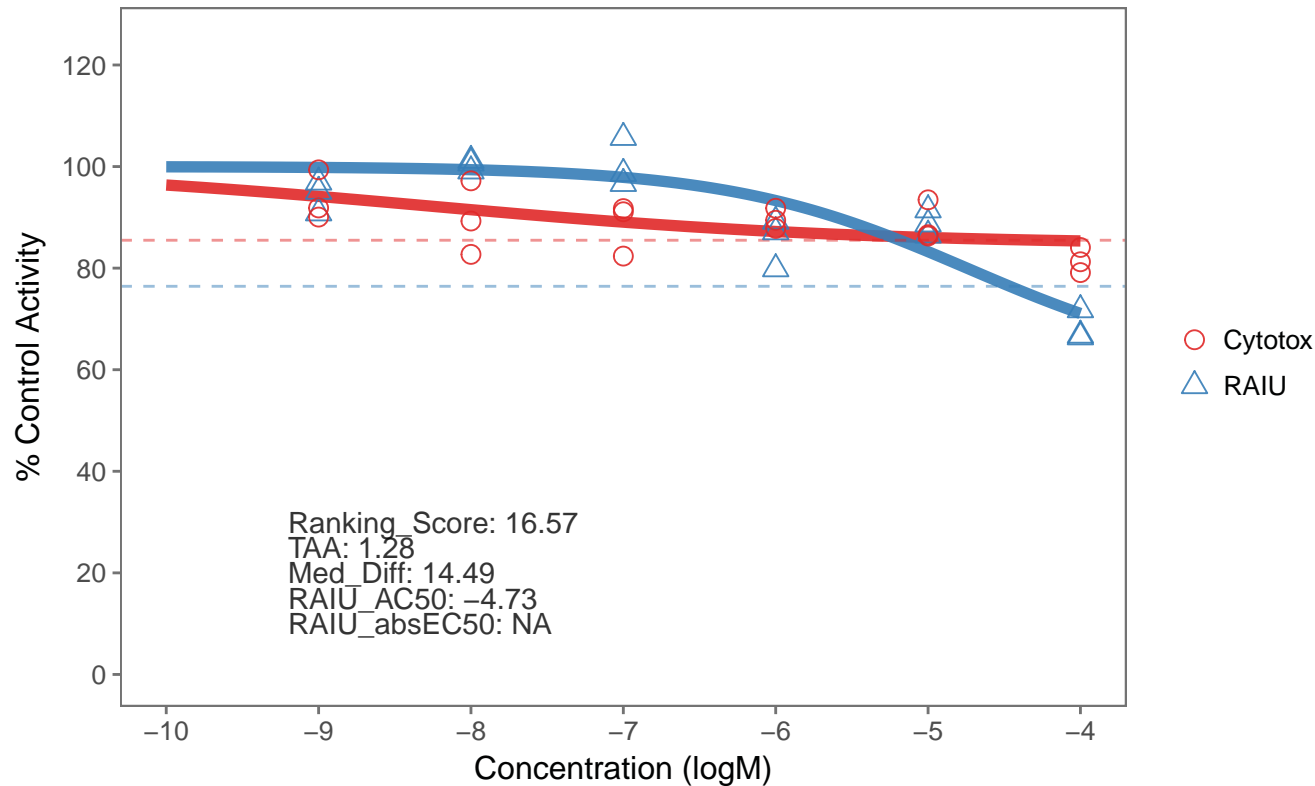



97. SPID: TP0001678F11

NAME: CP-283097

CAS NO: 171866-31-2

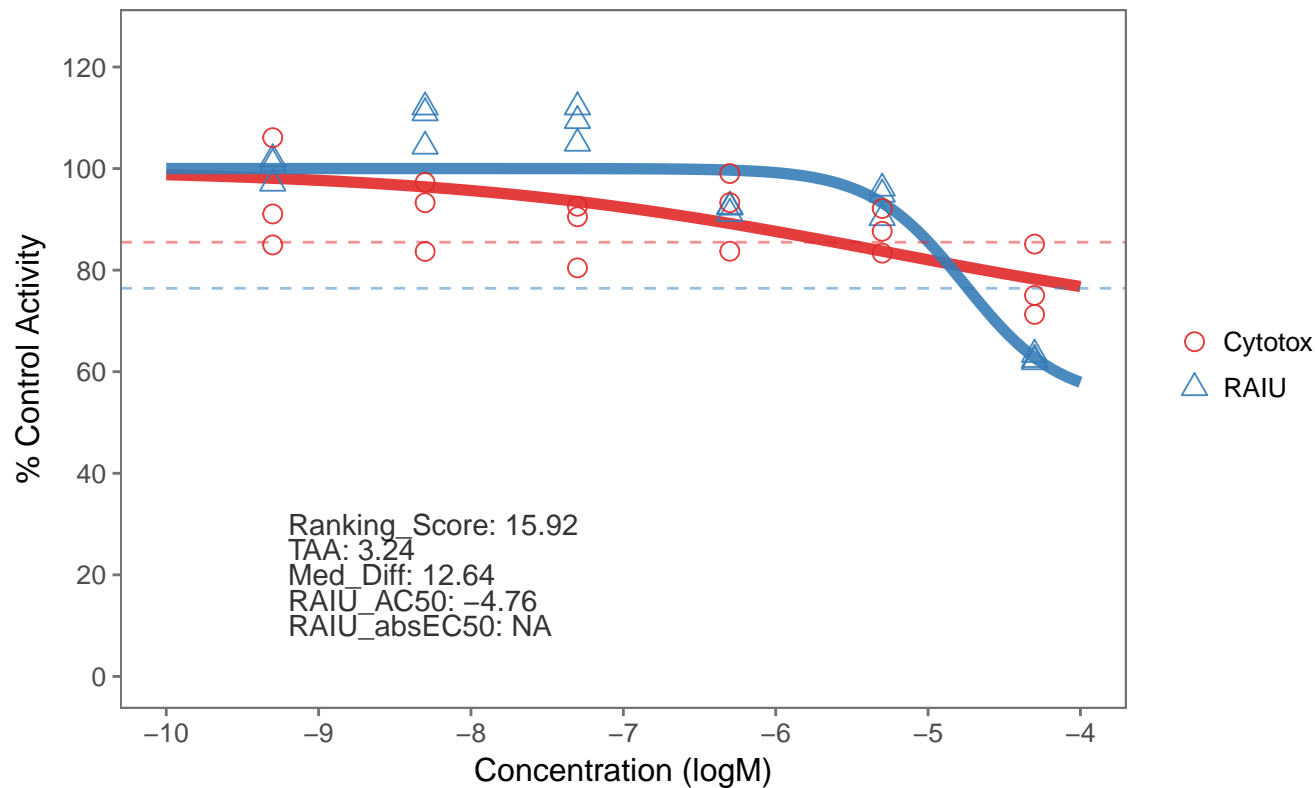

98. SPID: TP0001687B04  
NAME: 2-tert-Butyl-5-methylphenol  
CAS NO: 88-60-8

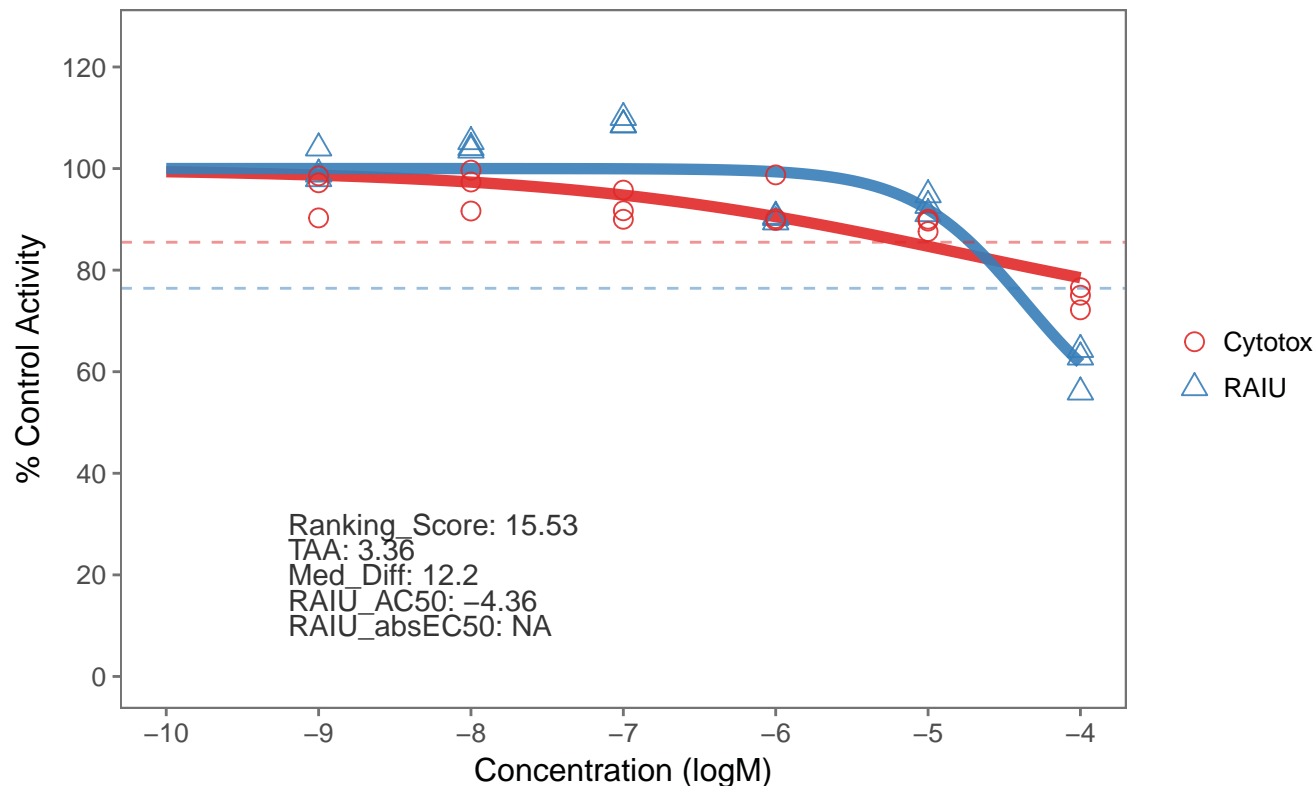

99. SPID: TP0001684F07  
NAME: Sodium hexyldecyl sulfate  
CAS NO: 1120-01-0

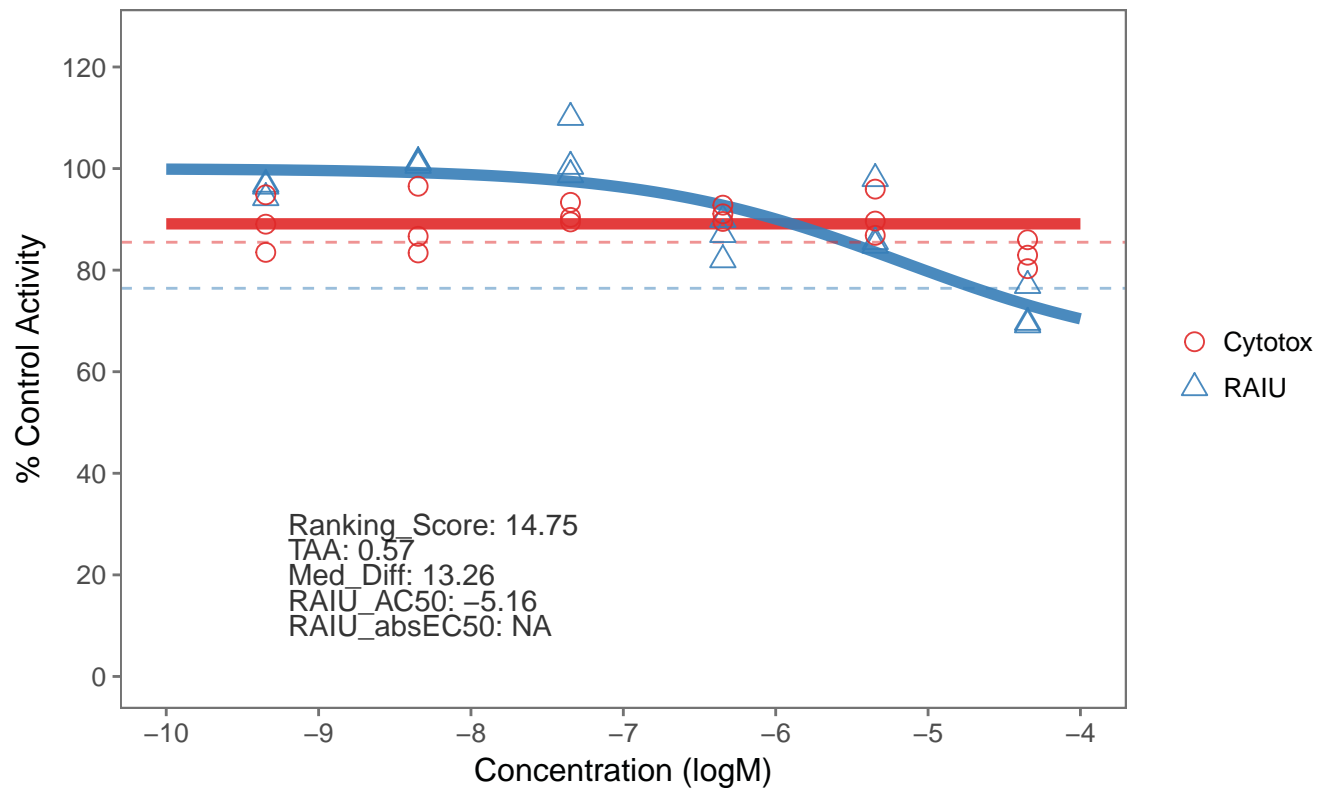

100. SPID: TP0001685C07  
NAME: 2-Amino-5-azotoluene  
CAS NO: 97-56-3

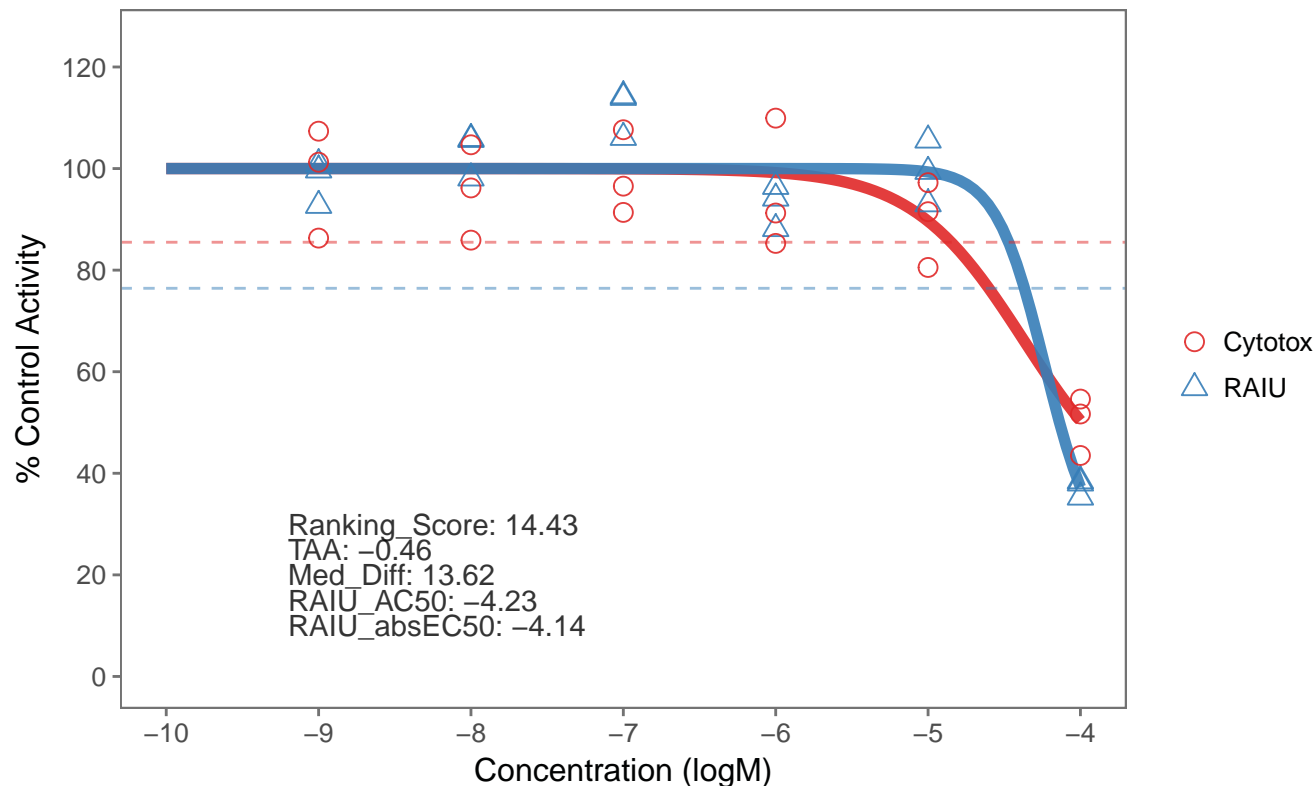

101. SPID: TP0001679F09

NAME: Bisphenol A

CAS NO: 80-05-7

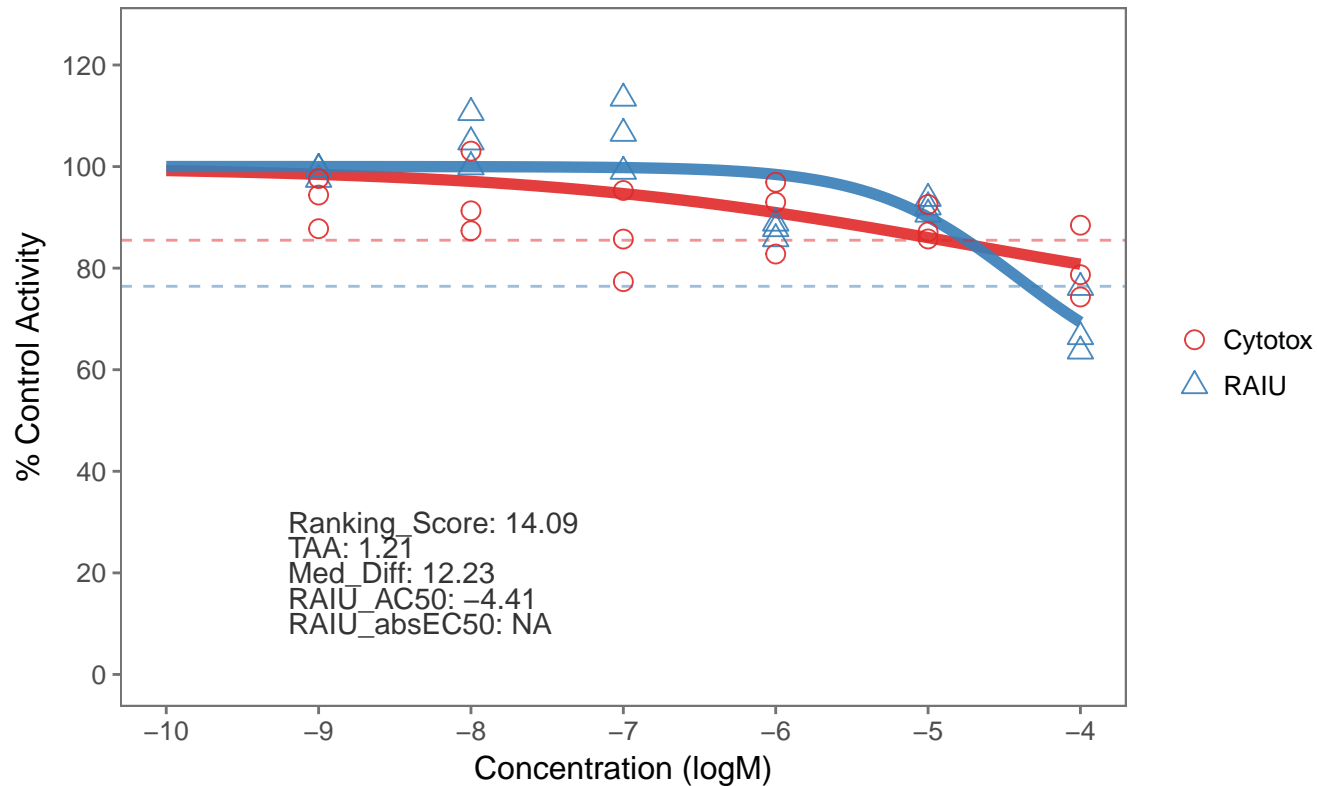

102. SPID: TP0001681E07  
NAME: 2,4-Bis(2-methylbutan-2-yl)phenol  
CAS NO: 120-95-6

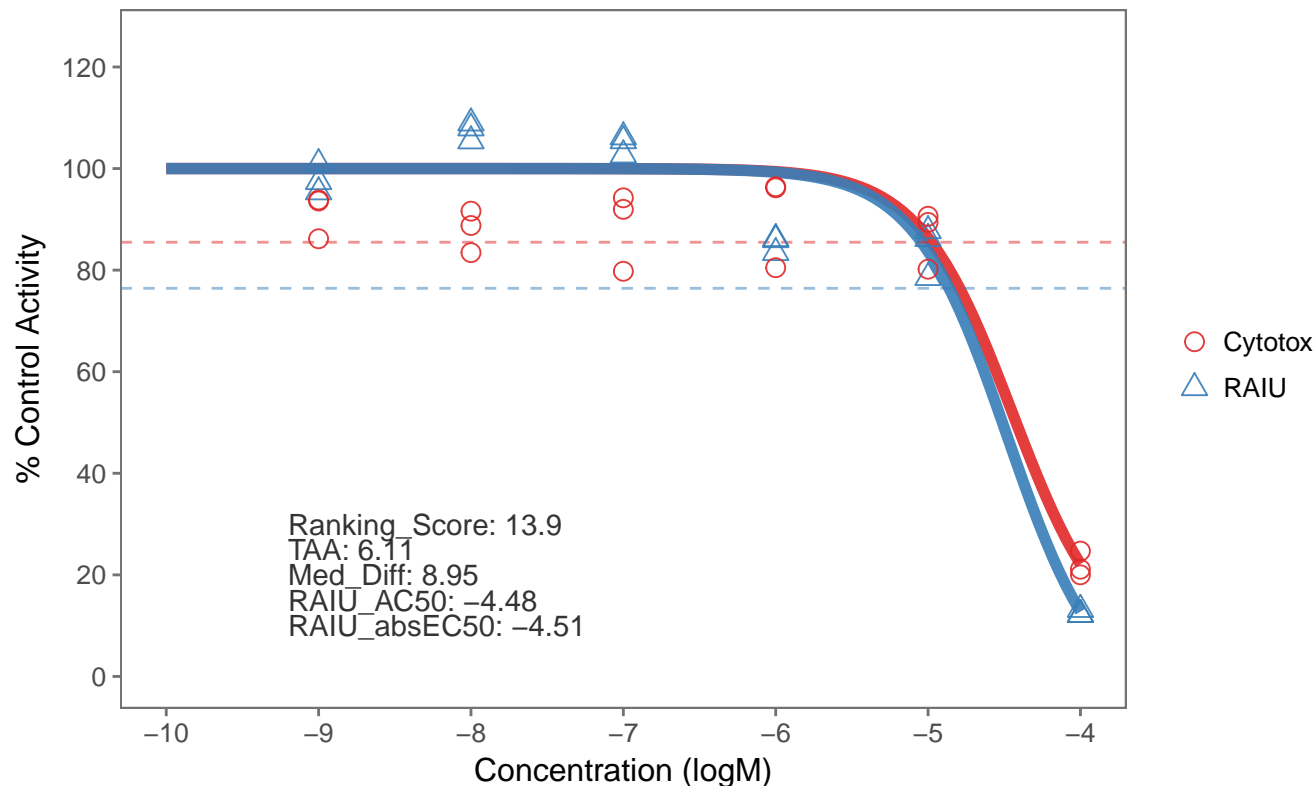

103. SPID: TP0001679D04

NAME: Phenanthrene

CAS NO: 85-01-8

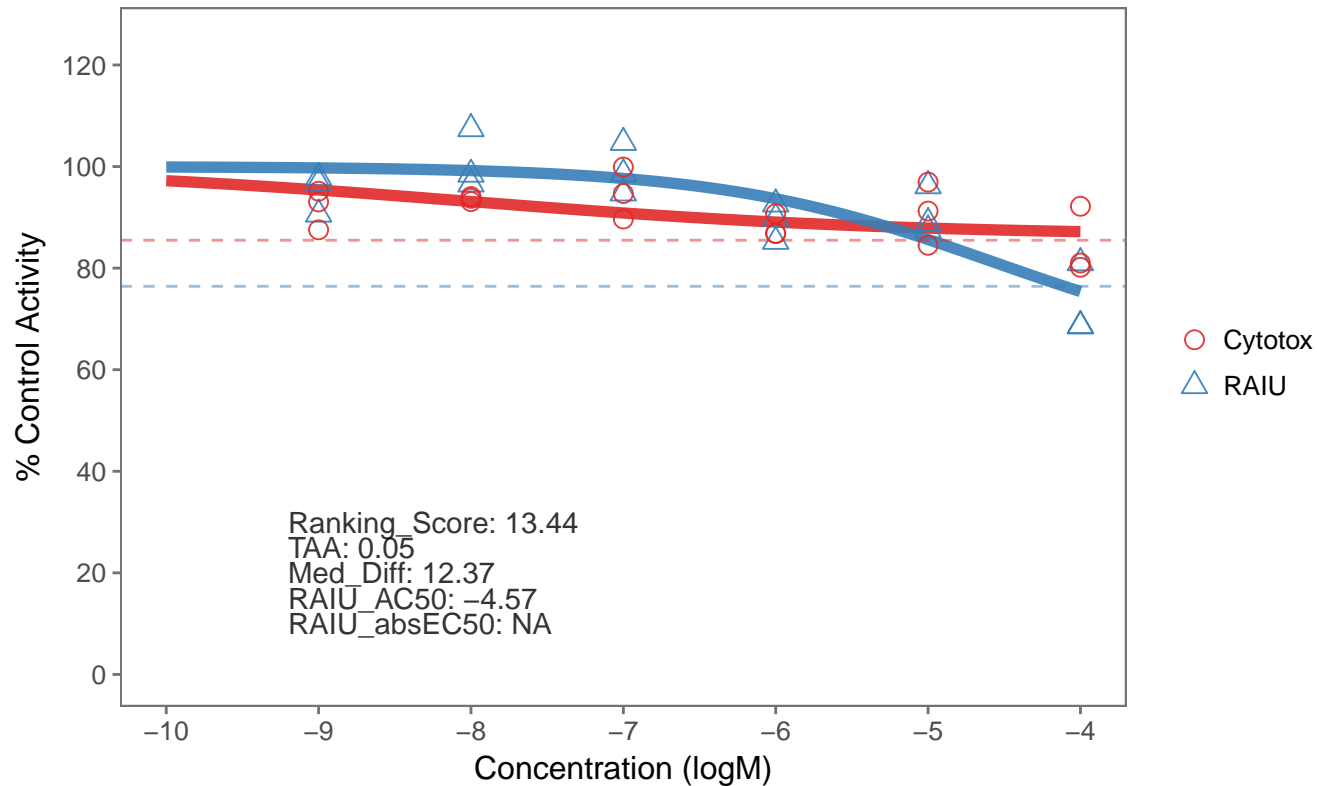

104. SPID: TP0001678B09  
NAME: HMR1171 trifluoroacetate (1:1)  
CAS NO: NOCAS\_48522

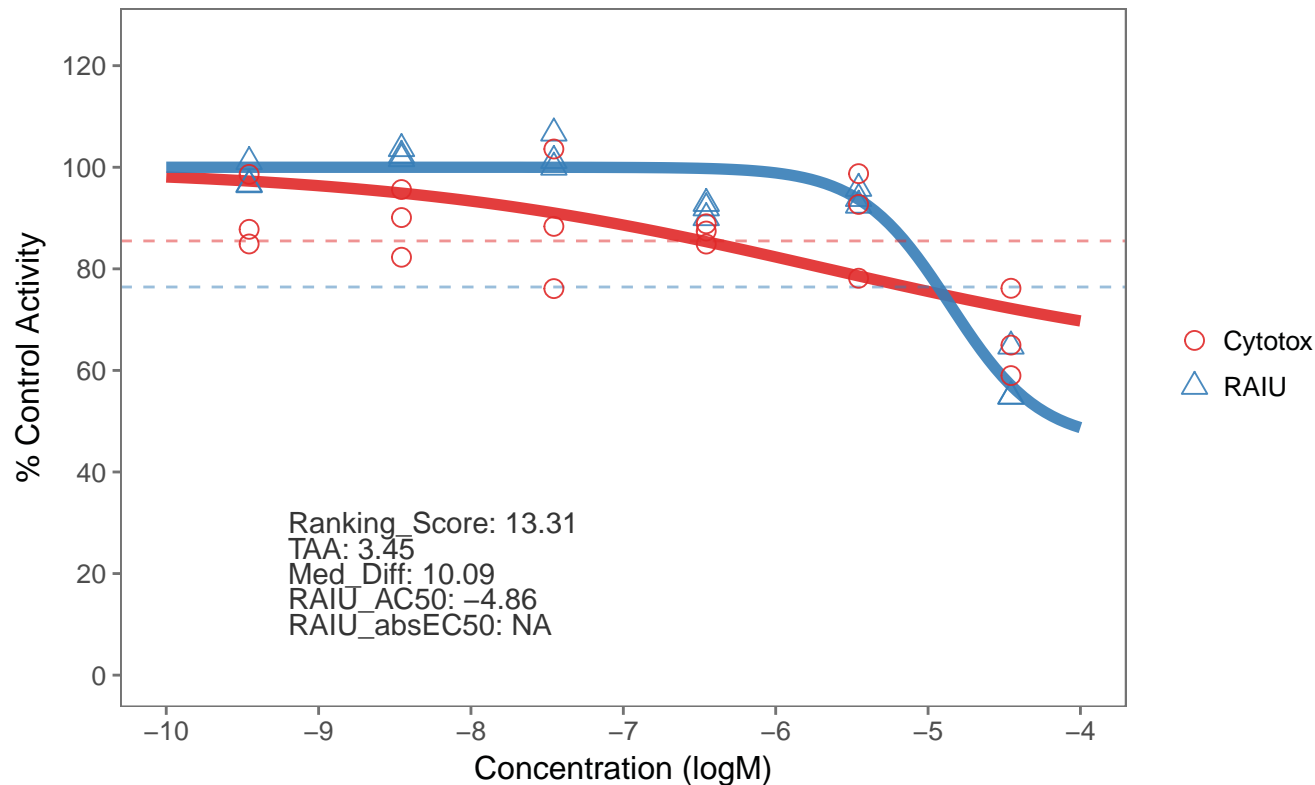



105. SPID: TP0001677D05  
NAME: Sodium myristyl sulfate  
CAS NO: 1191-50-0

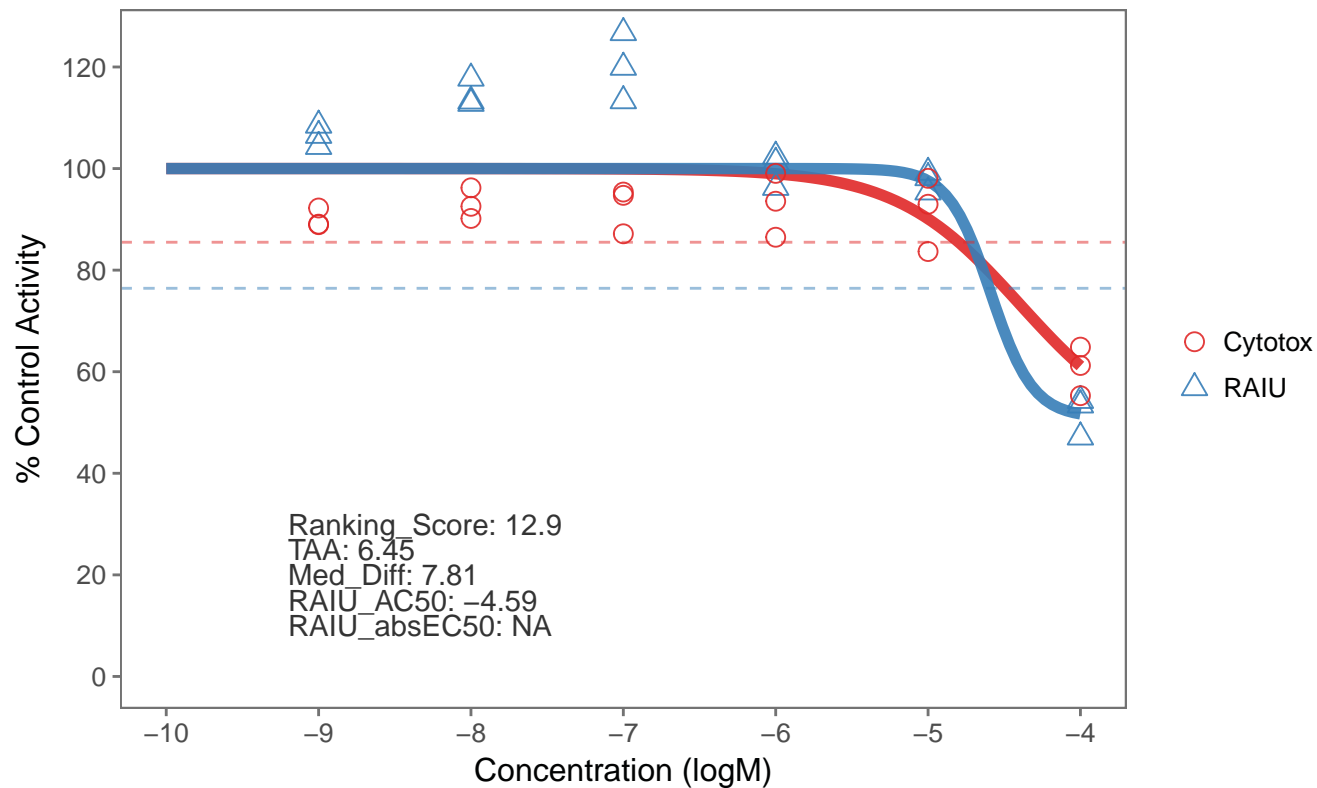

106. SPID: TP0001689C08

NAME: 2-tert-Butylphenol

CAS NO: 88-18-6

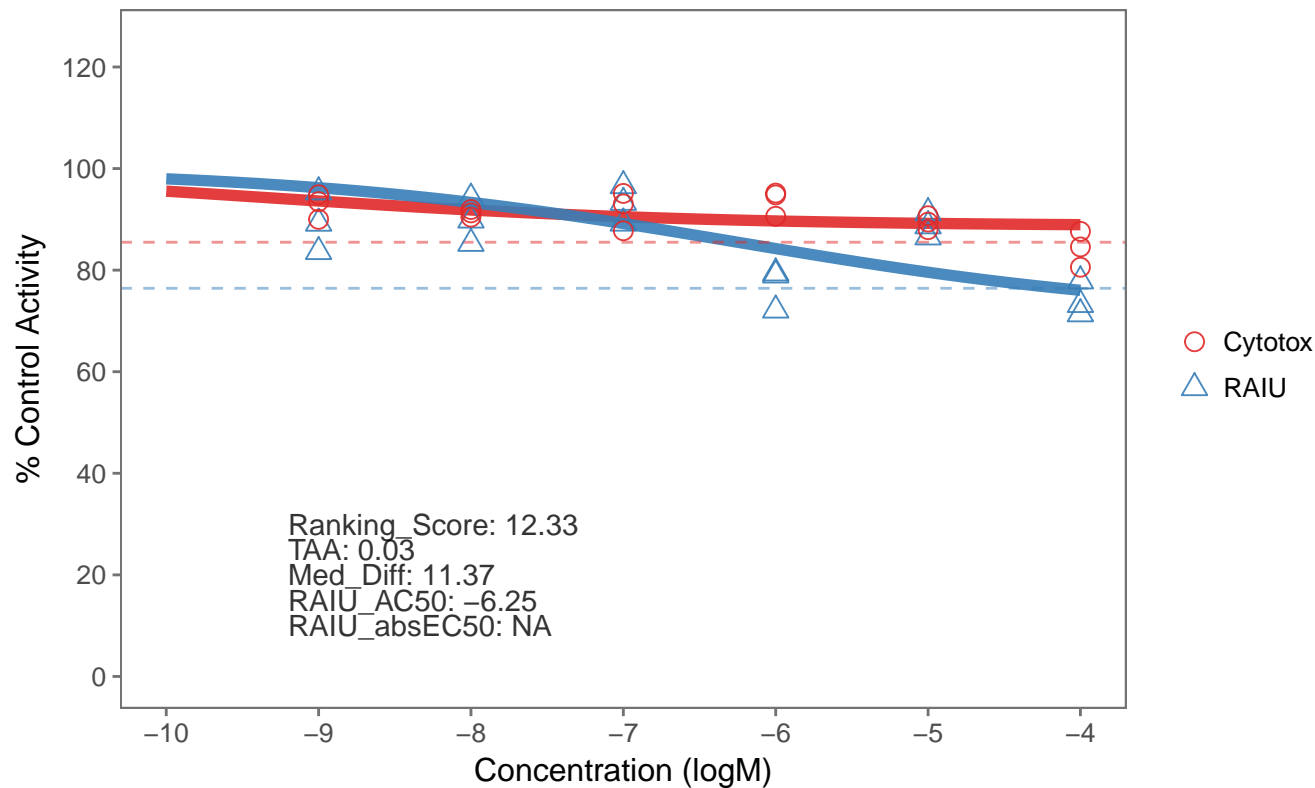

107. SPID: TP0001684E03

NAME: 2,4-Dinitrophenol

CAS NO: 51-28-5

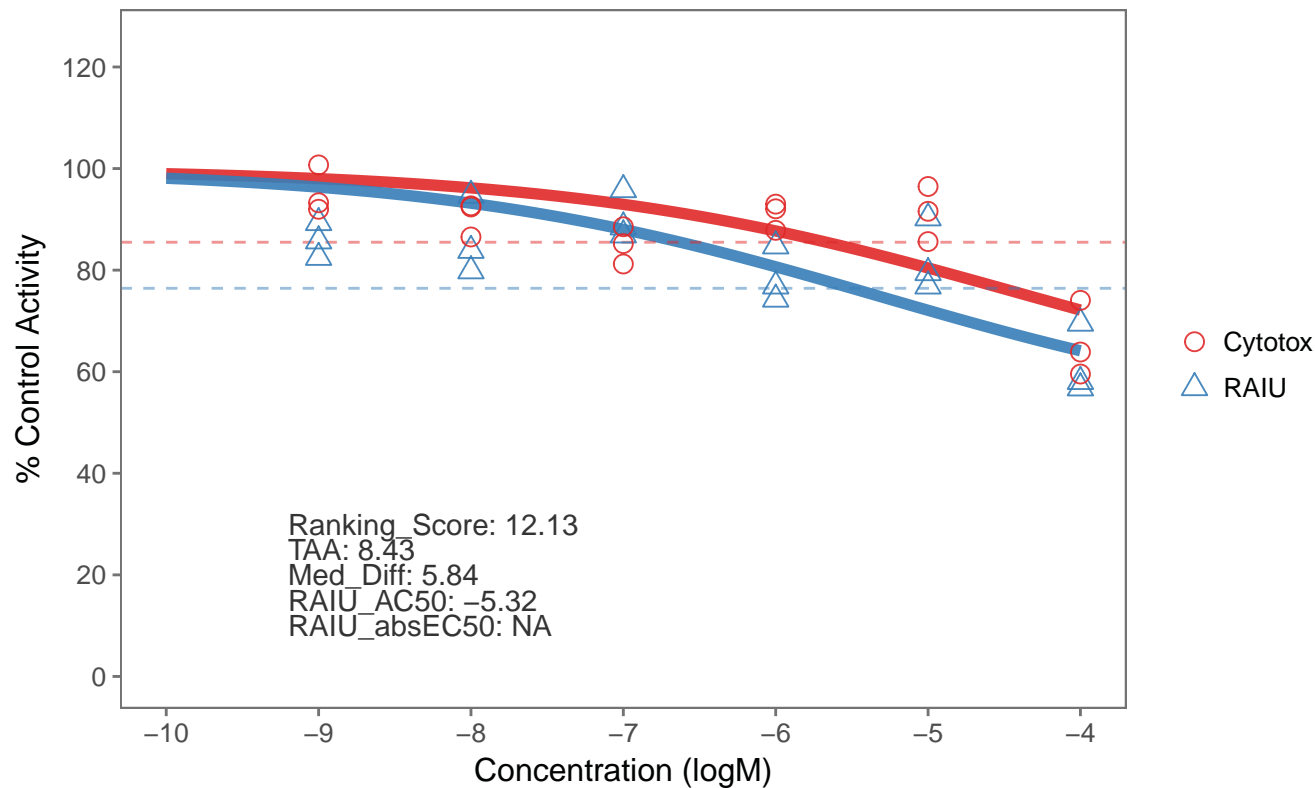

108. SPID: TP0001678G04  
NAME: Sodium dodecylbenzenesulfonate  
CAS NO: 25155-30-0

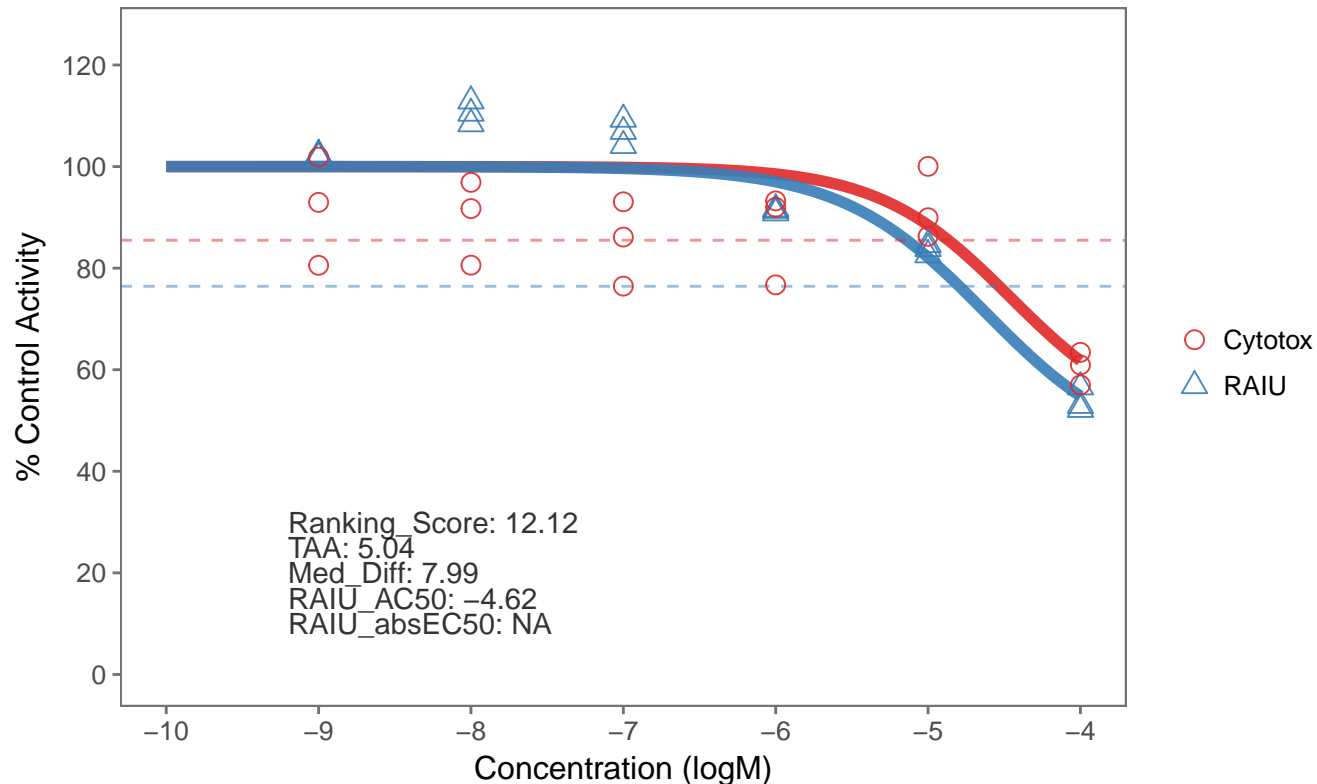

109. SPID: TP0001681F09  
NAME: PFOSA  
CAS NO: 754-91-6

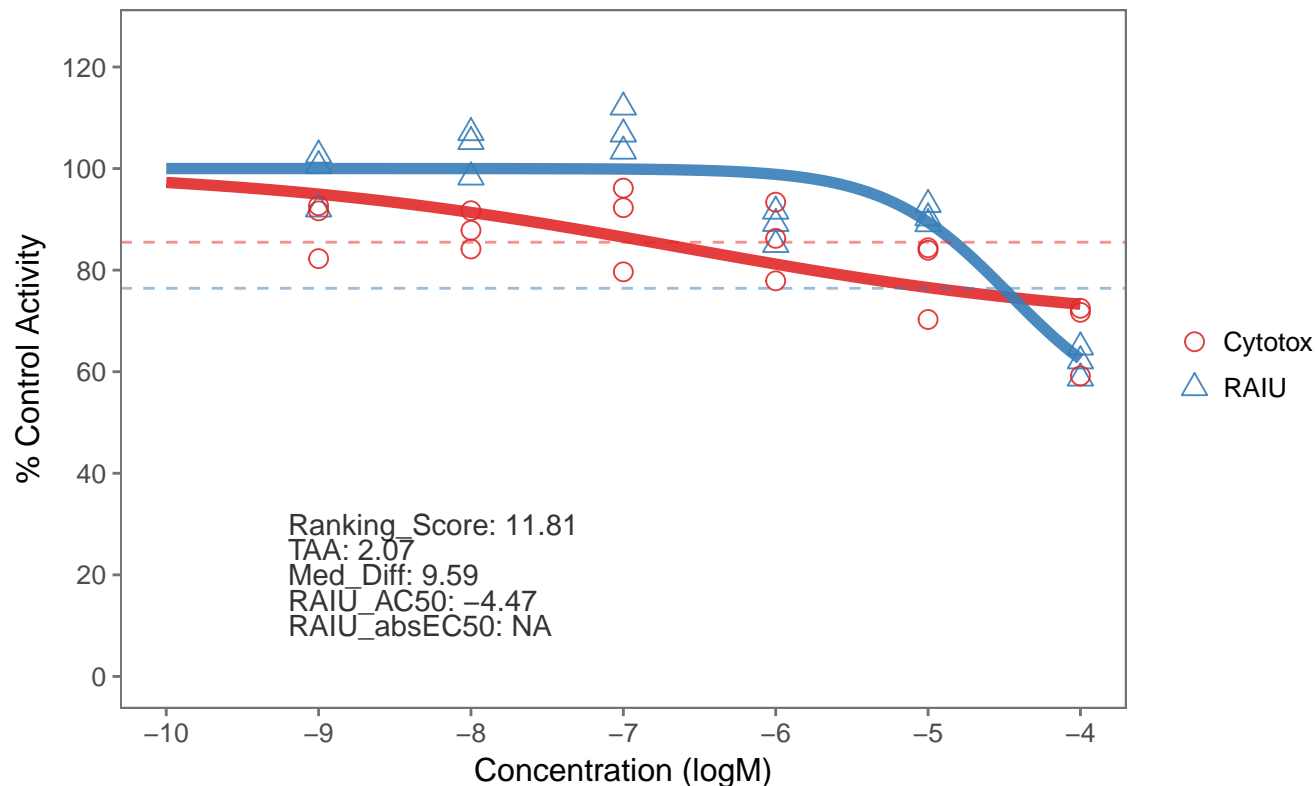

110. SPID: TP0001686F07  
NAME: 2,6-Di-tert-butylphenol  
CAS NO: 128-39-2

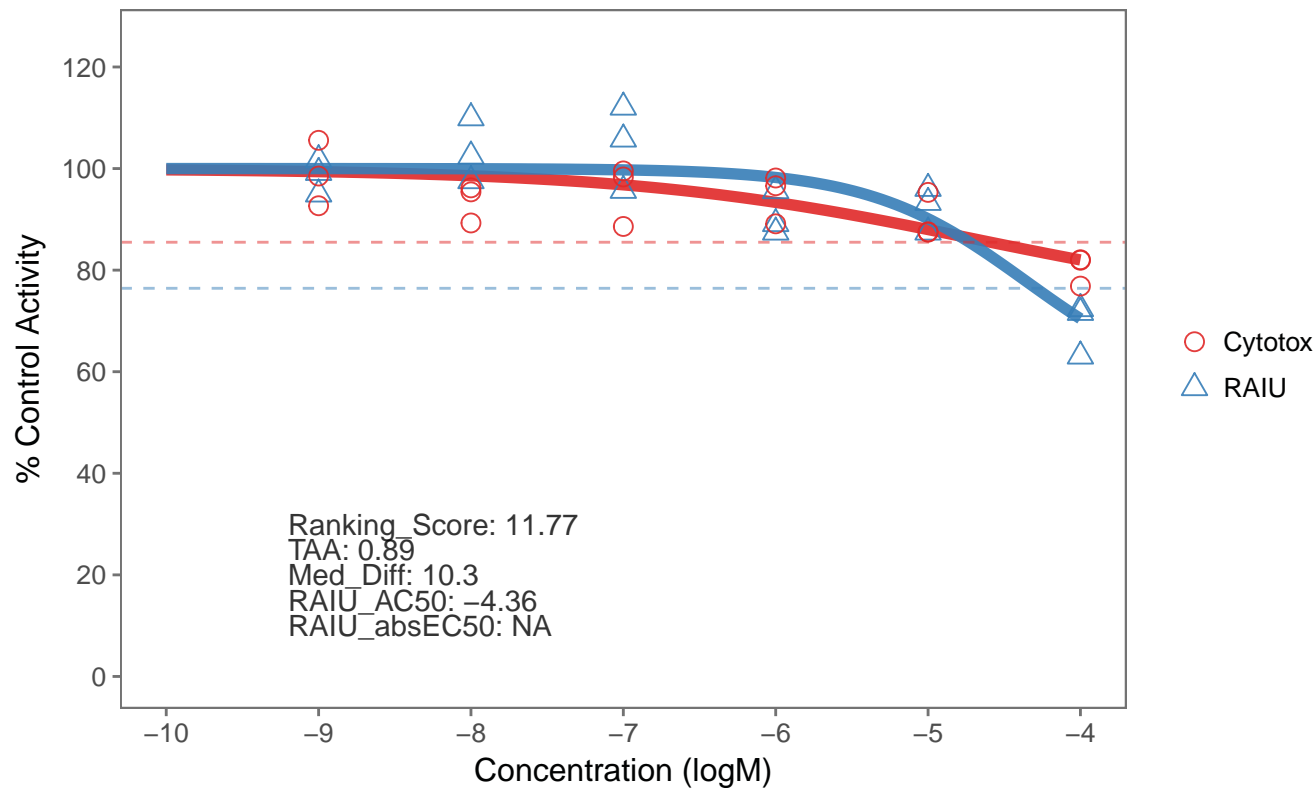

111. SPID: TP0001682C03  
NAME: p-Bromodiphenyl ether  
CAS NO: 101-55-3

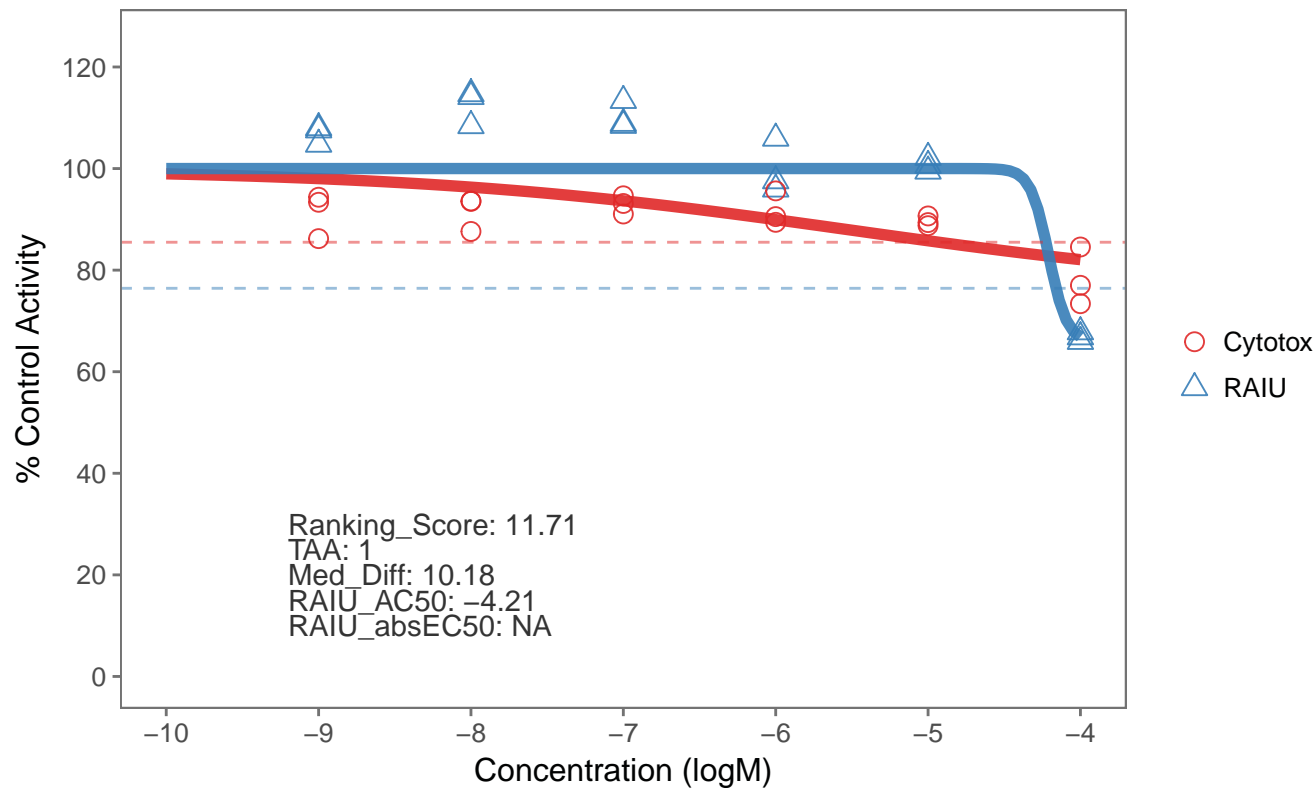

112. SPID: TP0001685E09  
NAME: FR150011  
CAS NO: 149413-74-1

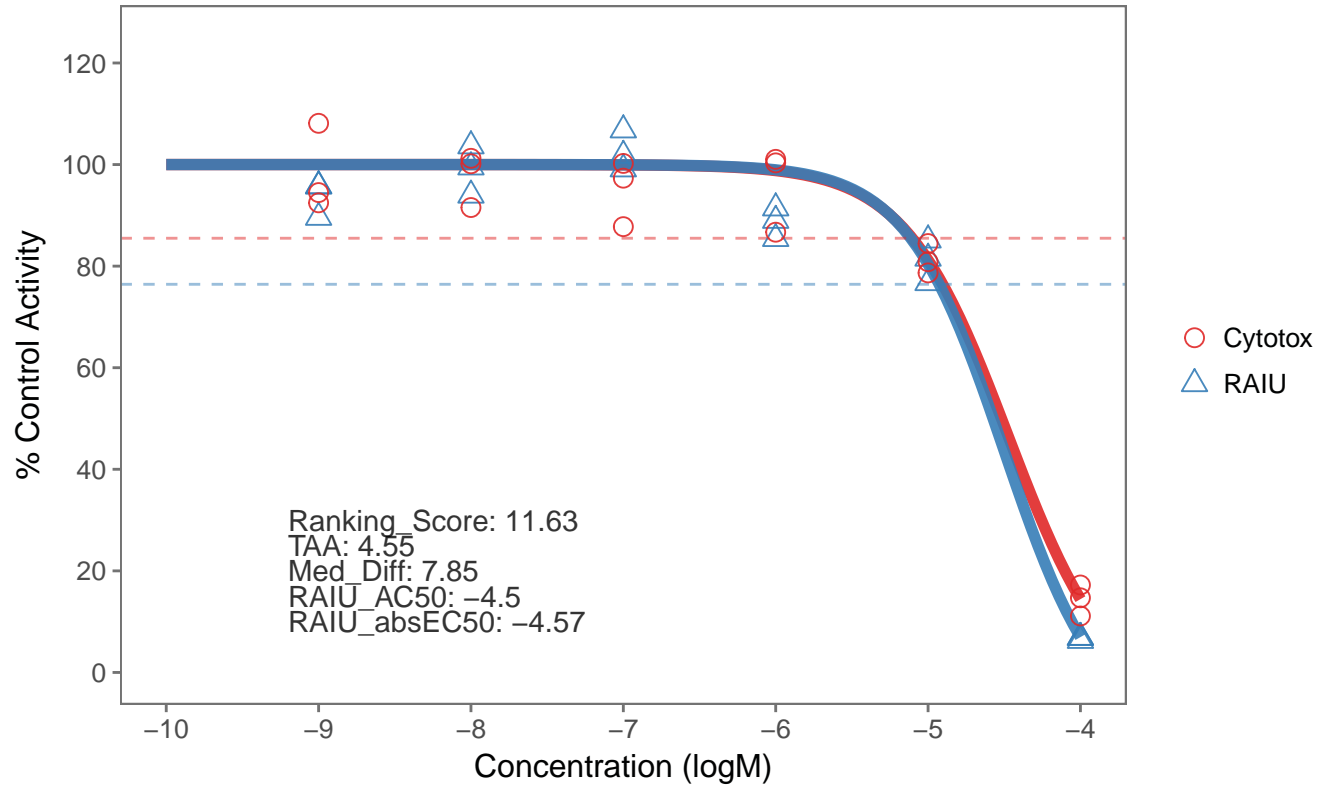



113. SPID: TP0001683F05  
NAME: SSR150106  
CAS NO: NOCAS\_47362

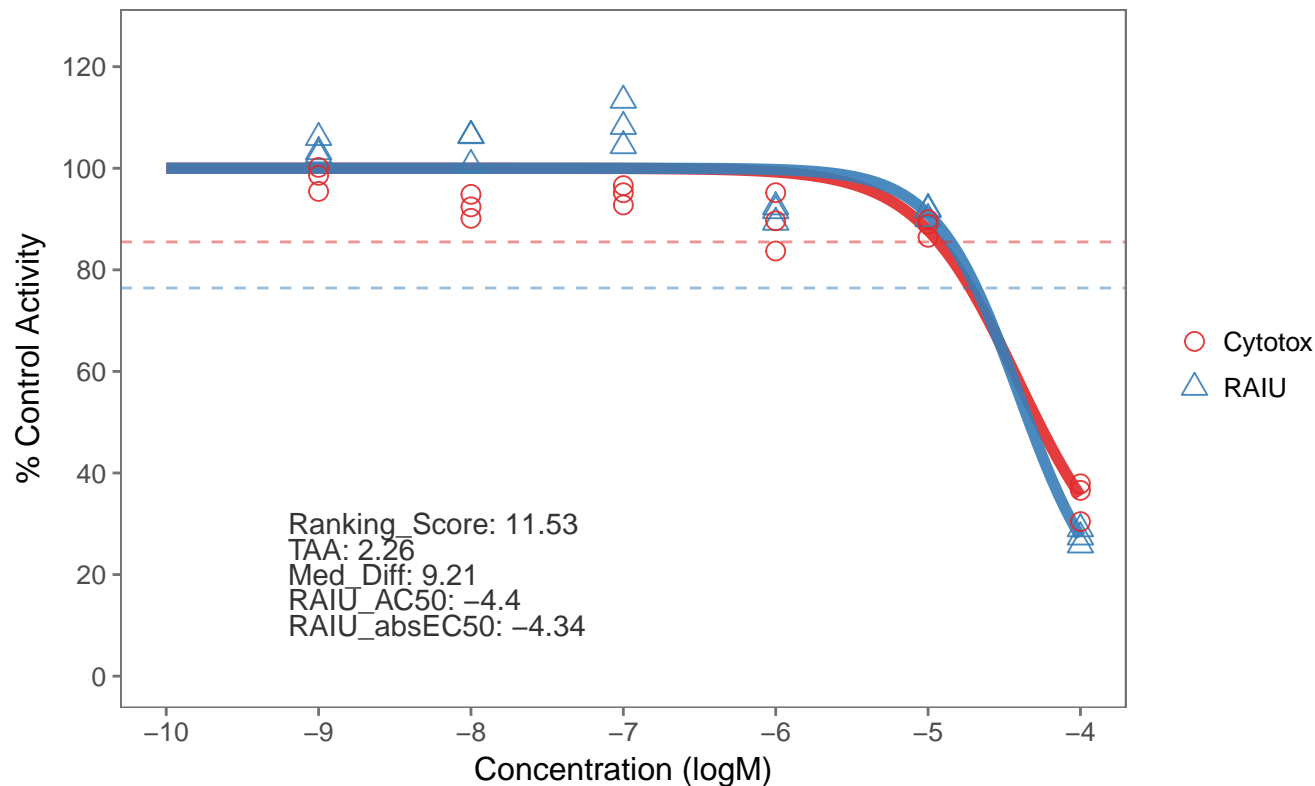

114. SPID: TP0001679A01

NAME: Mancozeb

CAS NO: 8018-01-7

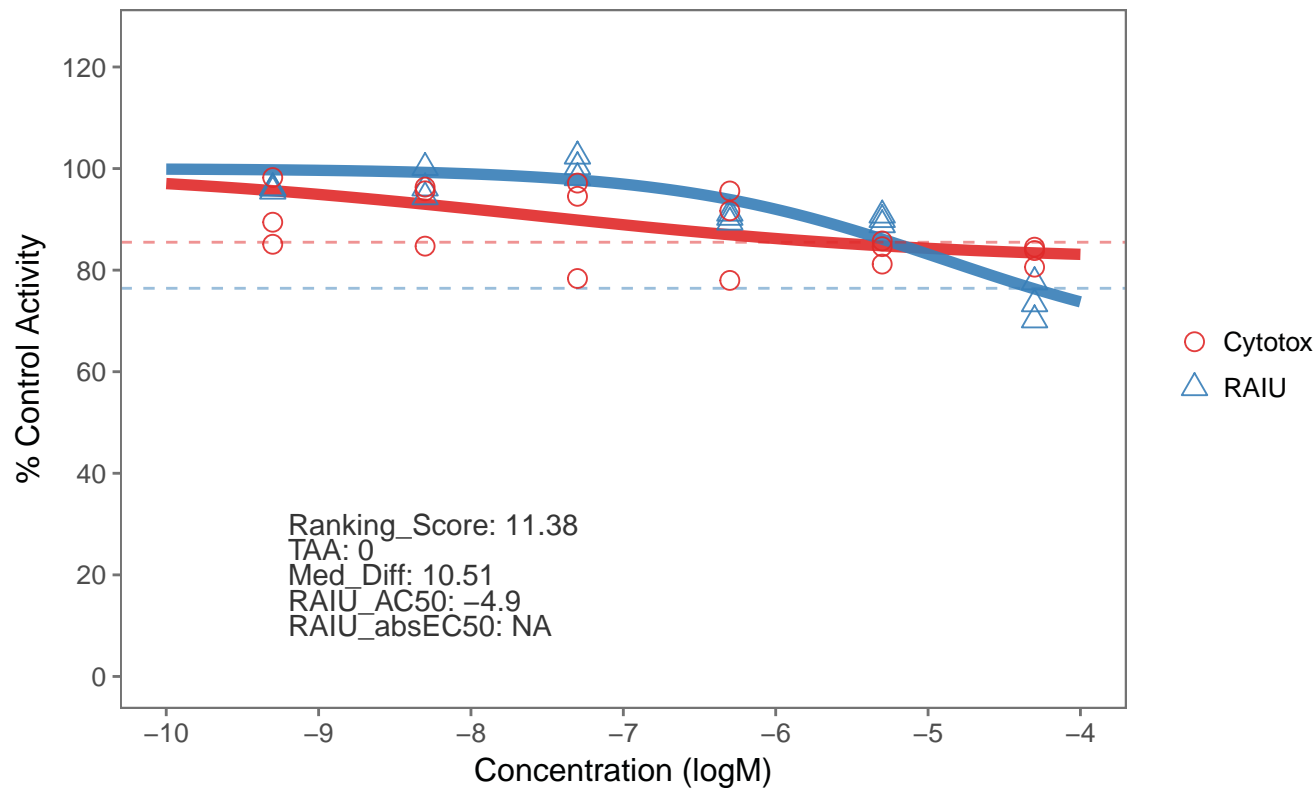

115. SPID: TP0001687F01

NAME: Tamoxifen

CAS NO: 10540-29-1

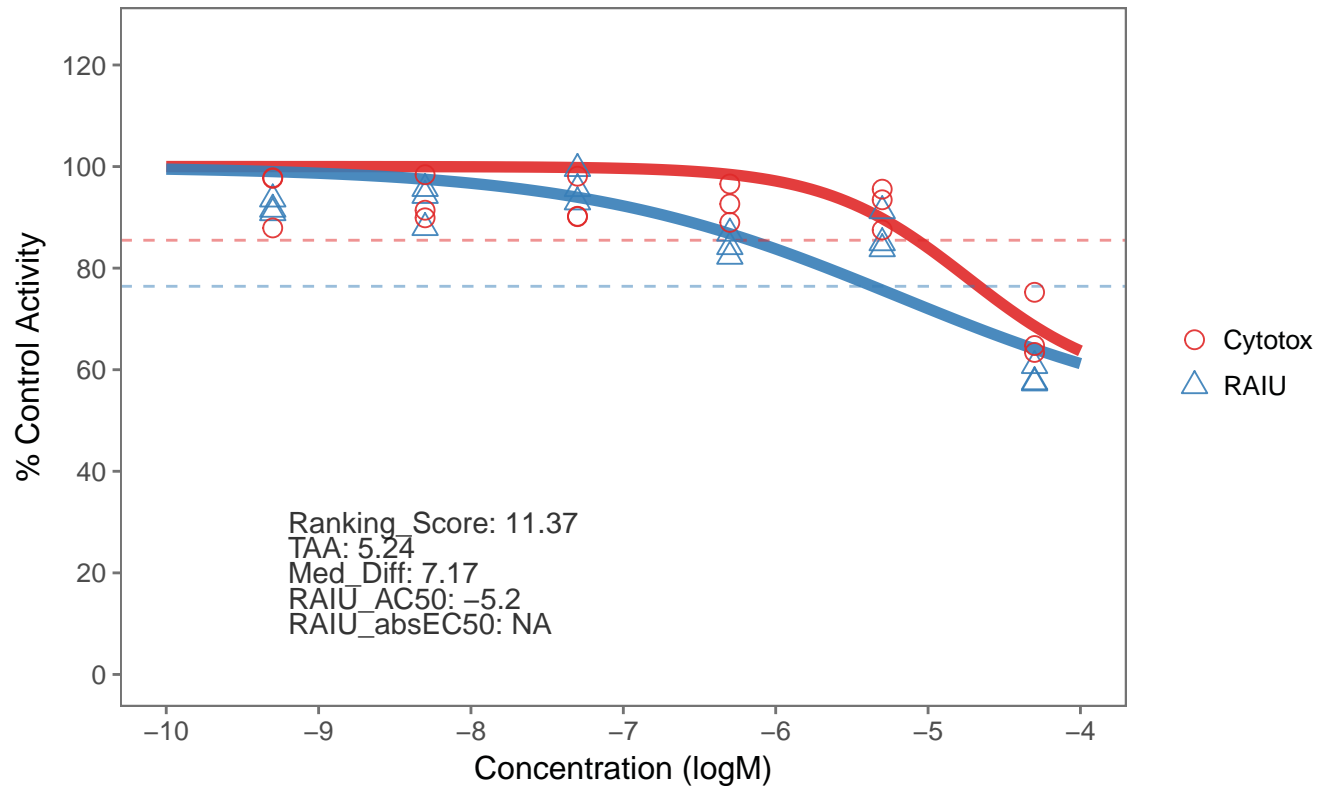

116. SPID: TP0001684C09  
NAME: PharmaGSID\_48514  
CAS NO: NOCAS\_48514

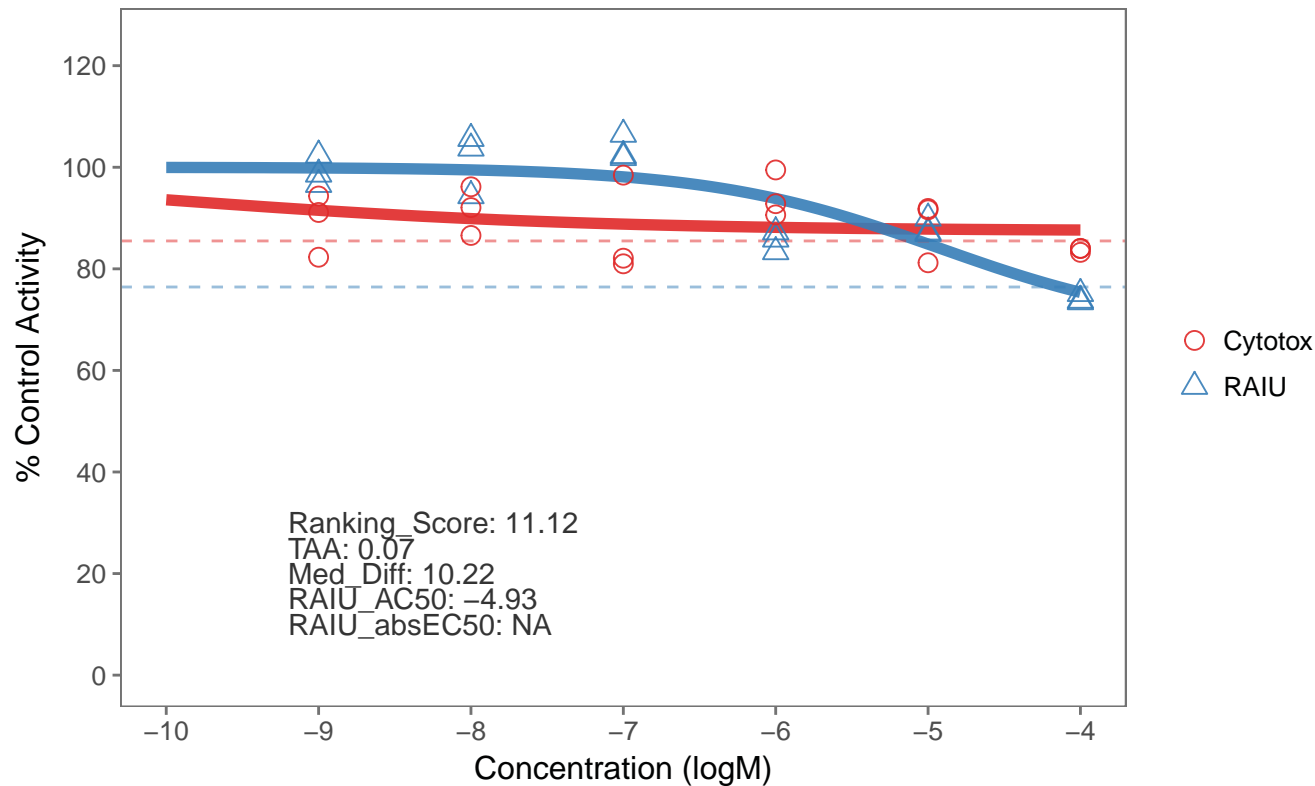

117. SPID: TP0001677D04

NAME: Fenaminosulf

CAS NO: 140-56-7

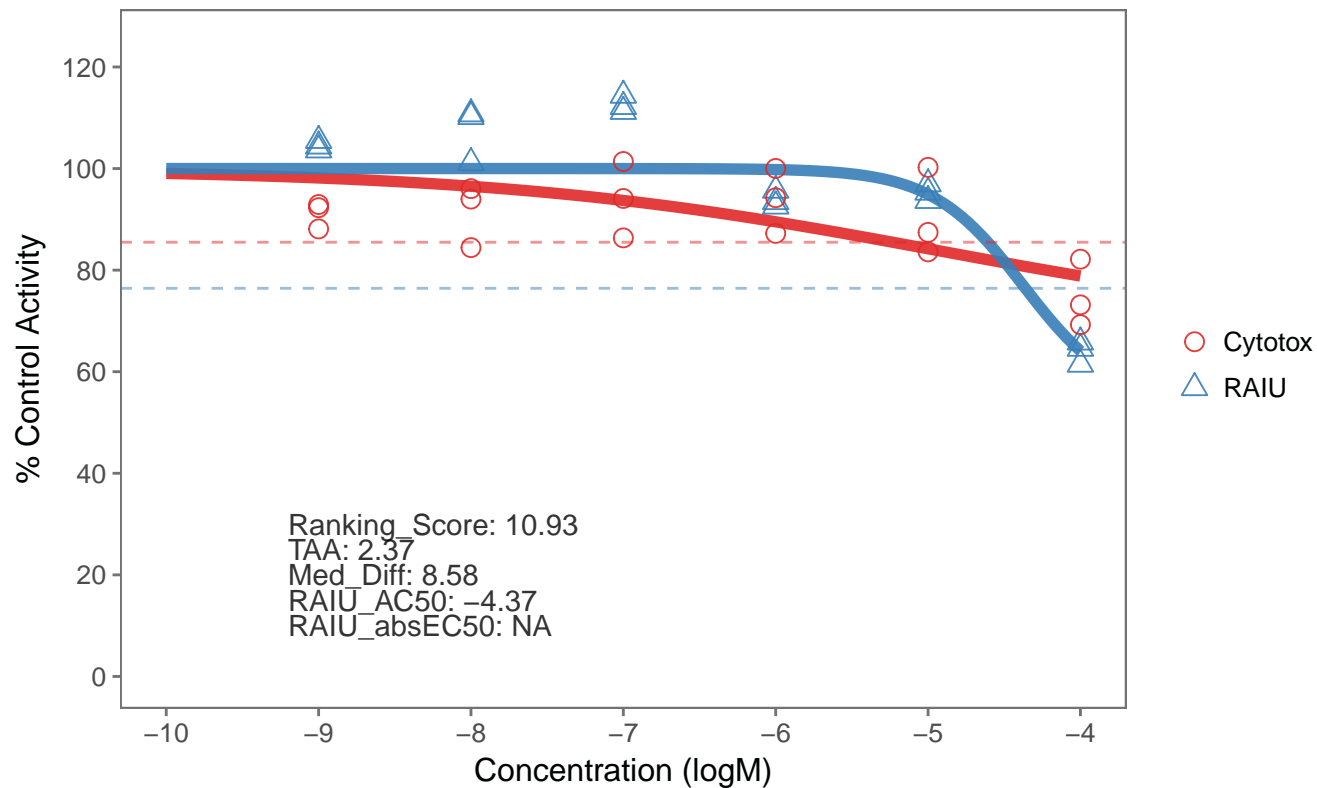

118. SPID: TP0001689B04  
NAME: Hexane-1,6-diyl dibenzoate  
CAS NO: 22915-73-7

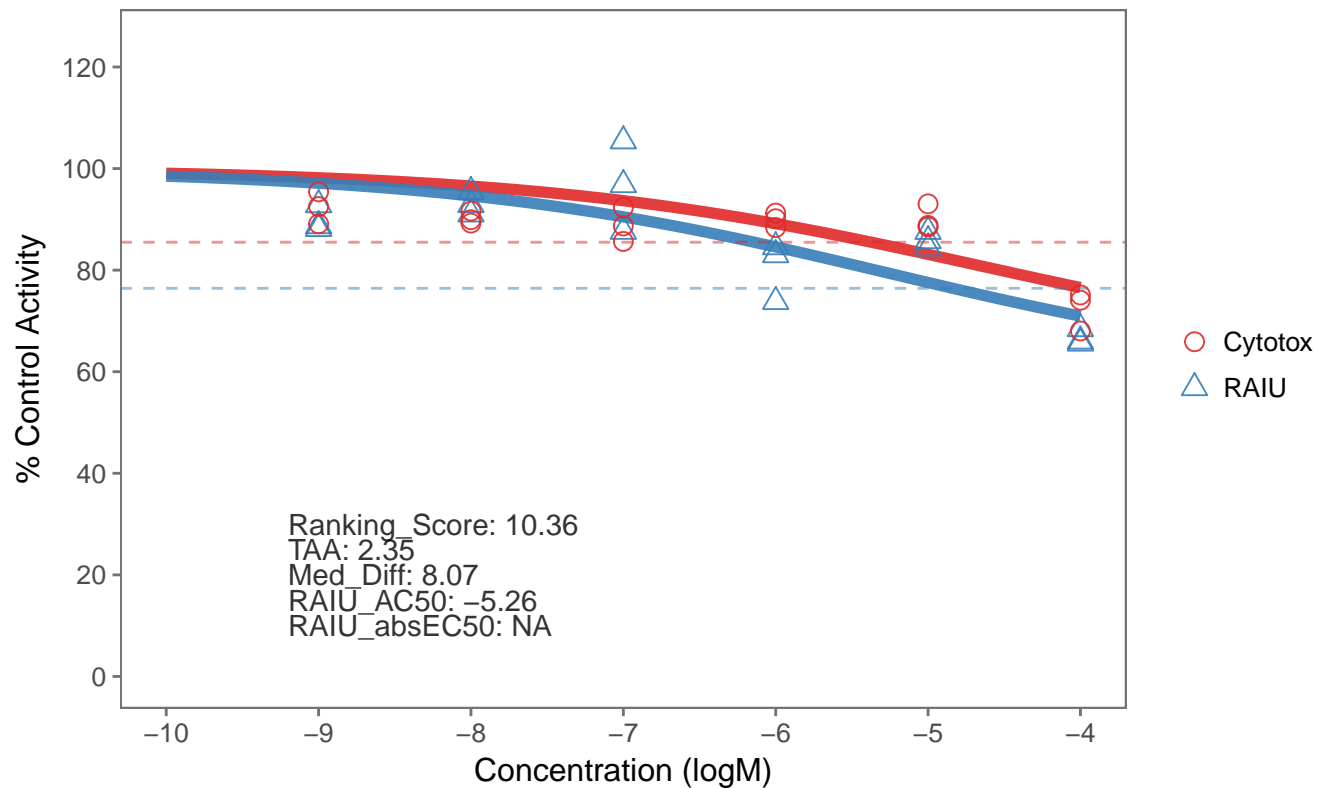

119. SPID: TP0001687B10  
NAME: C.I. Solvent Yellow 14  
CAS NO: 842-07-9

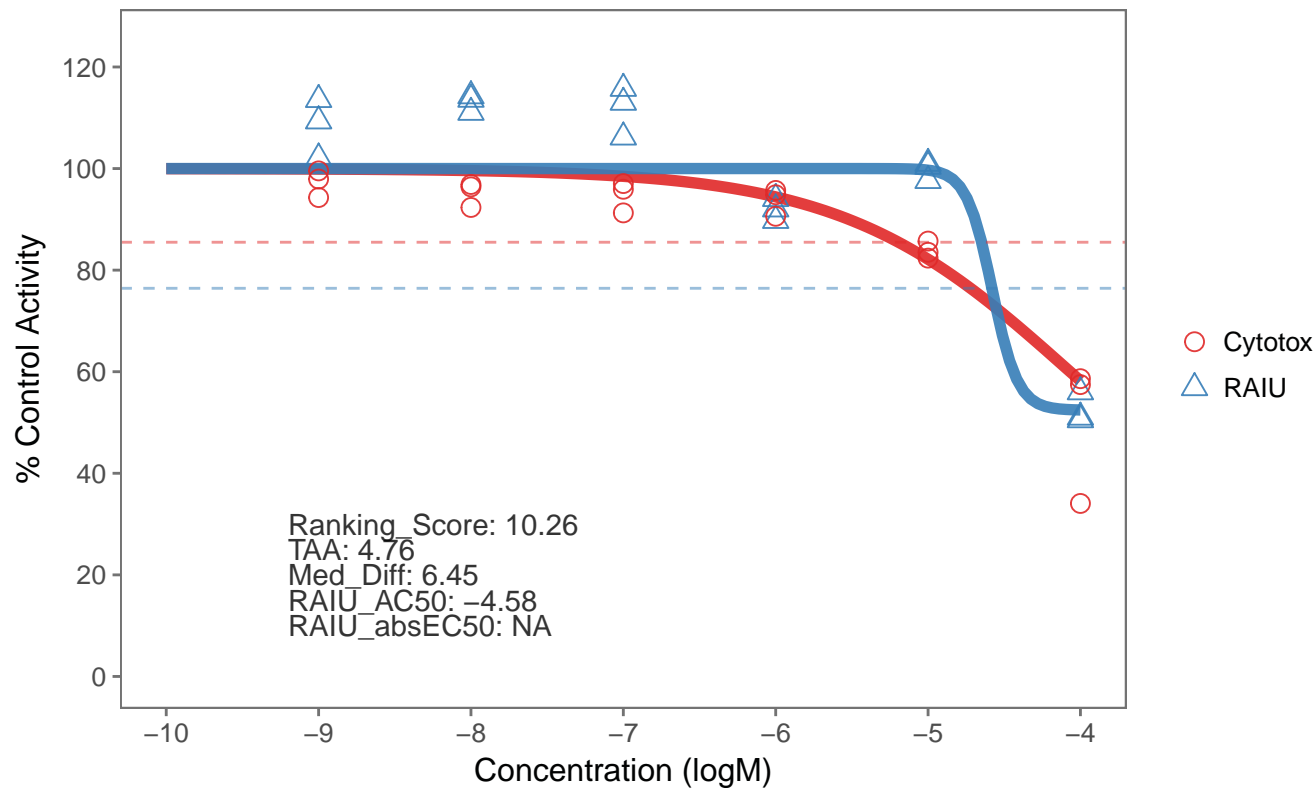

120. SPID: TP0001684B10

NAME: 5HPP-33

CAS NO: 105624-86-0

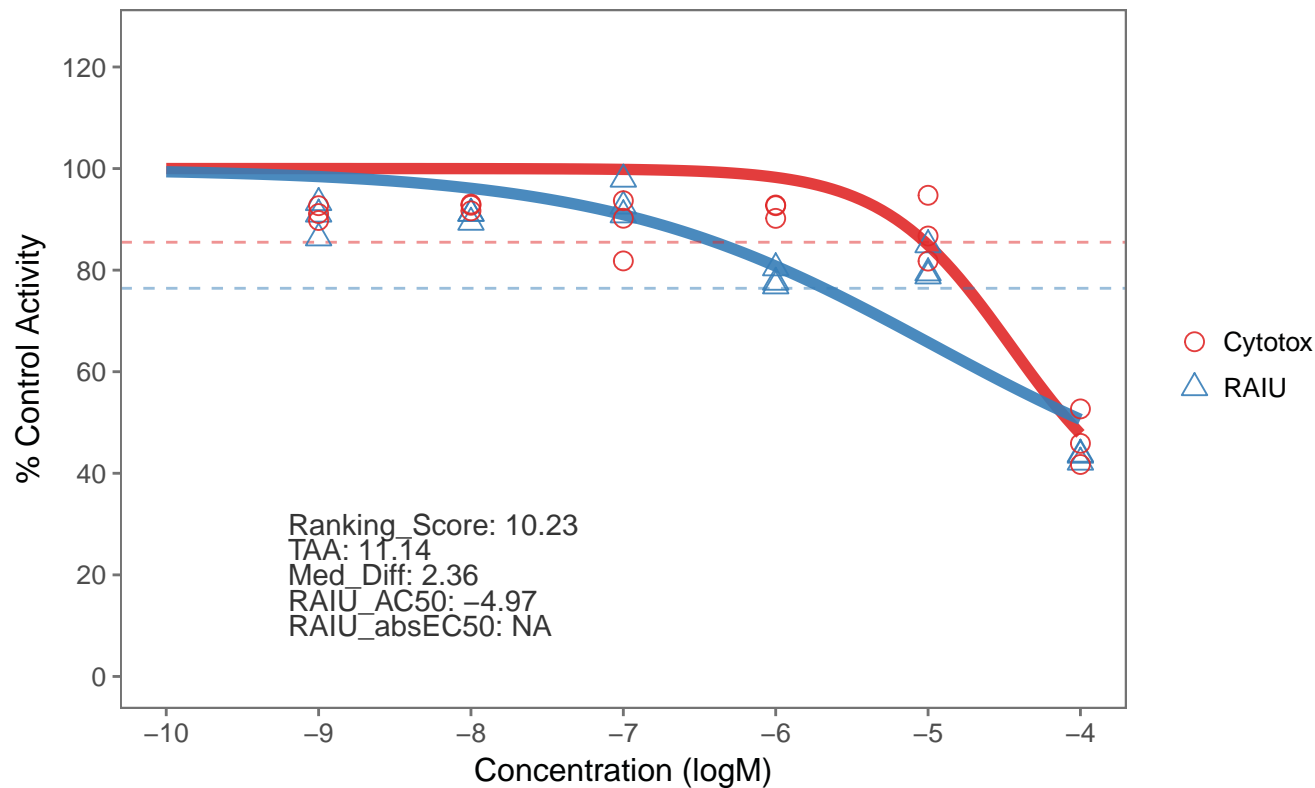



121. SPID: TP0001687E05  
NAME: Di(propylene glycol) dibenzoate  
CAS NO: 27138-31-4

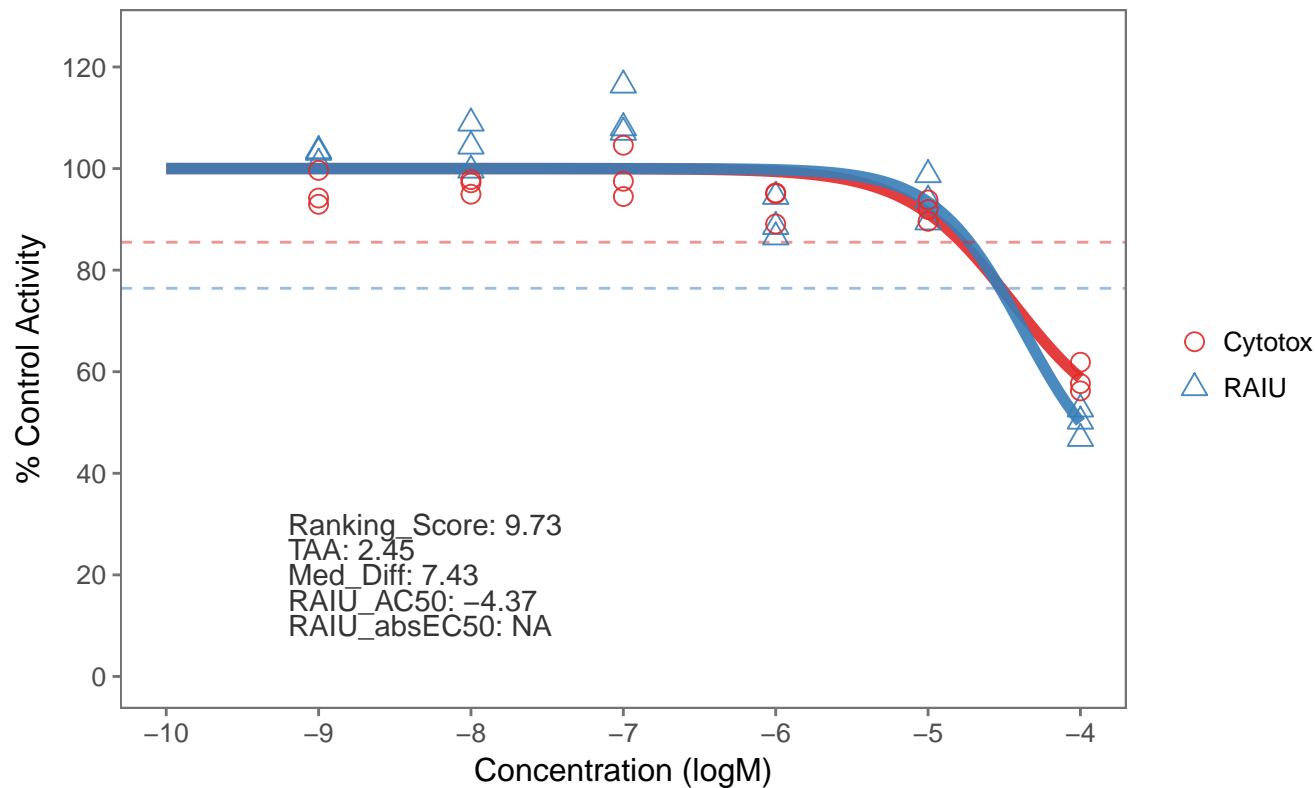

122. SPID: TP0001688G02  
NAME: 3,3',5,5'-Tetrabromobisphenol A  
CAS NO: 79-94-7

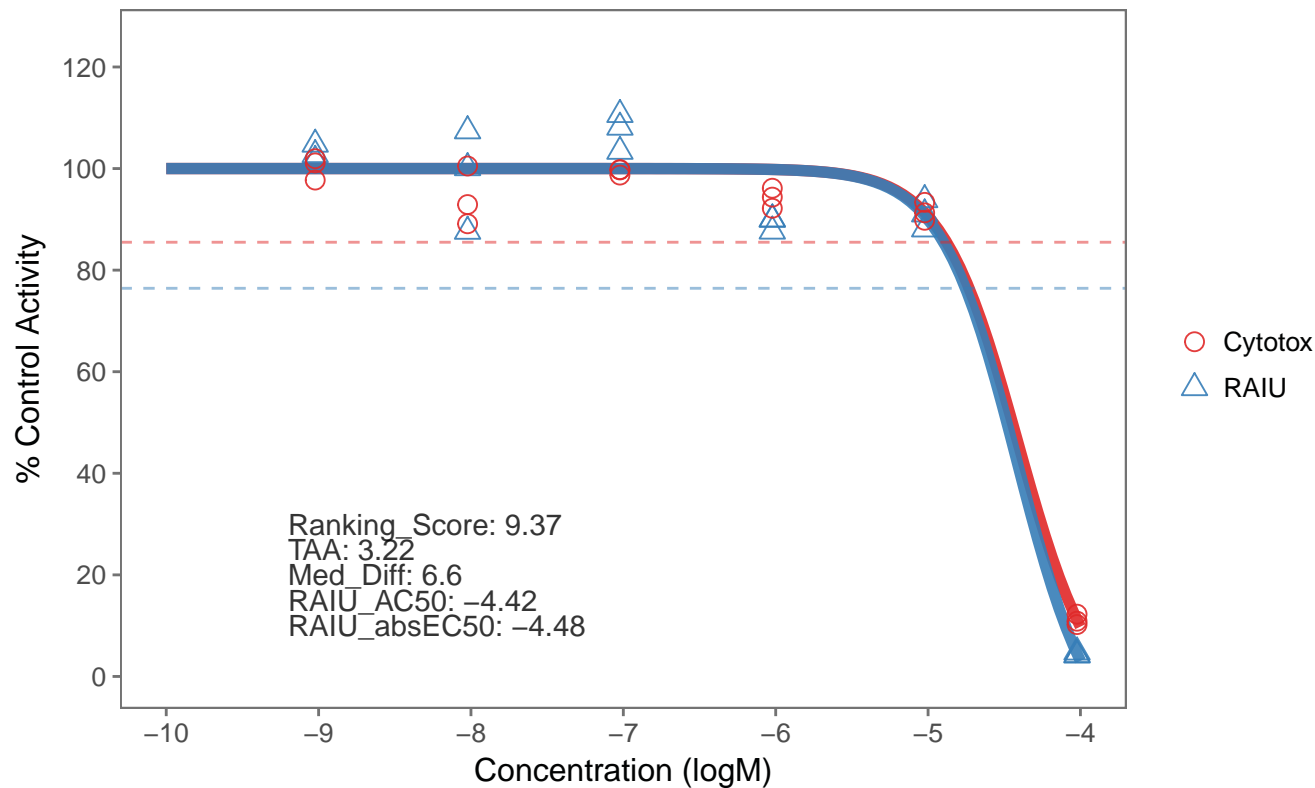

123. SPID: TP0001683F11  
NAME: 2-Benzylideneoctanal  
CAS NO: 101-86-0

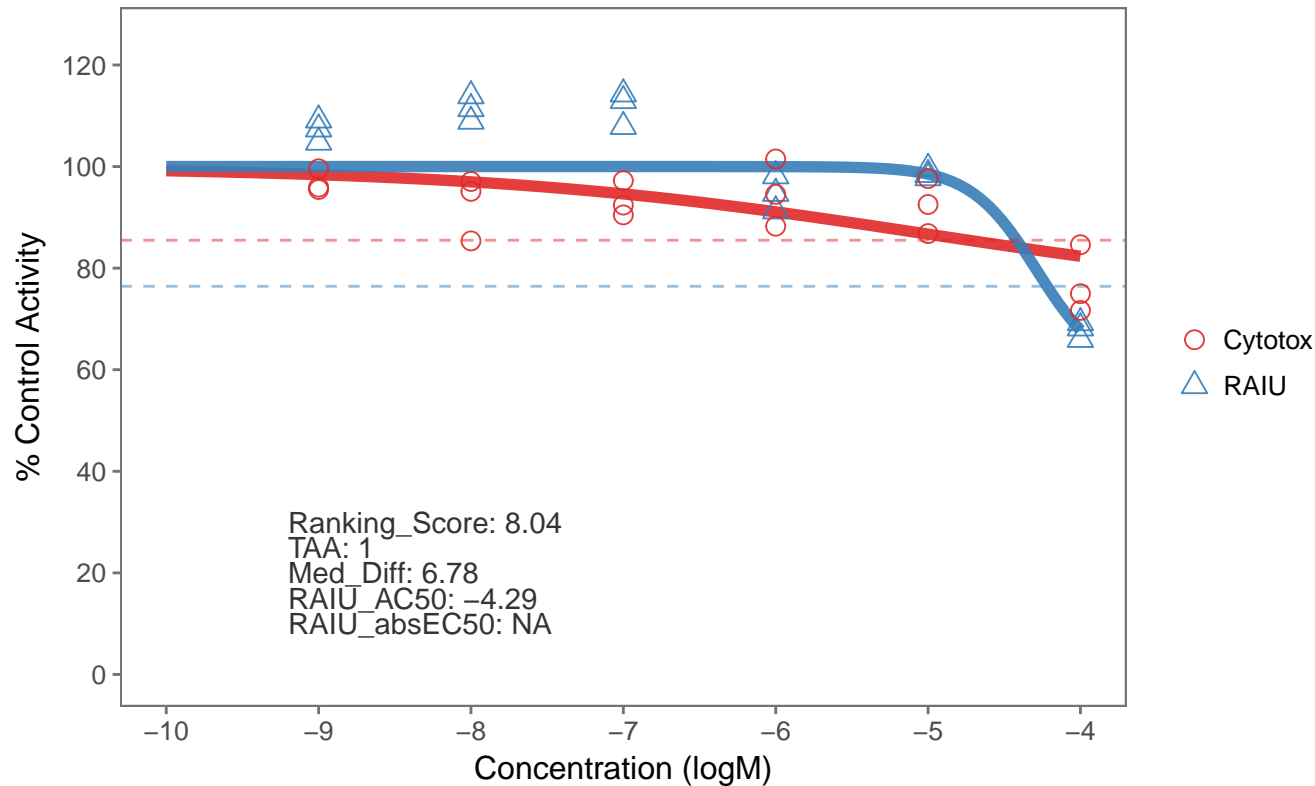

124. SPID: TP0001681D07  
NAME: SSR126768  
CAS NO: NOCAS\_47379

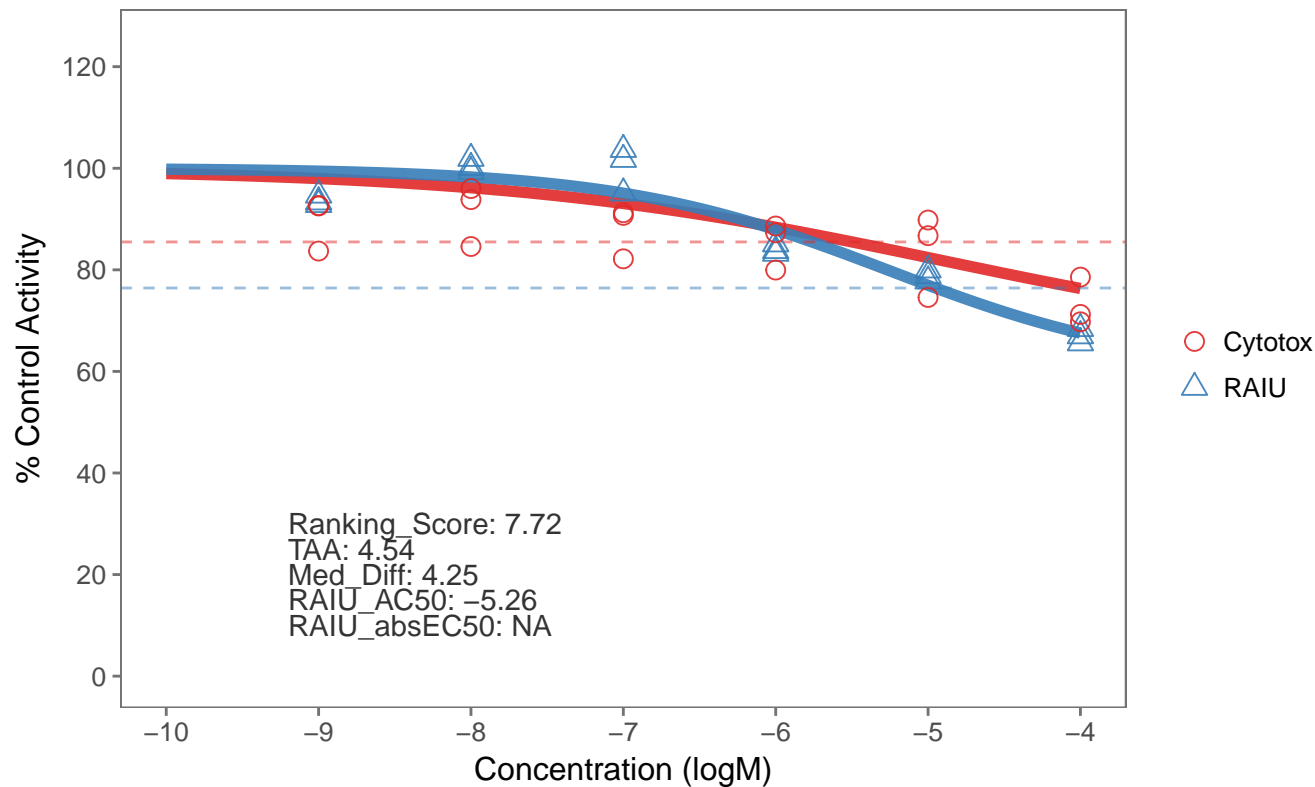

125. SPID: TP0001677D11

NAME: Celecoxib

CAS NO: 169590-42-5

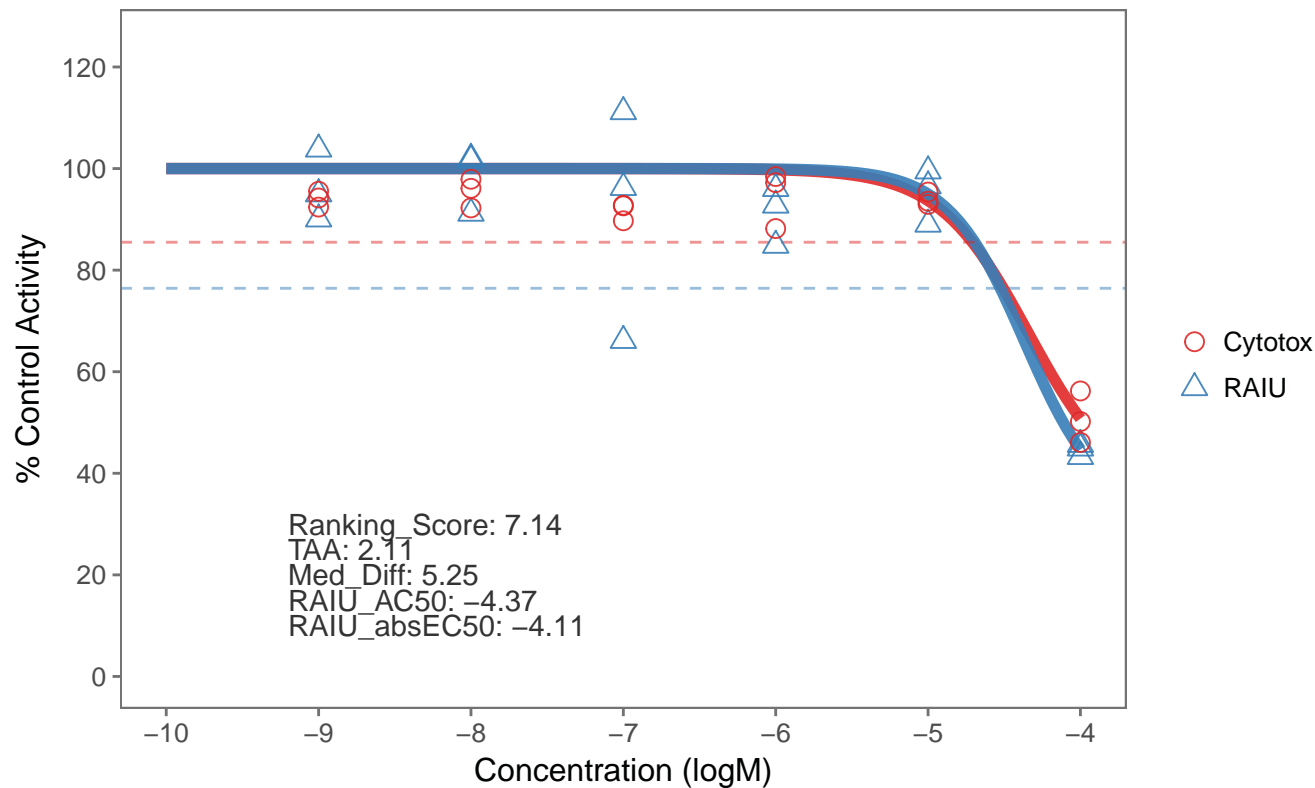

126. SPID: TP0001687F07  
NAME: SAR377142  
CAS NO: NOCAS\_47385

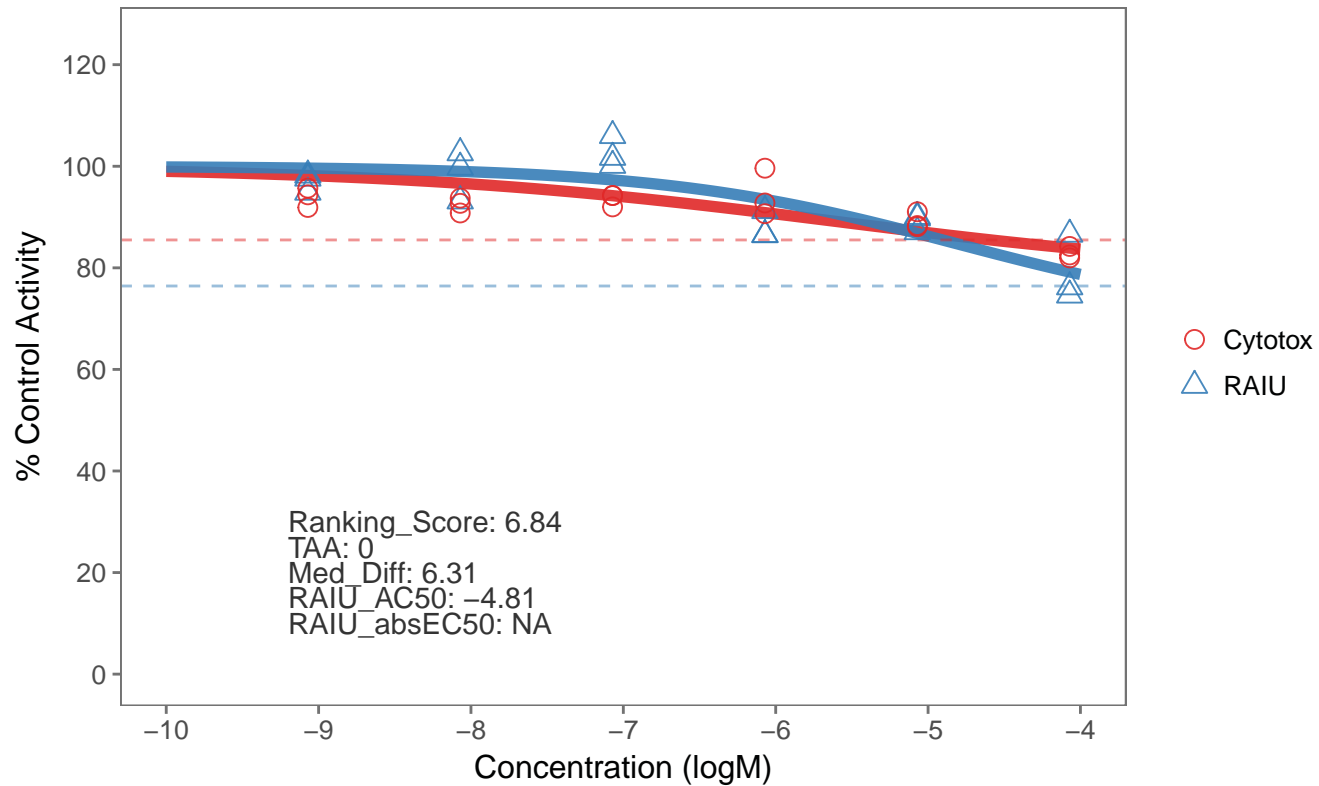

127. SPID: TP0001687F02  
NAME: 4-(Butan-2-yl)phenol  
CAS NO: 99-71-8

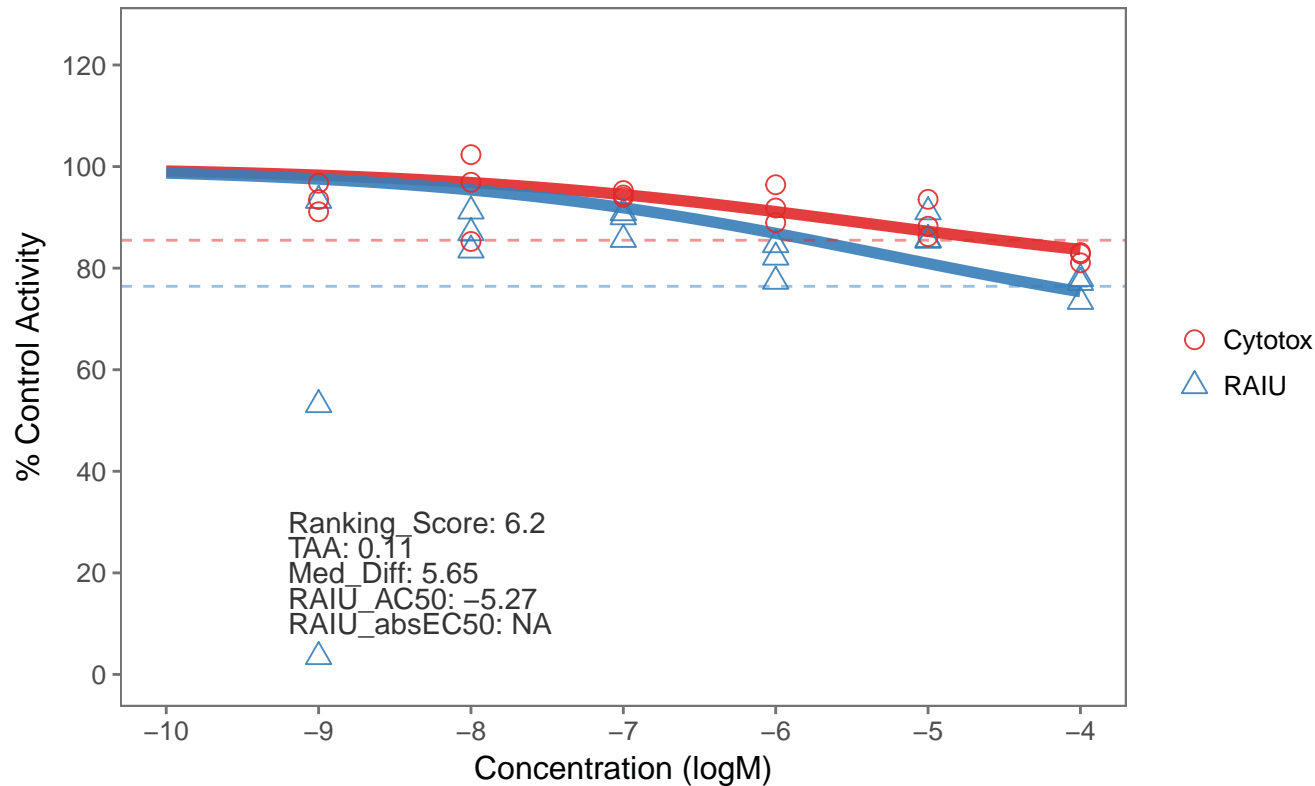

128. SPID: TP0001679C04

NAME: Mifepristone

CAS NO: 84371-65-3

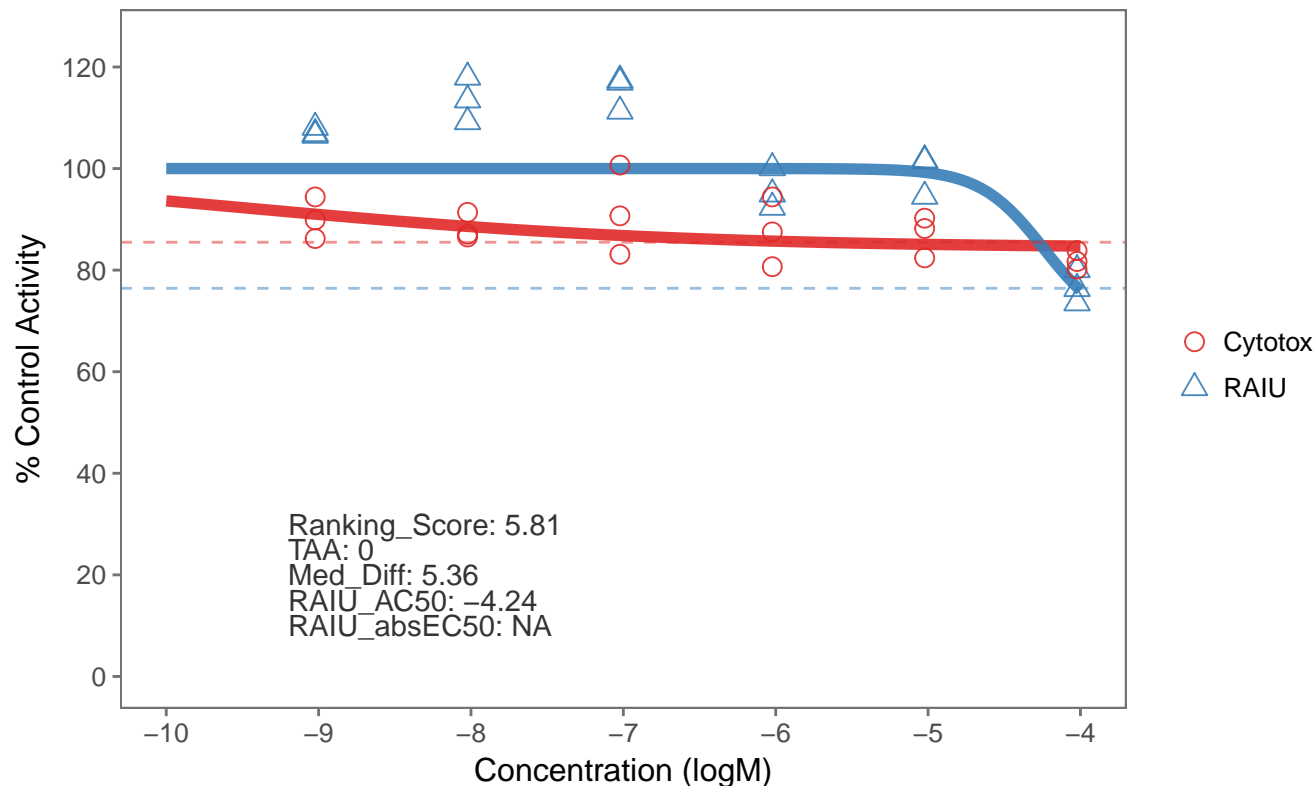



129. SPID: TP0001687B08

NAME: Ketoconazole

CAS NO: 65277-42-1

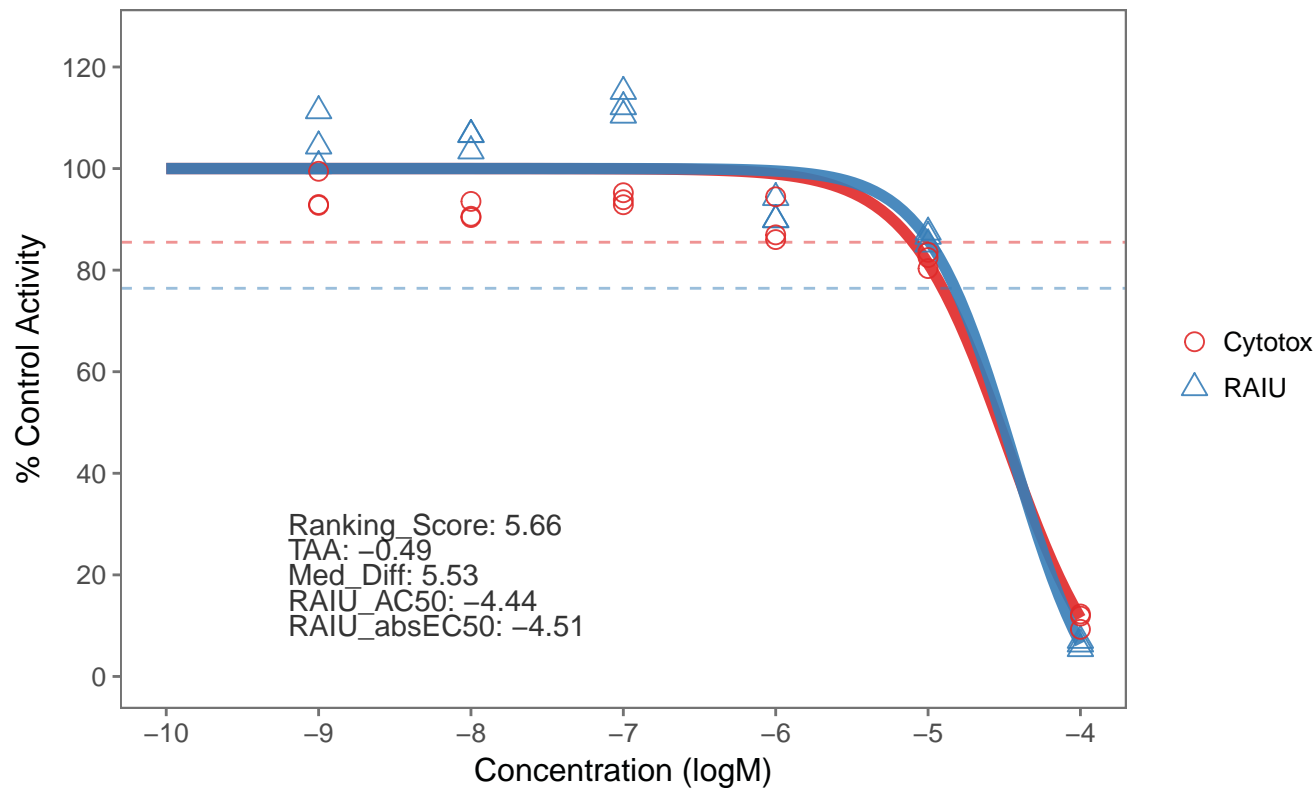

130. SPID: TP0001678B10  
NAME: Flutamide  
CAS NO: 13311-84-7

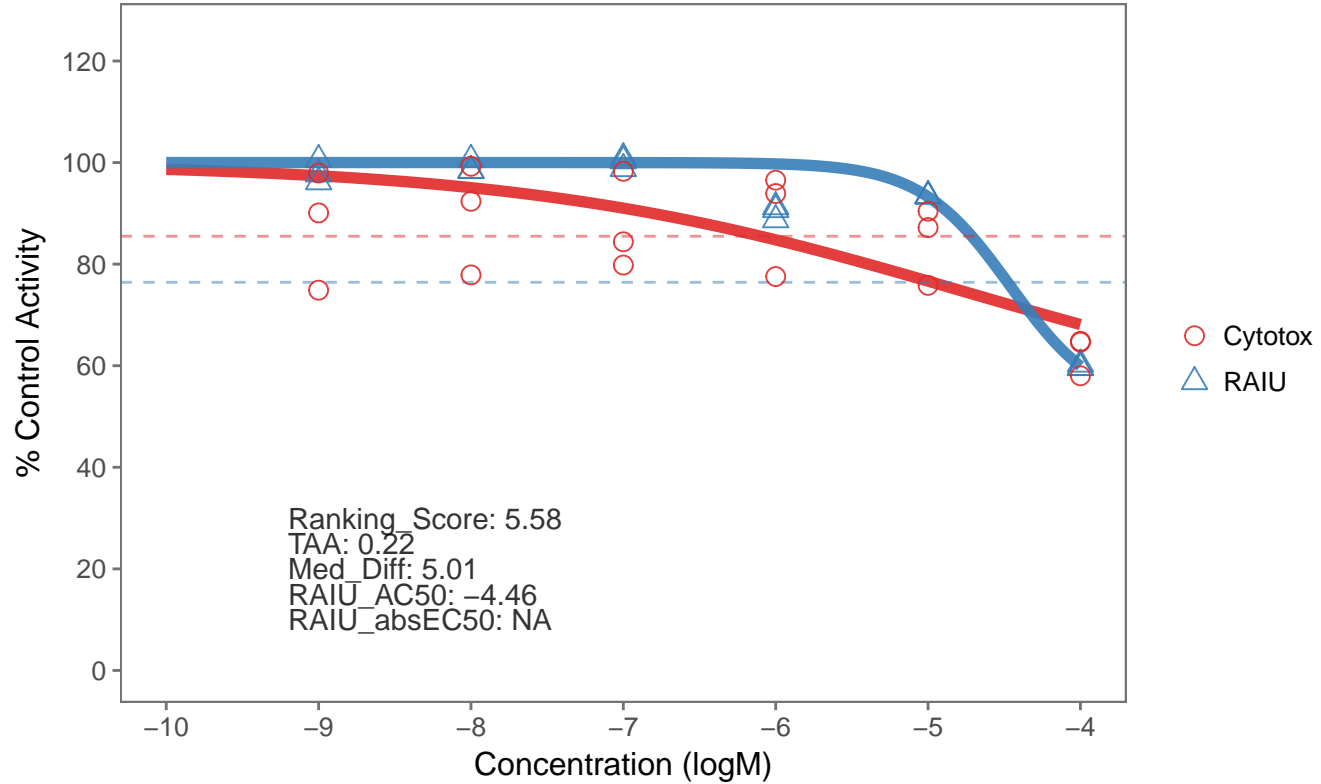

131. SPID: TP0001682C07

NAME: CP-100829

CAS NO: 135080-03-4

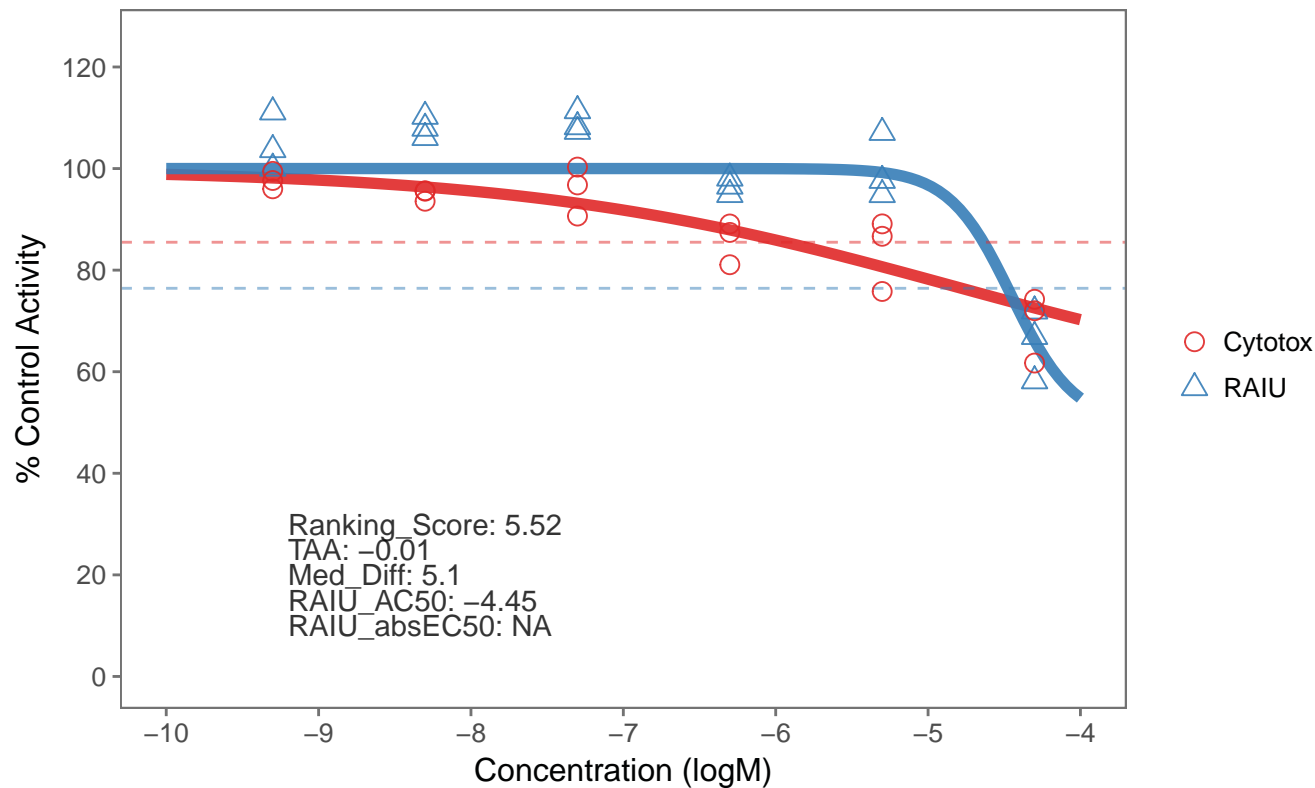

132. SPID: TP0001682B01

NAME: 9-Phenanthrol

CAS NO: 484-17-3

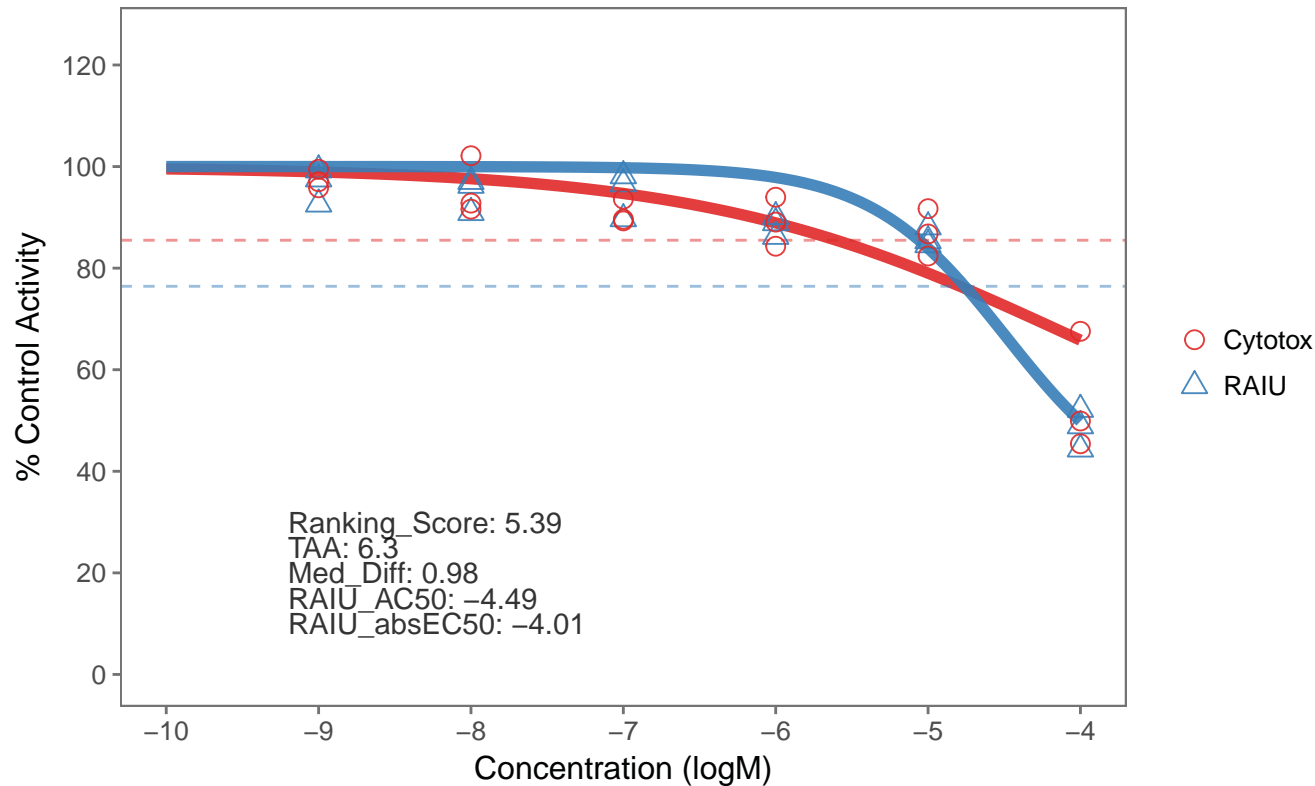

133. SPID: TP0001684G11

NAME: Bisphenol AF

CAS NO: 1478-61-1

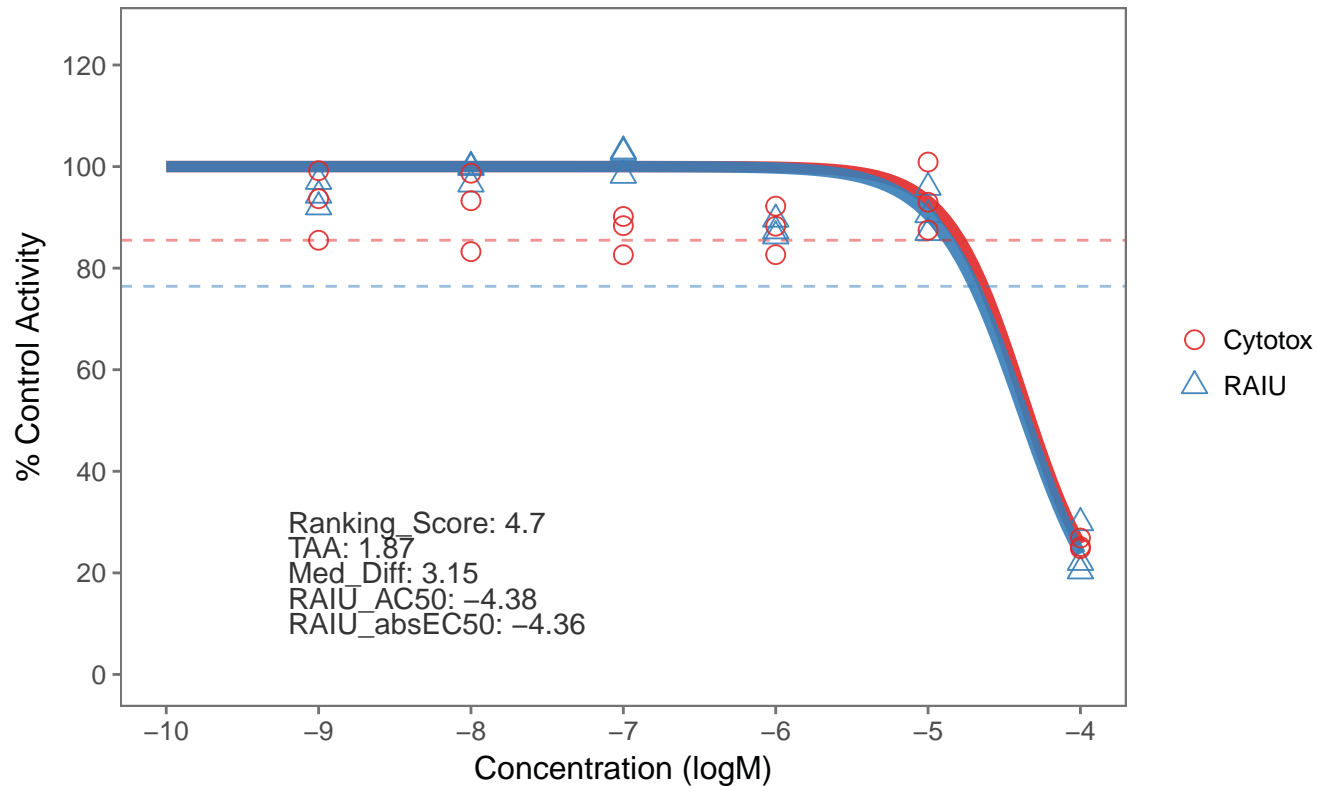

134. SPID: TP0001685B10

NAME: meso-Hexestrol

CAS NO: 84-16-2

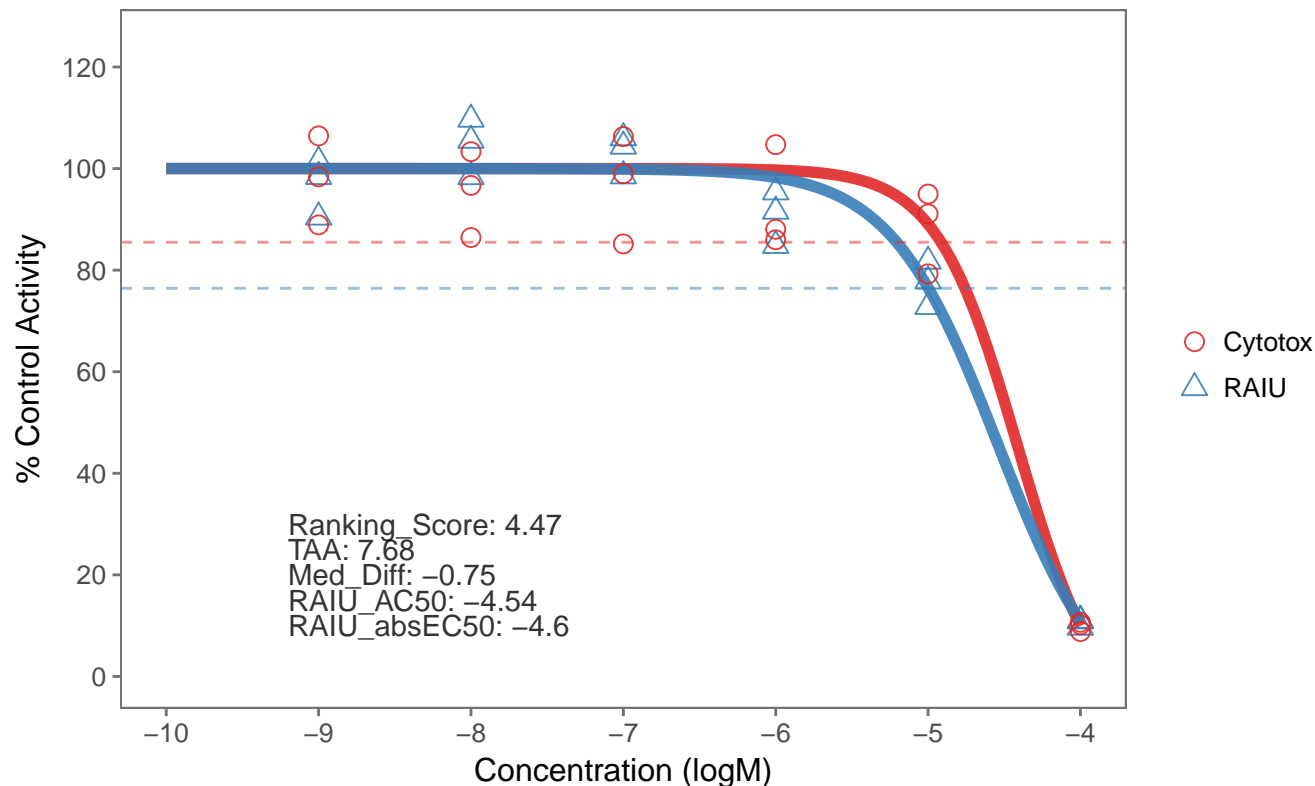

135. SPID: TP0001687F08

NAME: Michler's ketone

CAS NO: 90-94-8

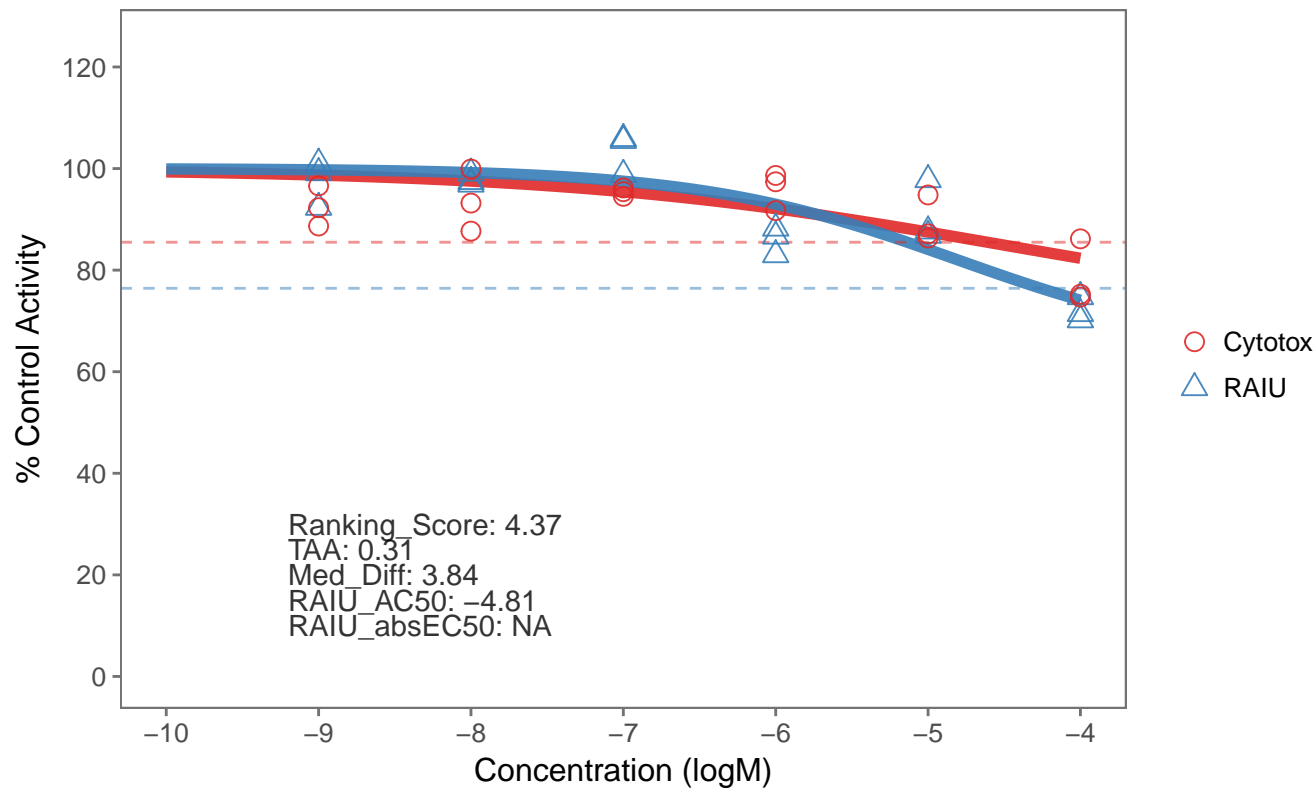

136. SPID: TP0001684C05

NAME: Azoxystrobin

CAS NO: 131860-33-8

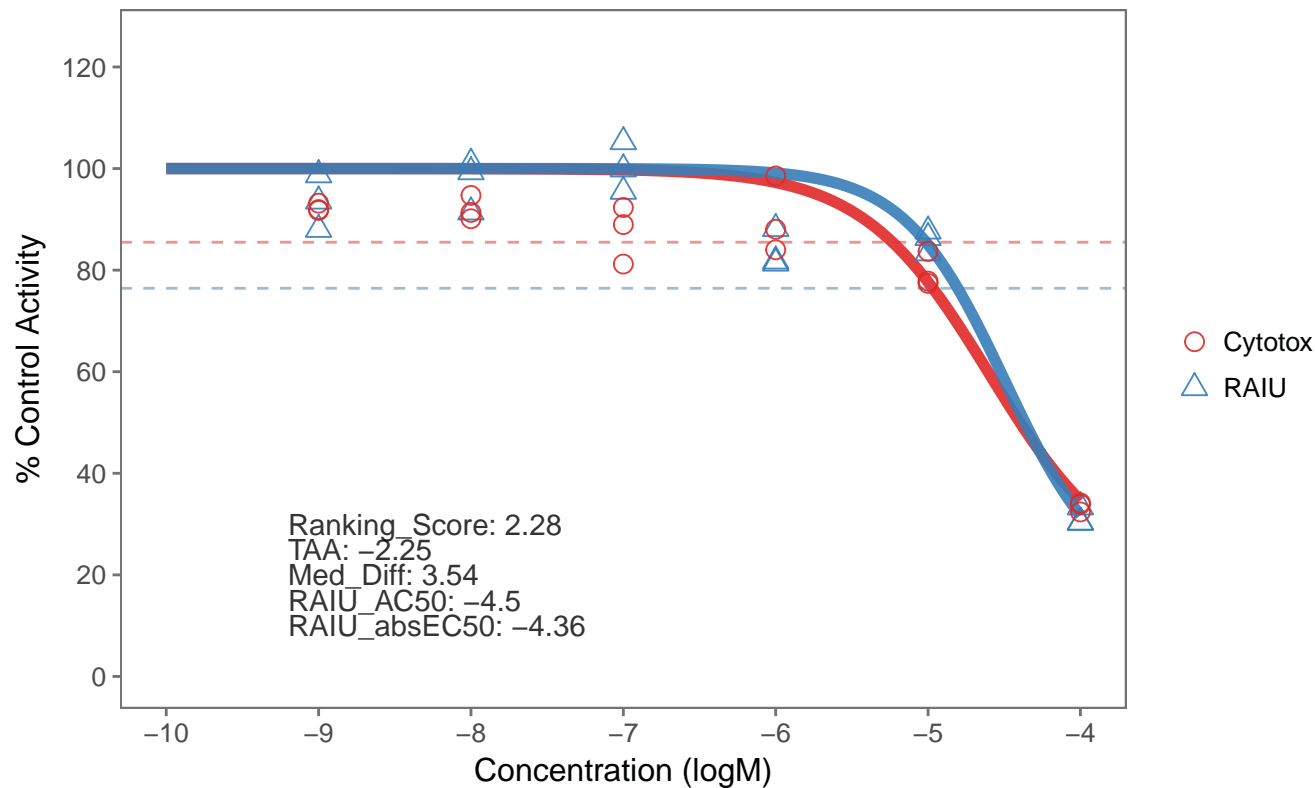



137. SPID: TP0001679D07

NAME: Bisphenol A

CAS NO: 80-05-7

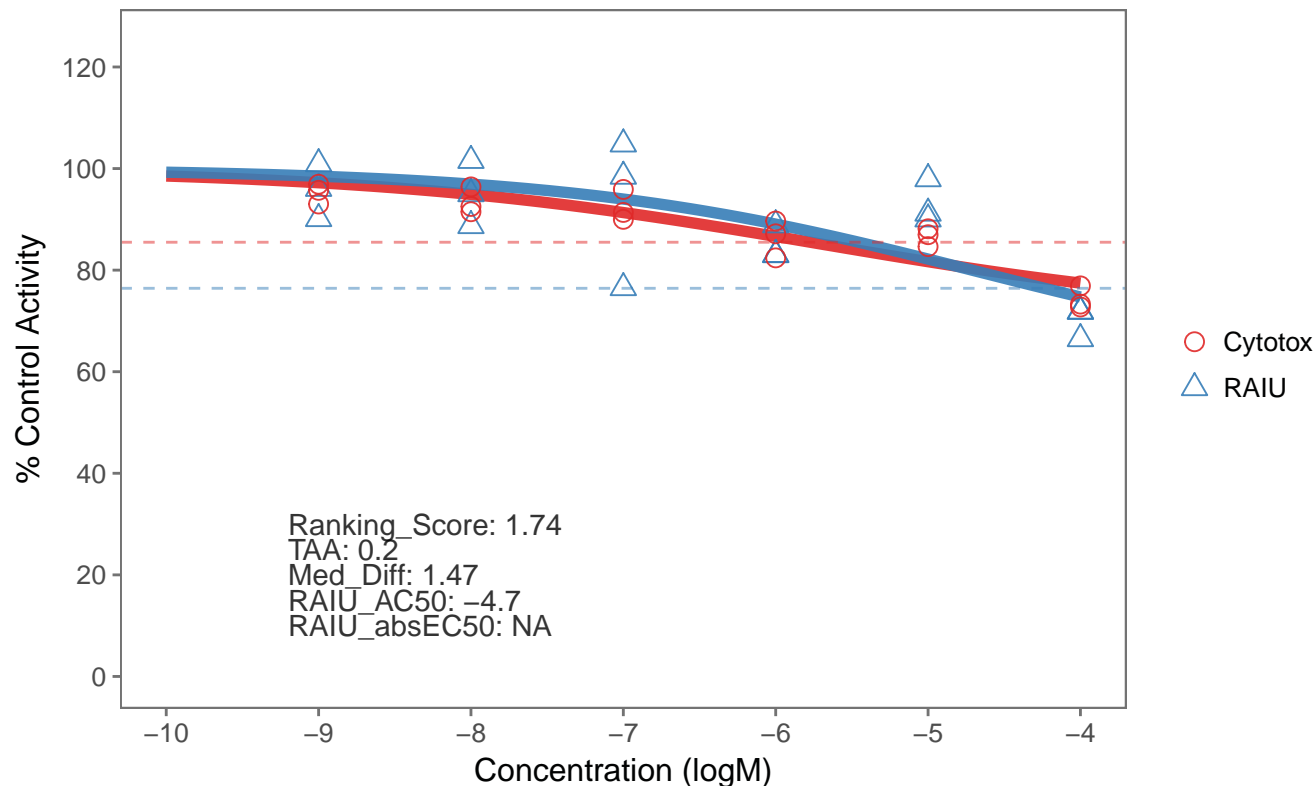

138. SPID: TP0001679C03

NAME: Octyl gallate

CAS NO: 1034-01-1

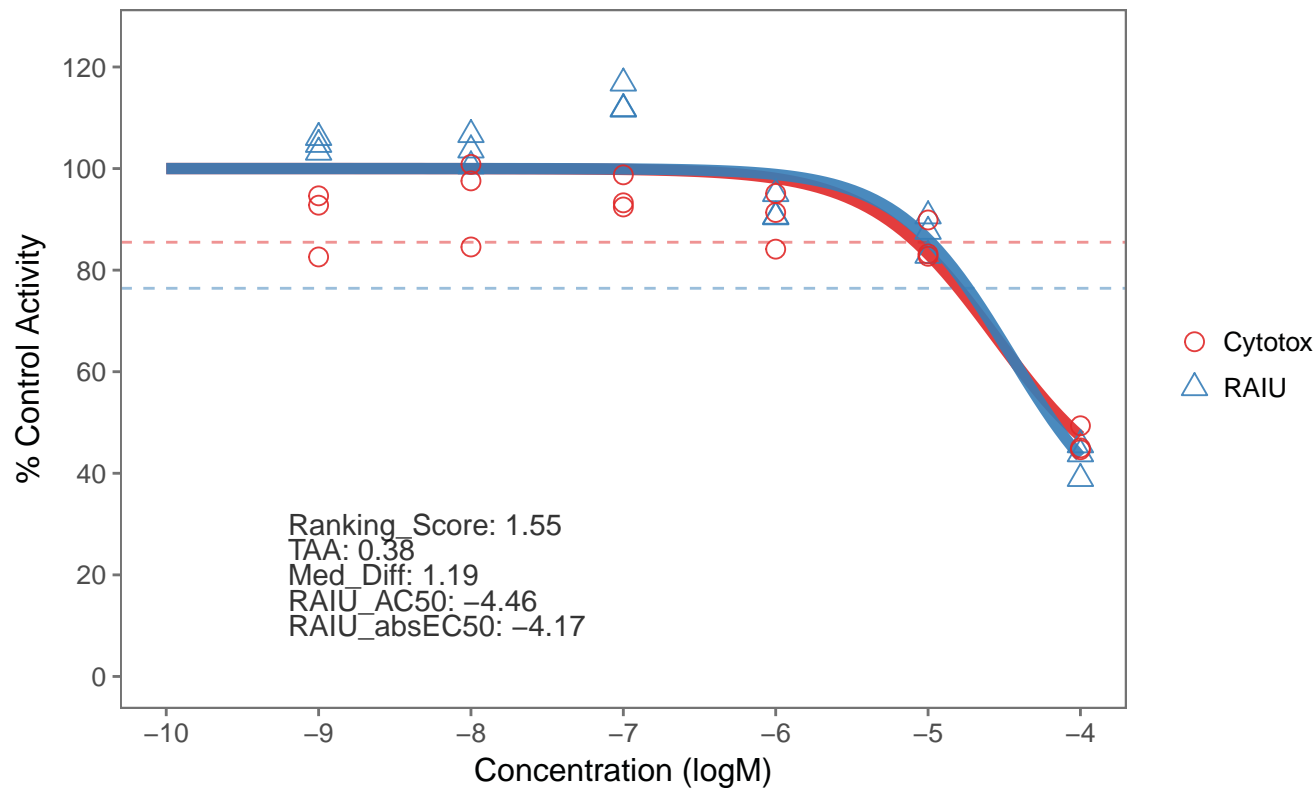

139. SPID: TP0001680D07

NAME: Azoxystrobin

CAS NO: 131860-33-8

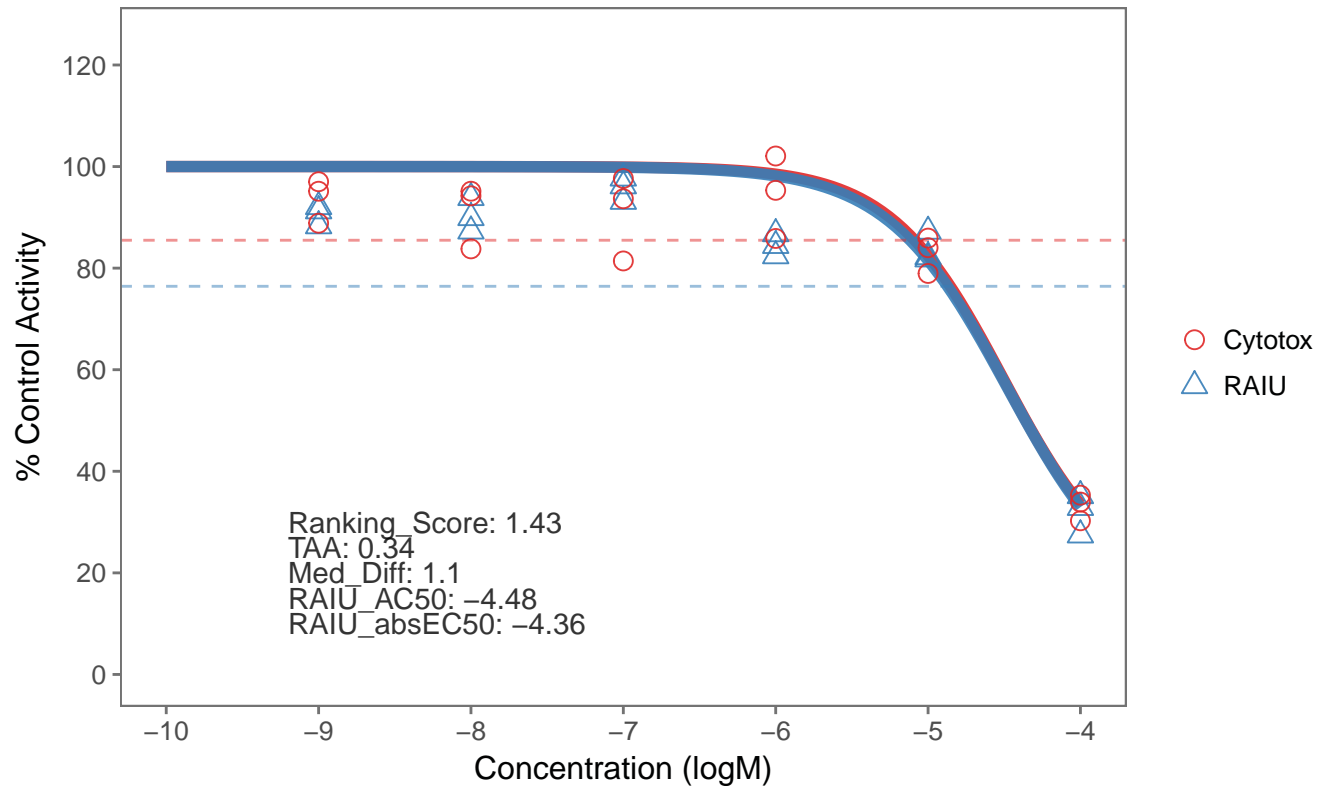

140. SPID: TP0001677C02

NAME: Oryzalin

CAS NO: 19044-88-3

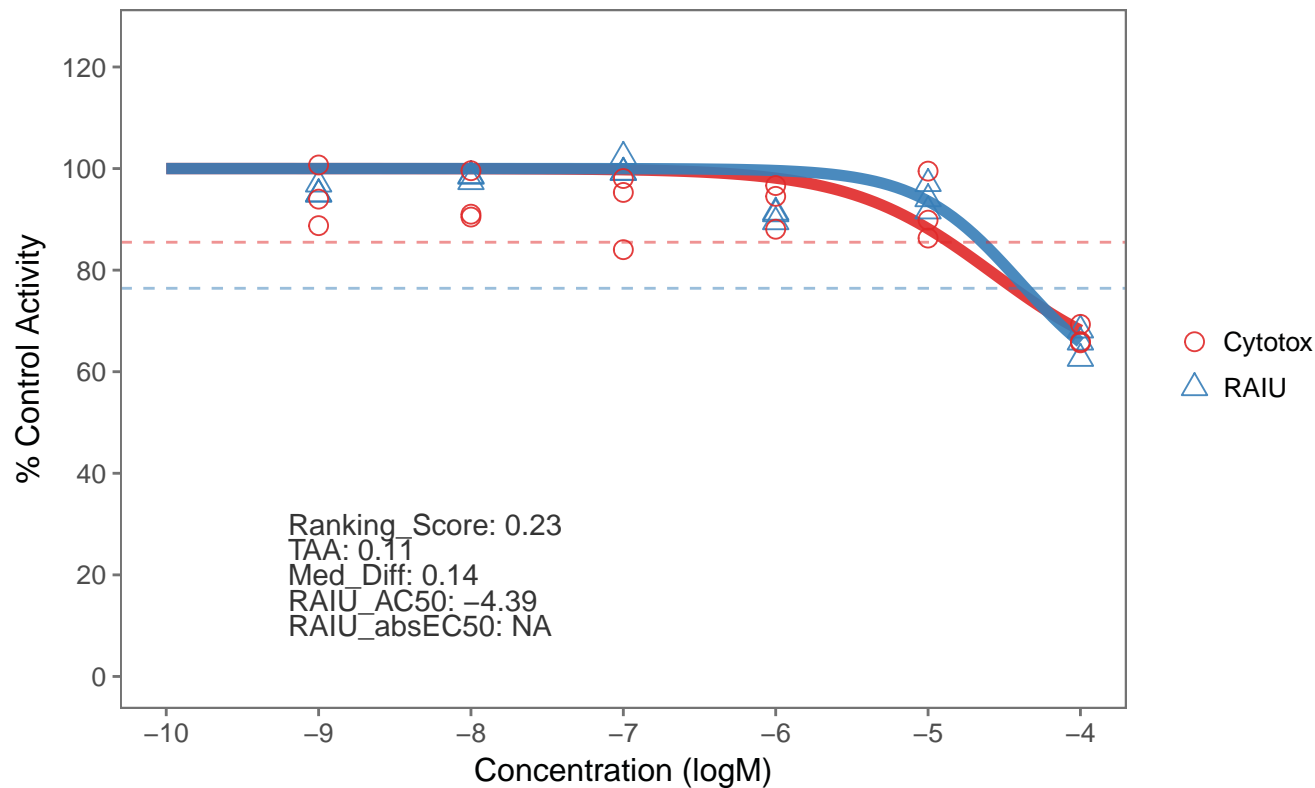

141. SPID: TP0001688F07

NAME: Troglitazone

CAS NO: 97322-87-7

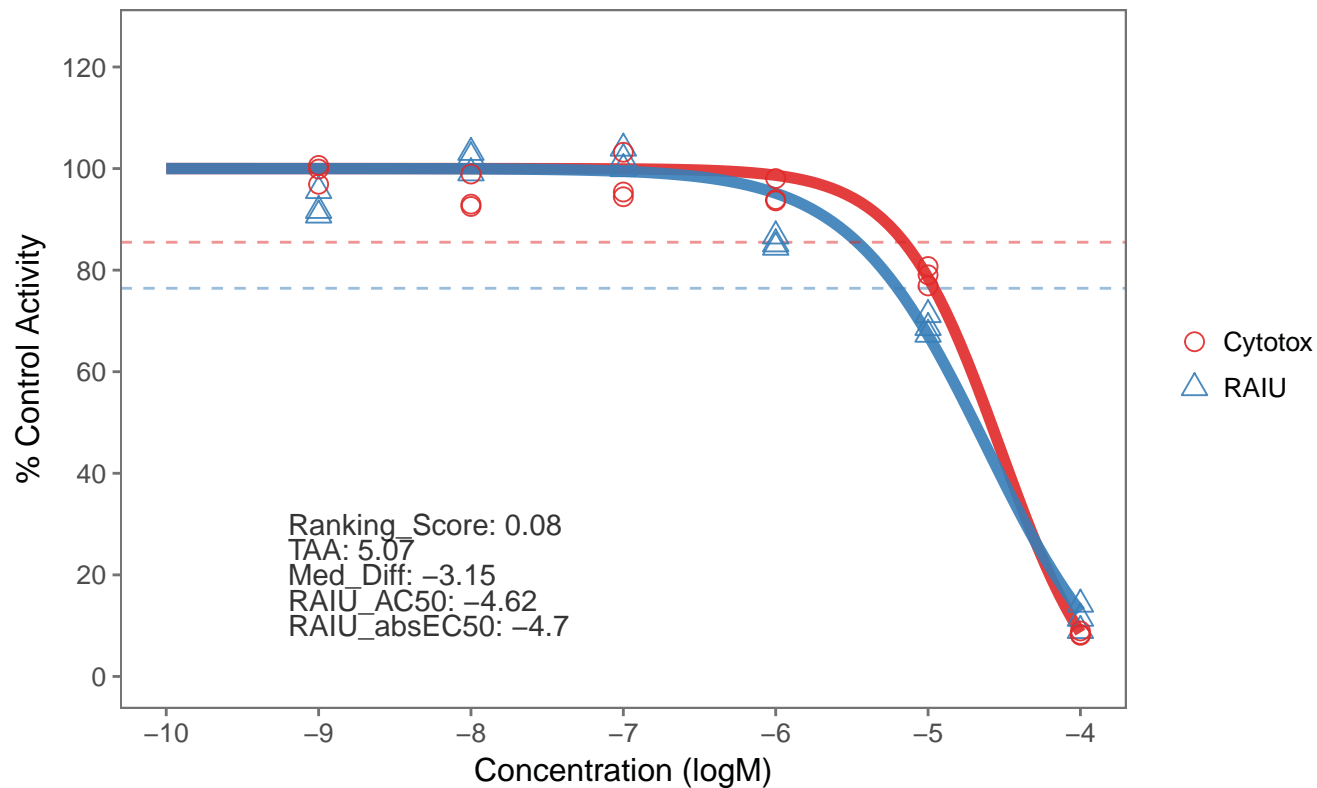

142. SPID: TP0001685D08

NAME: 4-Hexylresorcinol

CAS NO: 136-77-6

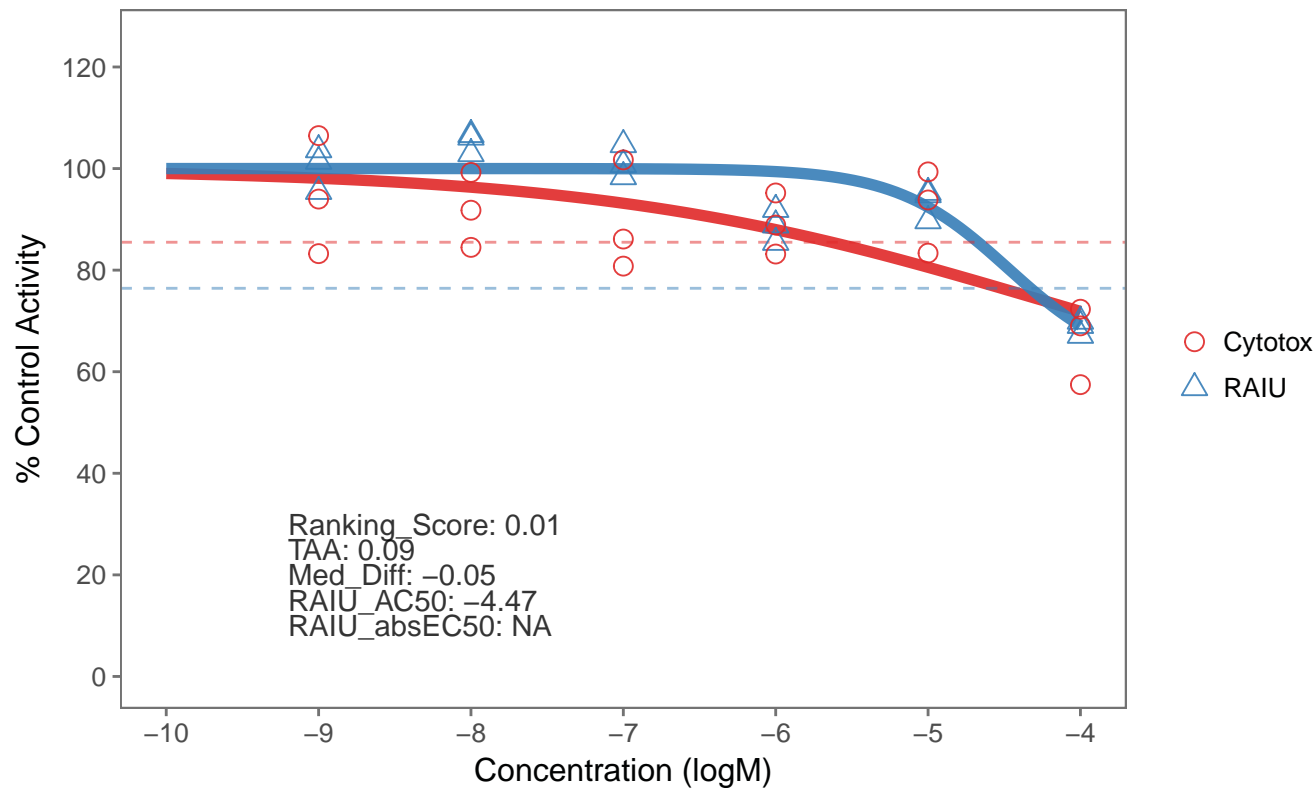

143. SPID: TP0001682E11  
NAME: PharmaGSID\_47330  
CAS NO: NOCAS\_47330

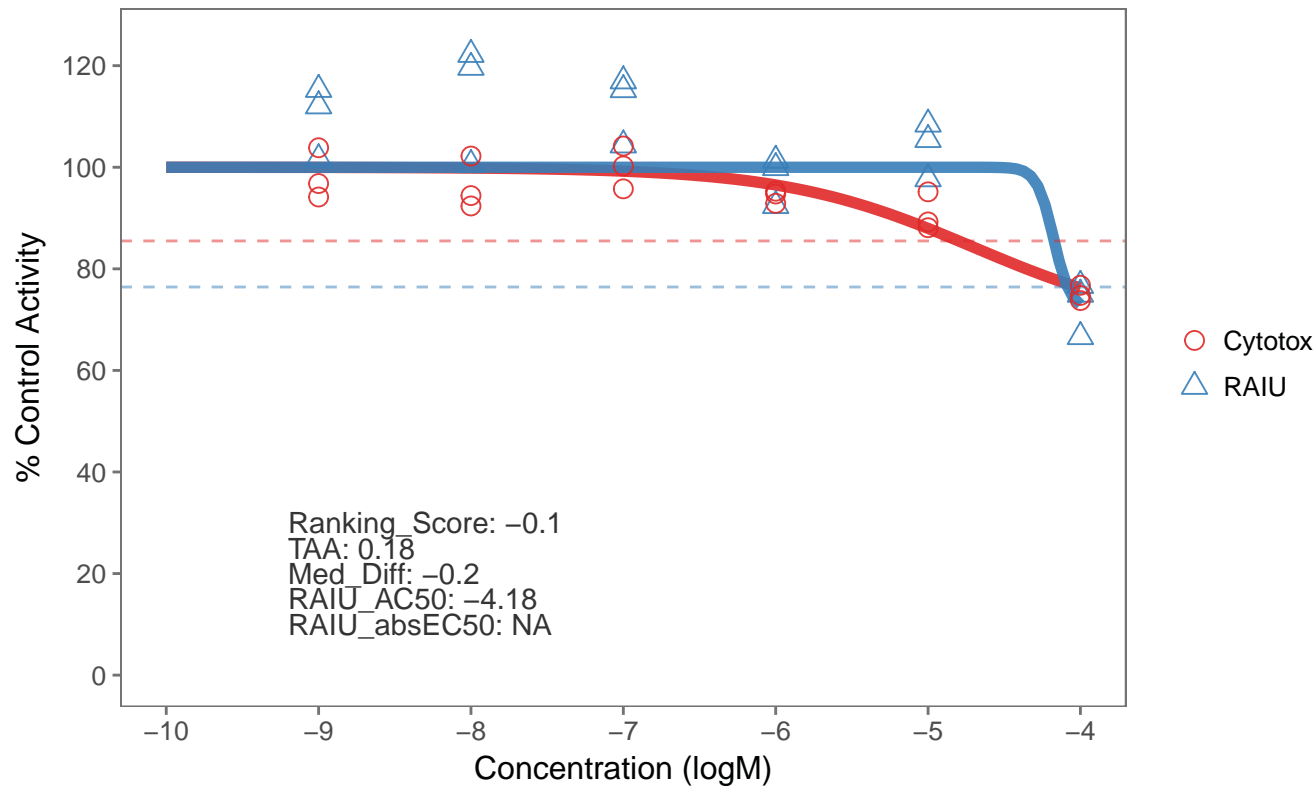

144. SPID: TP0001679D11  
NAME: Didecyldimethylammonium chloride  
CAS NO: 7173-51-5

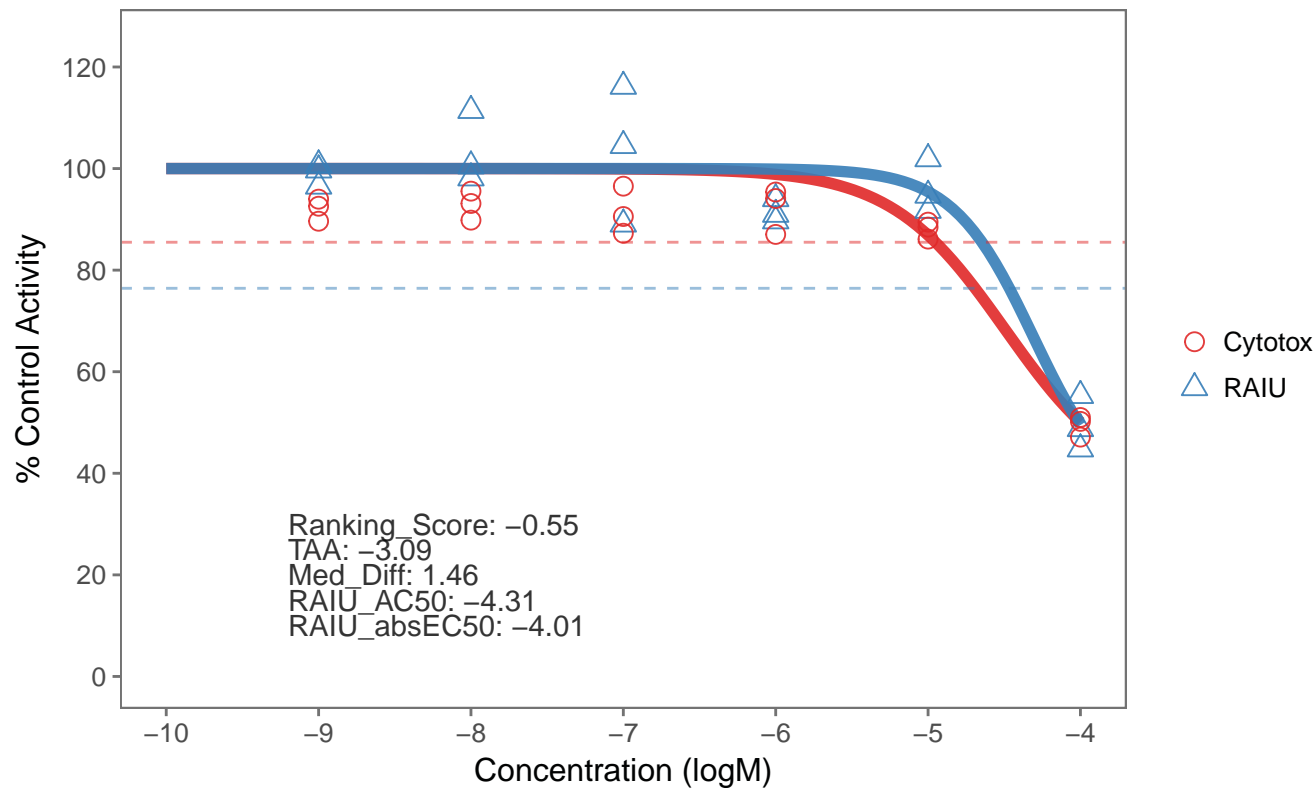



145. SPID: TP0001686C08  
NAME: Testosterone propionate  
CAS NO: 57-85-2

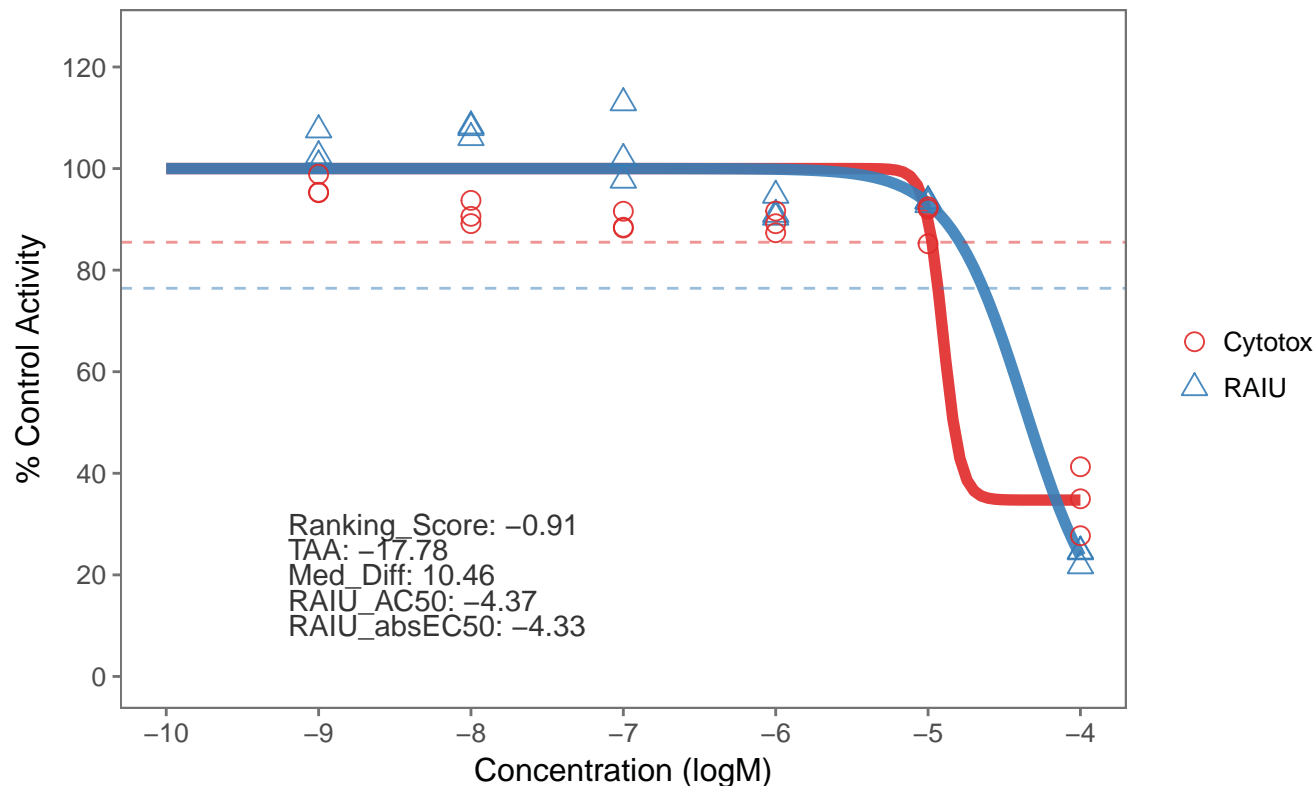

146. SPID: TP0001680D11

NAME: AVE5638

CAS NO: 725228-45-5

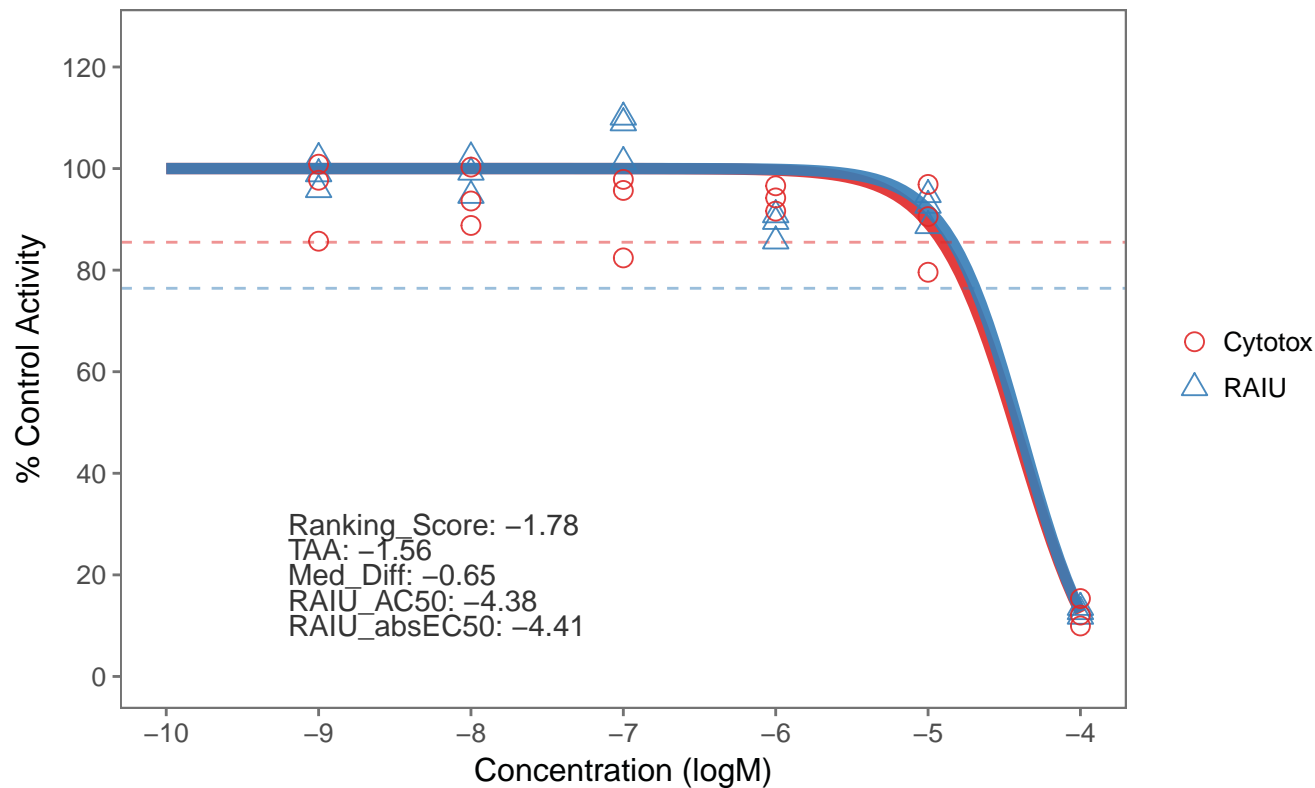

147. SPID: TP0001686C07

NAME: Fenofibrate

CAS NO: 49562-28-9

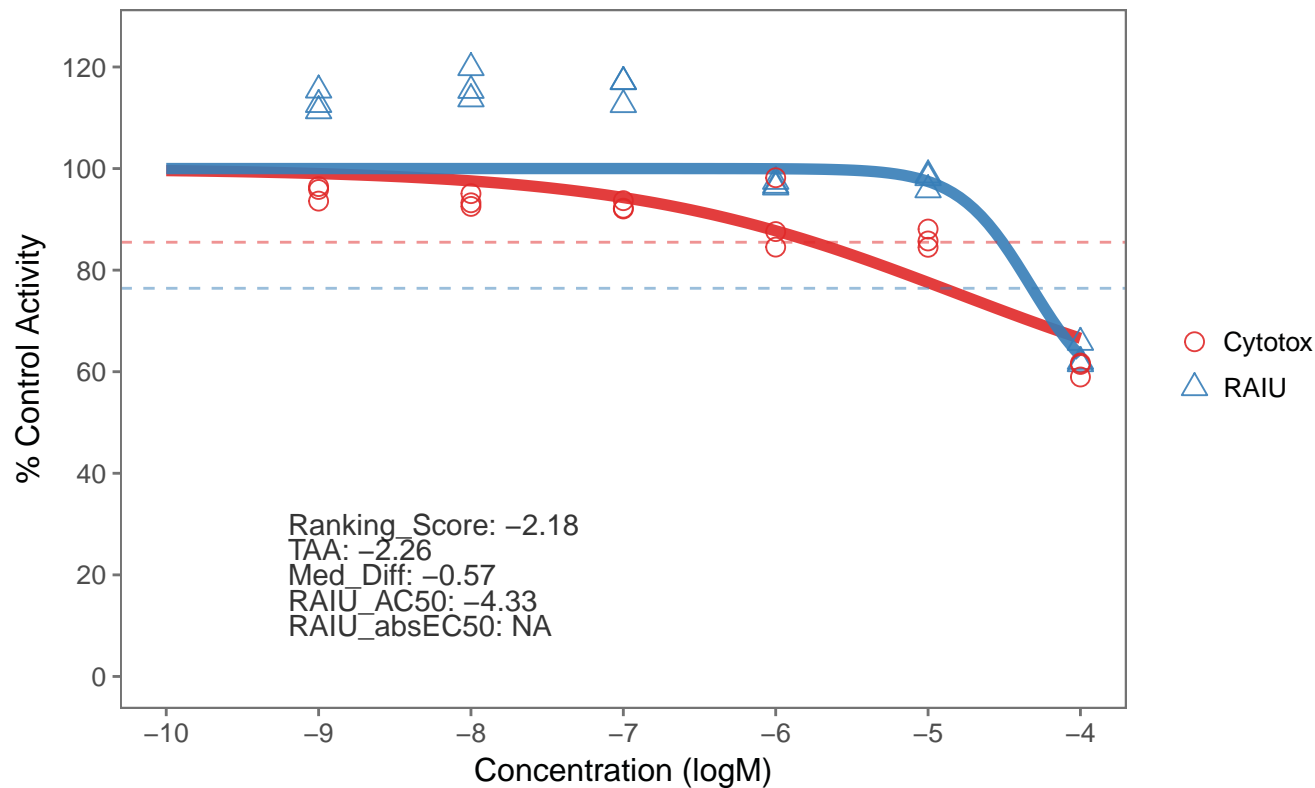

148. SPID: TP0001681G08  
NAME: SAR102779  
CAS NO: NOCAS\_47387

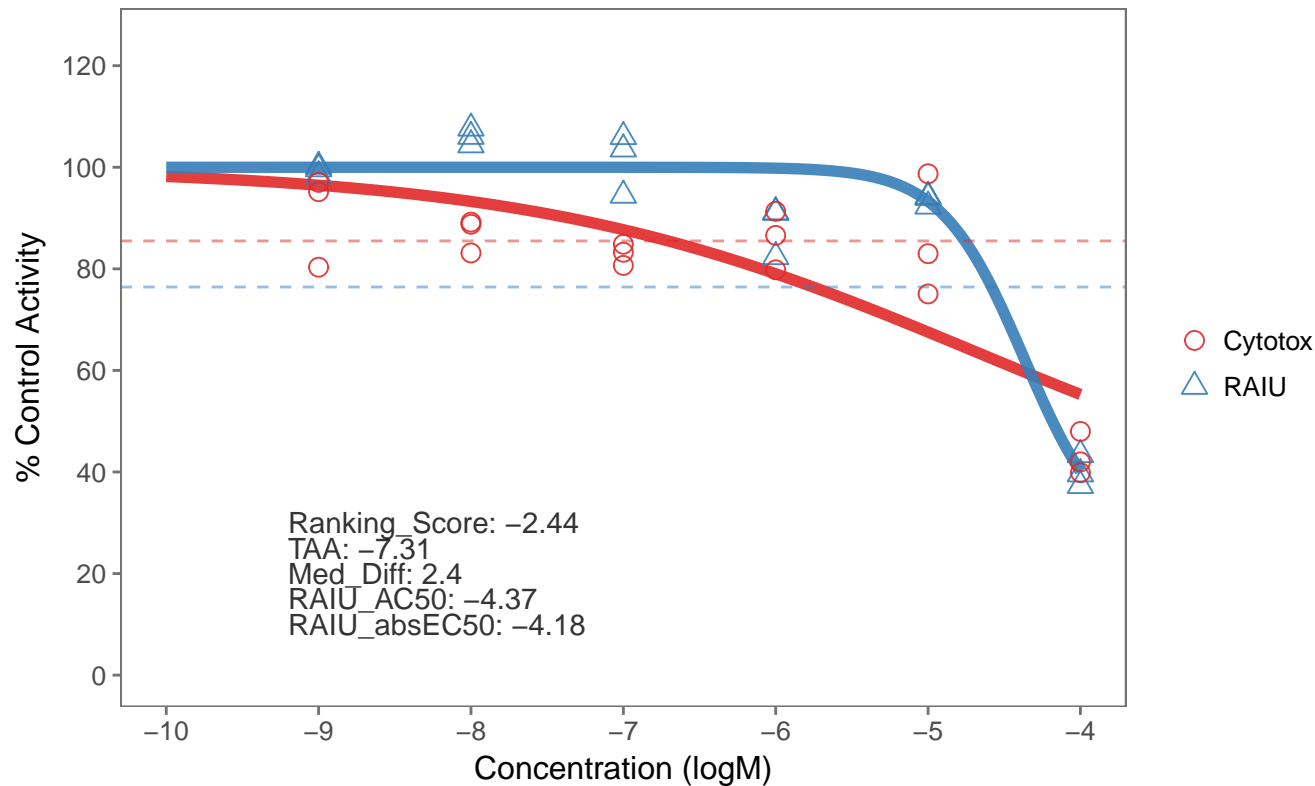

149. SPID: TP0001678D02

NAME: Allethrin

CAS NO: 584-79-2

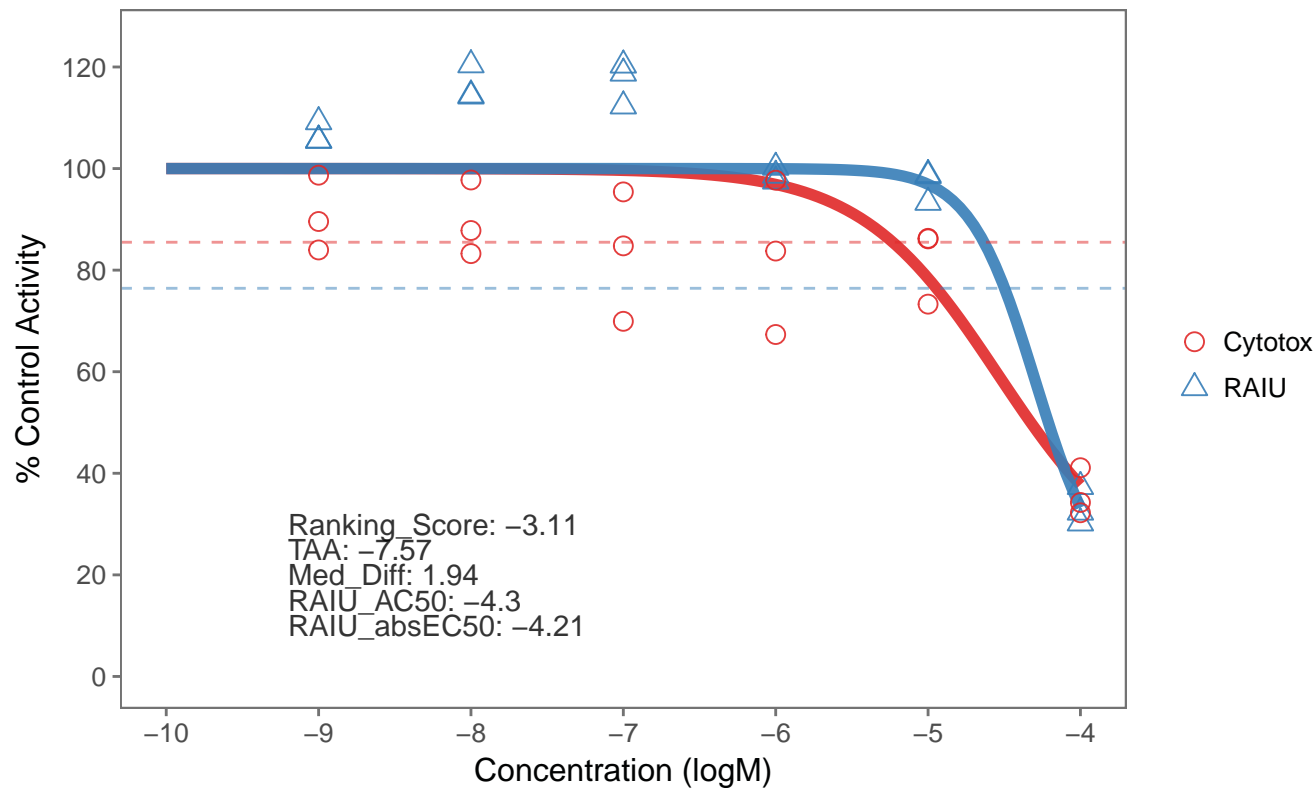

150. SPID: TP0001680F09  
NAME: Amiodarone hydrochloride  
CAS NO: 19774-82-4

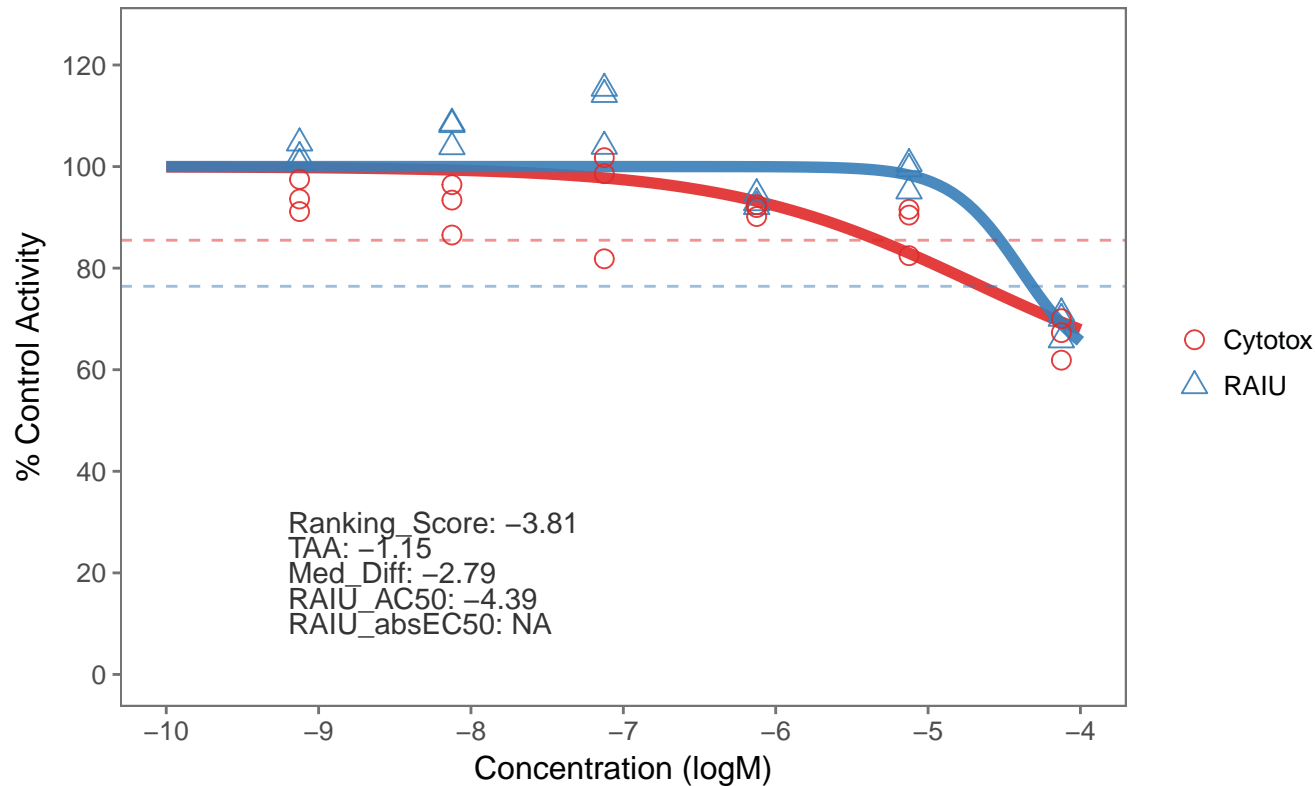

151. SPID: TP0001678C01  
NAME: 4-Nonylphenol, branched  
CAS NO: 84852-15-3

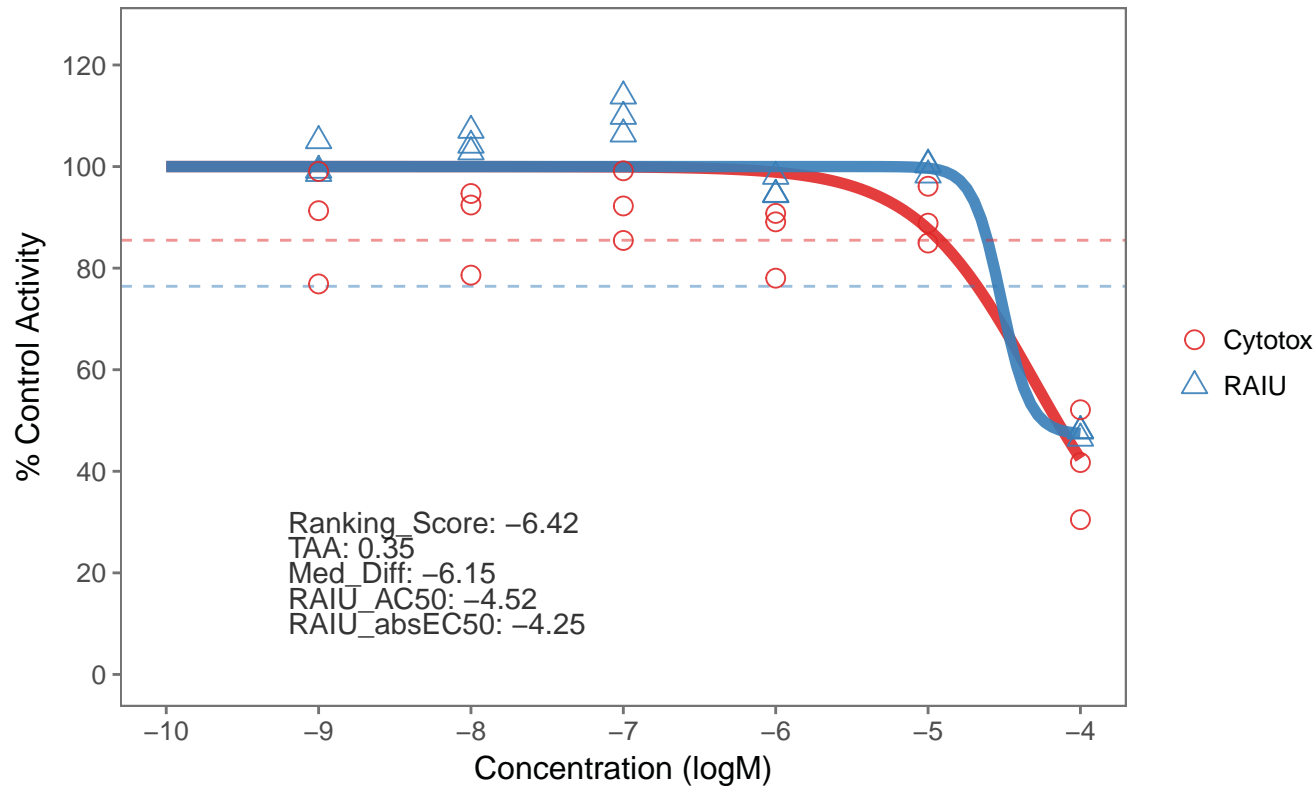

152. SPID: TP0001681E08

NAME: MK-968

CAS NO: NOCAS\_47334

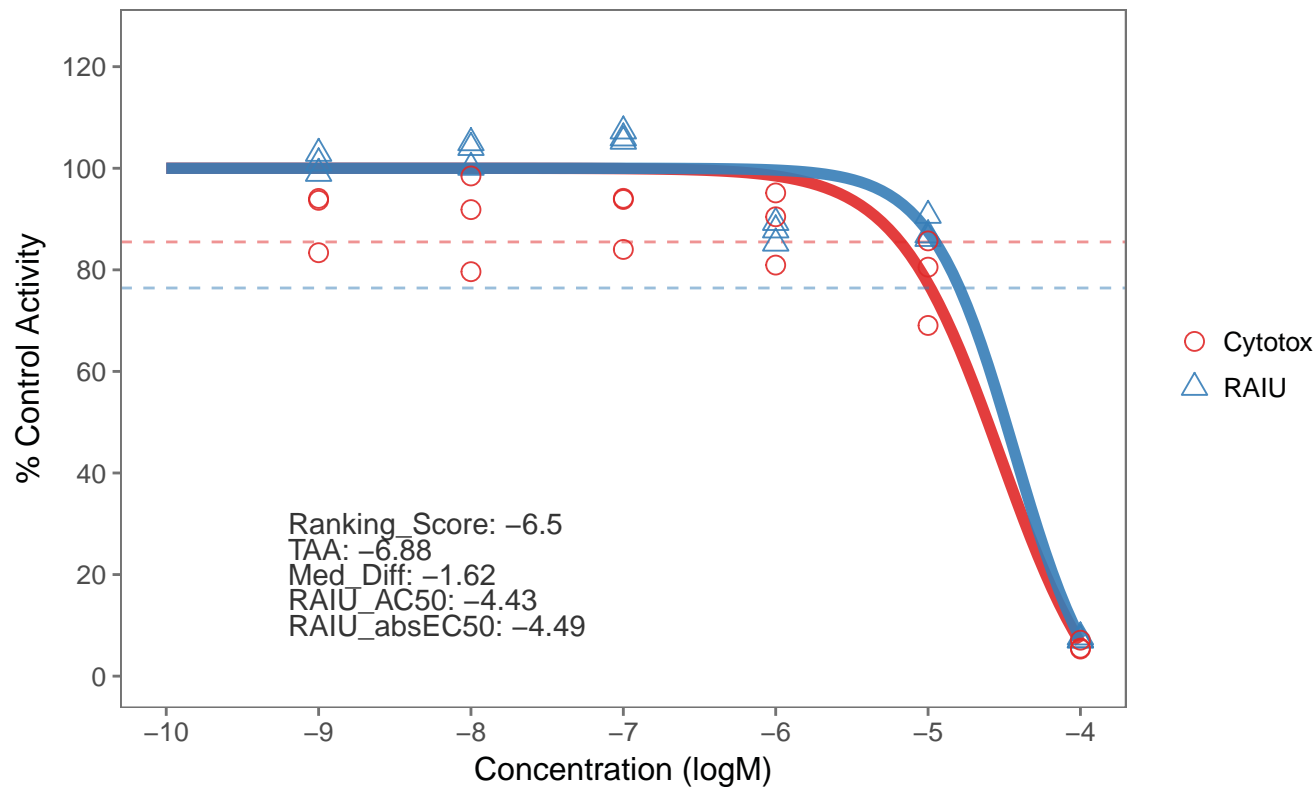



153. SPID: TP0001681D04

NAME: MK-274

CAS NO: NOCAS\_47328

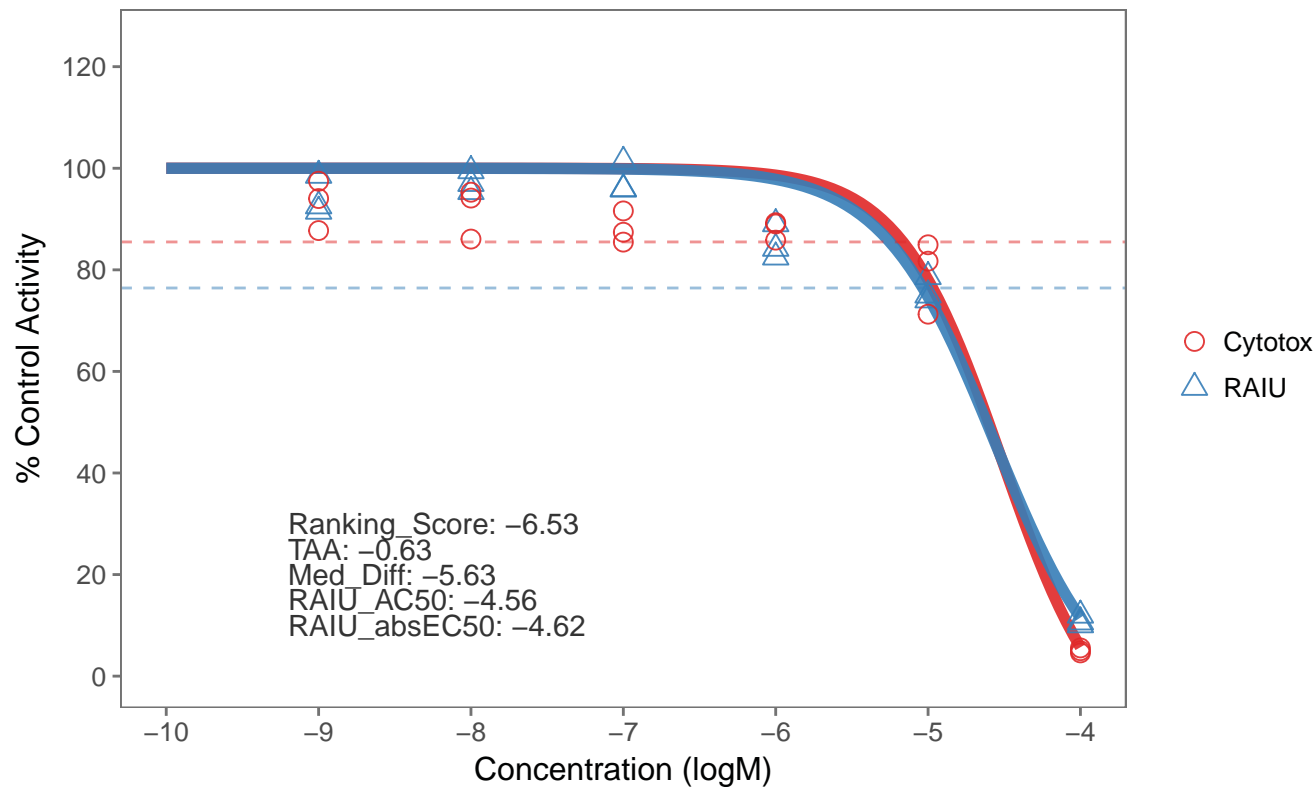

154. SPID: TP0001689C11  
NAME: PharmaGSID\_48172  
CAS NO: NOCAS\_48172

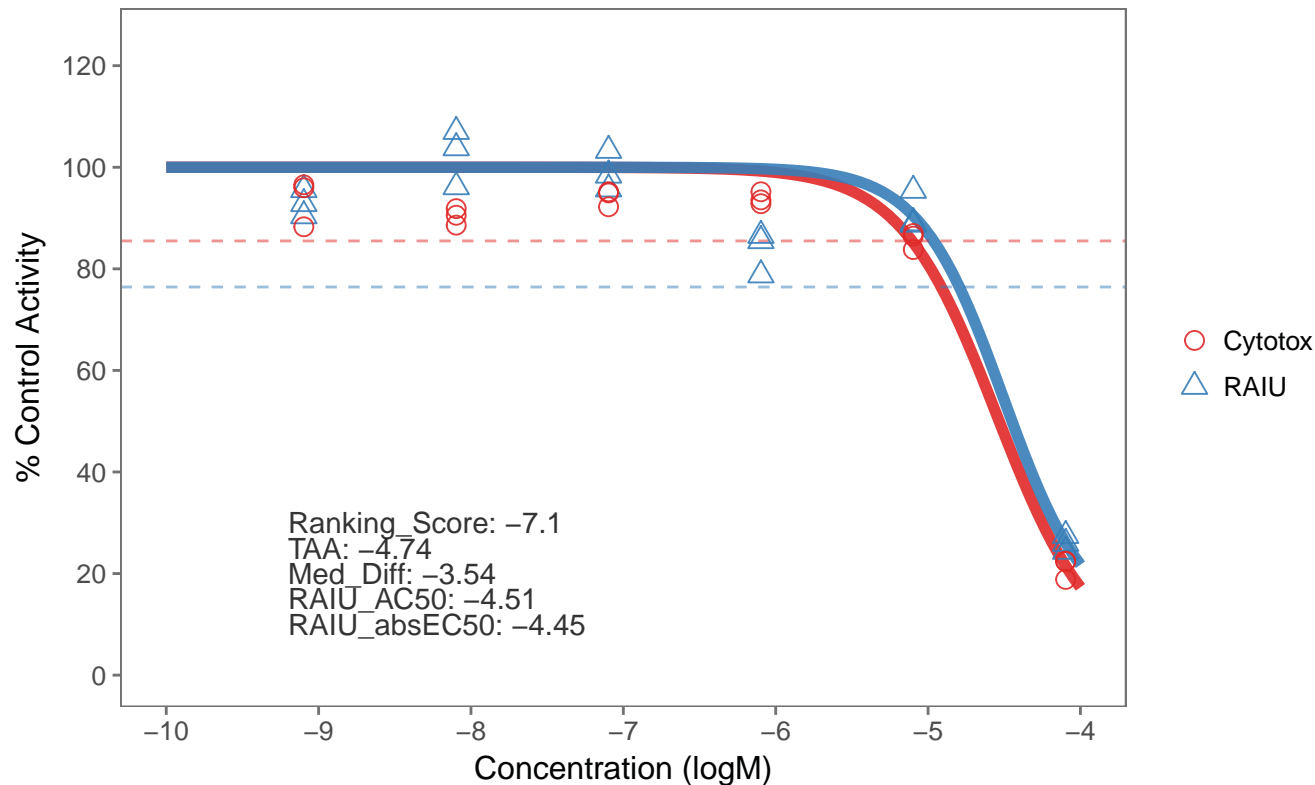

155. SPID: TP0001682F05

NAME: PD 0343701

CAS NO: 676116-04-4

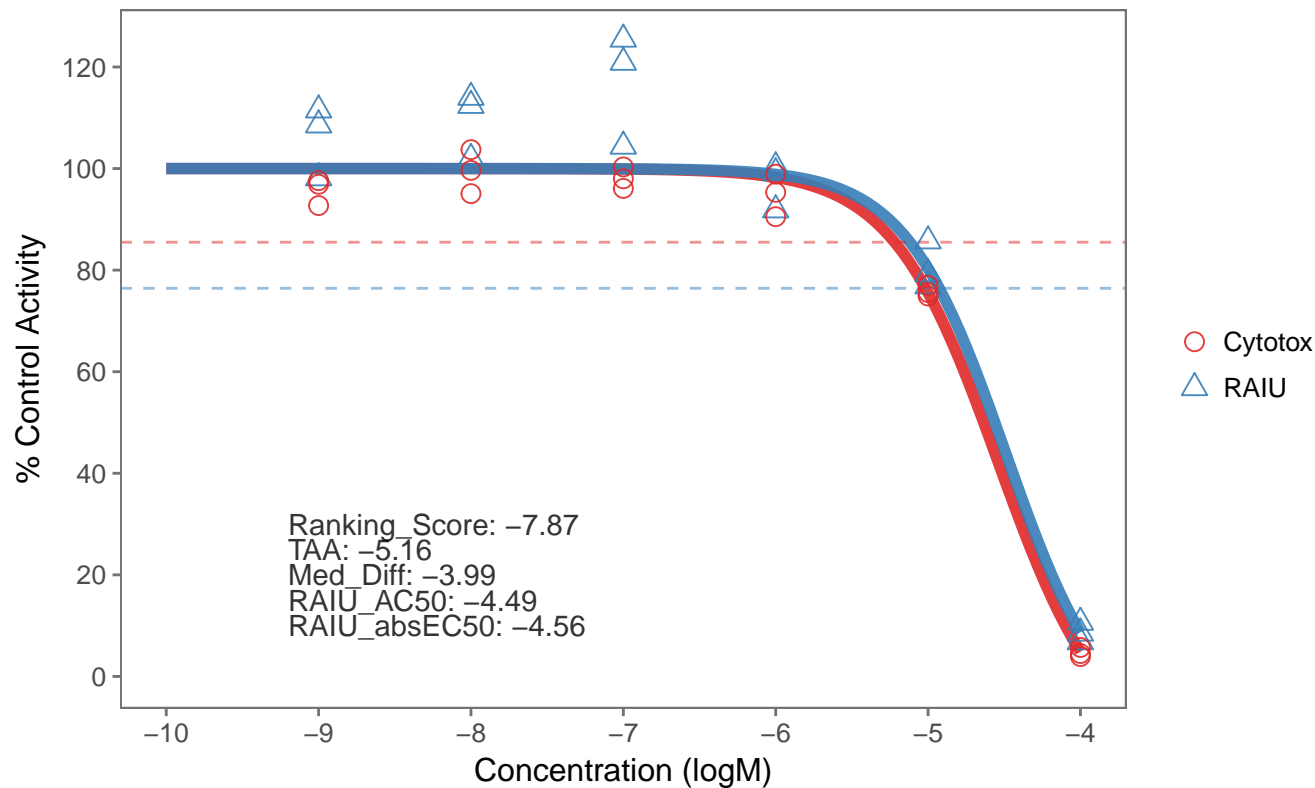

156. SPID: TP0001686G02

NAME: Gentian Violet

CAS NO: 548-62-9

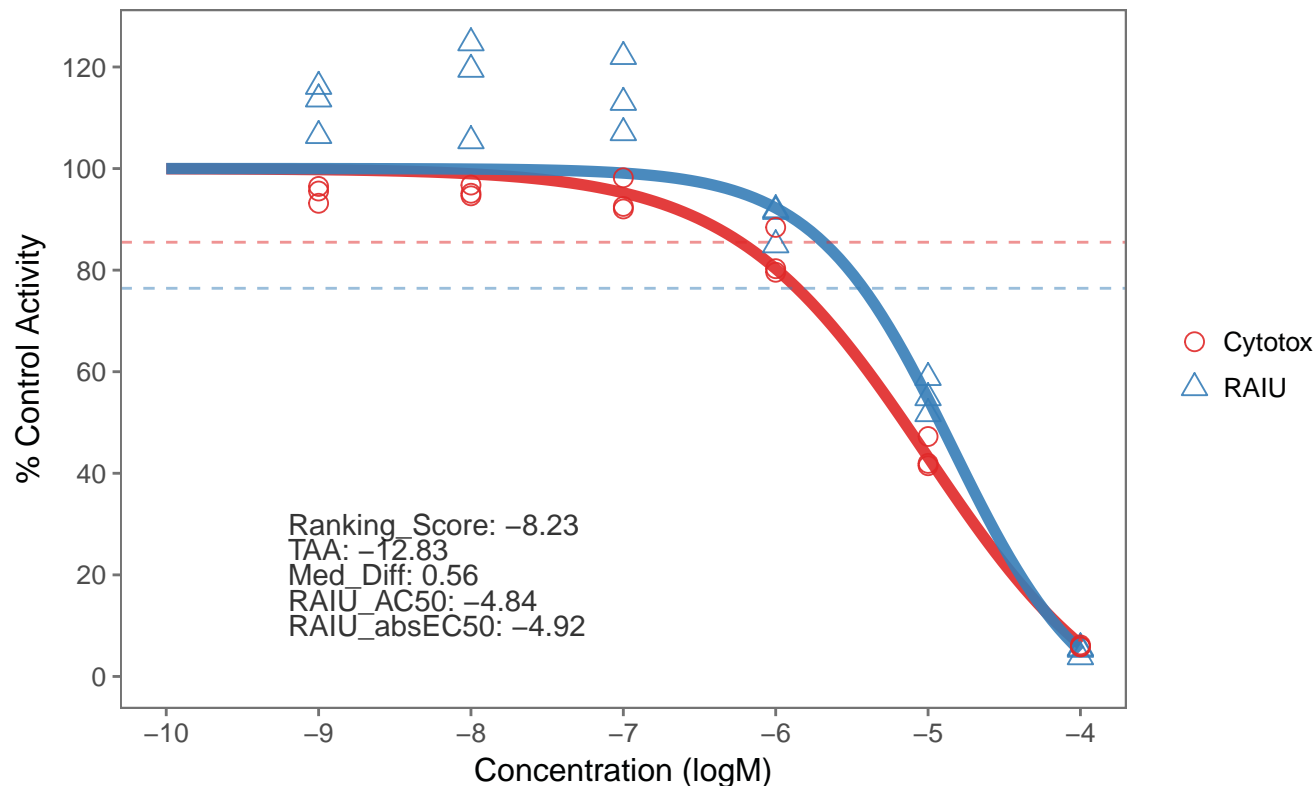

157. SPID: TP0001678F04  
NAME: PharmaGSID\_48519  
CAS NO: 686756-87-6

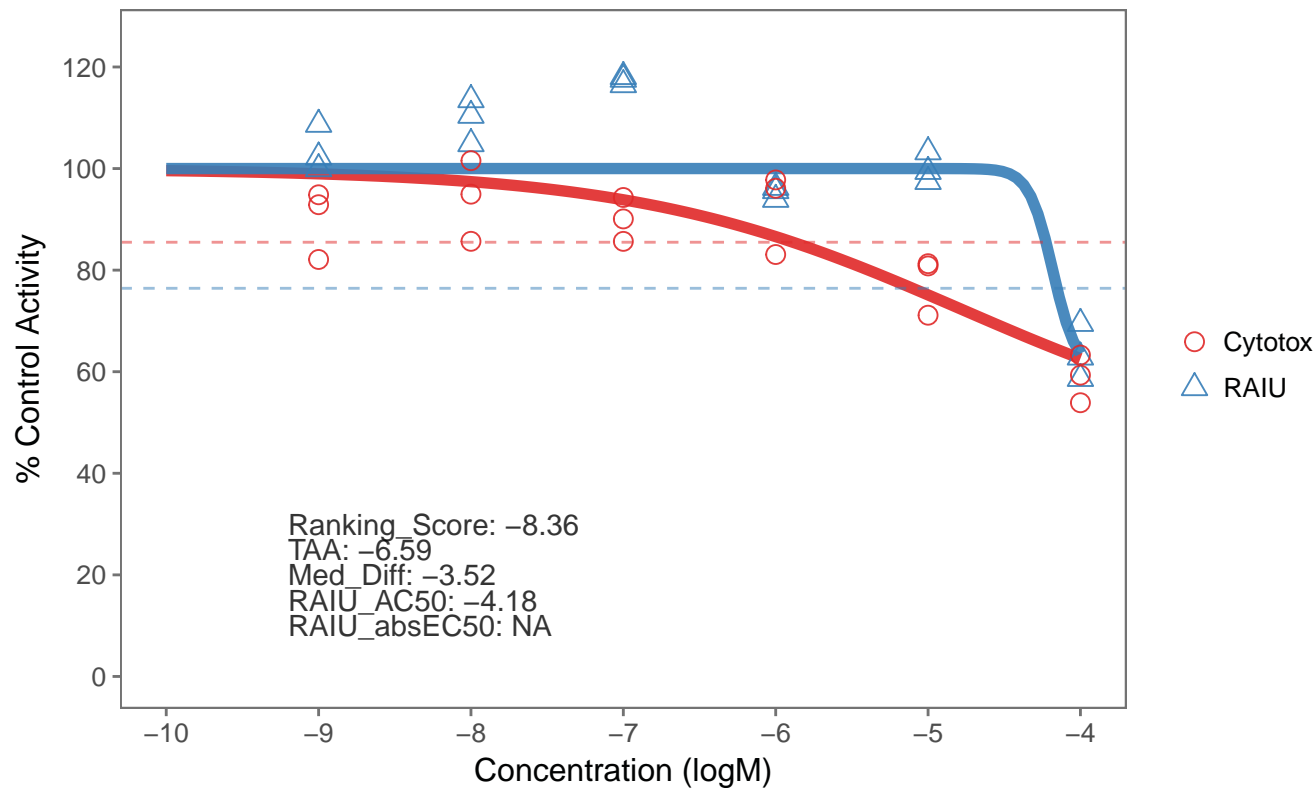

158. SPID: TP0001678G09  
NAME: SB243213A  
CAS NO: 200940-23-4

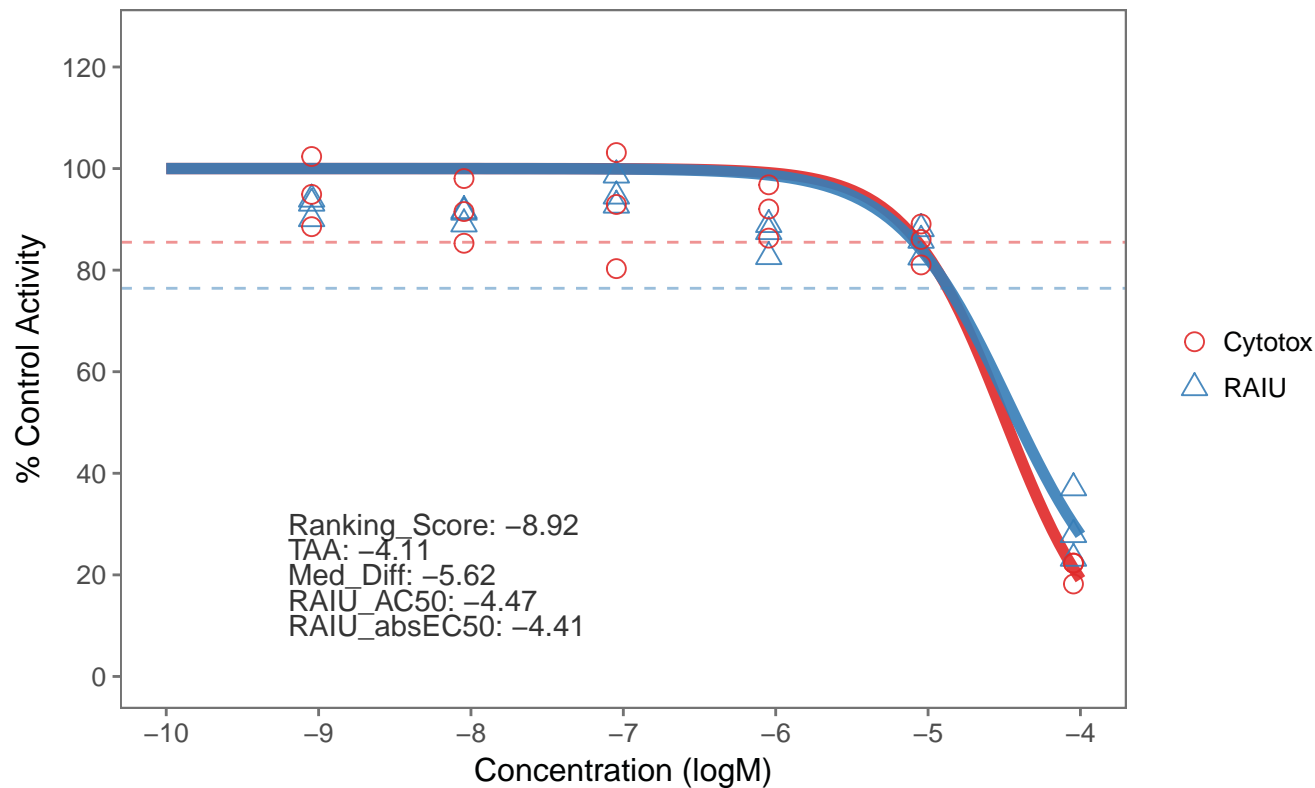

159. SPID: TP0001688C08

NAME: Progesterone

CAS NO: 57-83-0

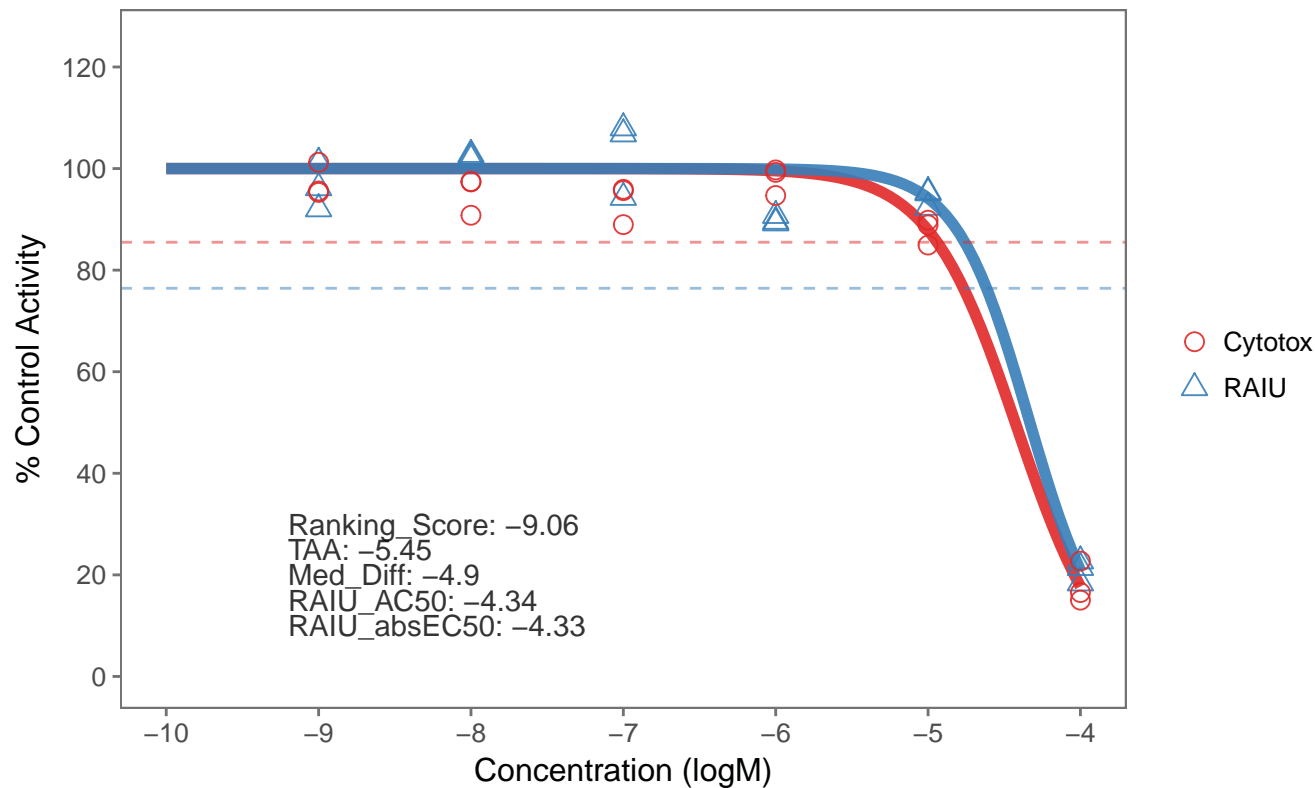

160. SPID: TP0001679G09  
NAME: 4-Cumylphenol  
CAS NO: 599-64-4

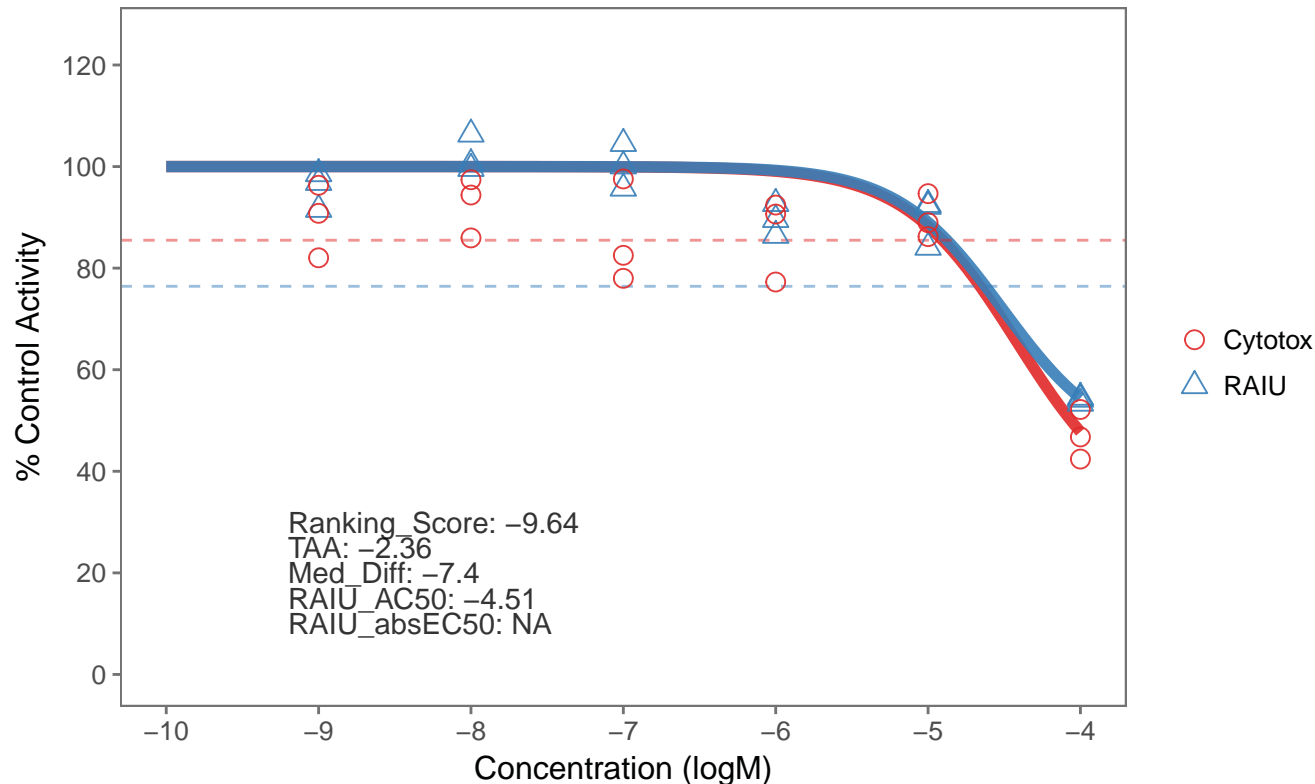



161. SPID: TP0001679D01

NAME: HMR1426

CAS NO: 262376-75-0

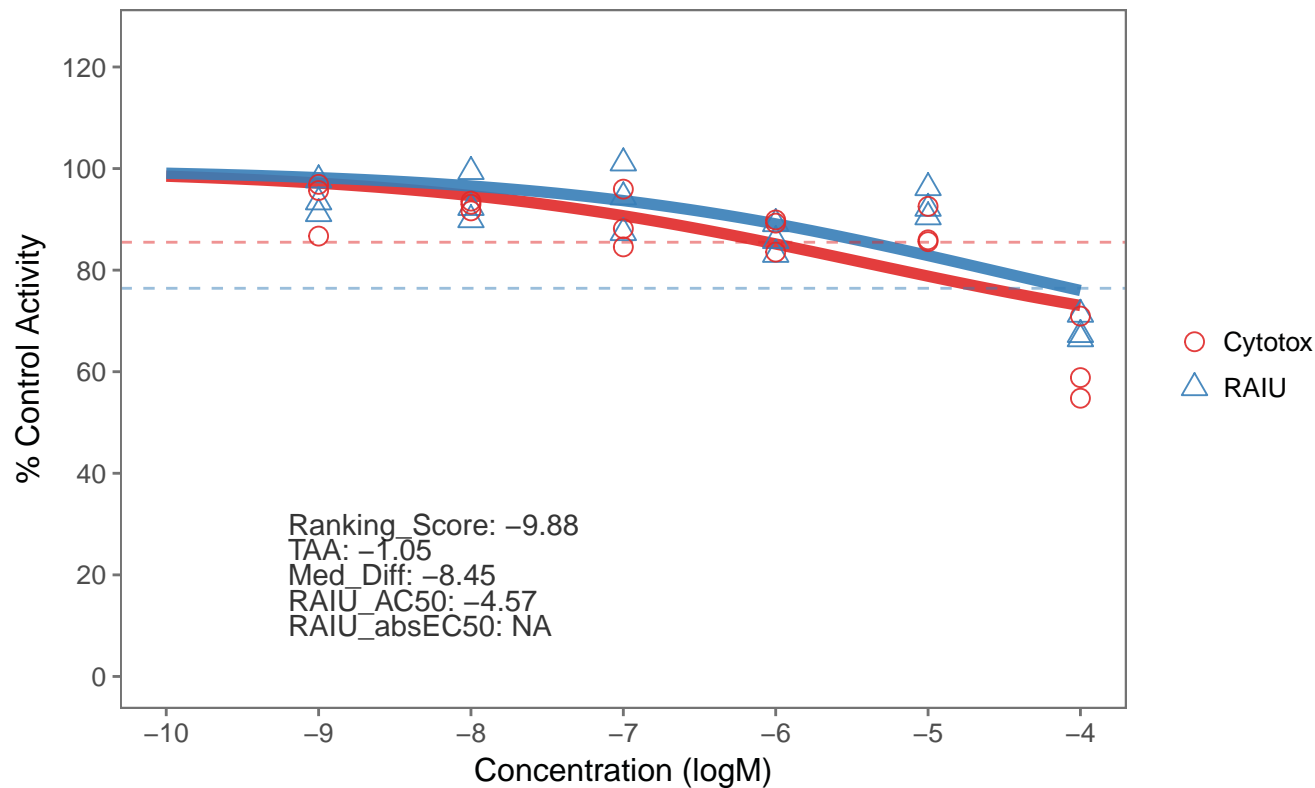

162. SPID: TP0001680F03  
NAME: Diisobutyl phthalate  
CAS NO: 84-69-5

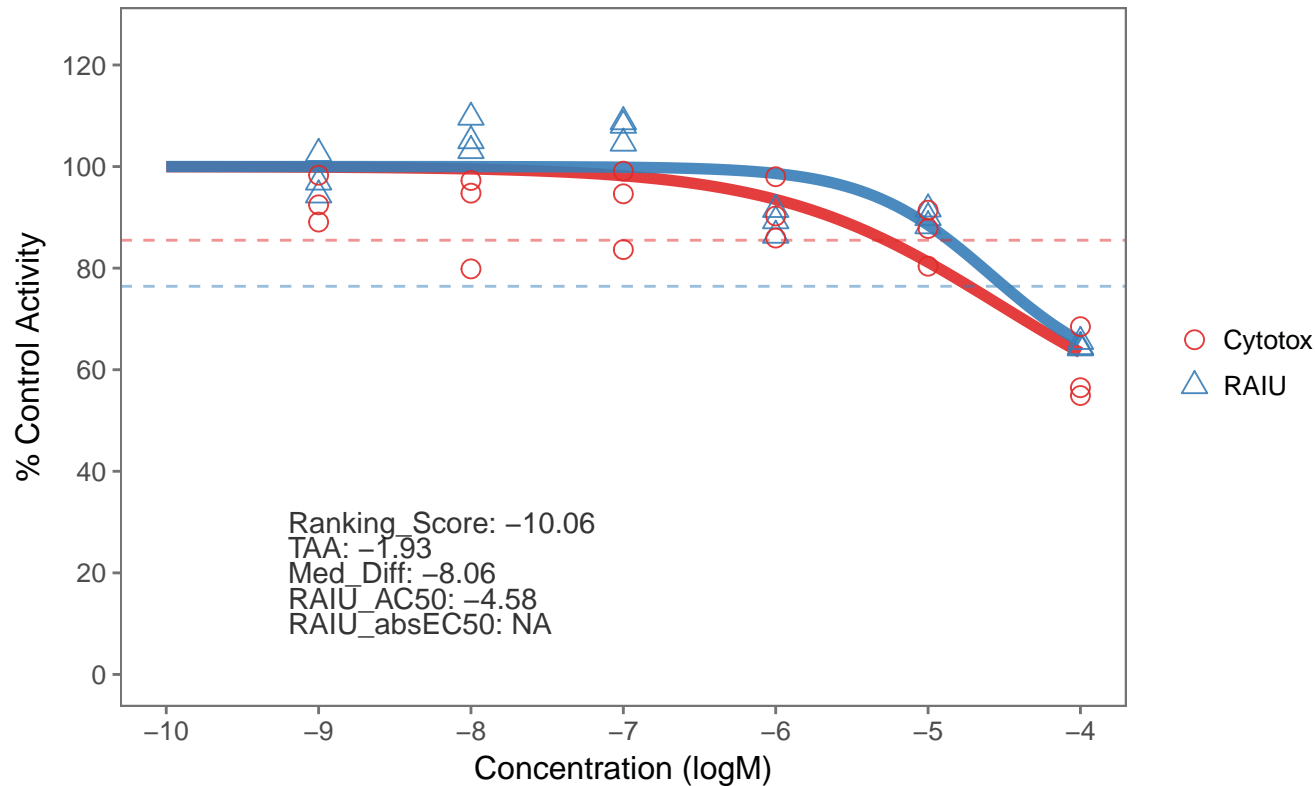

163. SPID: TP0001687B07

NAME: Quercetin

CAS NO: 117-39-5

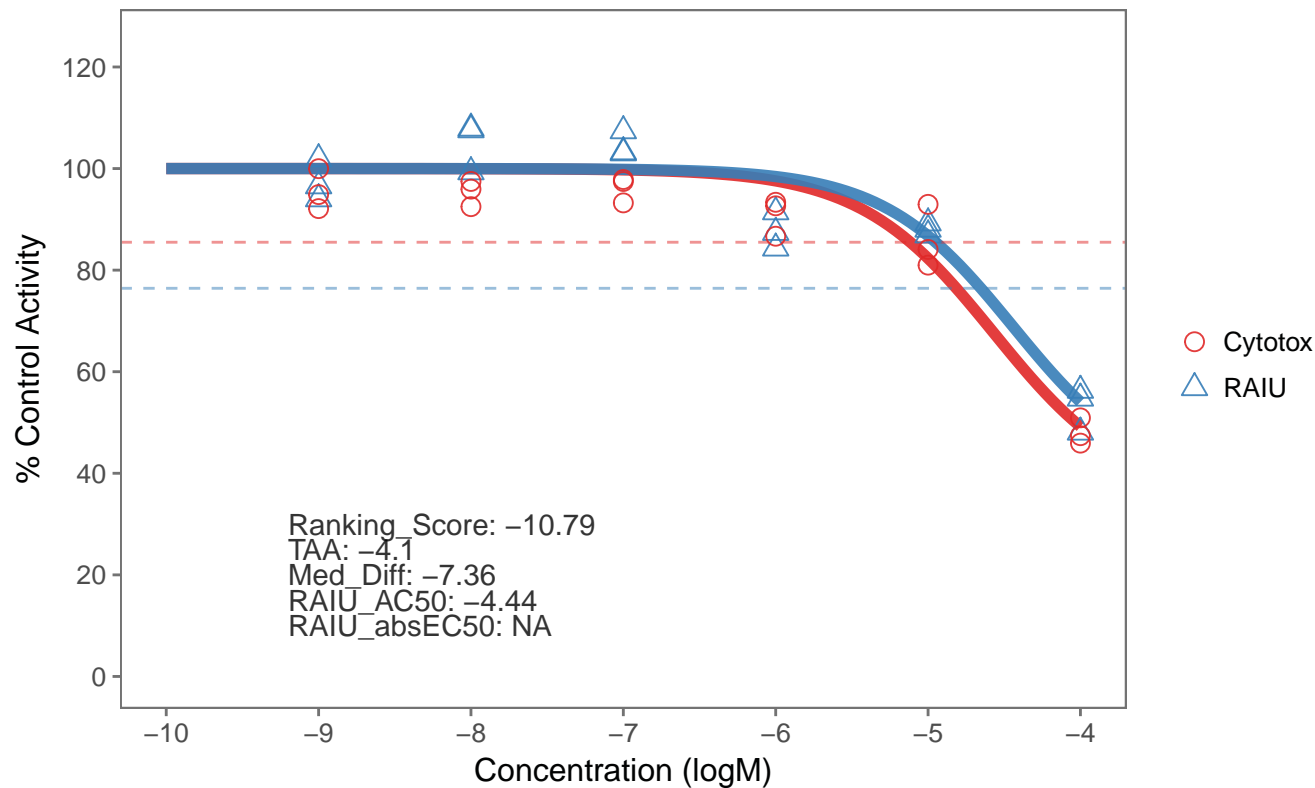

164. SPID: TP0001682C04  
NAME: 4-(1,1,3,3-Tetramethylbutyl)phenol  
CAS NO: 140-66-9

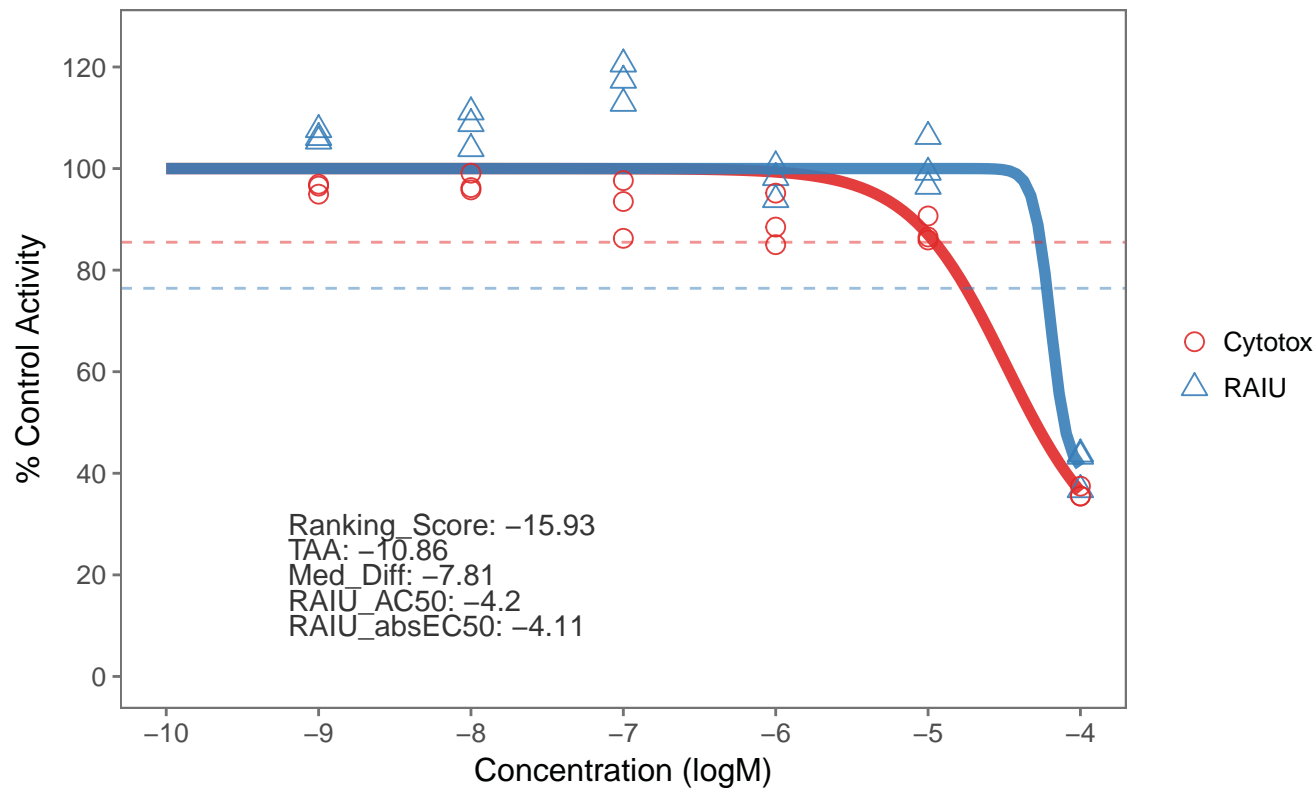

165. SPID: TP0001687E09

NAME: Mercuric chloride

CAS NO: 7487-94-7

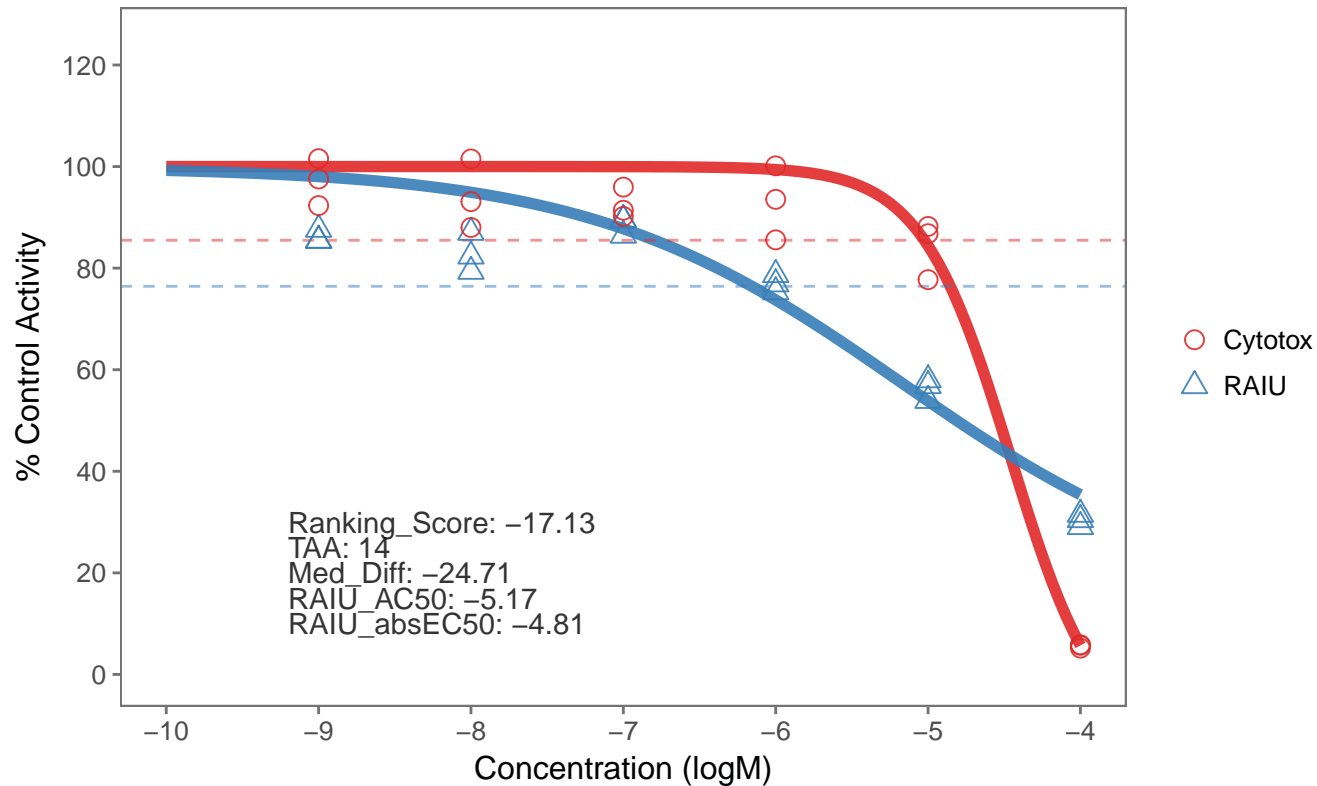

166. SPID: TP0001682C02

NAME: SB236057A

CAS NO: 180084-01-9

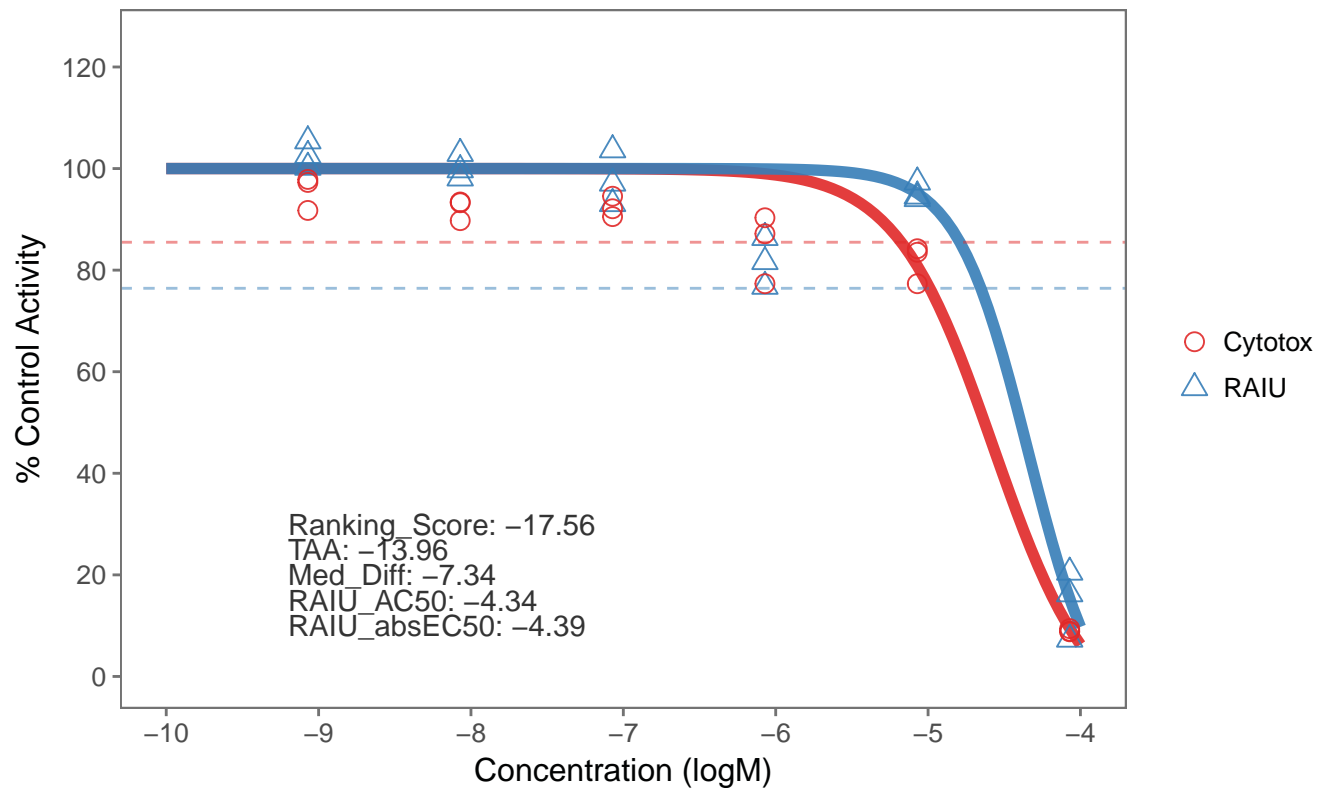

167. SPID: TP0001681A01  
NAME: Clomiphene citrate (1:1)  
CAS NO: 50-41-9

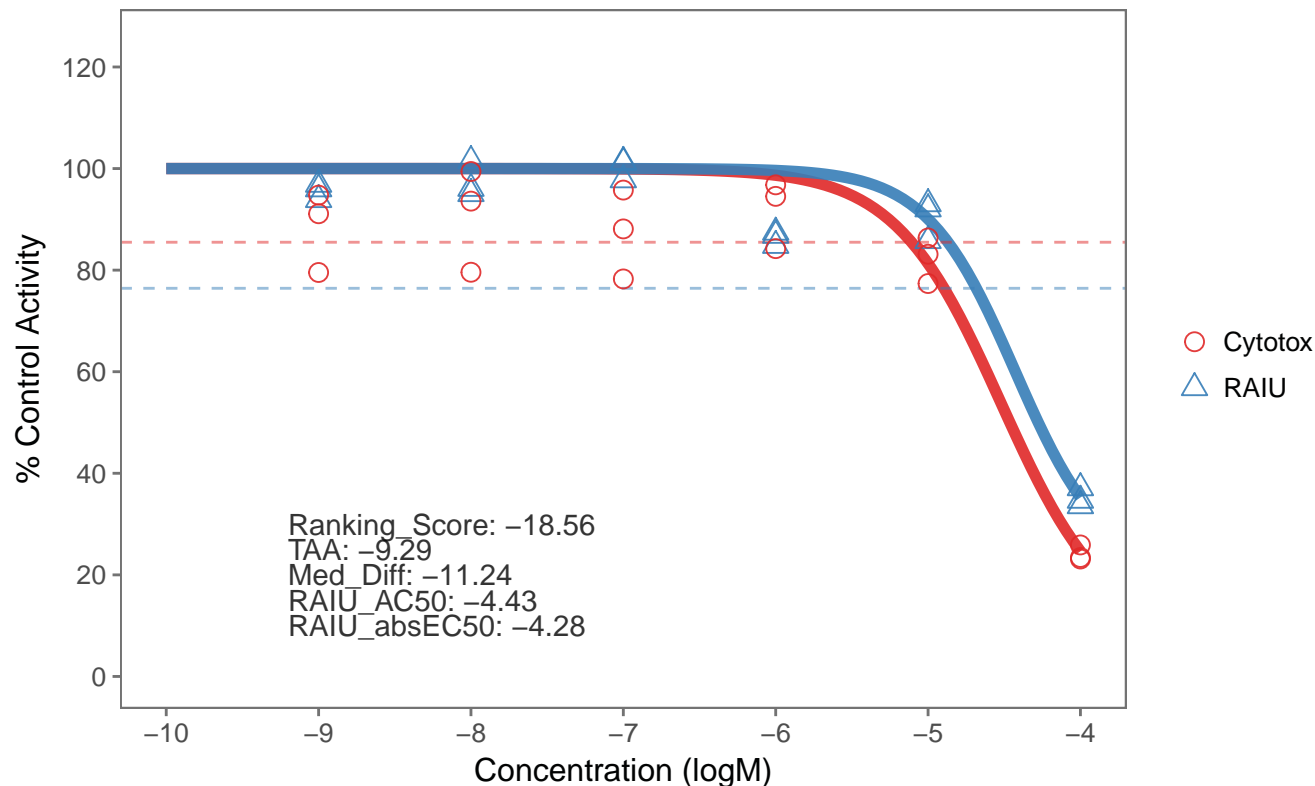

168. SPID: TP0001682E10  
NAME: Darbufelone mesylate  
CAS NO: 139340-56-0

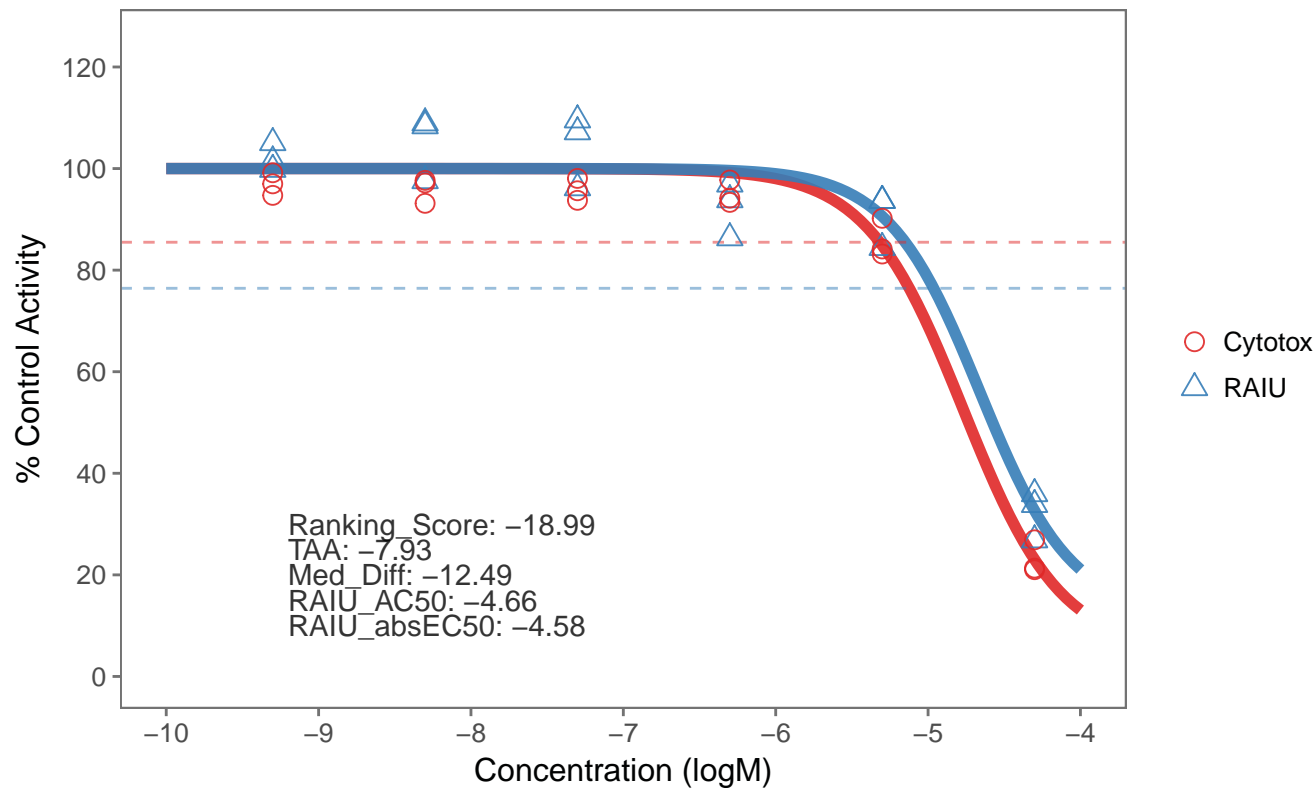



169. SPID: TP0001681B04  
NAME: 7,12-Dimethylbenz(a)anthracene  
CAS NO: 57-97-6

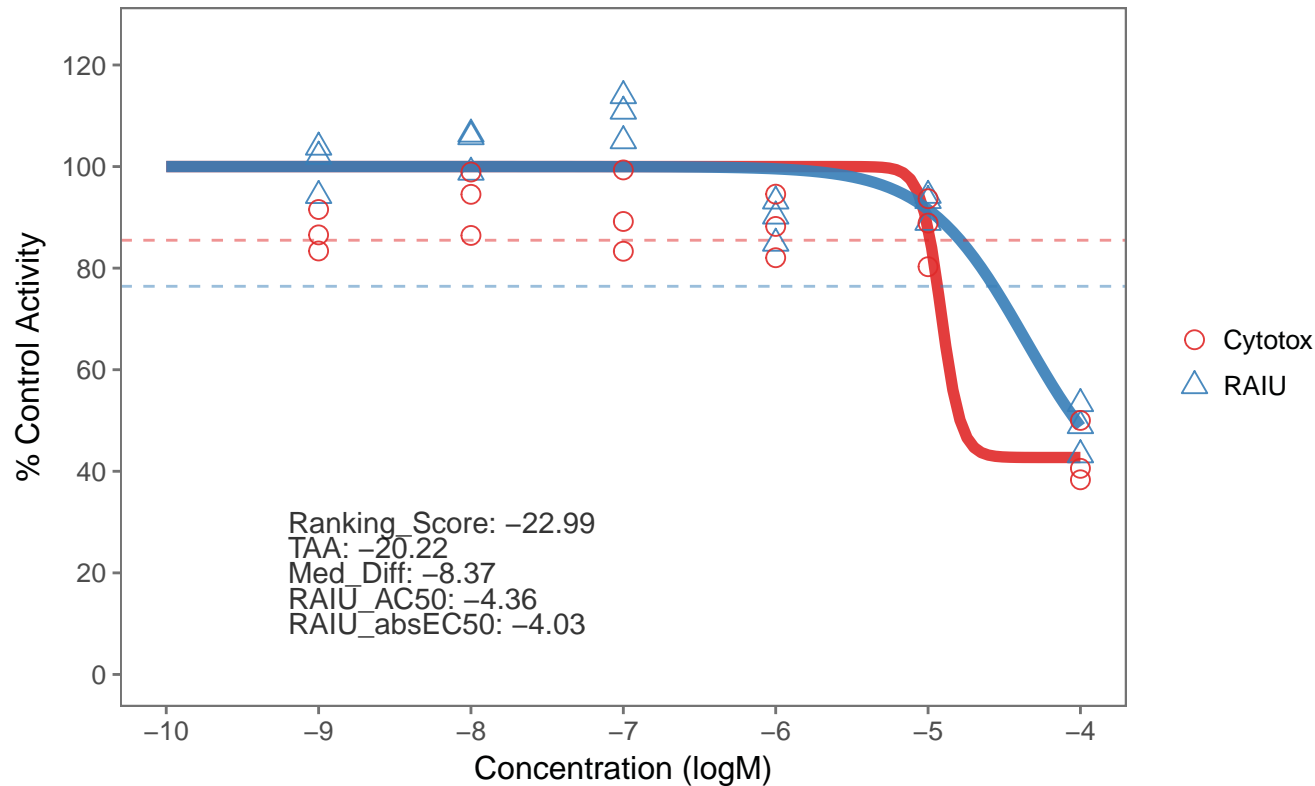

170. SPID: TP0001679C01  
NAME: Diethylstilbestrol  
CAS NO: 56-53-1

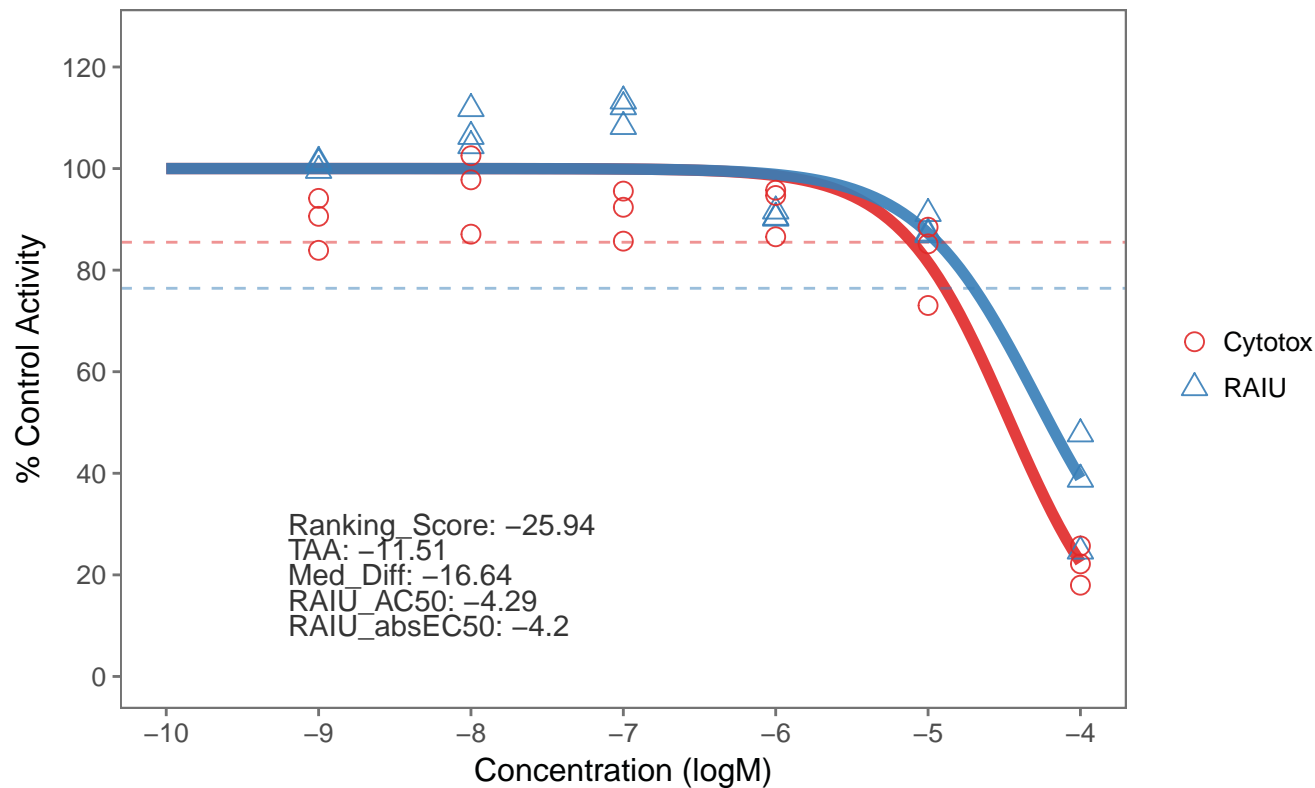

171. SPID: TP0001678F03  
NAME: AVE6324  
CAS NO: NOCAS\_47377

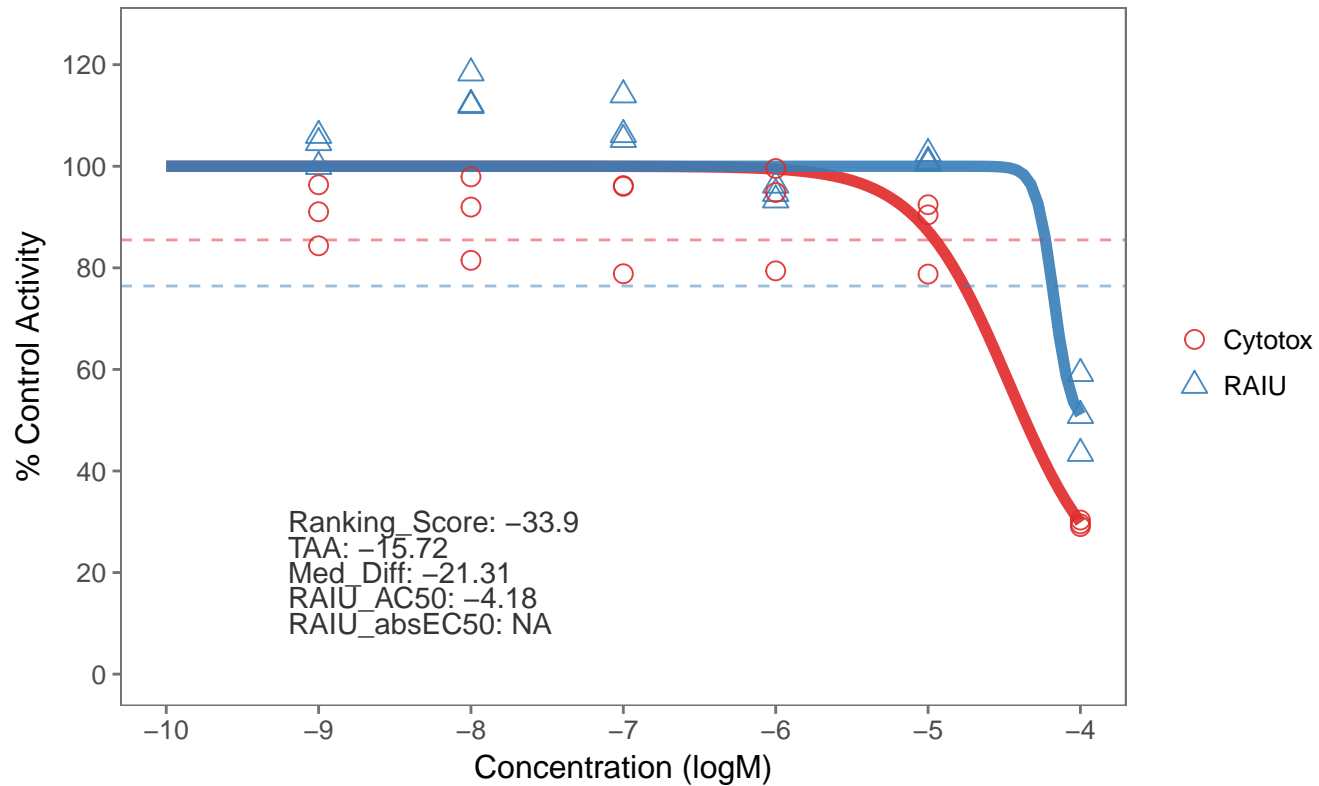



173. SPID: TP0001677A01

NAME: Methimazole

CAS NO: 60-56-0

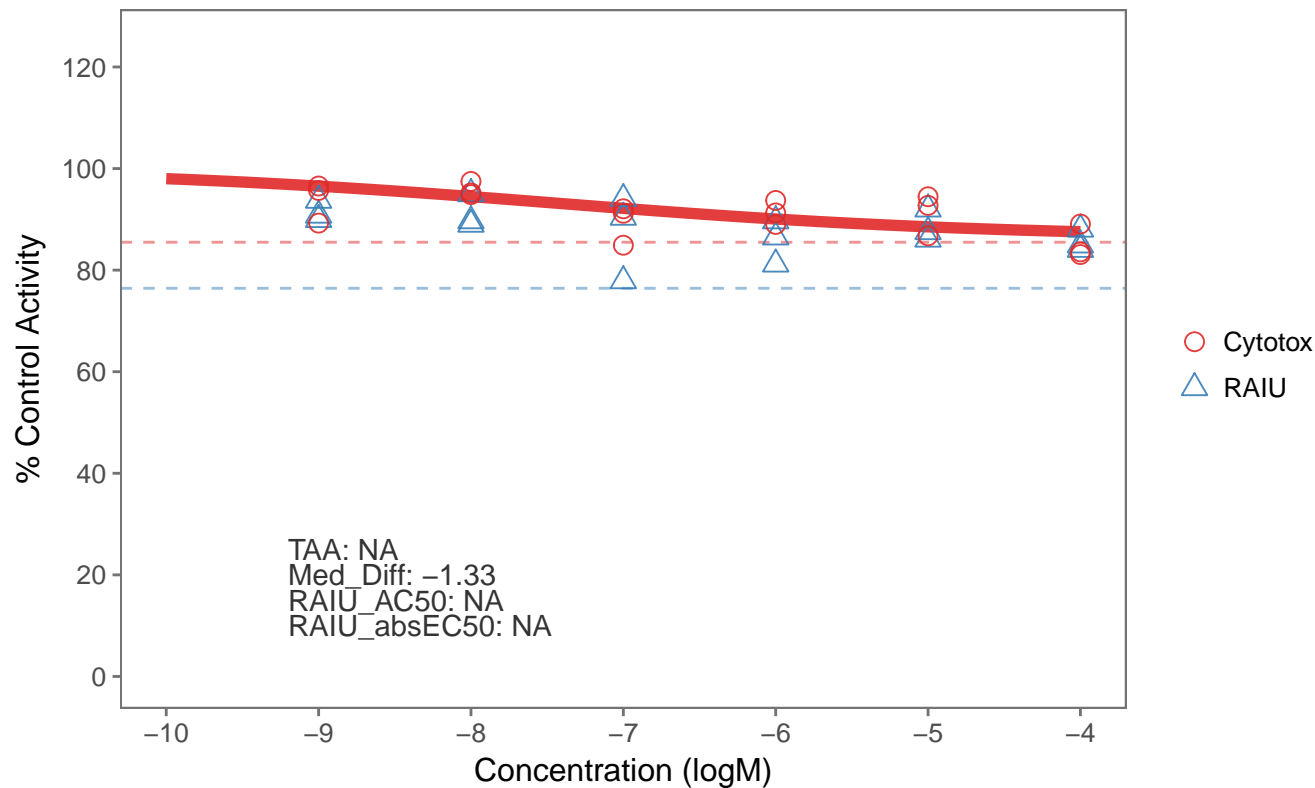

174. SPID: TP0001677B01

NAME: Phosmet

CAS NO: 732-11-6

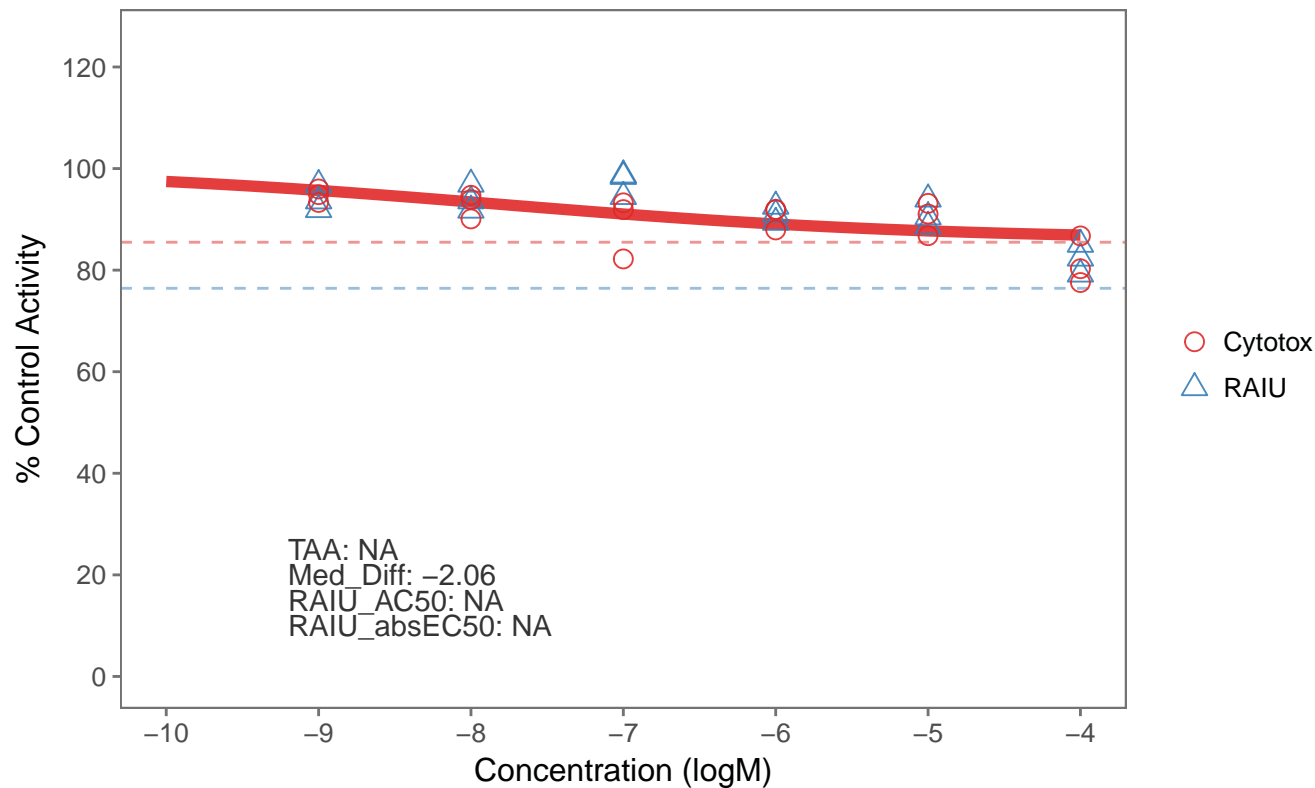

175. SPID: TP0001677C03

NAME: PFBS-K

CAS NO: 29420-49-3

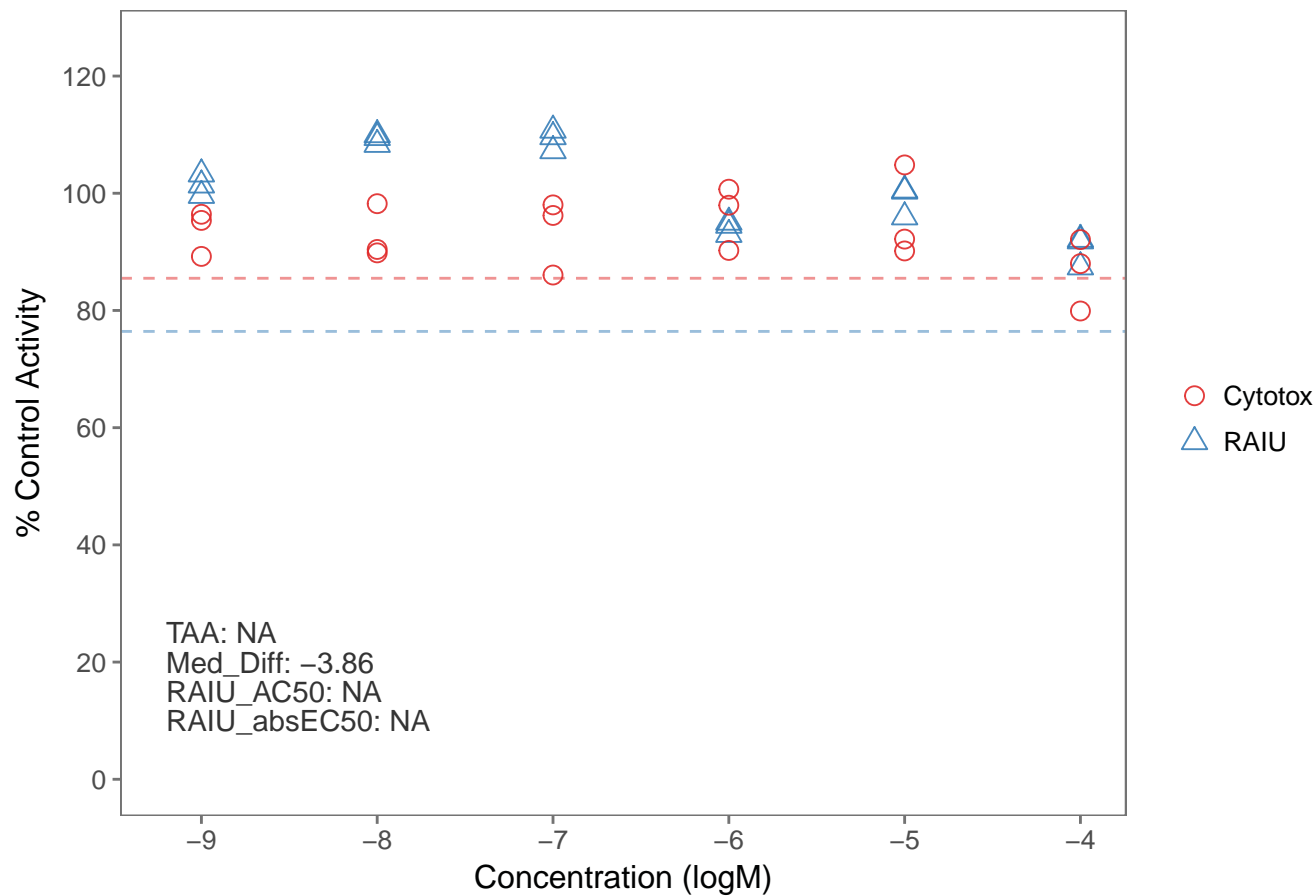

176. SPID: TP0001677C05  
NAME: 2-Chloroacetophenone  
CAS NO: 532-27-4

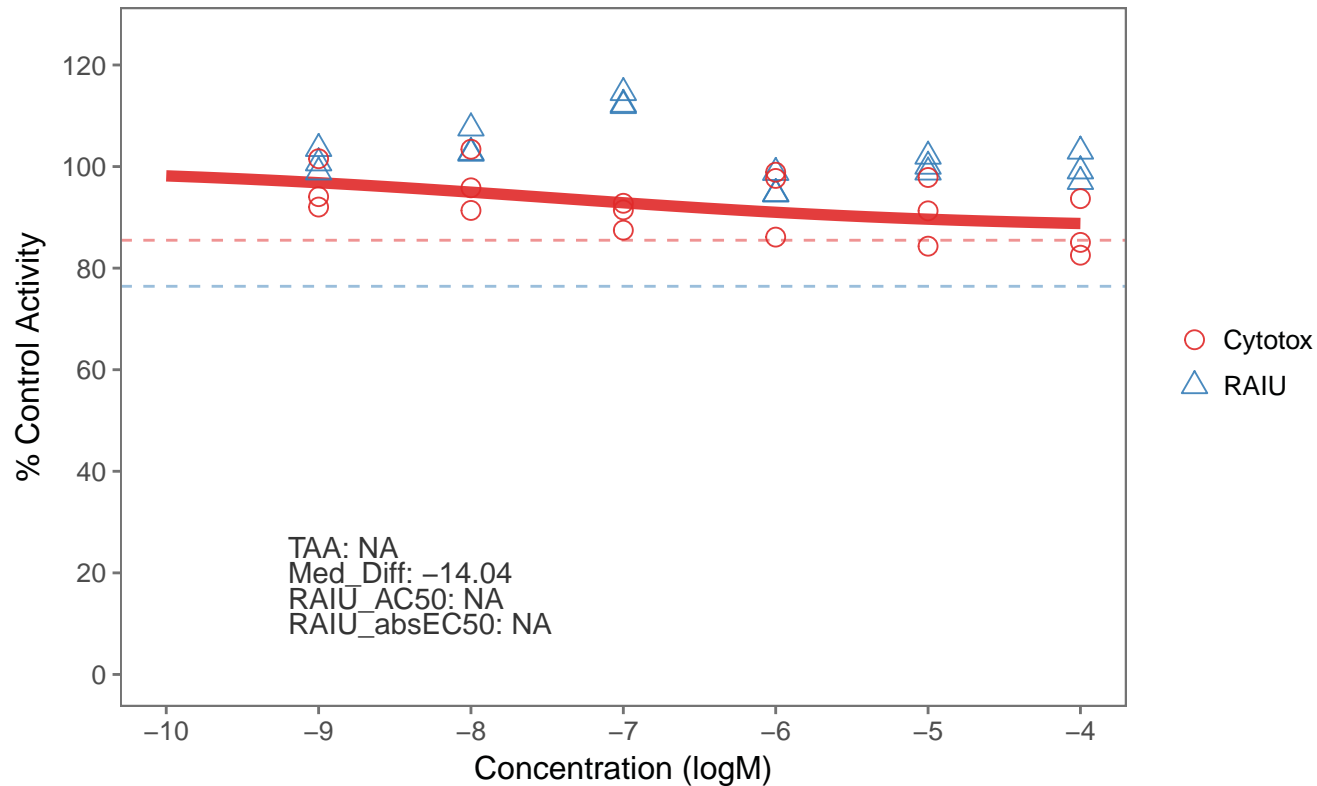



177. SPID: TP0001678E07

NAME: Dibenzofuran

CAS NO: 132-64-9

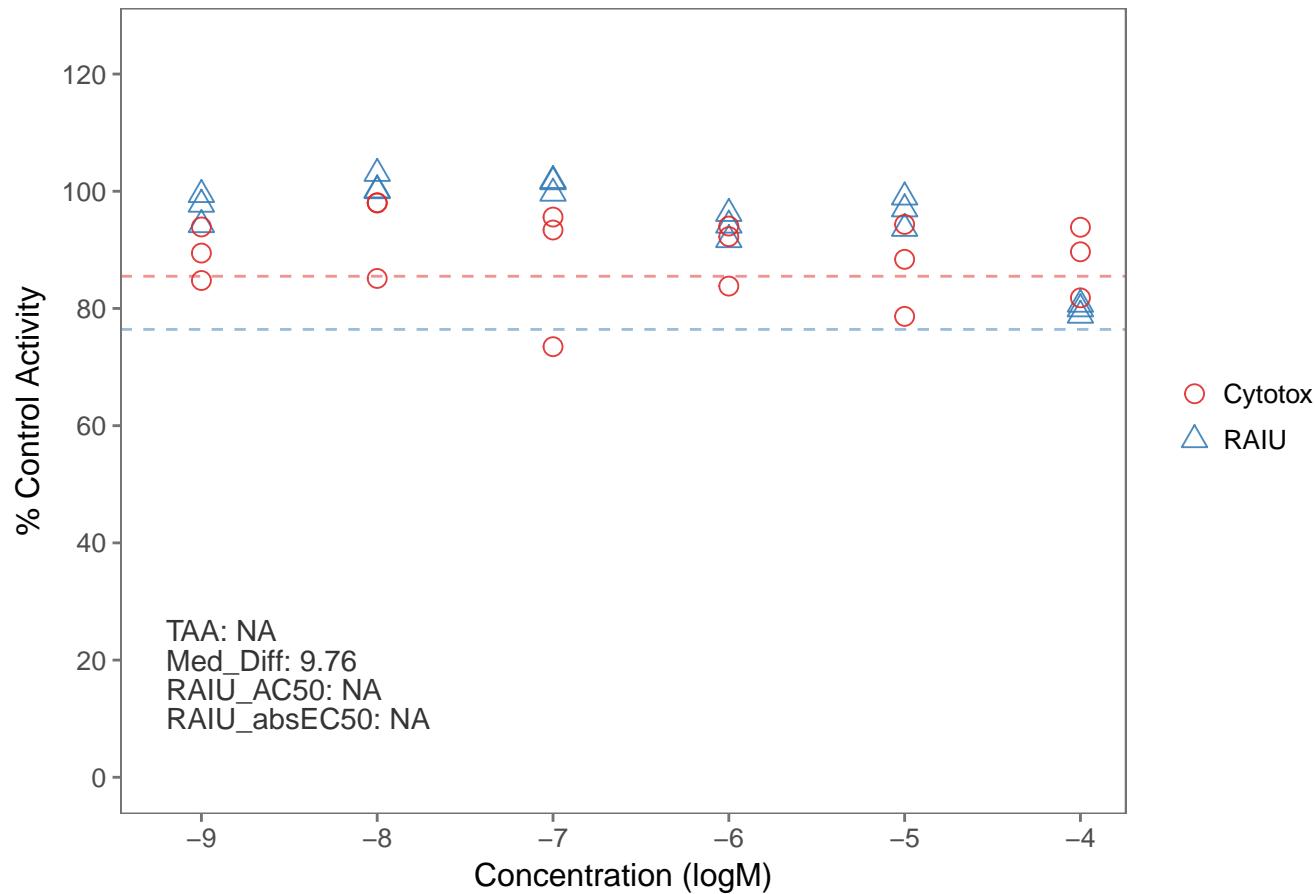

178. SPID: TP0001678F01  
NAME: SSR69071  
CAS NO: 344930-95-6

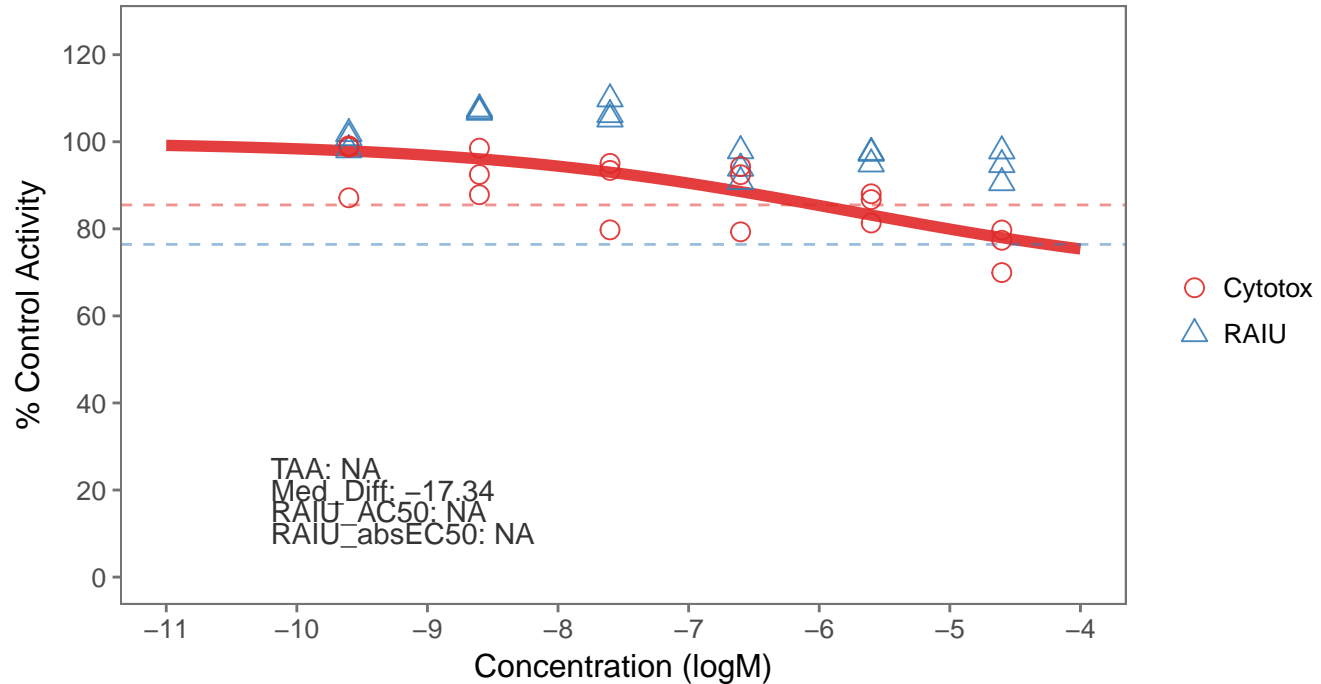

179. SPID: TP0001678F02  
NAME: Perfluoroheptanoic acid  
CAS NO: 375-85-9

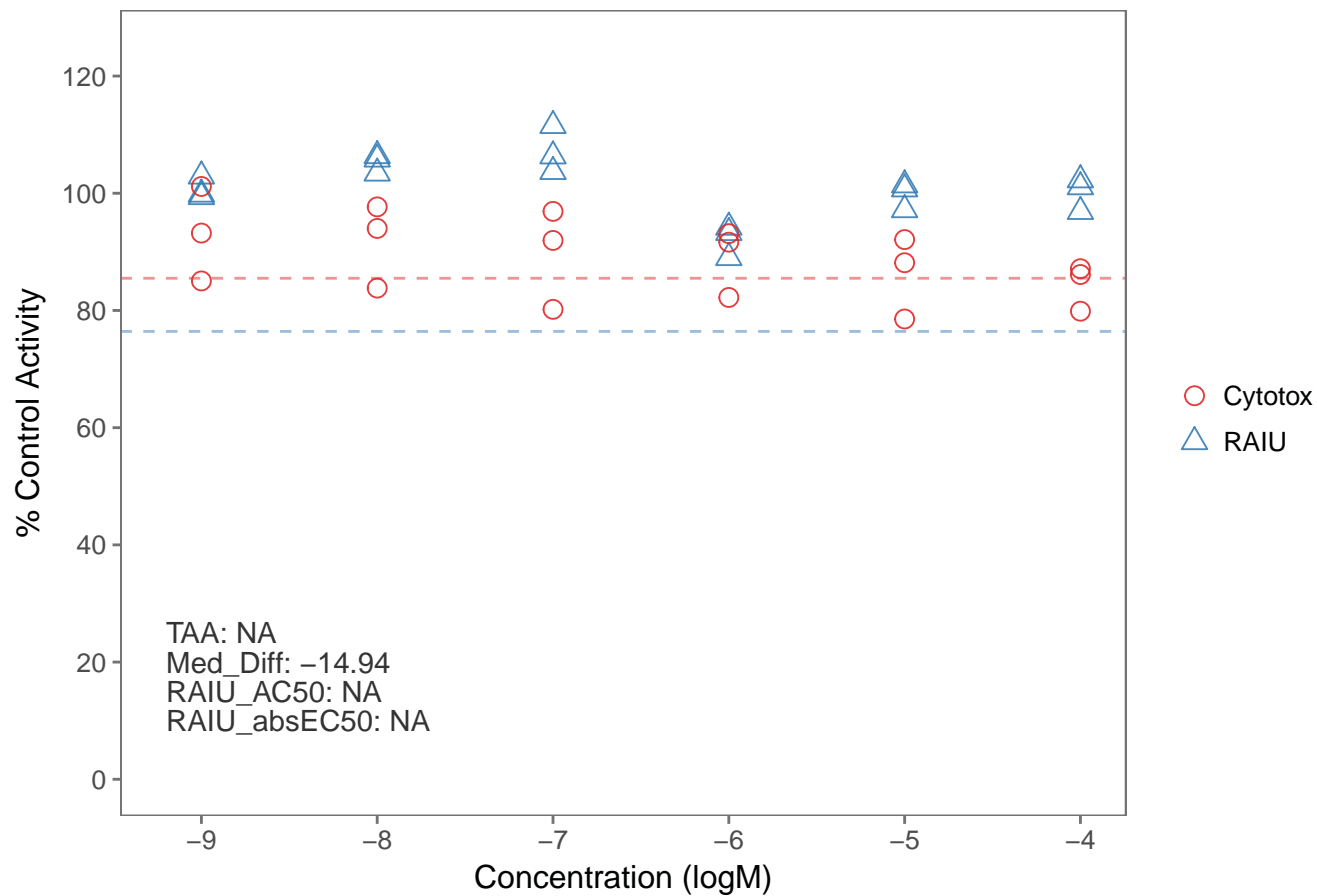

180. SPID: TP0001678G02  
NAME: Diethylene glycol dibenzoate  
CAS NO: 120-55-8

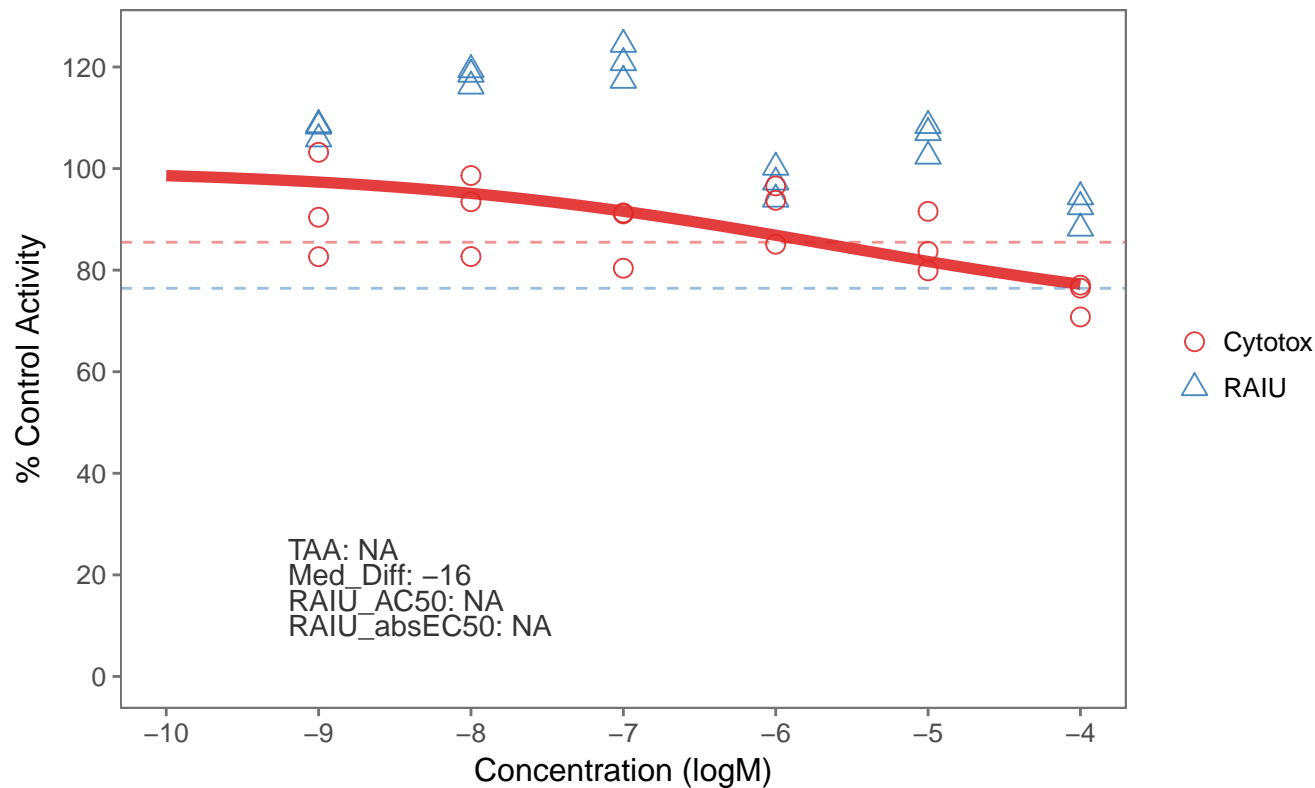

181. SPID: TP0001679C02

NAME: 4-Pentylaniline

CAS NO: 33228-44-3

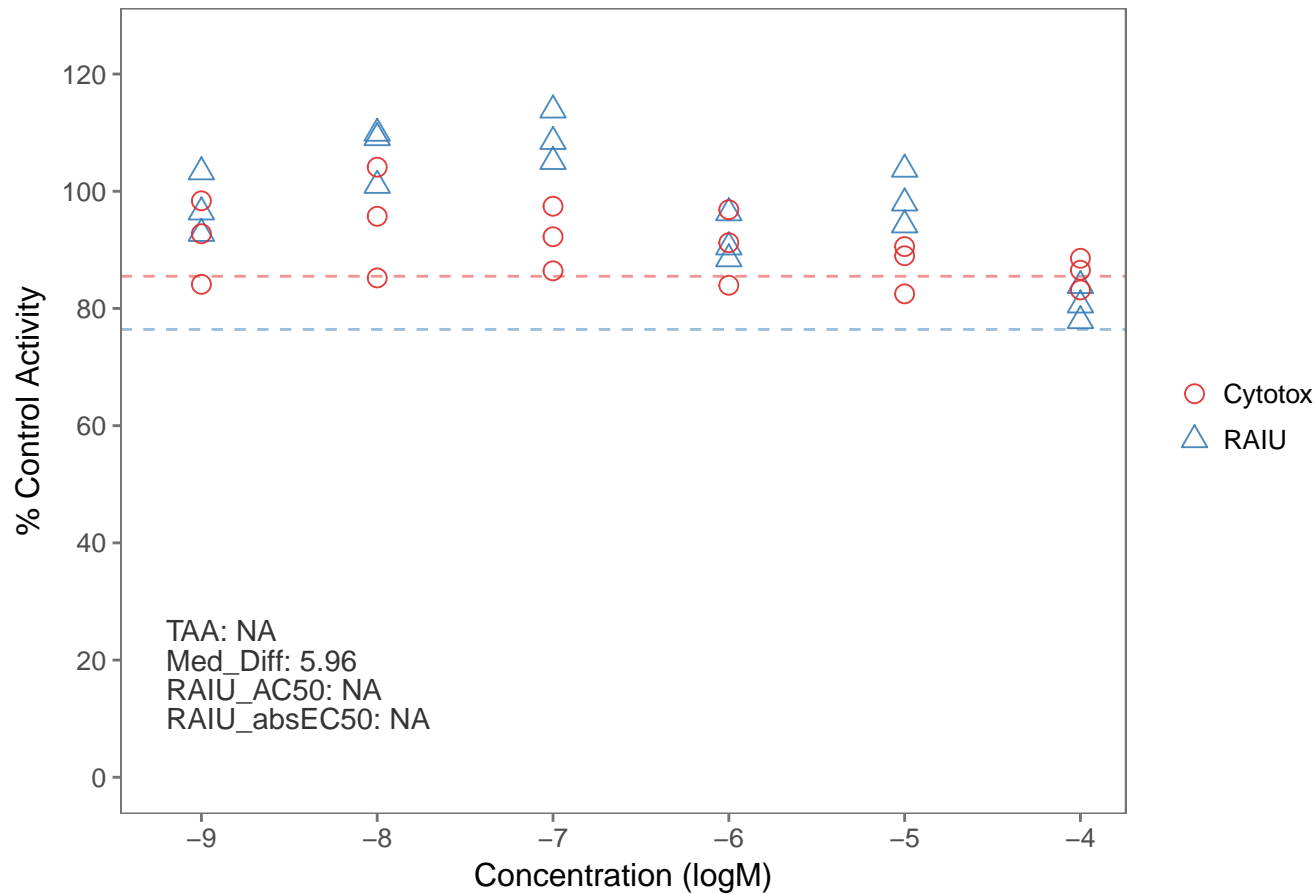

182. SPID: TP0001679C05  
NAME: 2,6-Dimethylaniline  
CAS NO: 87-62-7

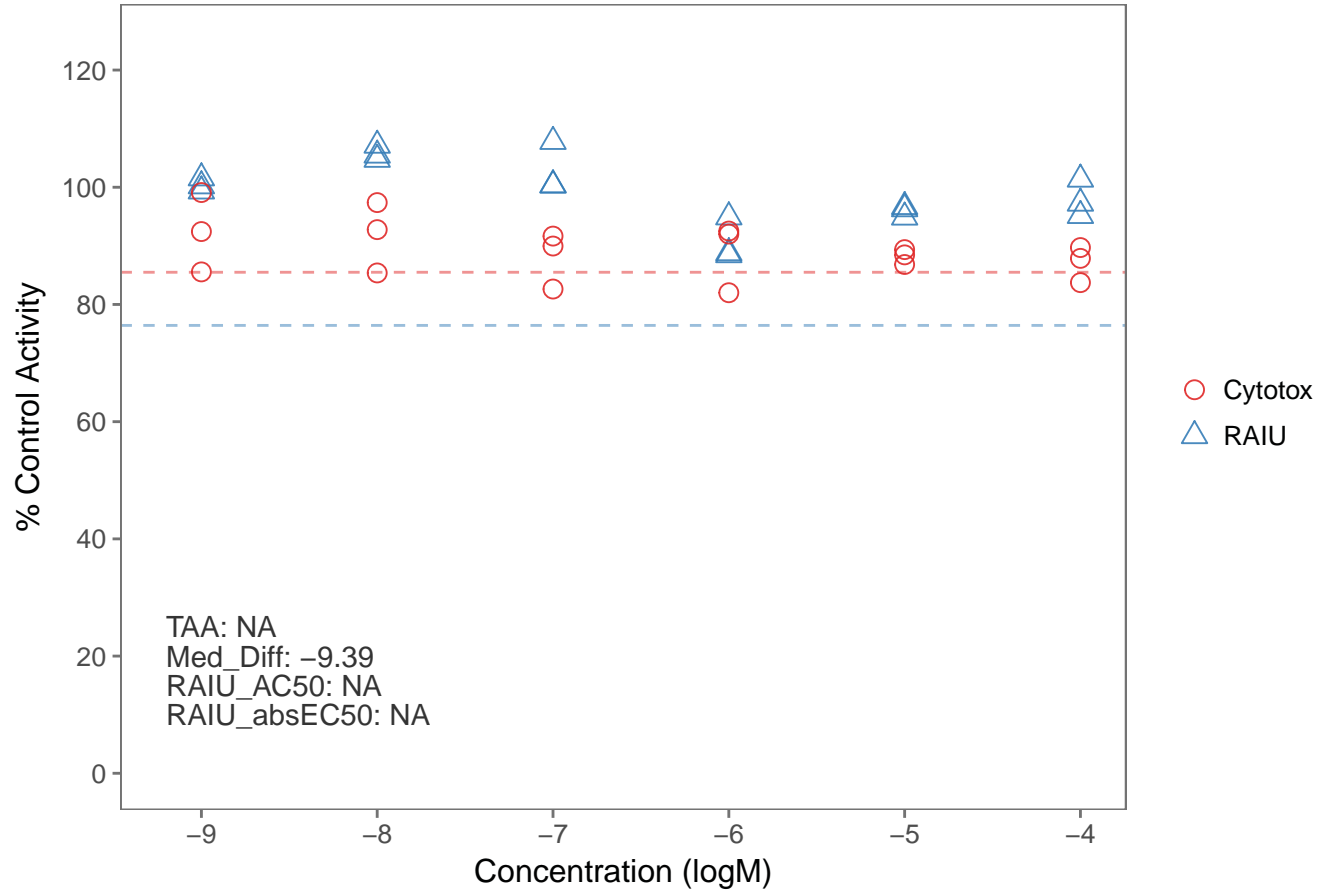

183. SPID: TP0001679E01

NAME: CP-863187

CAS NO: 668981-02-0

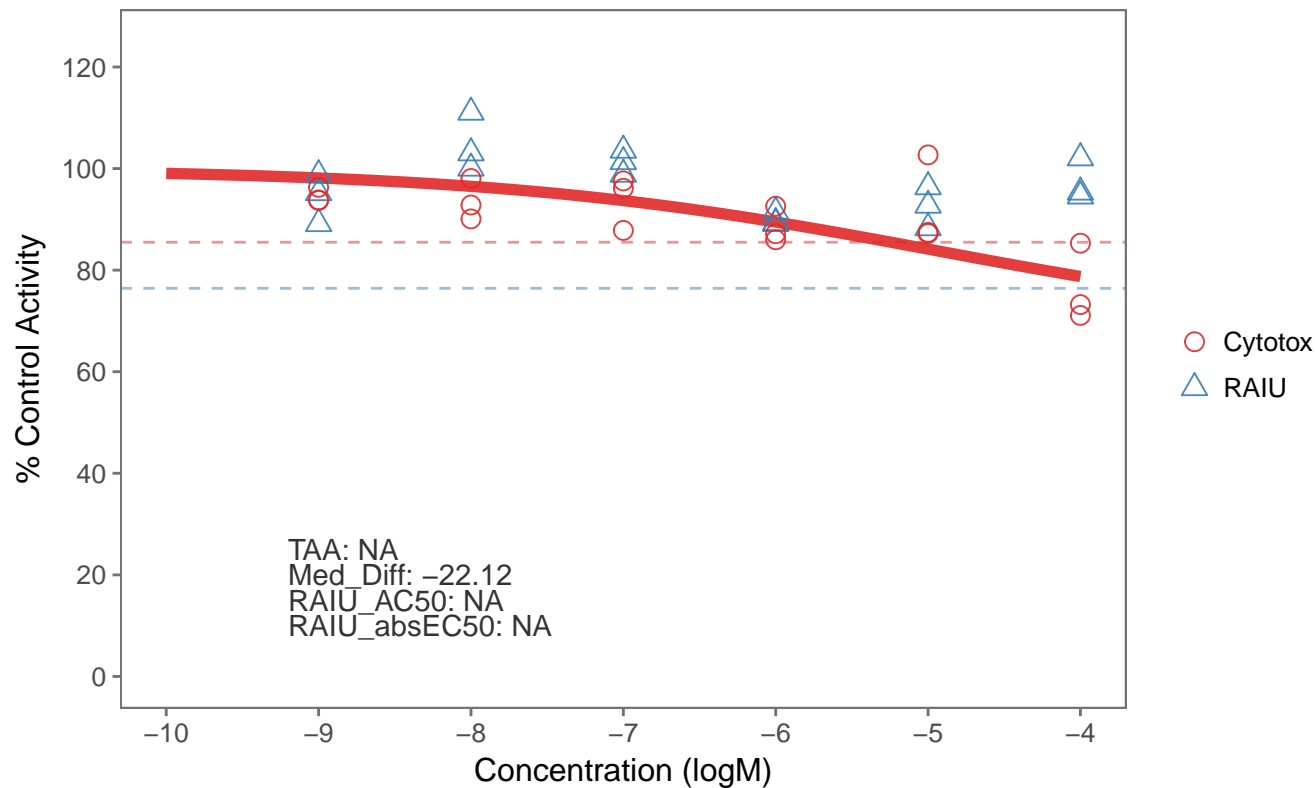

184. SPID: TP0001679E09  
NAME: Dipentyl phthalate  
CAS NO: 131-18-0

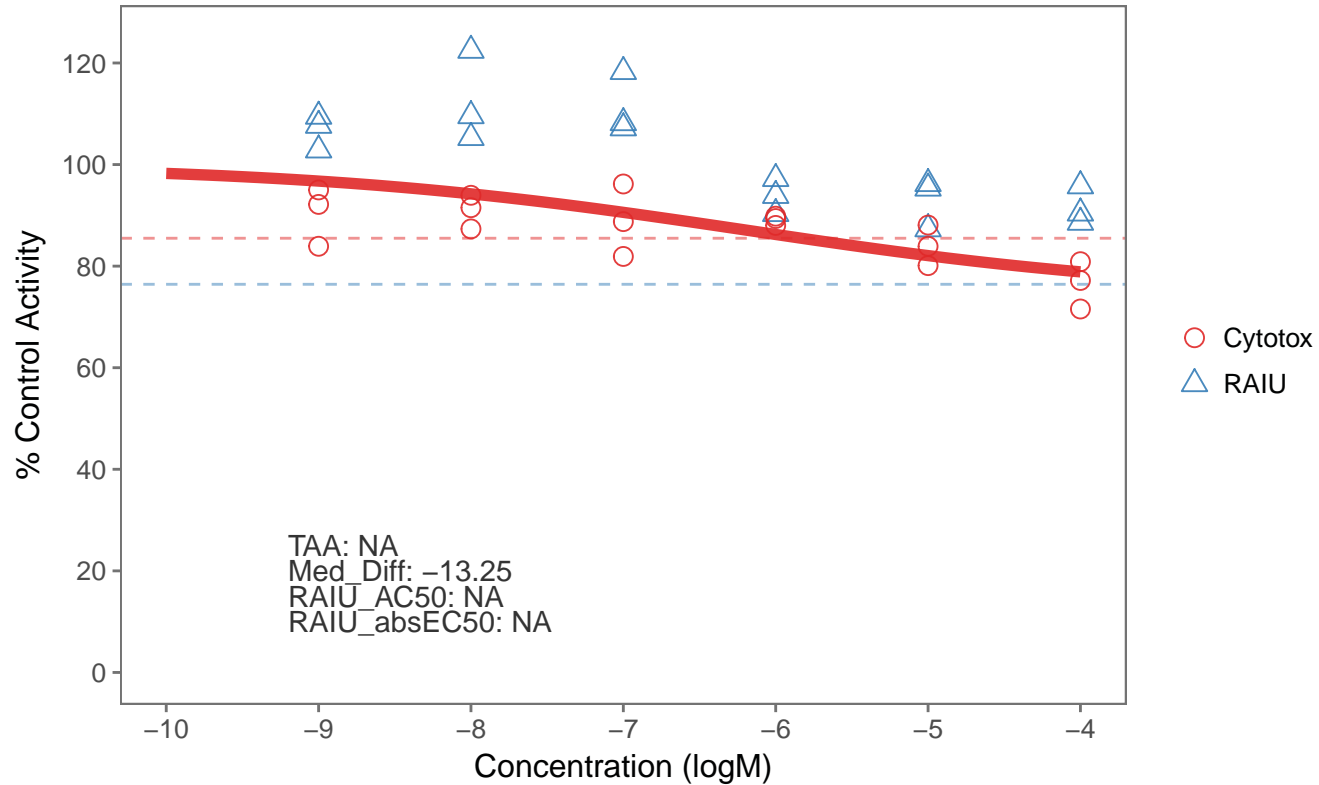



185. SPID: TP0001679G05  
NAME: Fluorene  
CAS NO: 86-73-7

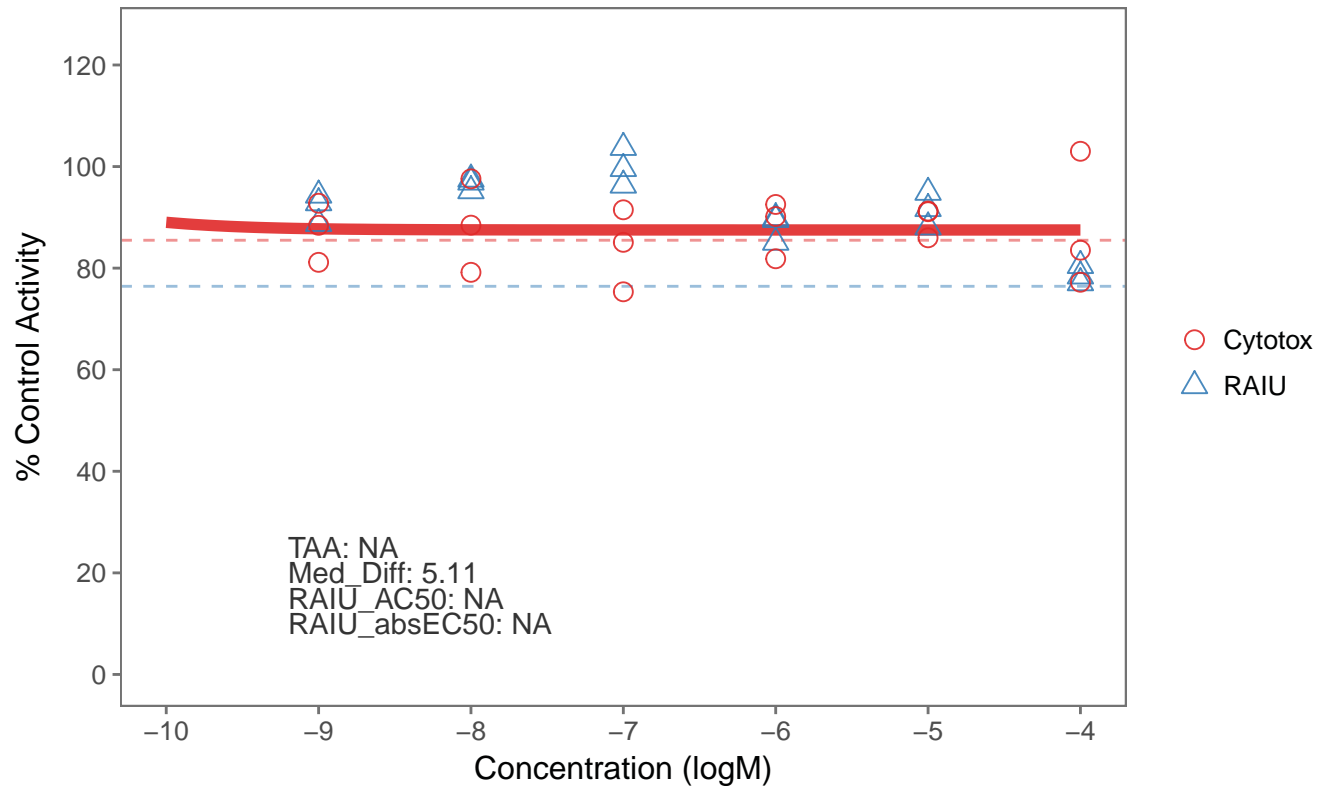

186. SPID: TP0001681B01  
NAME: Raloxifene hydrochloride  
CAS NO: 82640-04-8

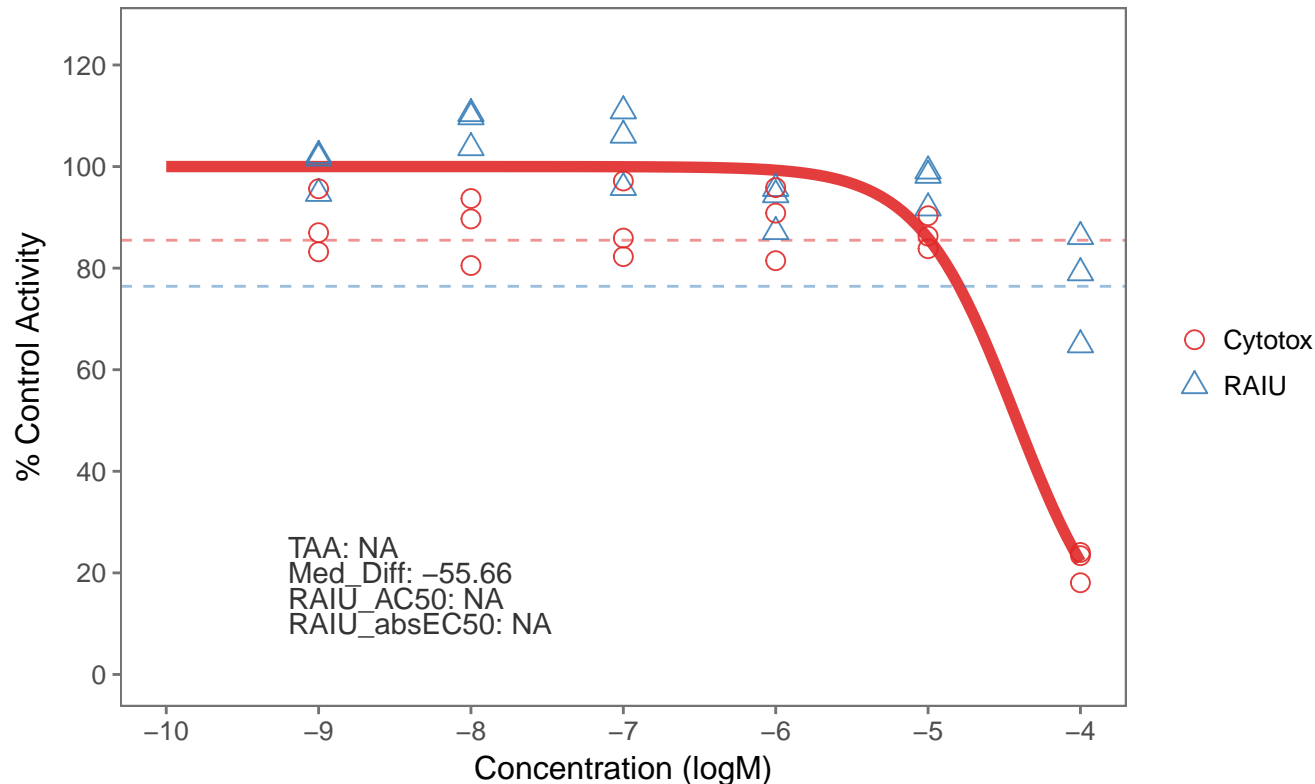

187. SPID: TP0001681E11  
NAME: Pentane-1,5-diyl dibenzoate  
CAS NO: 6624-73-3

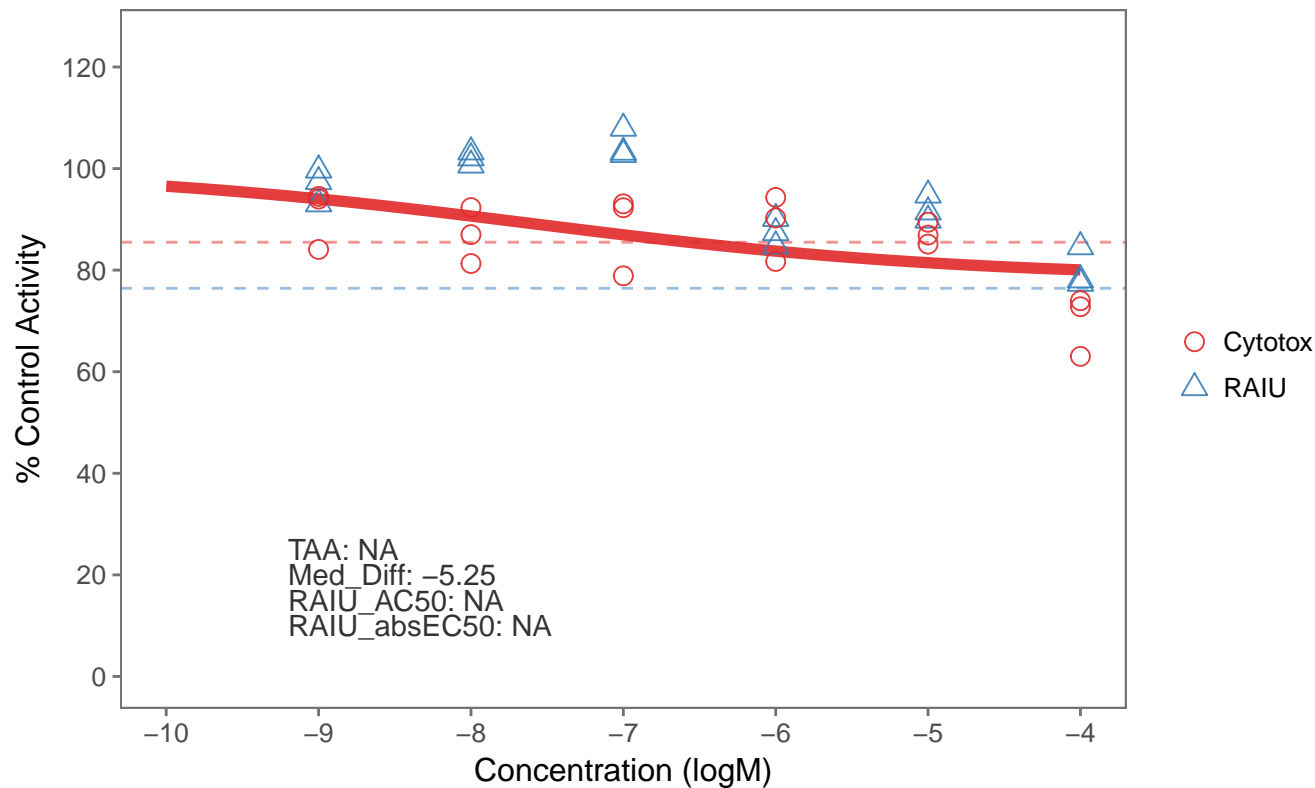

188. SPID: TP0001681F11

NAME: Mancozeb

CAS NO: 8018-01-7

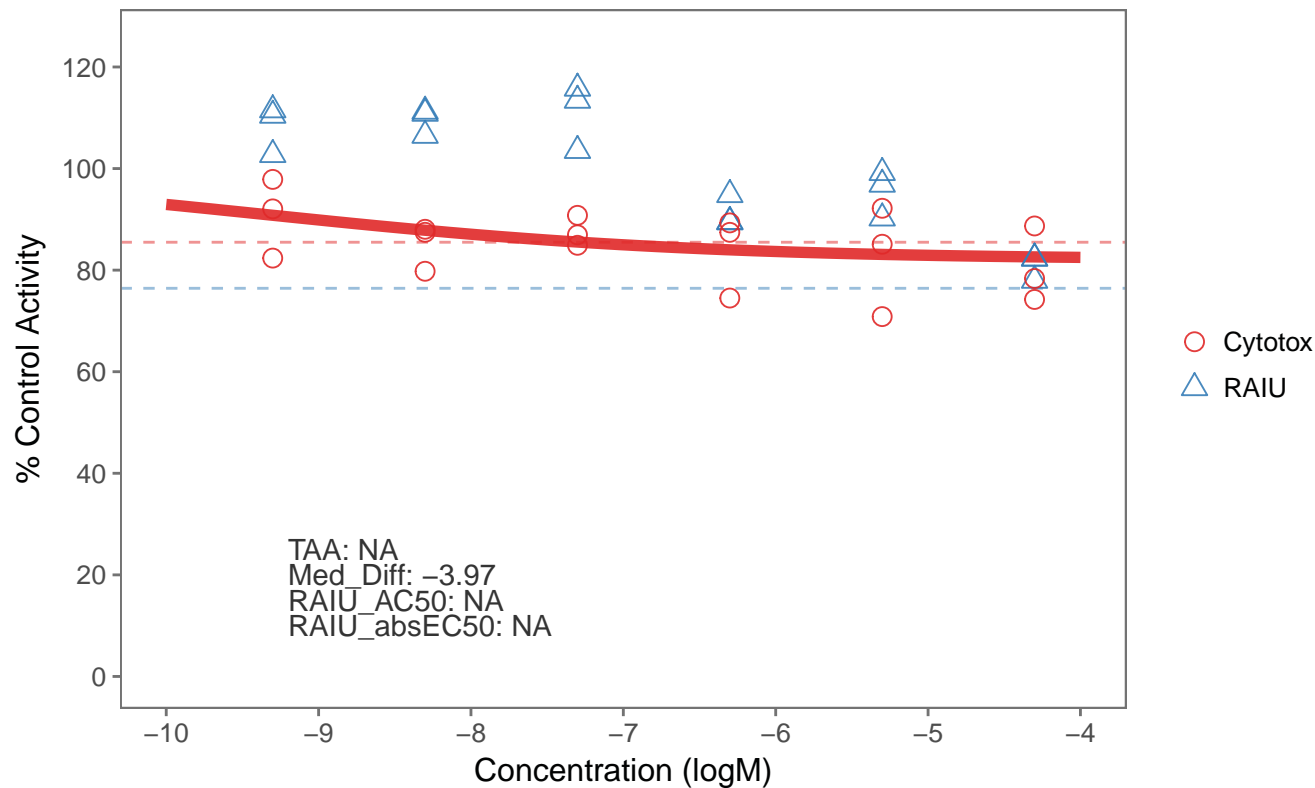

189. SPID: TP0001684B01

NAME: Tebuconazole

CAS NO: 107534-96-3

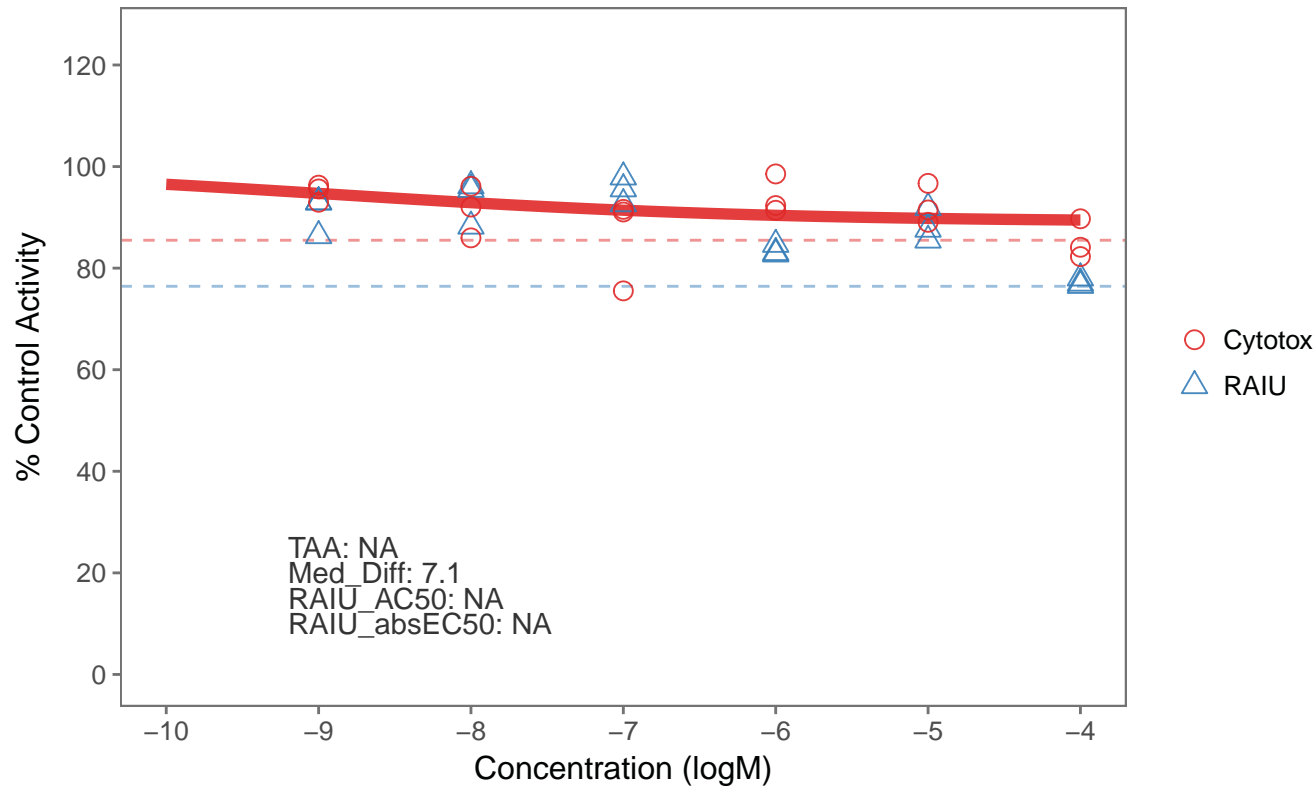

190. SPID: TP0001684C10

NAME: Surinabant

CAS NO: 288104-79-0

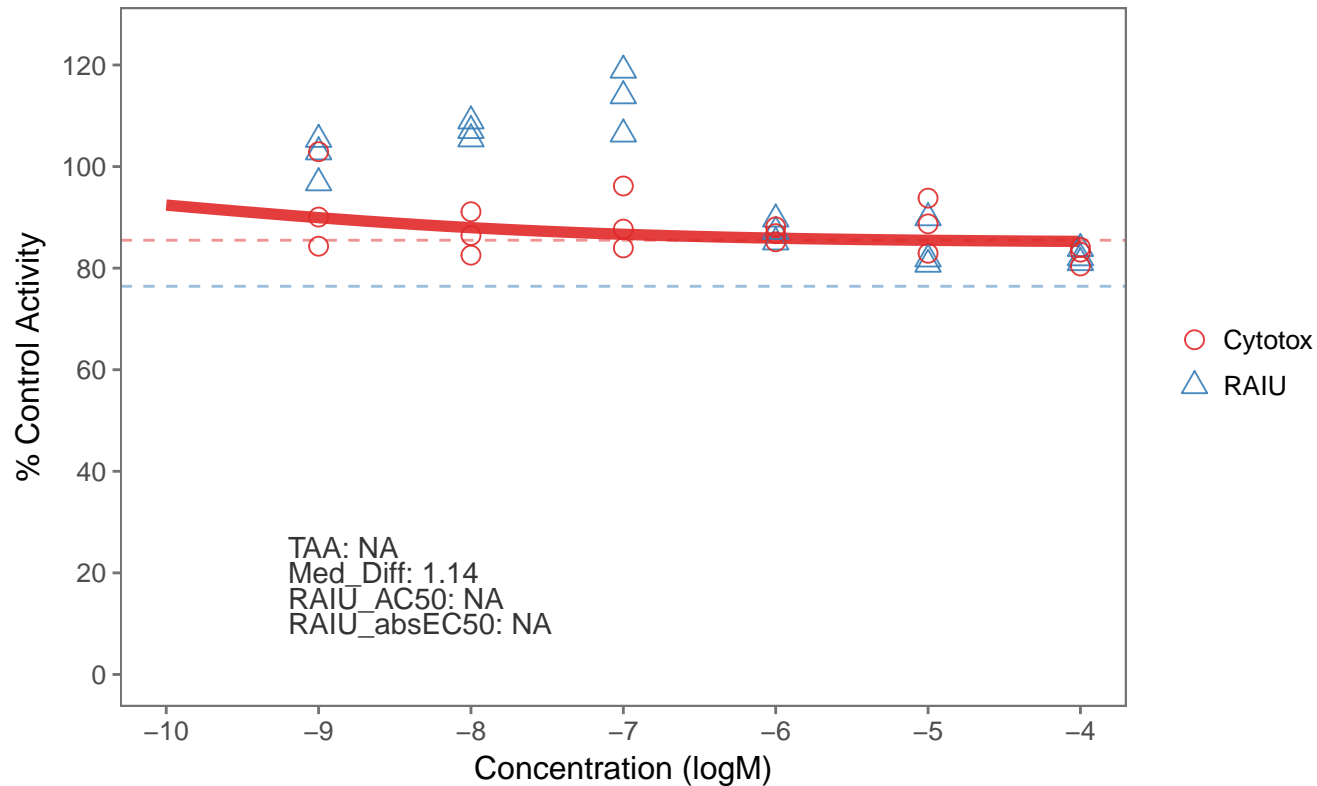

191. SPID: TP0001684F05

NAME: PFDA

CAS NO: 335-76-2

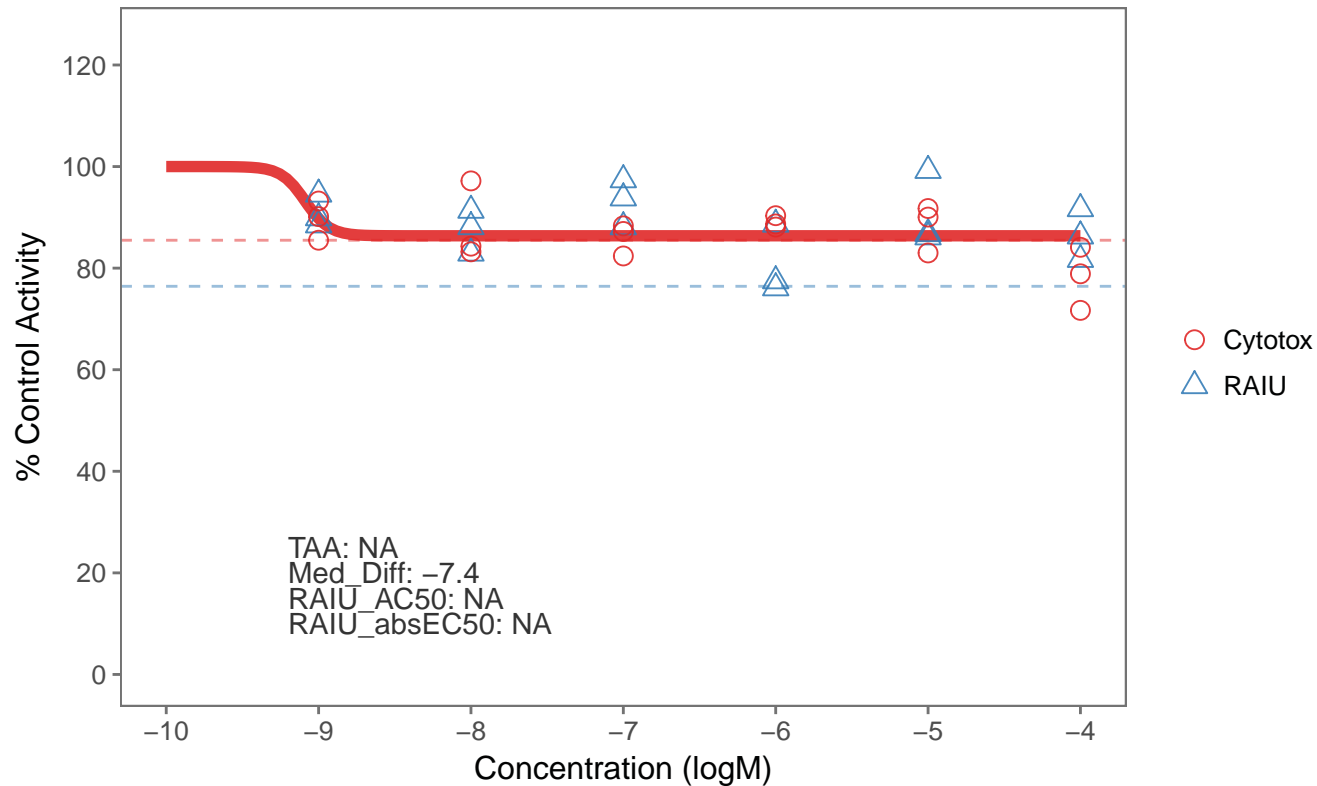

192. SPID: TP0001684G02

NAME: CI-1018

CAS NO: NOCAS\_47248

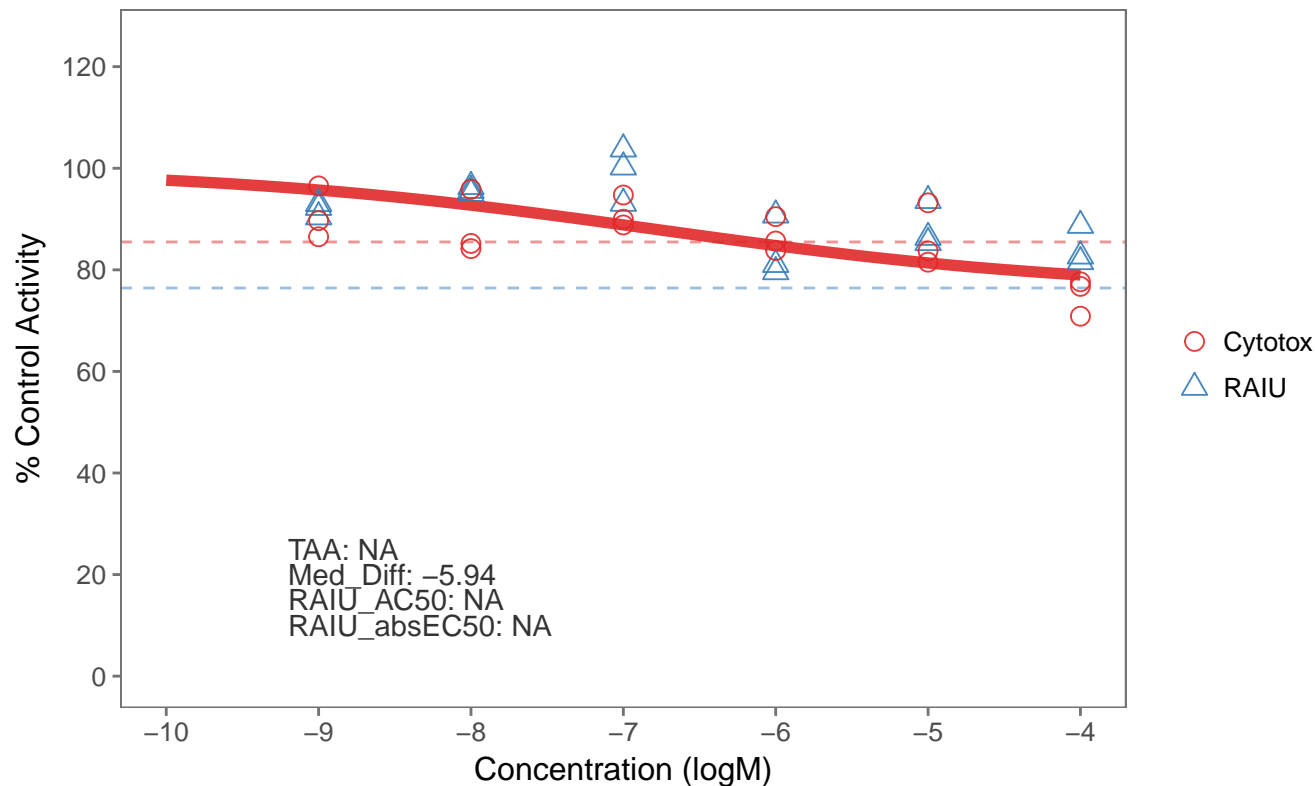



193. SPID: TP0001682D08

NAME: SAR 150640

CAS NO: 433212-21-6

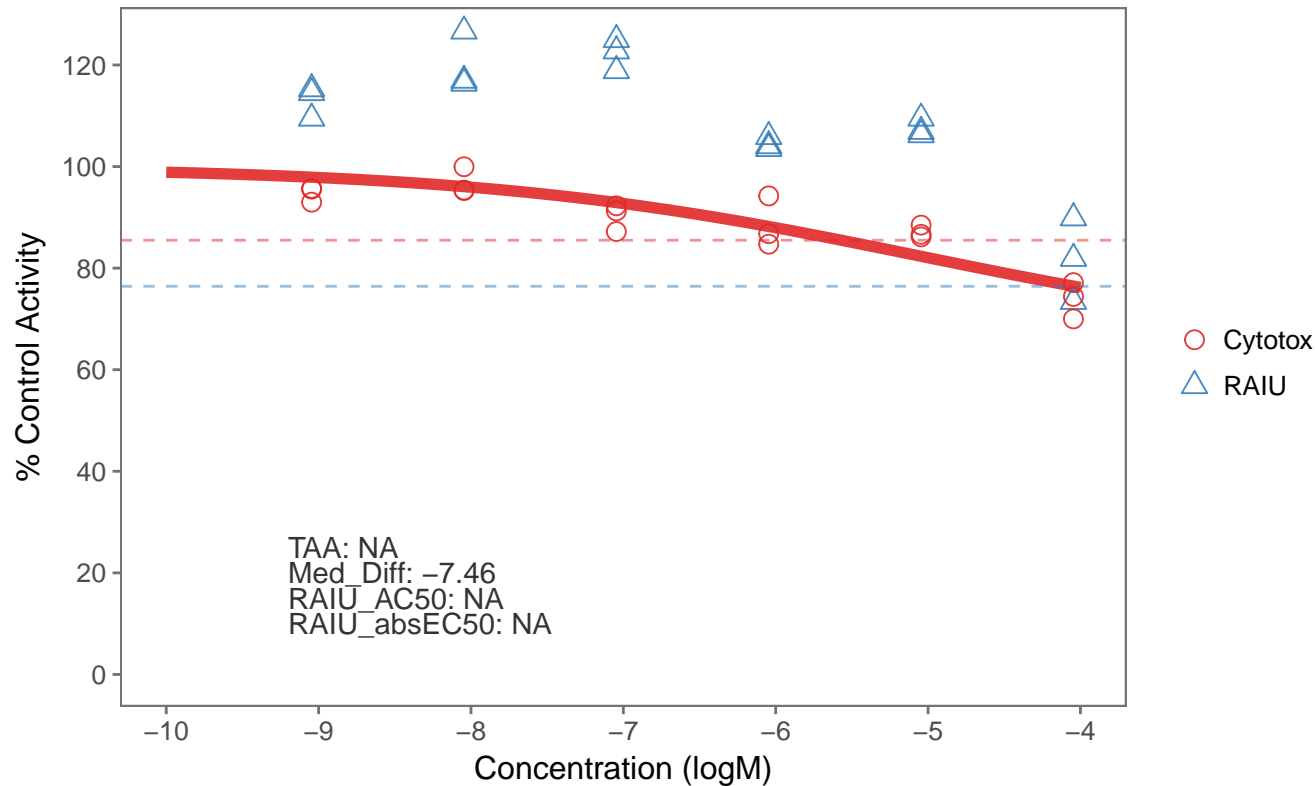

194. SPID: TP0001682E01

NAME: Butyl benzoate

CAS NO: 136-60-7

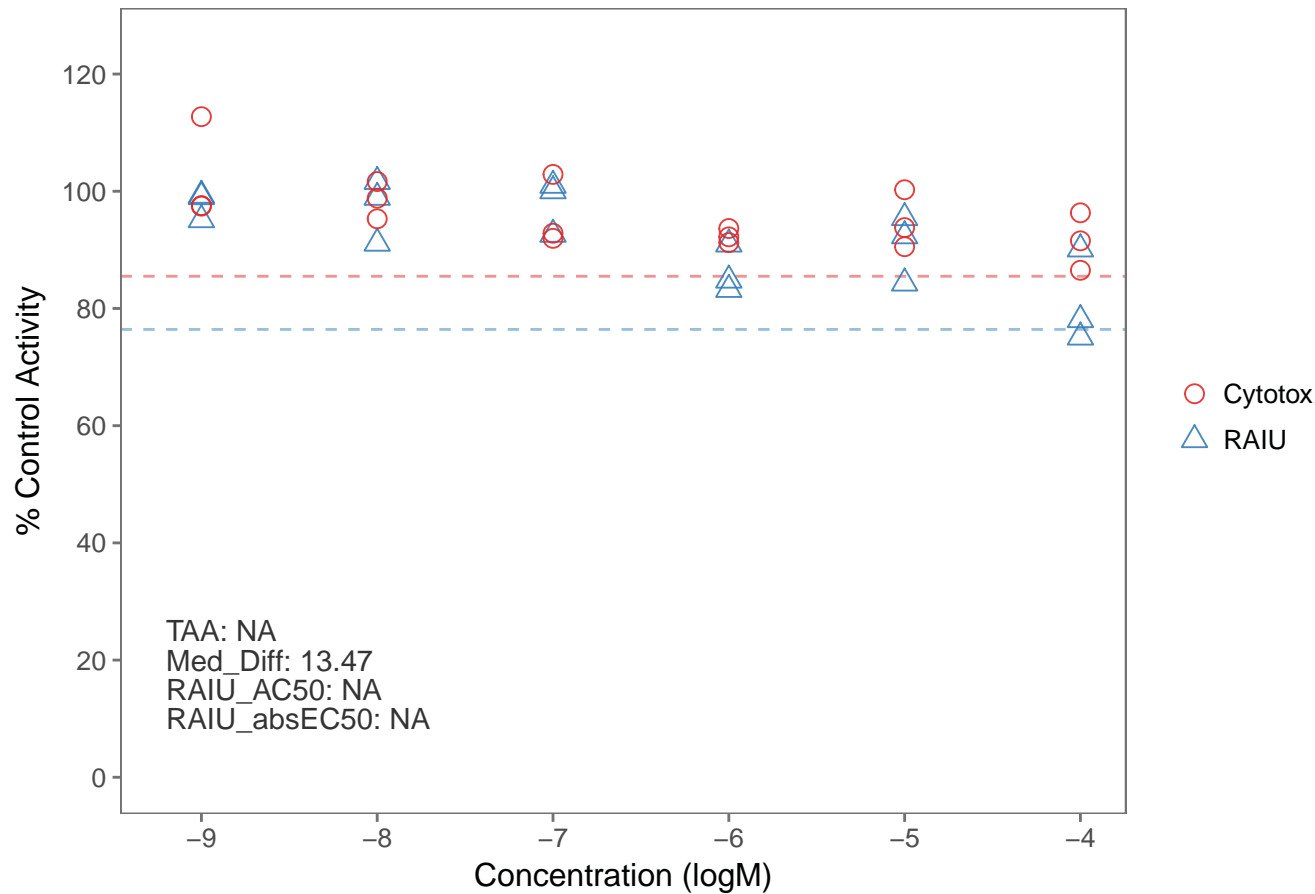

195. SPID: TP0001682G03

NAME: PFNA

CAS NO: 375-95-1

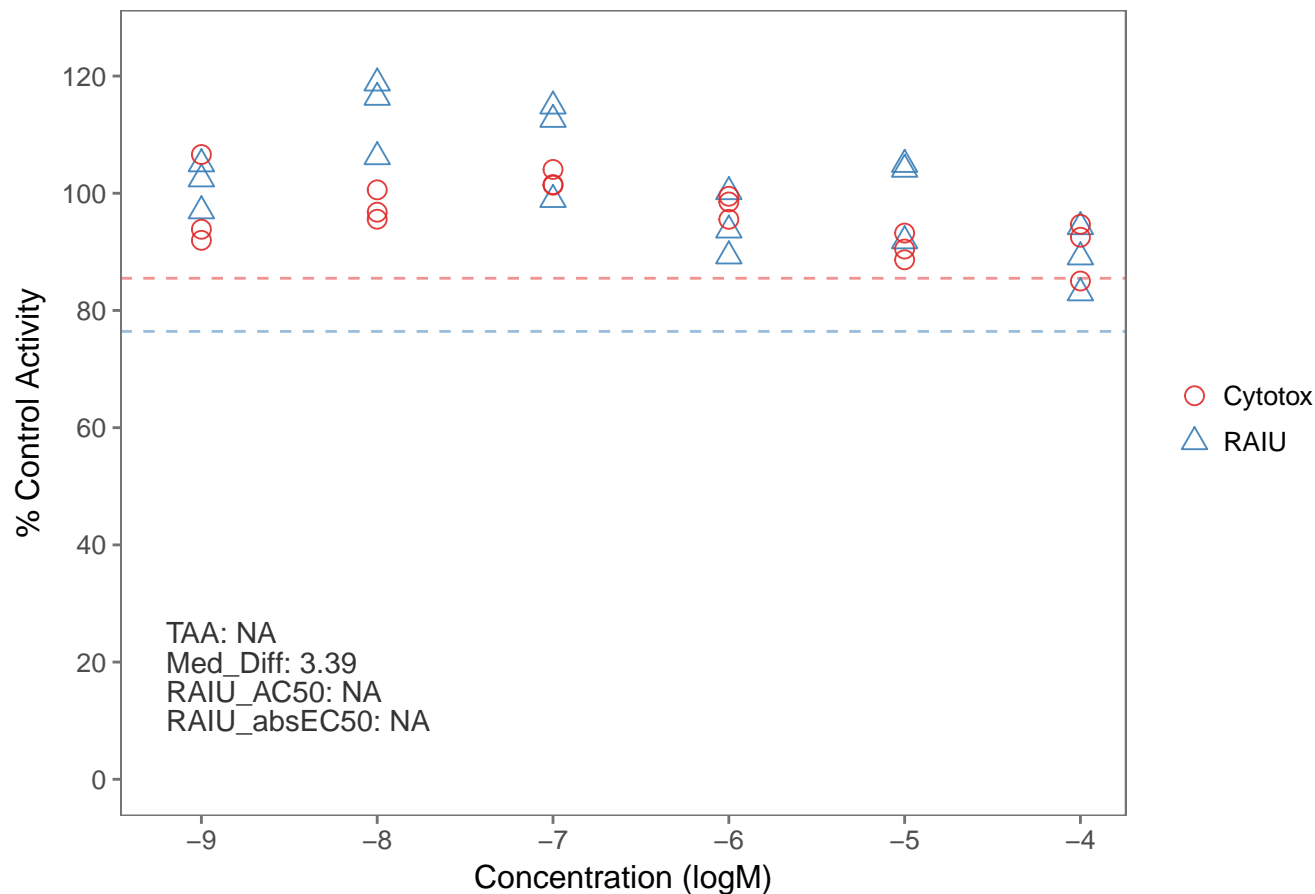

196. SPID: TP0001682G08

NAME: Oryzalin

CAS NO: 19044-88-3

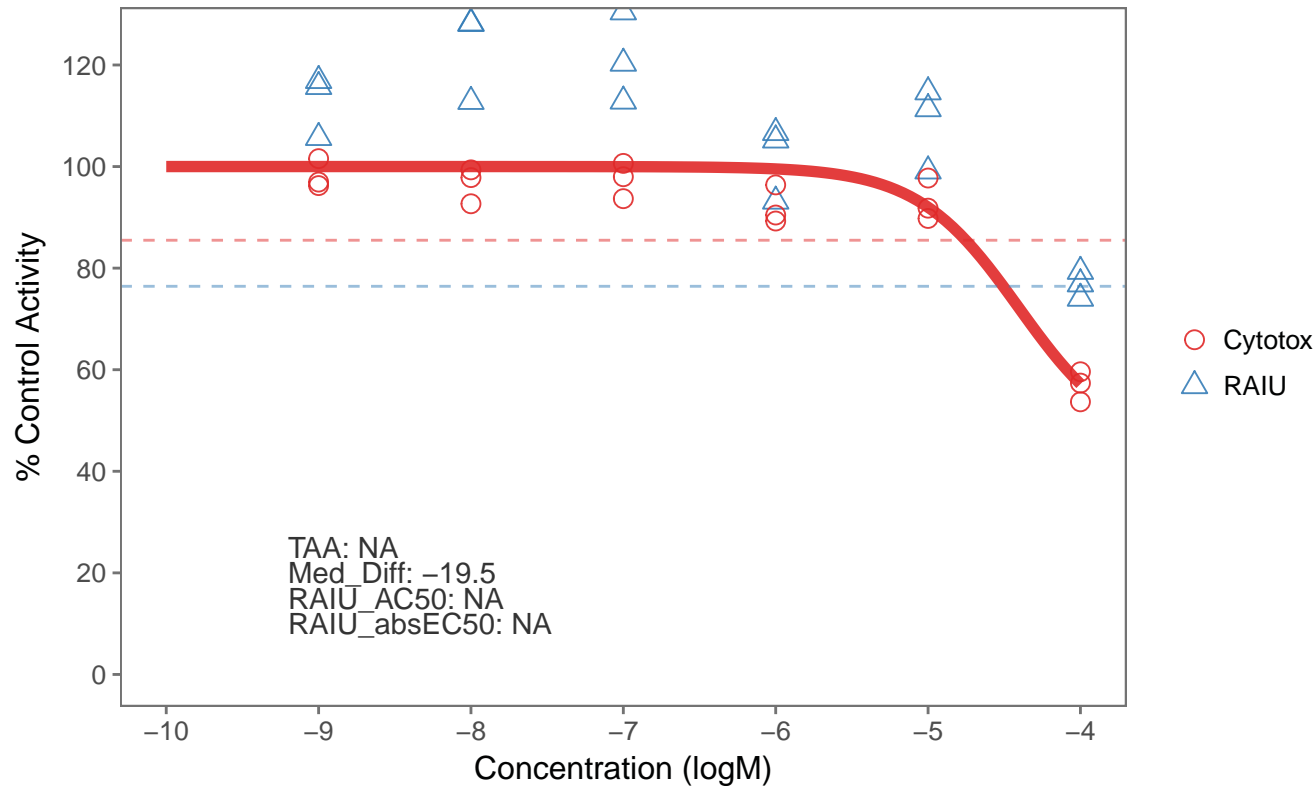

197. SPID: TP0001683C10  
NAME: PharmaGSID\_48510  
CAS NO: 460081-99-6

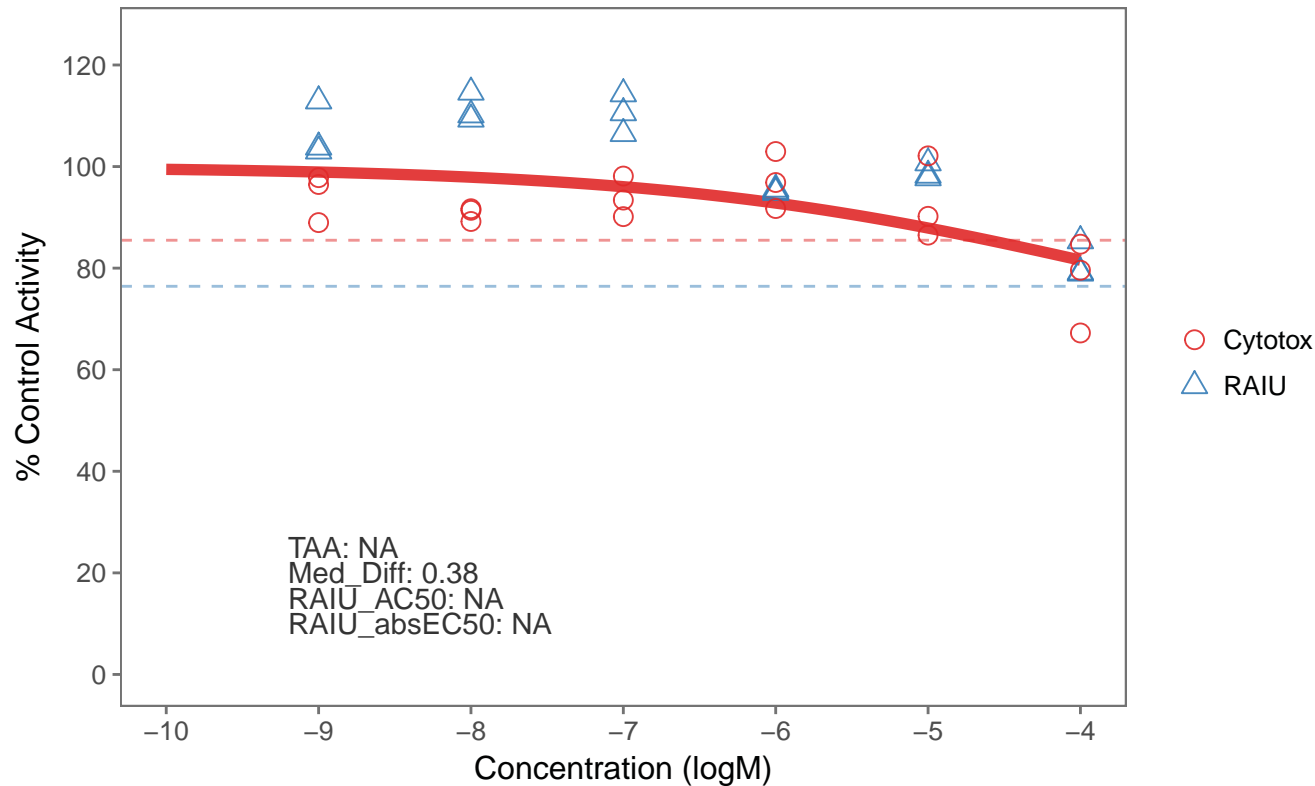

198. SPID: TP0001683D01

NAME: FR167356

CAS NO: 174185-16-1

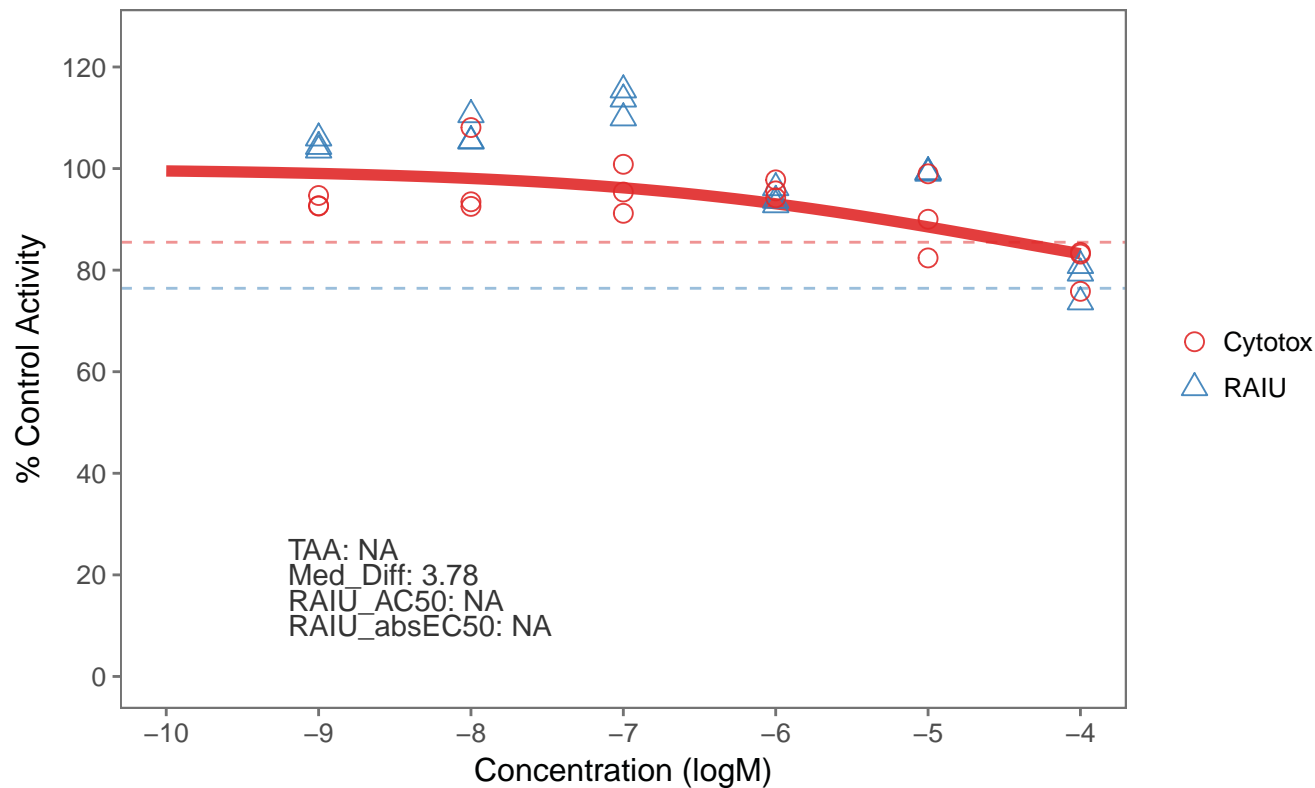

199. SPID: TP0001683E01

NAME: UK-373911

CAS NO: 291305-06-1

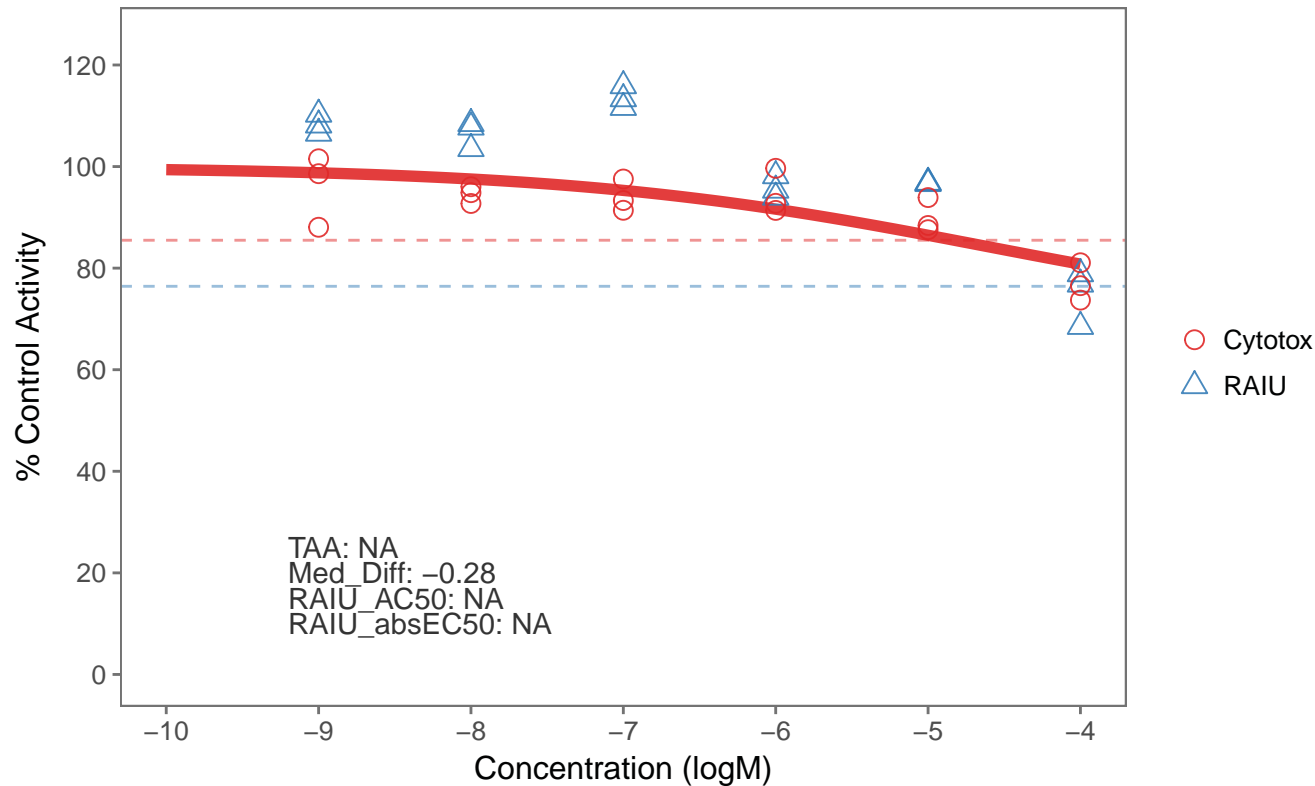

200. SPID: TP0001677E02

NAME: Triacetin

CAS NO: 102-76-1

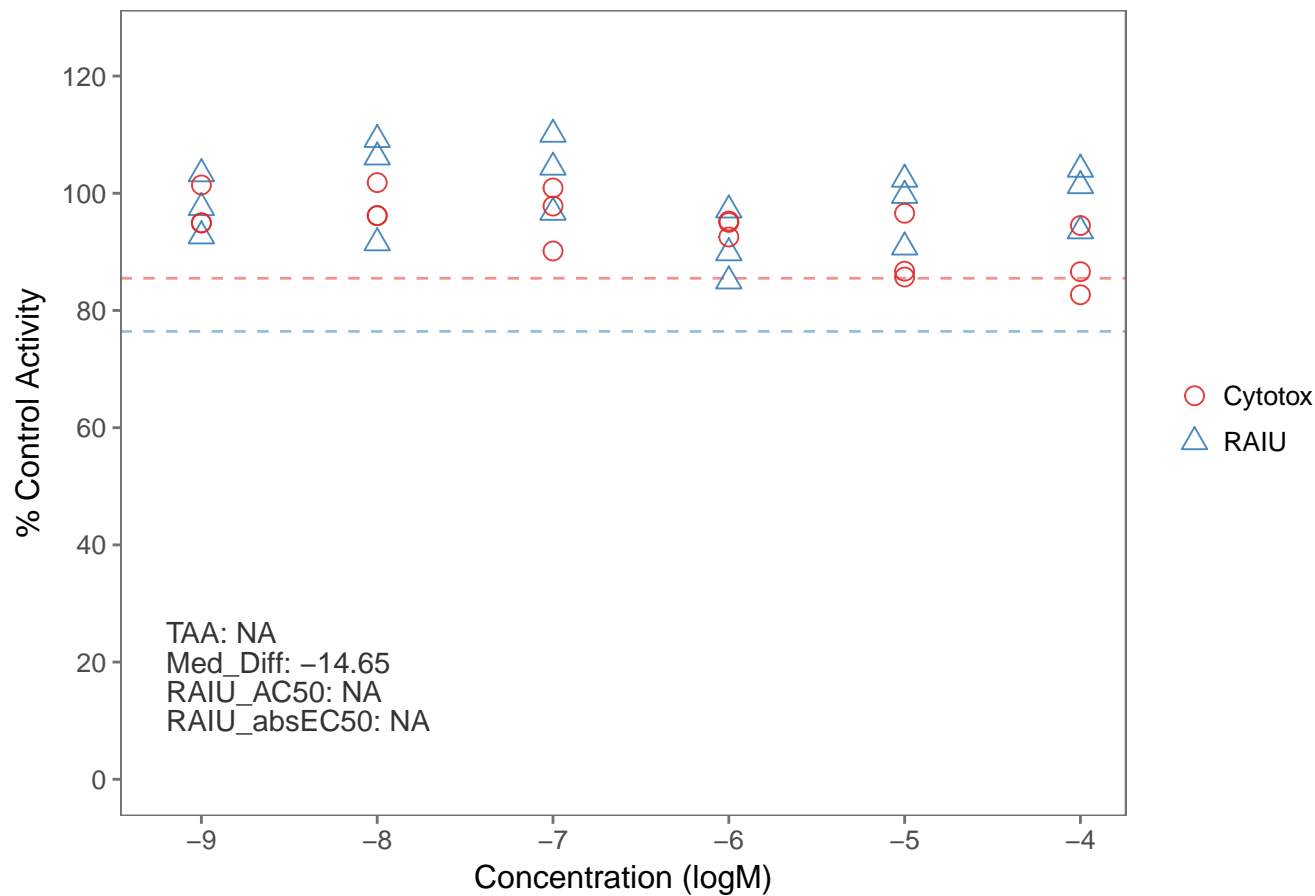



201. SPID: TP0001677E03  
NAME: N-Nitrosodiphenylamine  
CAS NO: 86-30-6

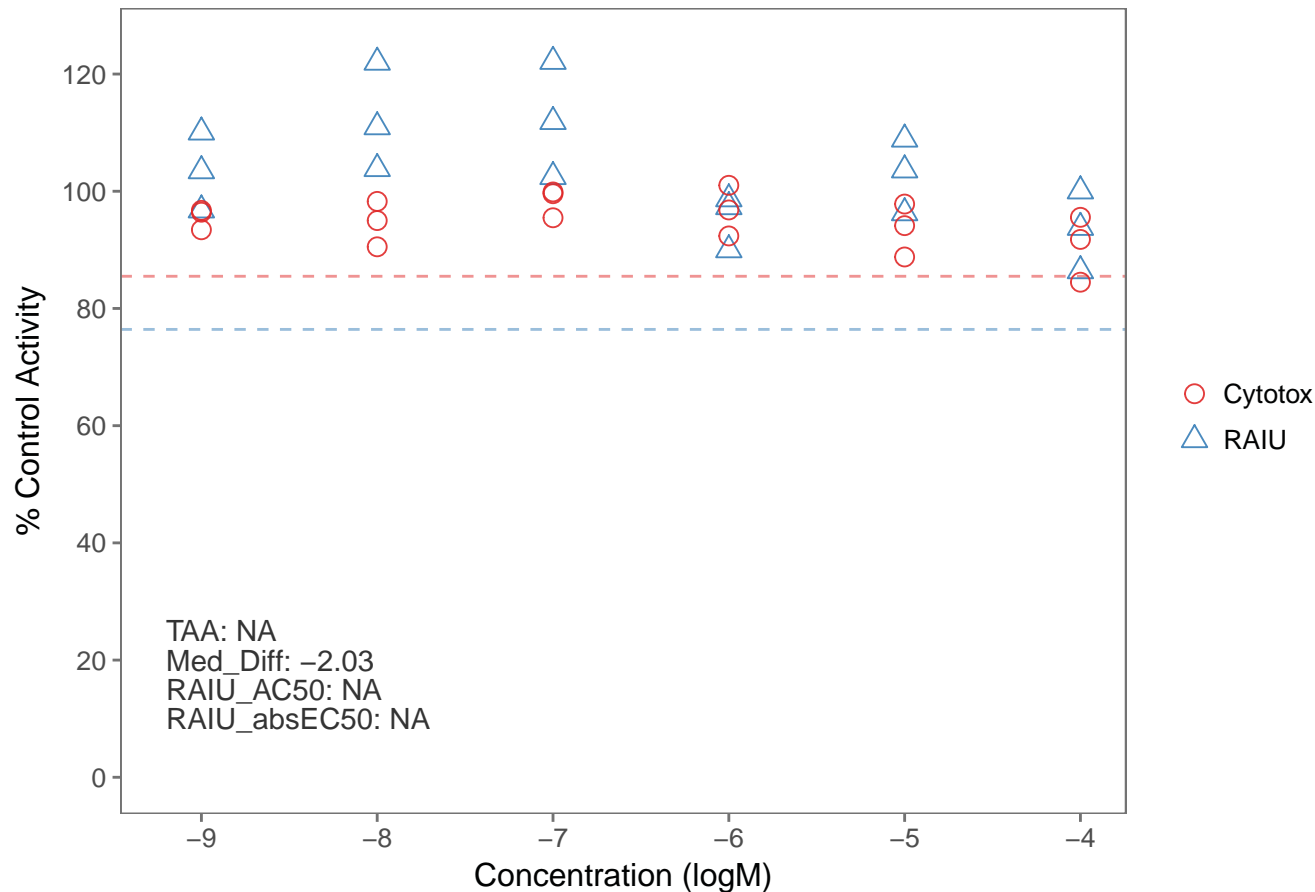

202. SPID: TP0001677G02

NAME: Biphenyl

CAS NO: 92-52-4

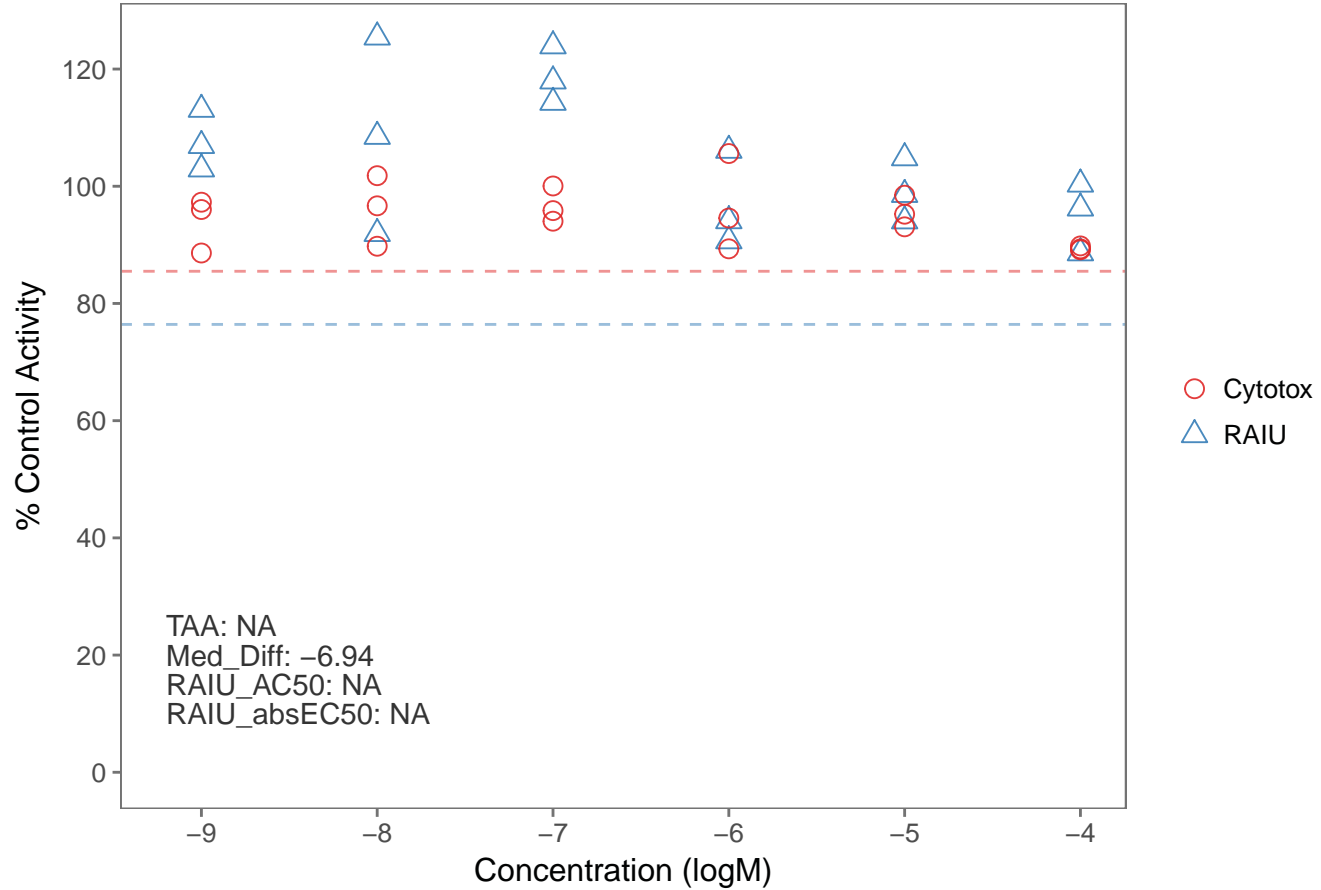

203. SPID: TP0001677G03

NAME: SSR146977

CAS NO: 264618-44-2

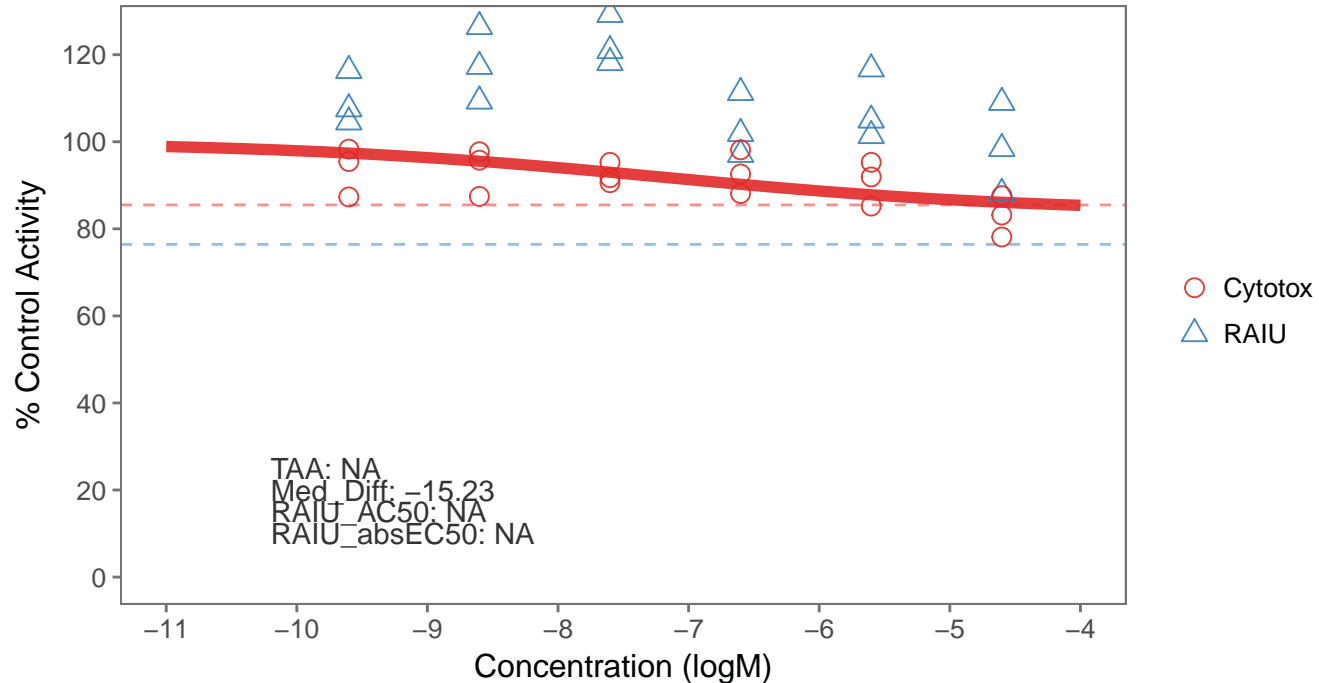

204. SPID: TP0001683F02  
NAME: Pentachloropyridine  
CAS NO: 2176-62-7

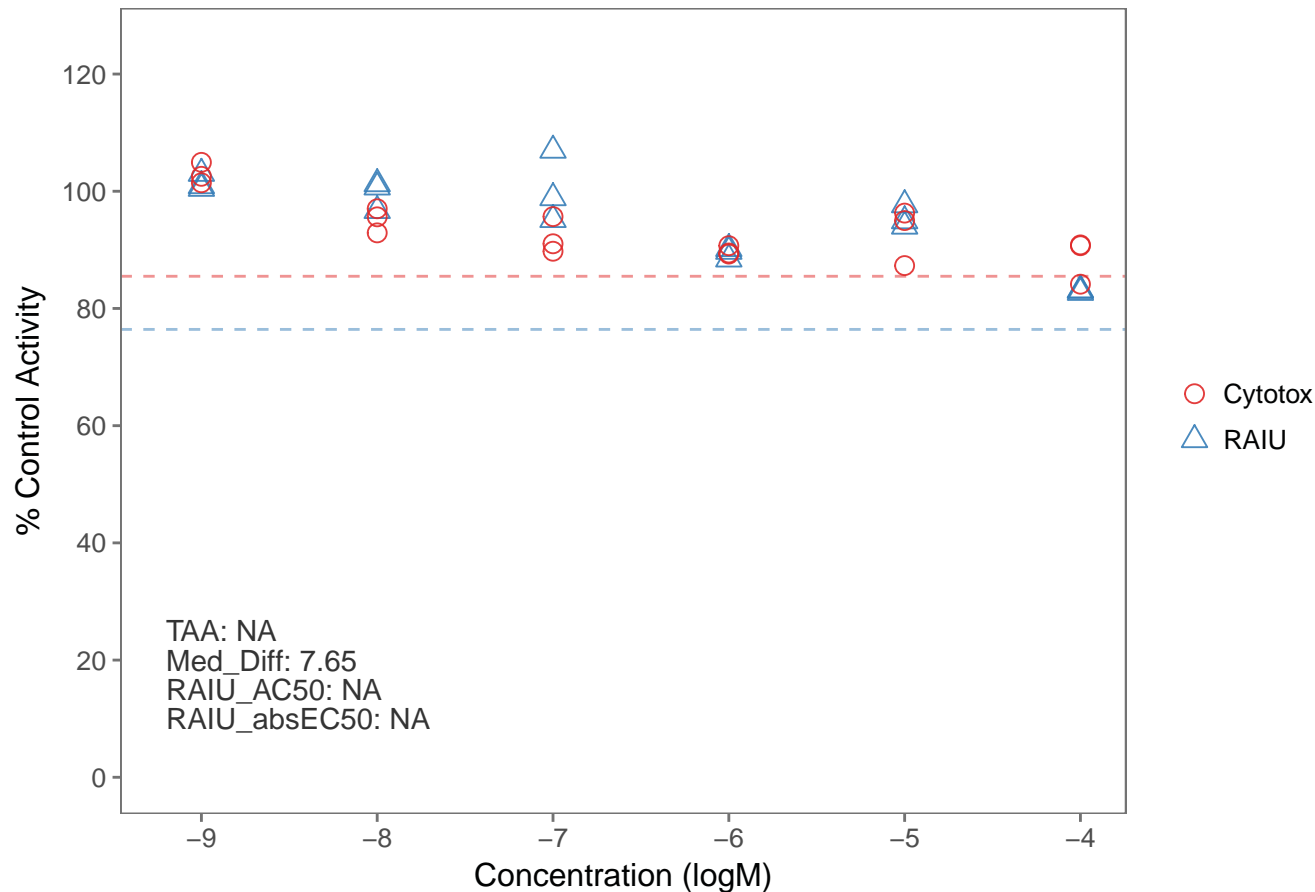

205. SPID: TP0001683G09

NAME: CP-456773

CAS NO: 210826-40-7

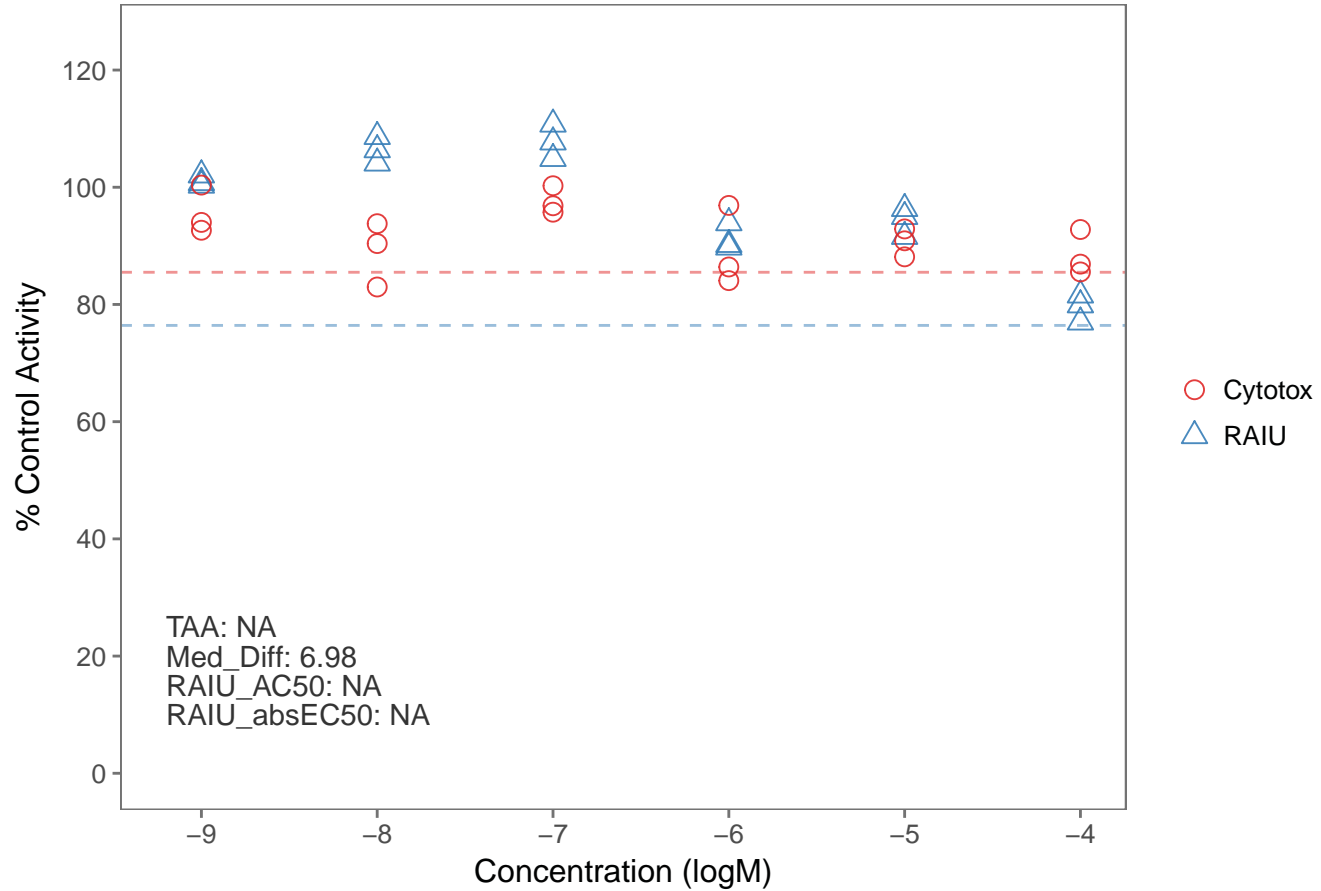

206. SPID: TP0001686B04

NAME: Carbamazepine

CAS NO: 298-46-4

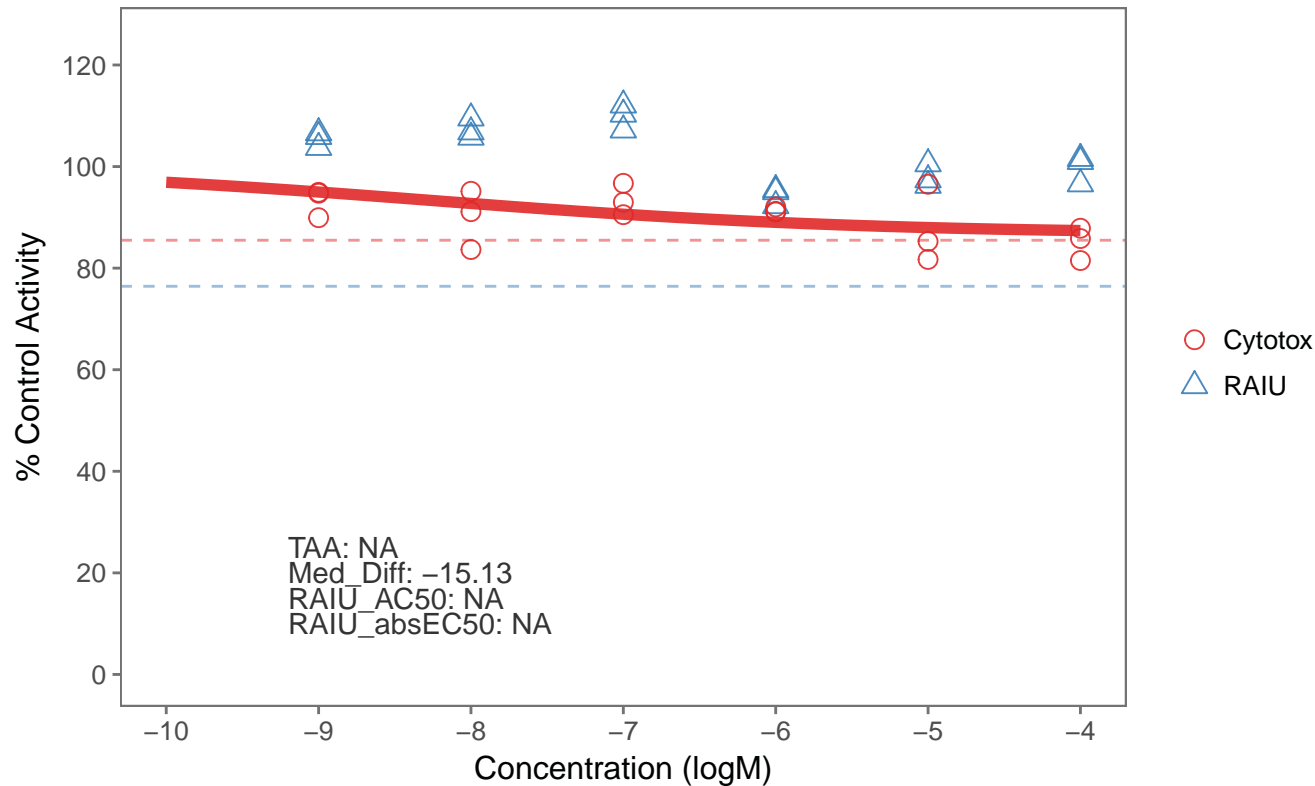

207. SPID: TP0001686D01

NAME: Tributyl phosphate

CAS NO: 126-73-8

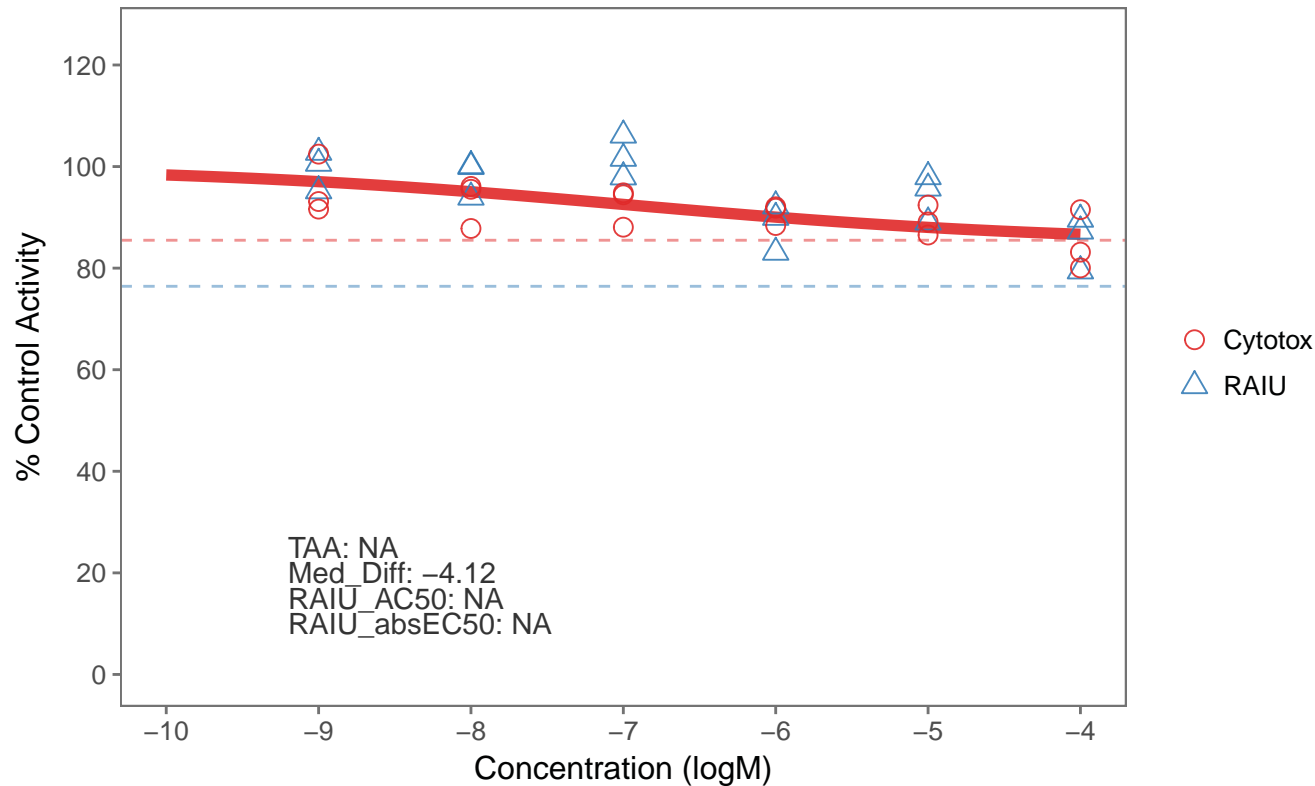

208. SPID: TP0001686E01  
NAME: 17alpha-Ethinylestradiol  
CAS NO: 57-63-6

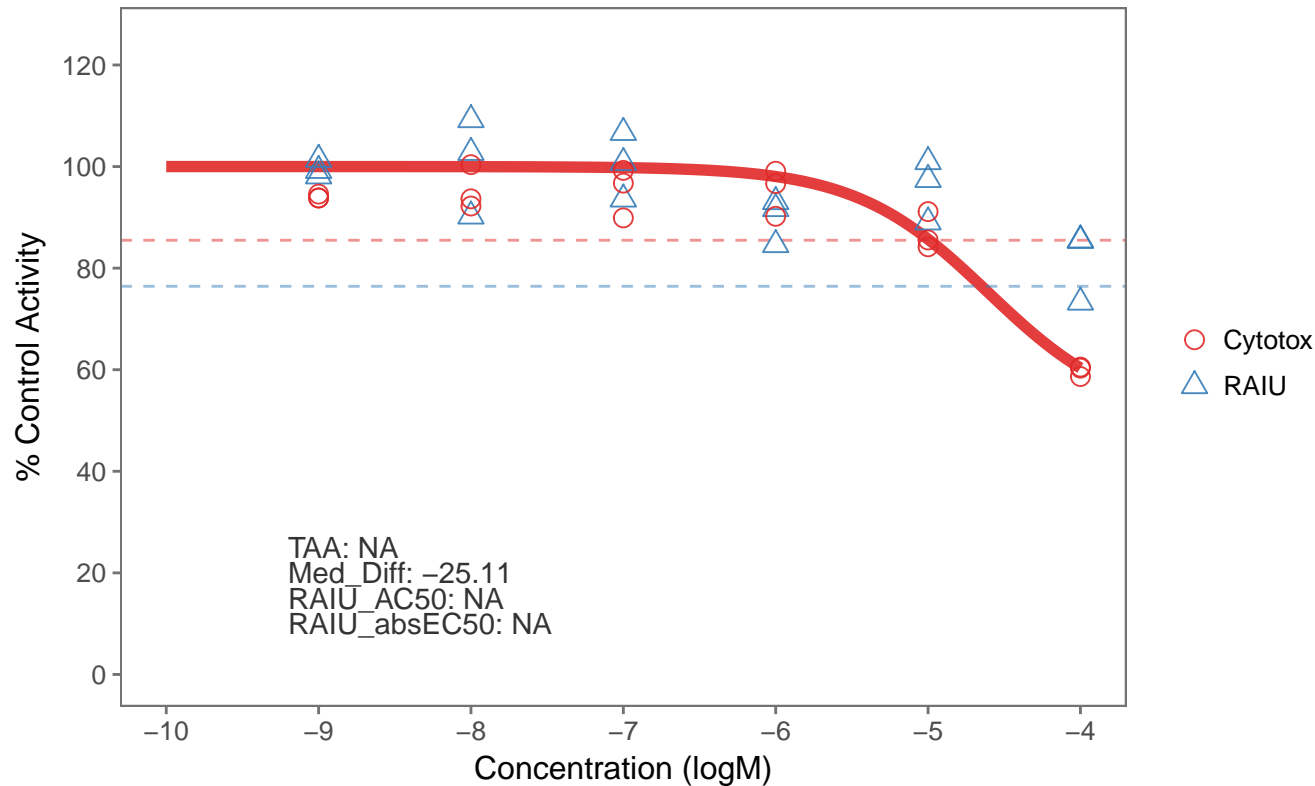



209. SPID: TP0001686F11

NAME: CP-612372

CAS NO: 353280-07-6

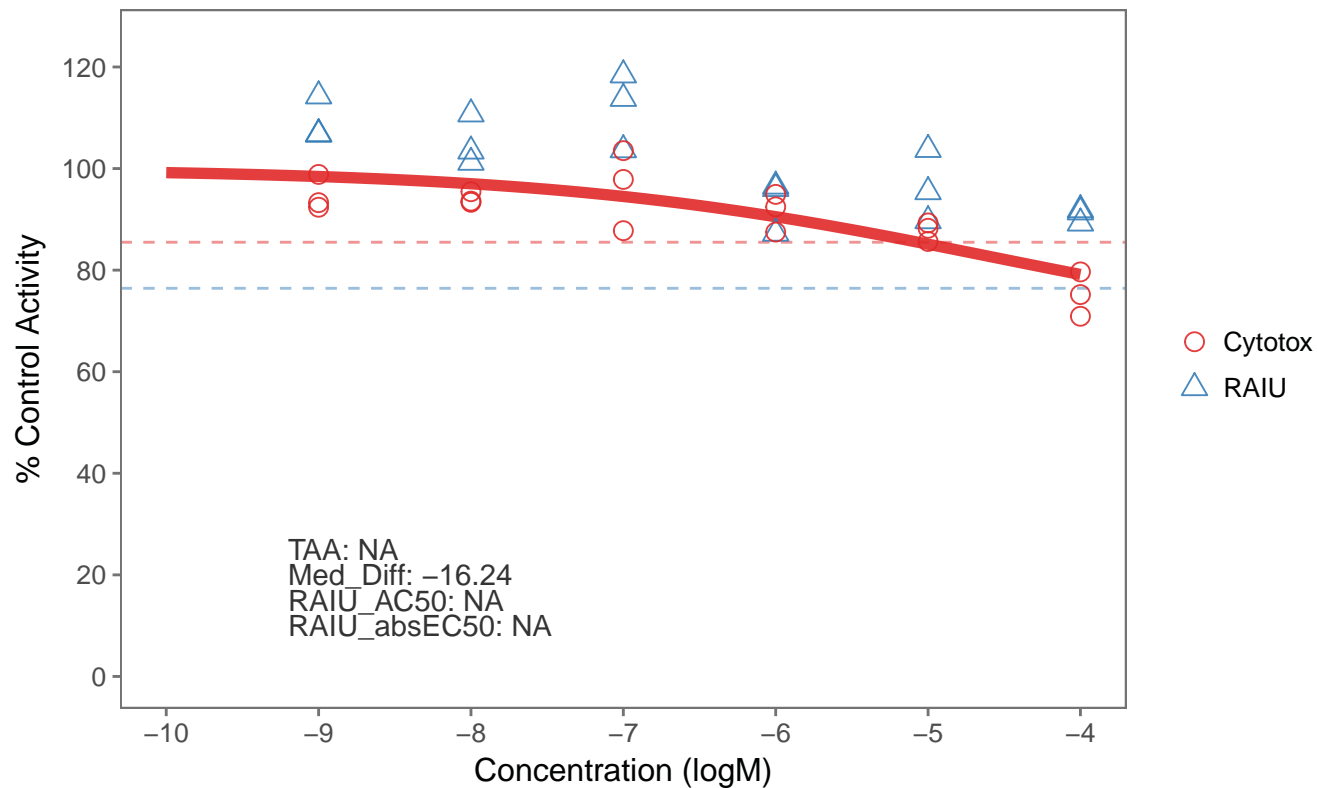

210. SPID: TP0001686G04

NAME: Tetrac

CAS NO: 67-30-1

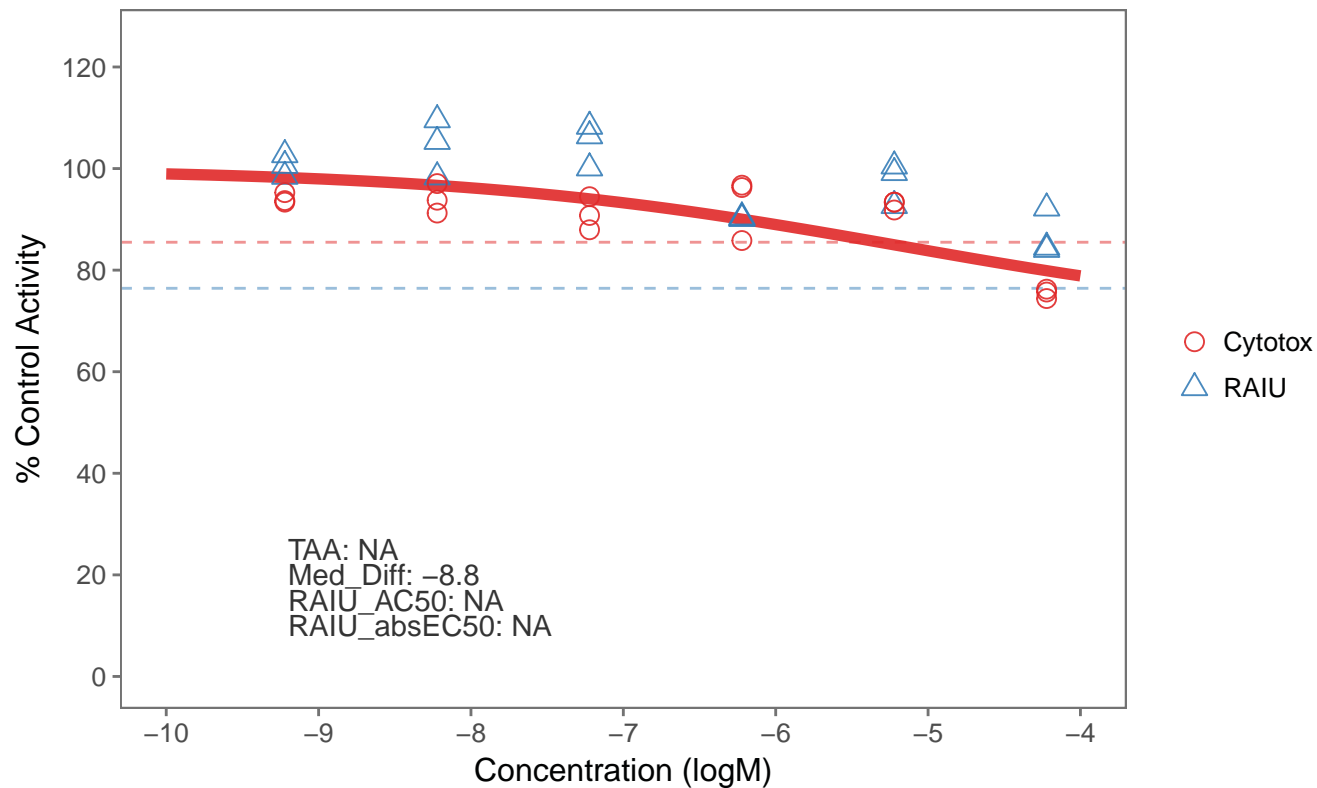

211. SPID: TP0001687B01  
NAME: 5-Chloro-2-methyl-3(2H)-isothiazolone  
CAS NO: 26172-55-4

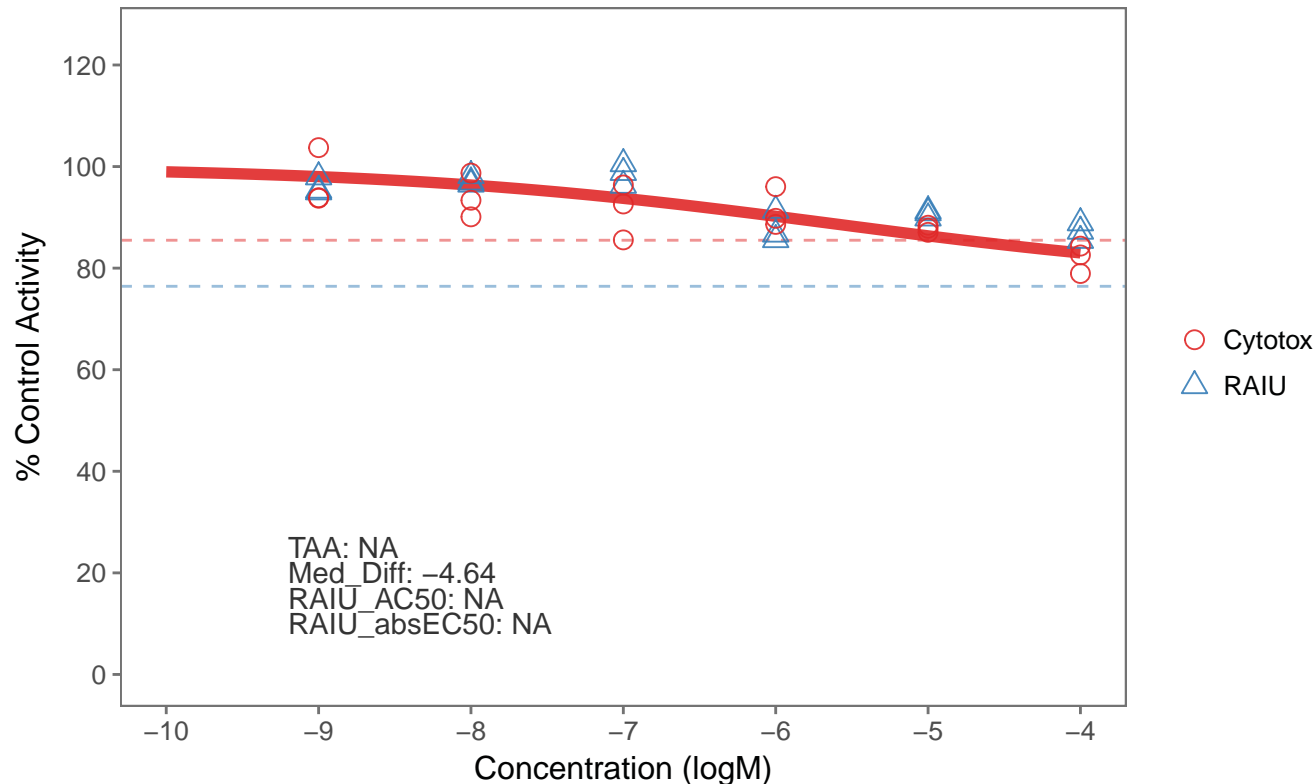

212. SPID: TP0001687E02  
NAME: 3,4-Dichloronitrobenzene  
CAS NO: 99-54-7

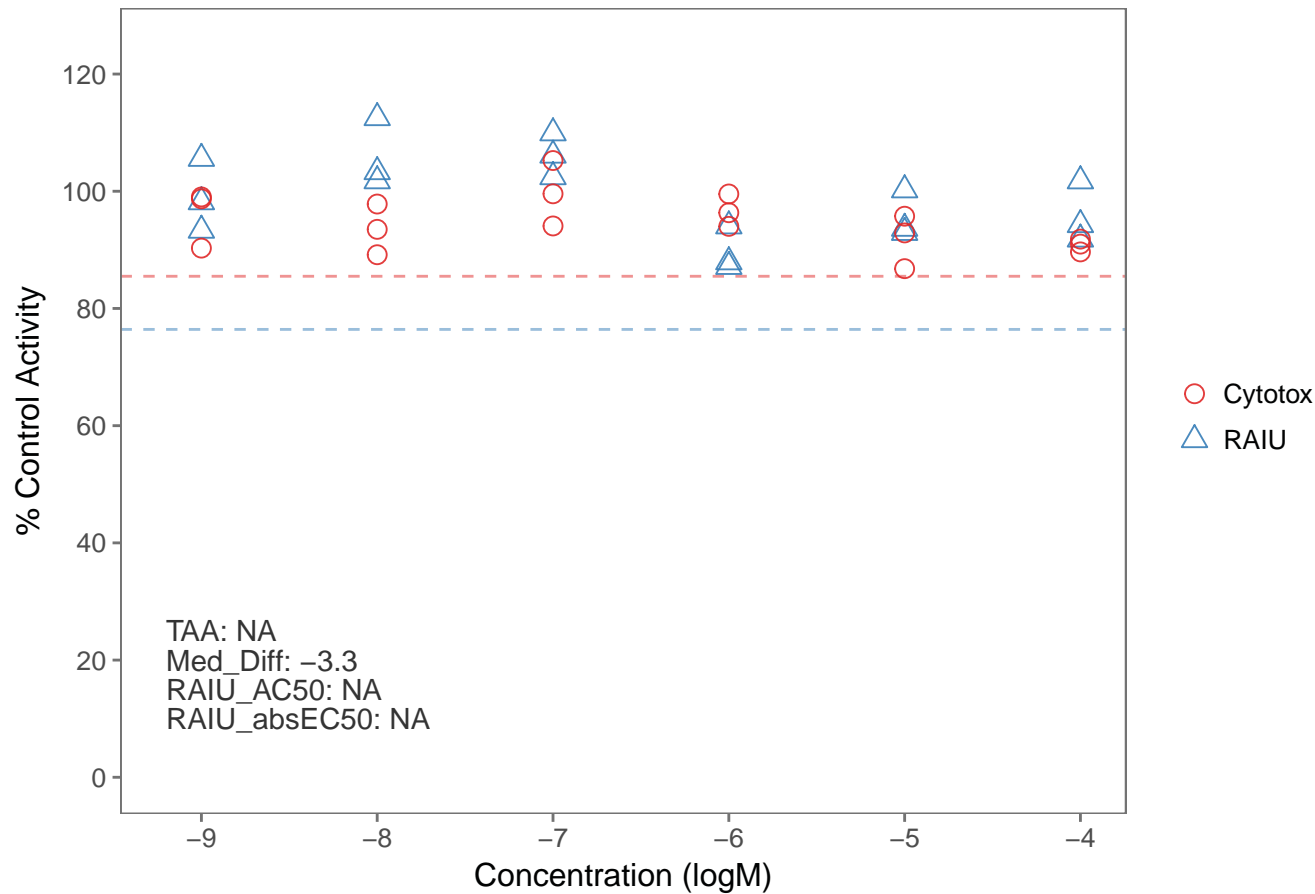

213. SPID: TP0001687E03

NAME: Kepone

CAS NO: 143-50-0

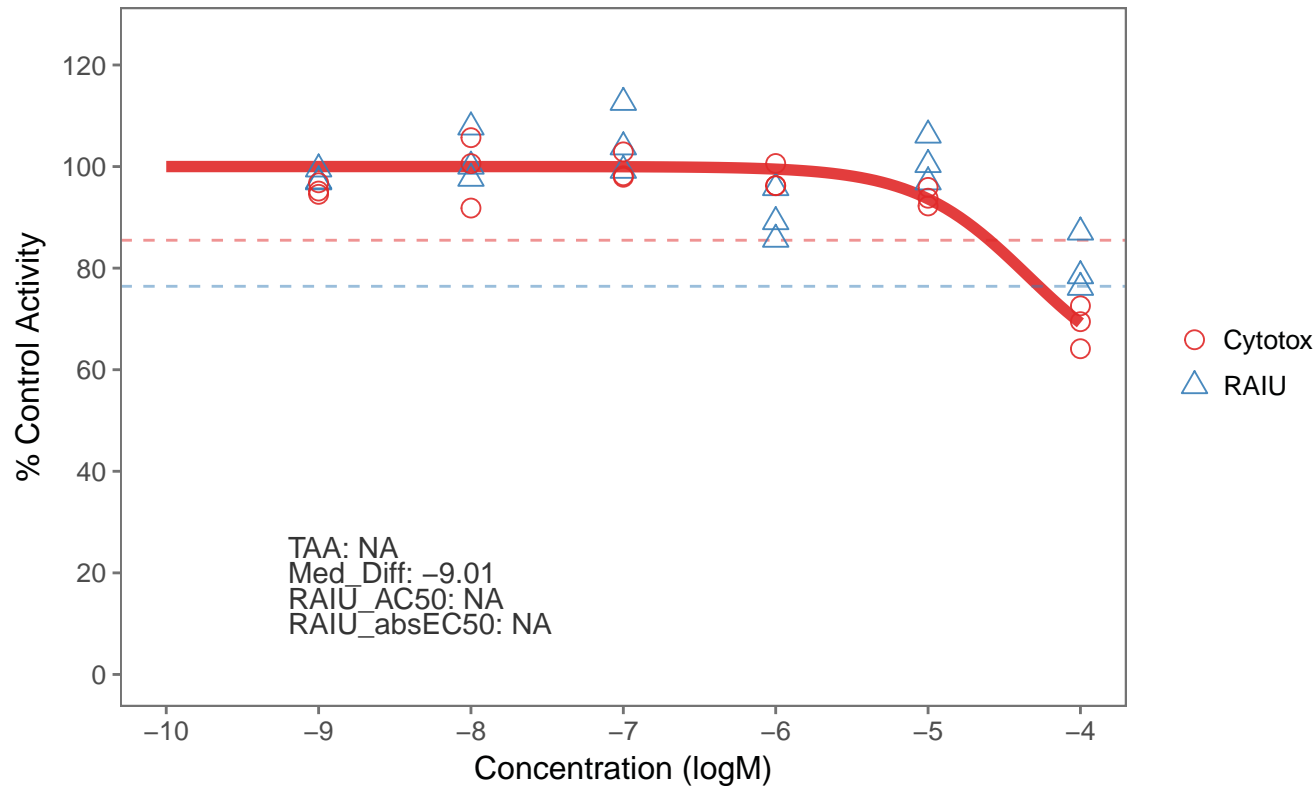

214. SPID: TP0001687G02  
NAME: 1,2,4-Trimethylbenzene  
CAS NO: 95-63-6

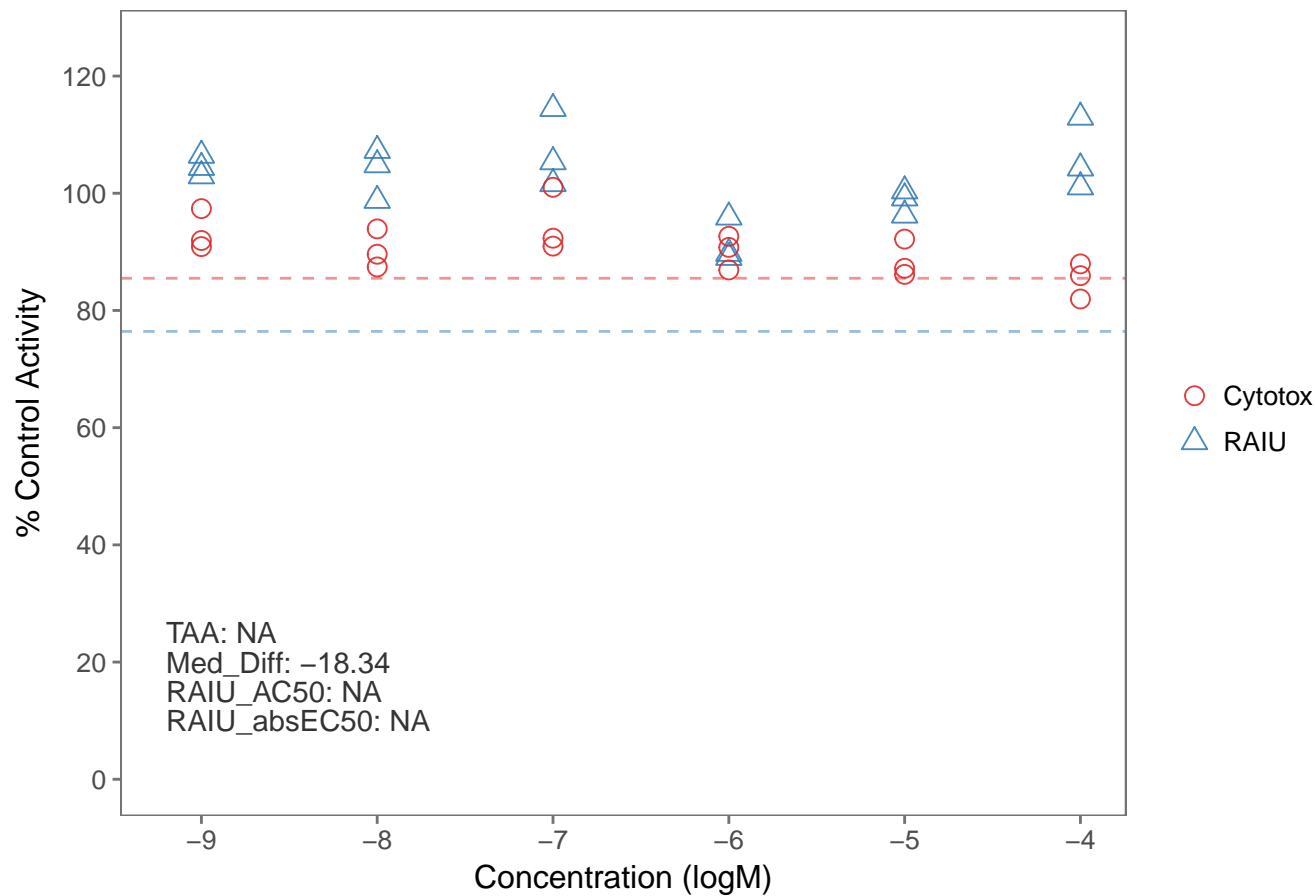

215. SPID: TP0001680C05  
NAME: PharmaGSID\_47259  
CAS NO: 149062-75-9

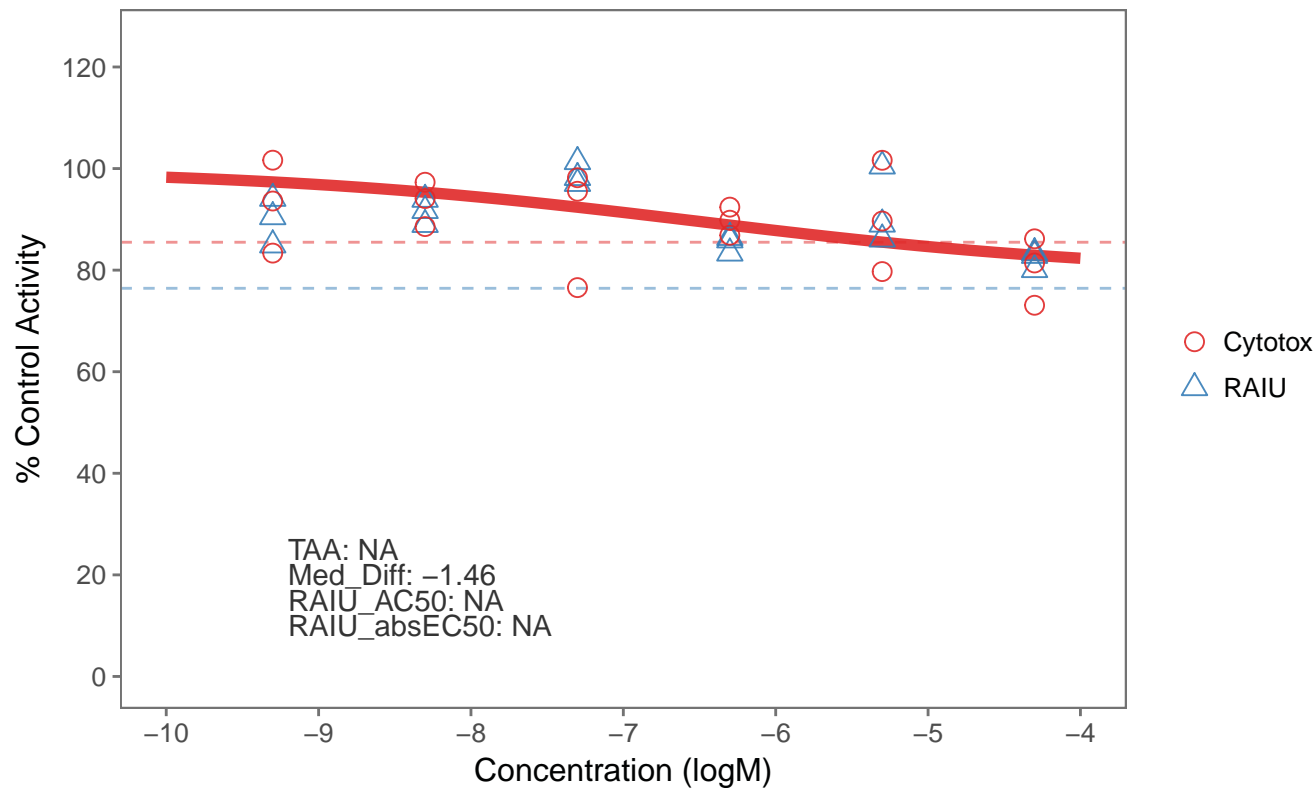

216. SPID: TP0001680G01  
NAME: 4-tert-Butylphenol  
CAS NO: 98-54-4

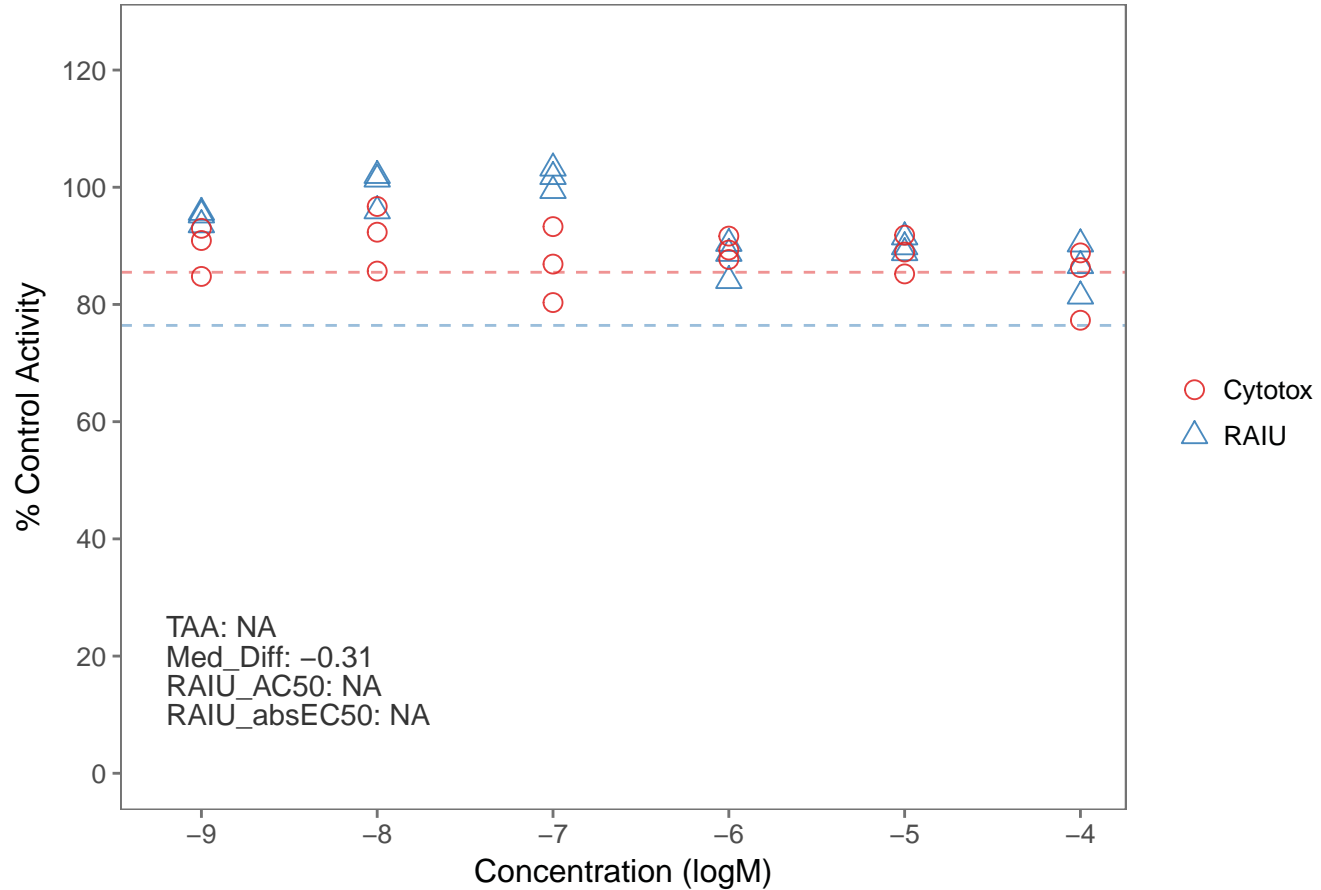



217. SPID: TP0001685C01  
NAME: Trelanserin  
CAS NO: 189003-92-7

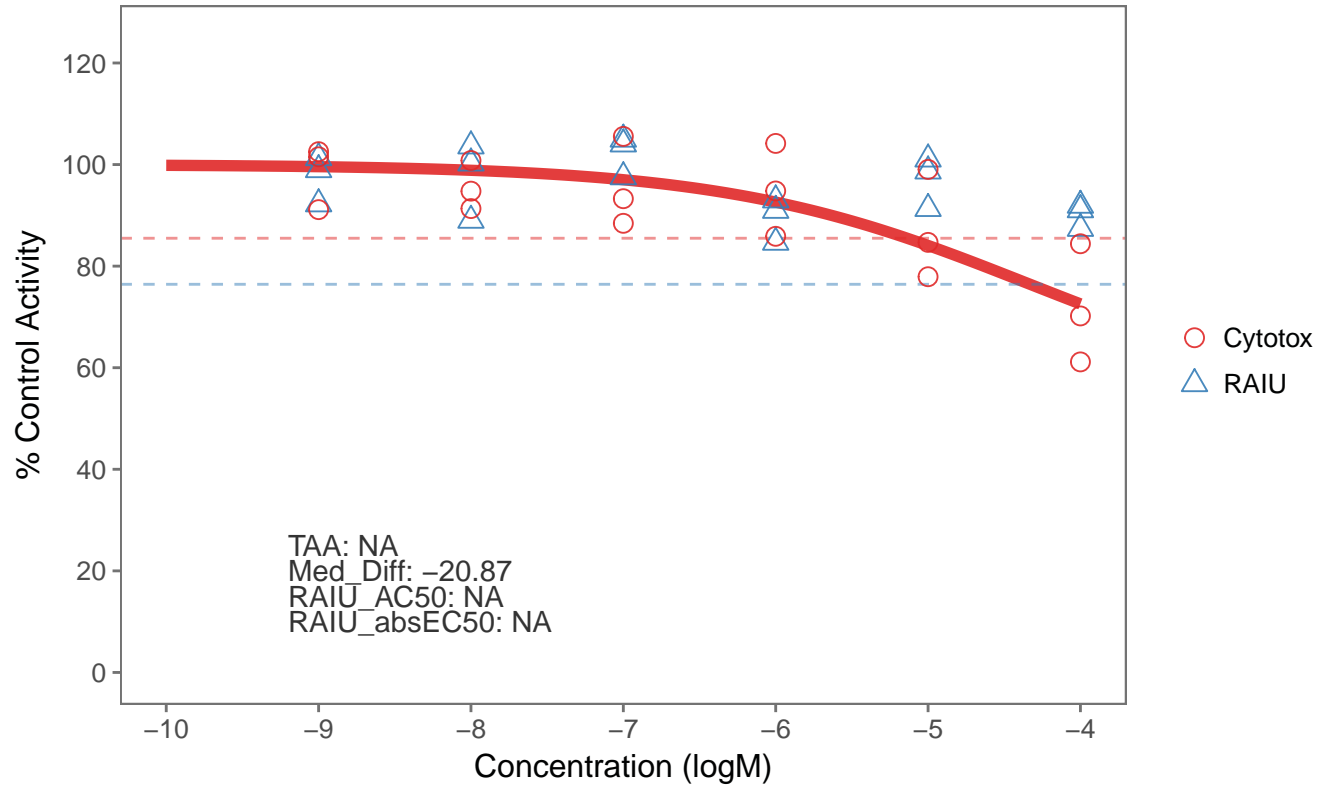

218. SPID: TP0001685C04  
NAME: PharmaGSID\_48507  
CAS NO: NOCAS\_48507

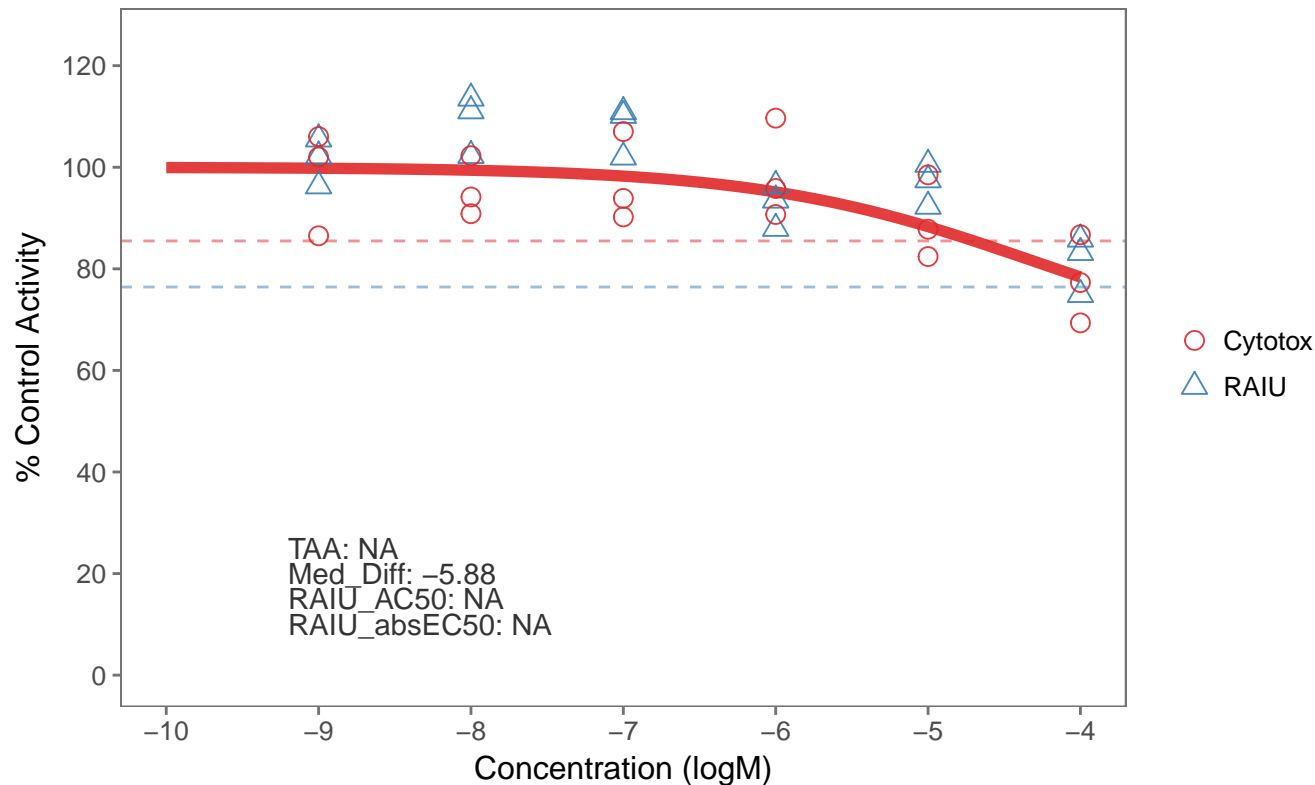

219. SPID: TP0001685C08

NAME: Disulfiram

CAS NO: 97-77-8

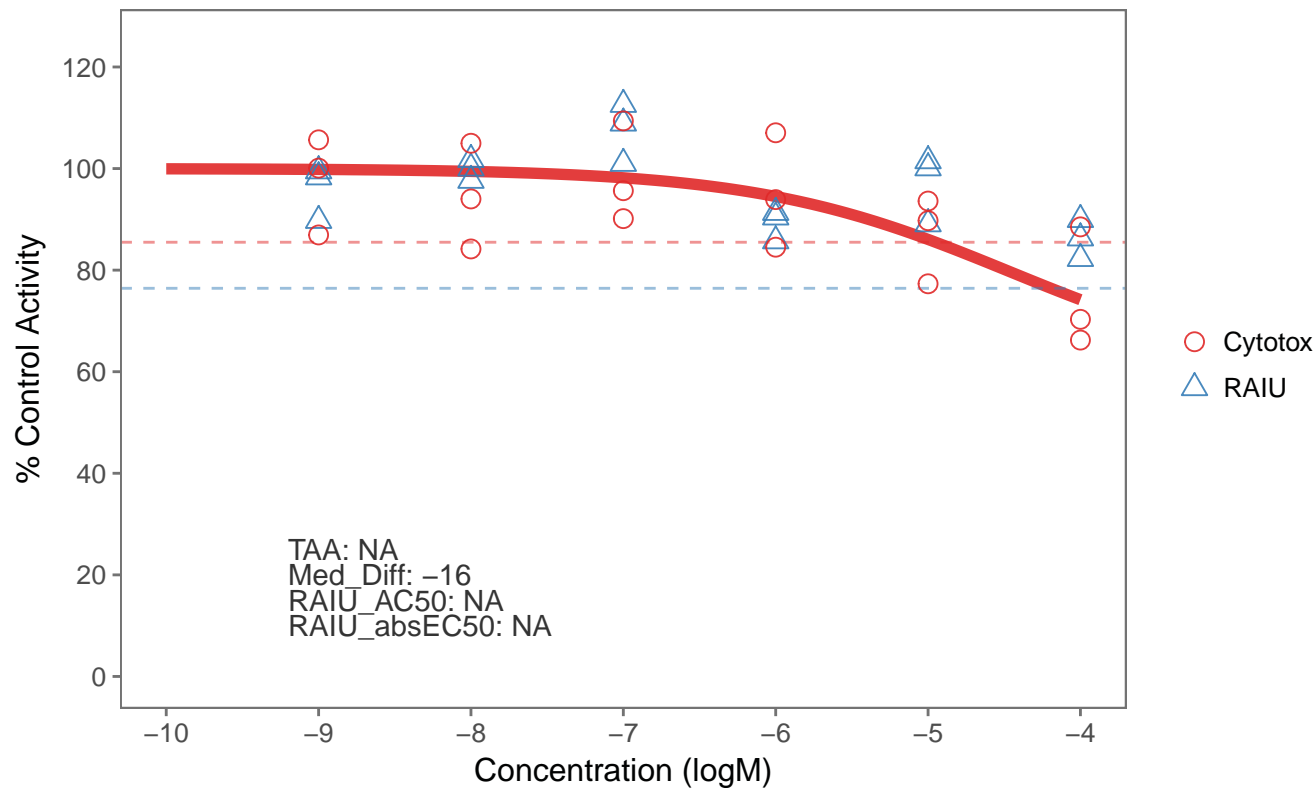

220. SPID: TP0001685D05  
NAME: 4-(2-Methylbutan-2-yl)phenol  
CAS NO: 80-46-6

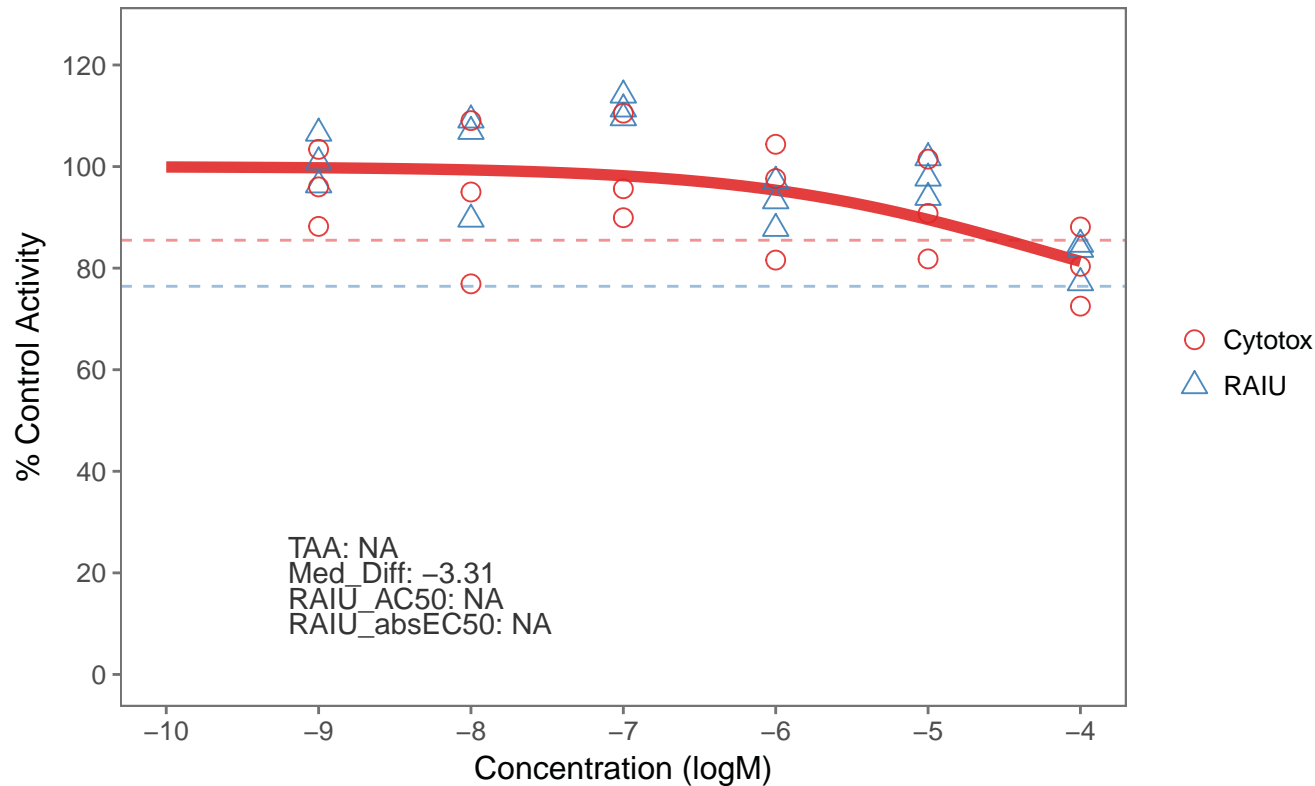

221. SPID: TP0001685D07  
NAME: PD-0333941  
CAS NO: 501027-49-2

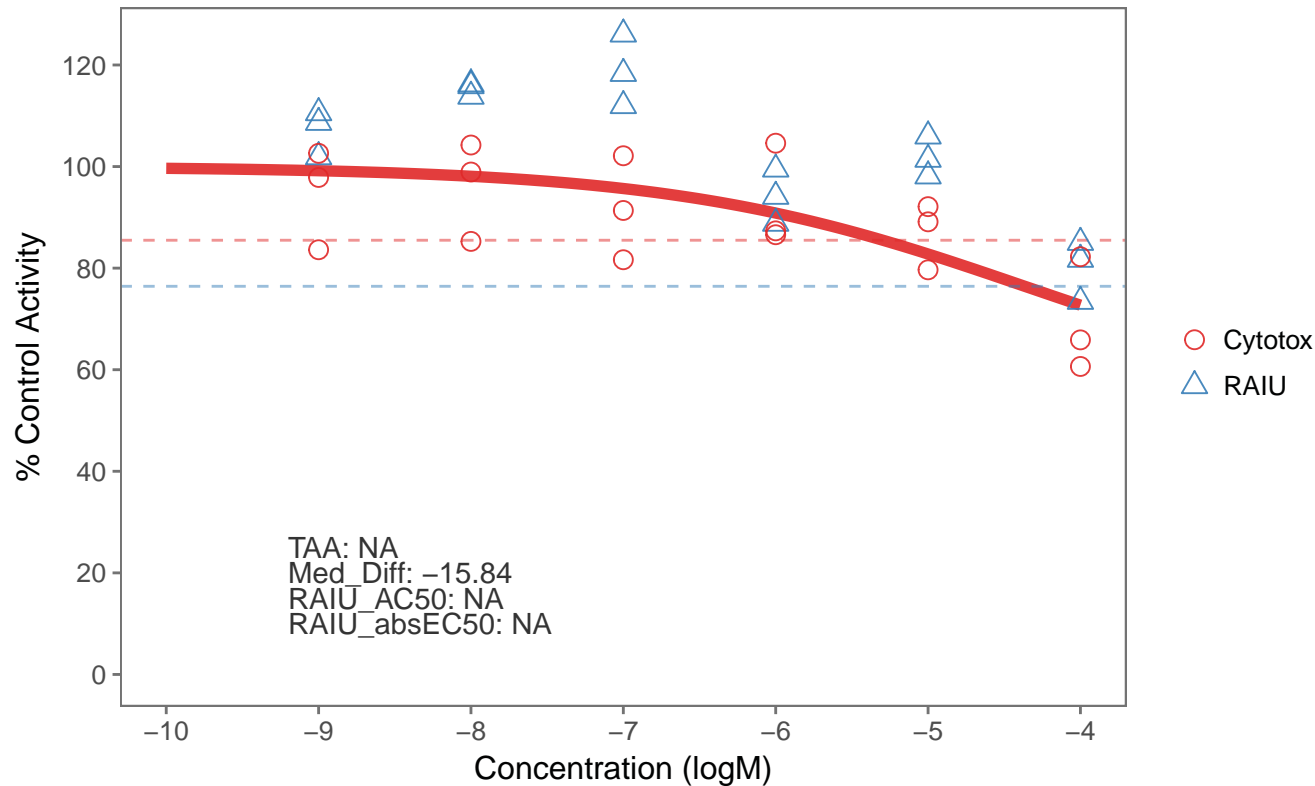

222. SPID: TP0001685E08

NAME: Haloperidol

CAS NO: 52-86-8

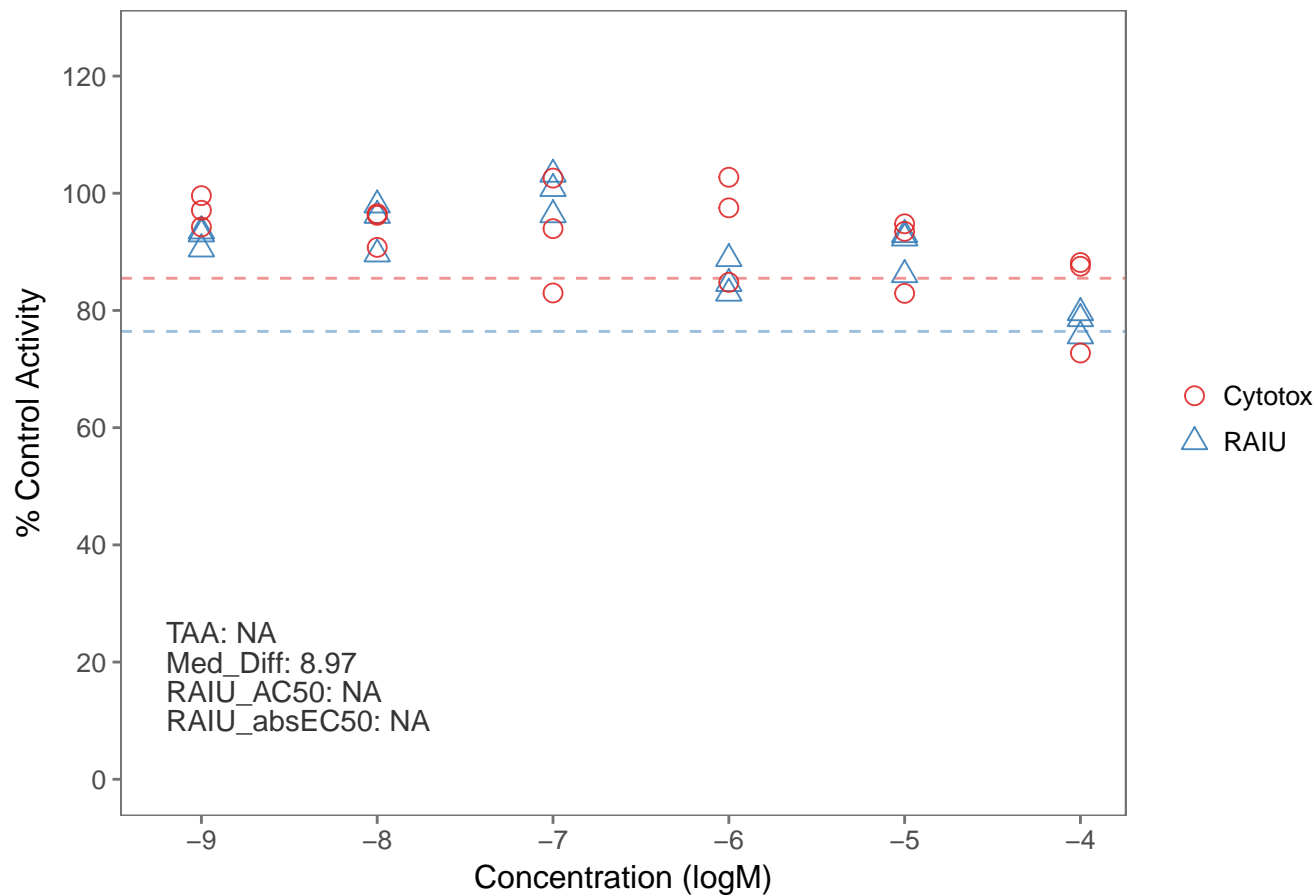

223. SPID: TP0001685F03  
NAME: Acetyl tributyl citrate  
CAS NO: 77-90-7

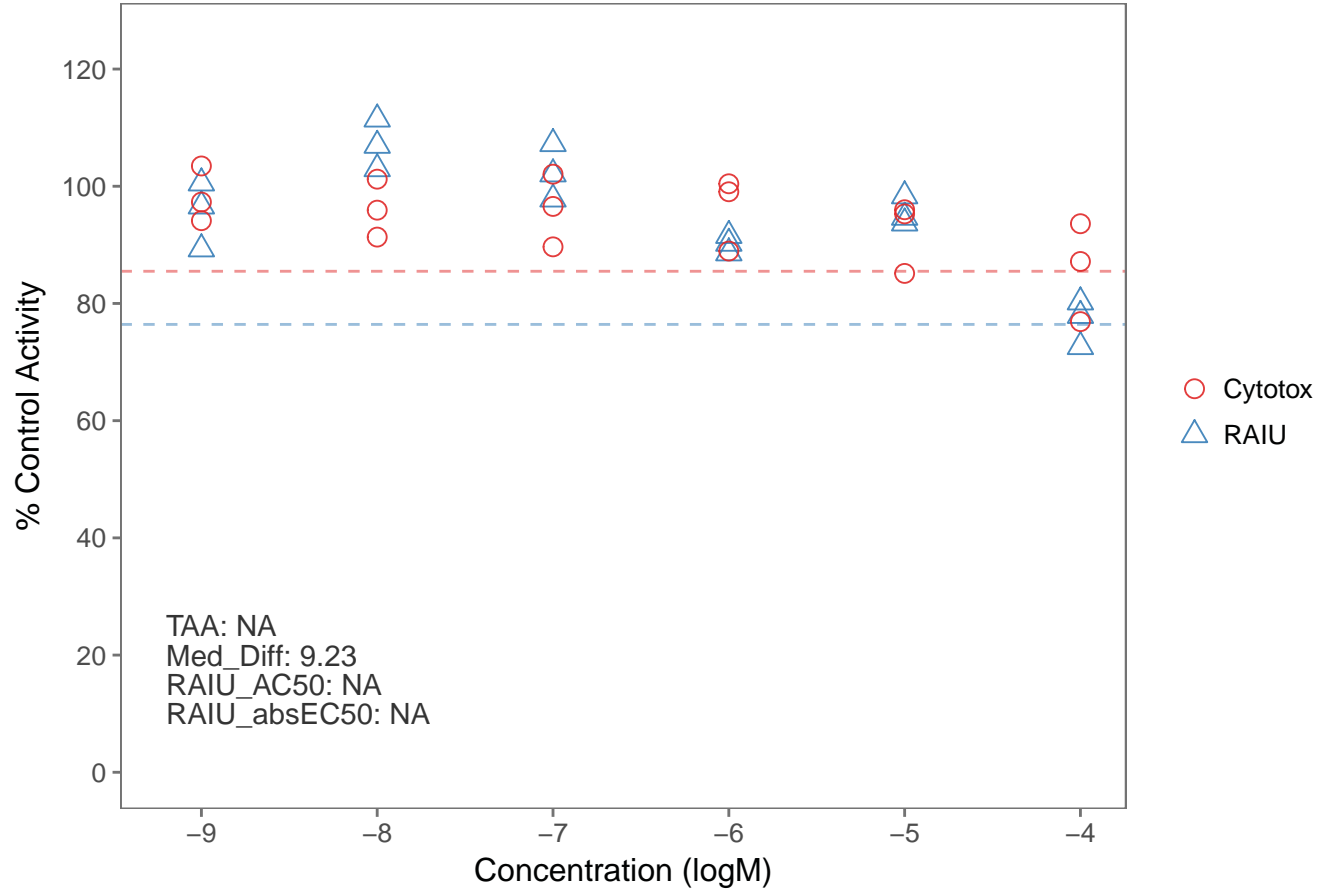

224. SPID: TP0001688C04  
NAME: Hydroxyflutamide  
CAS NO: 52806-53-8

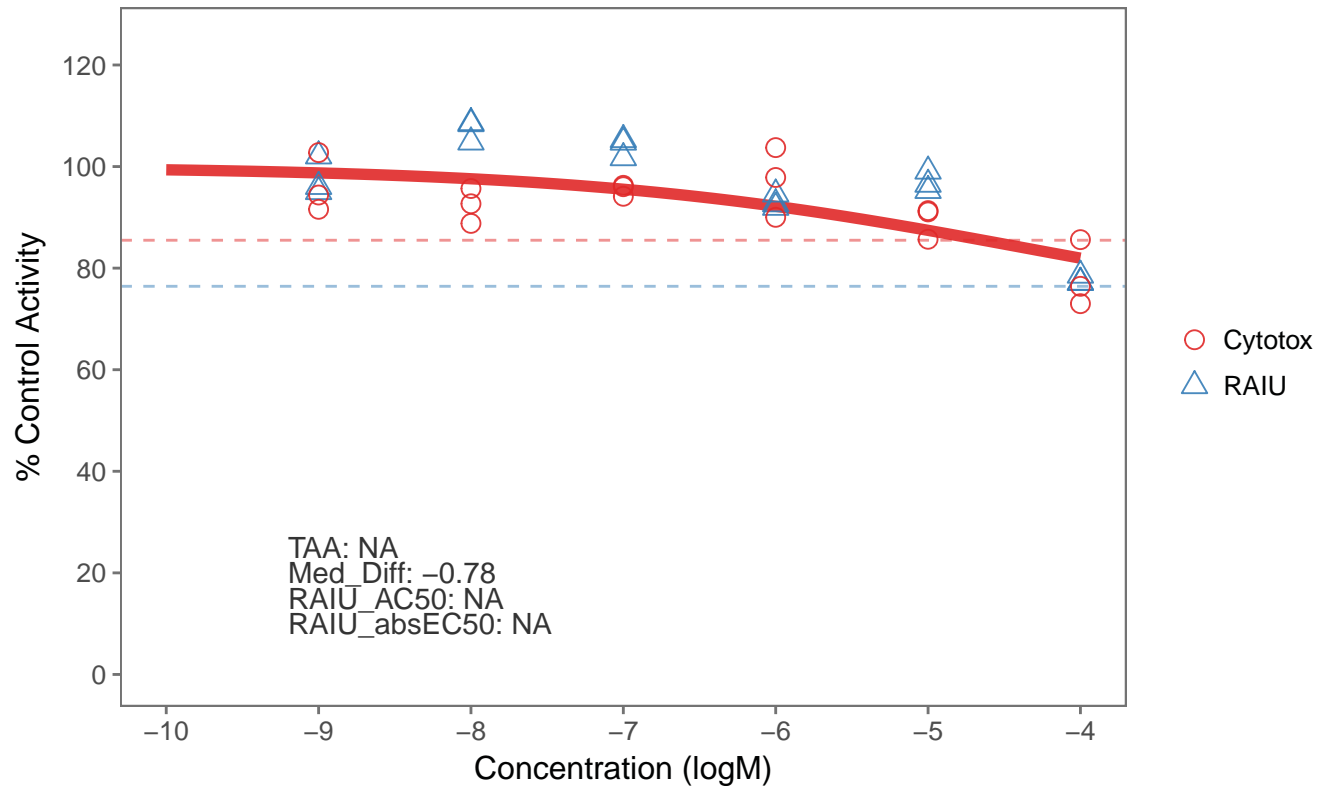



225. SPID: TP0001688D02

NAME: UK-416244

CAS NO: 402910-27-4

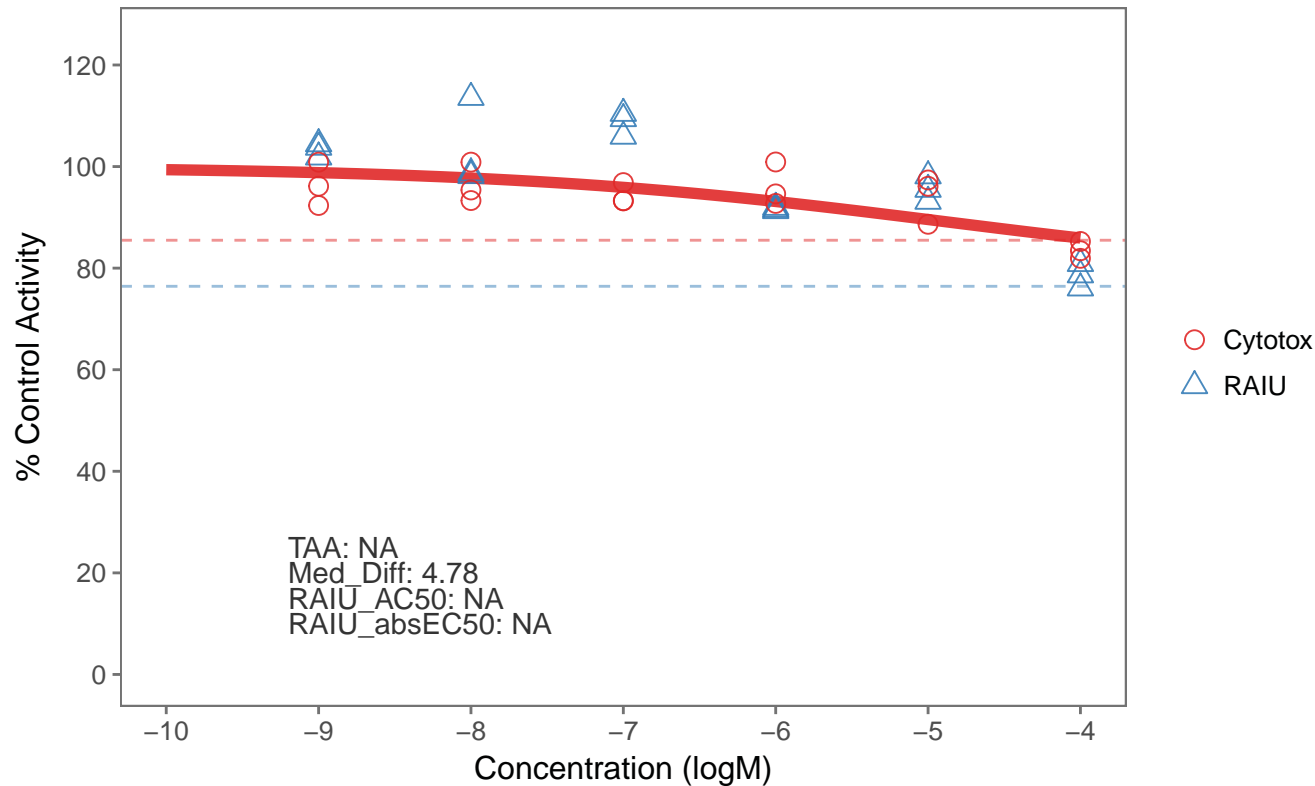

226. SPID: TP0001688E01  
NAME: PharmaGSID\_47261  
CAS NO: 177785-47-6

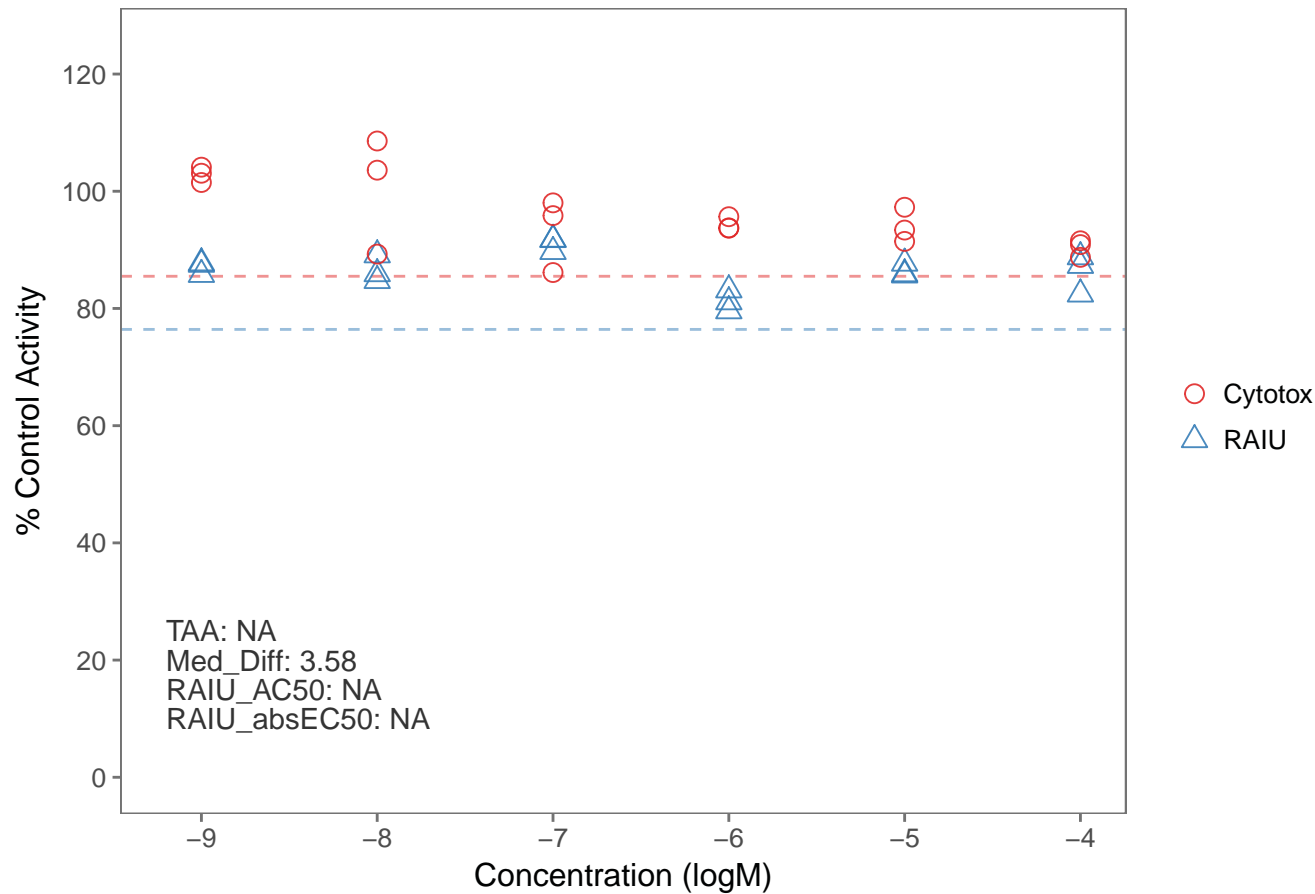

227. SPID: TP0001688E09  
NAME: 2-Methyl-5-nitroaniline  
CAS NO: 99-55-8

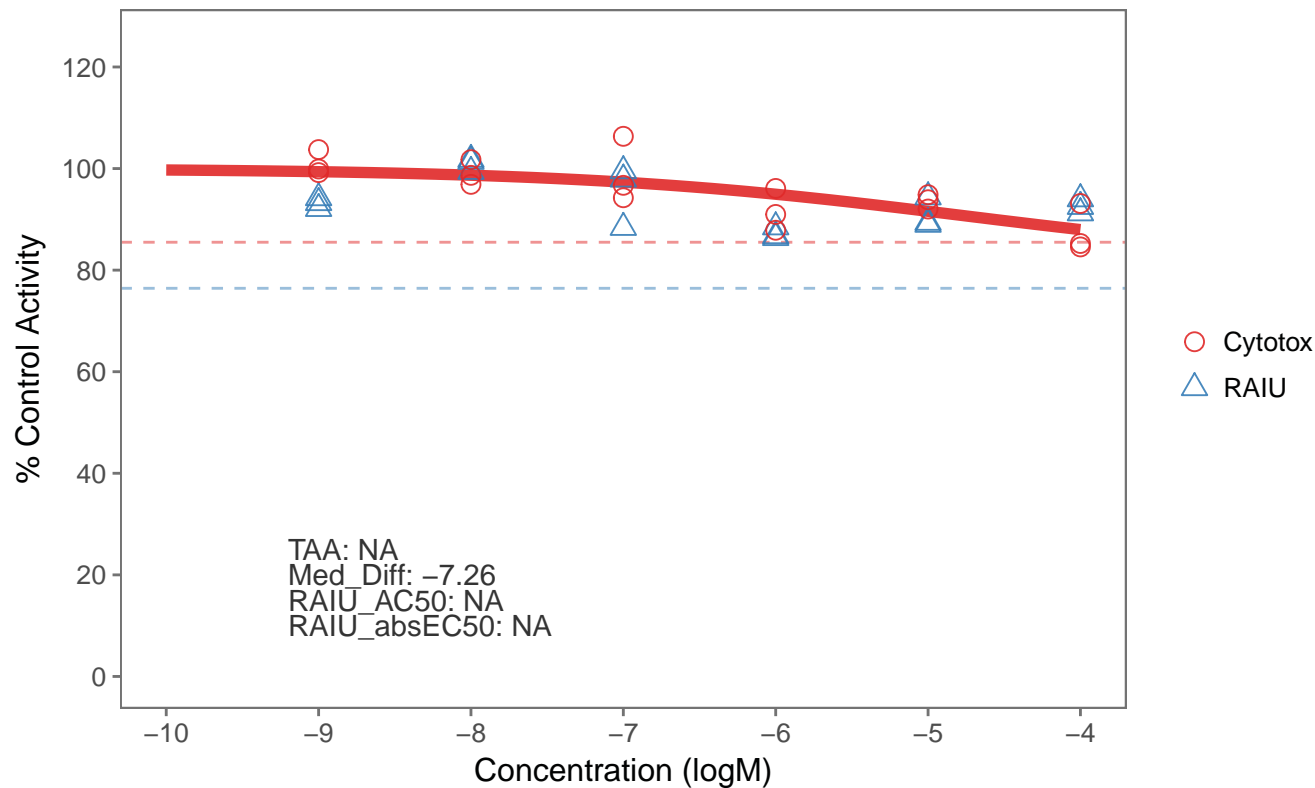

228. SPID: TP0001688F04

NAME: Butylparaben

CAS NO: 94-26-8

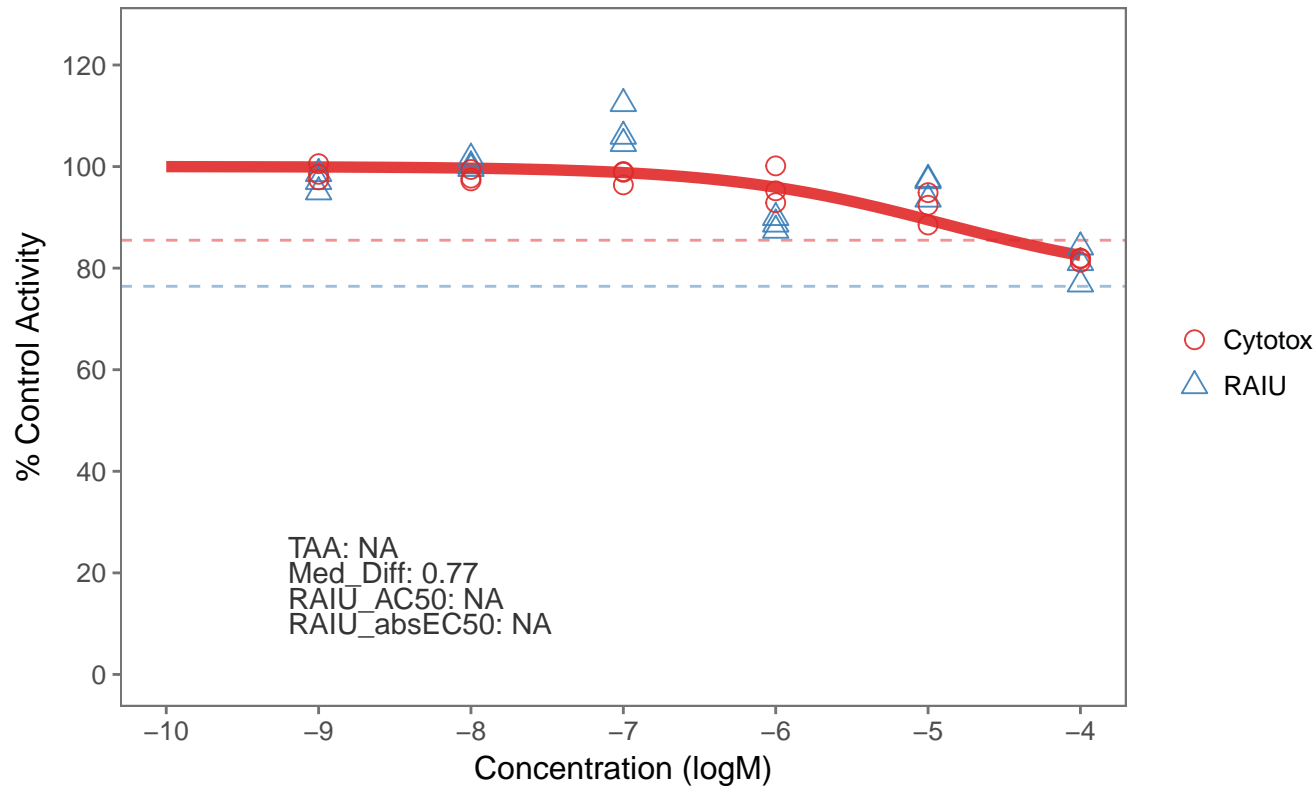

229. SPID: TP0001689D01

NAME: Inglistorib

CAS NO: 186392-65-4

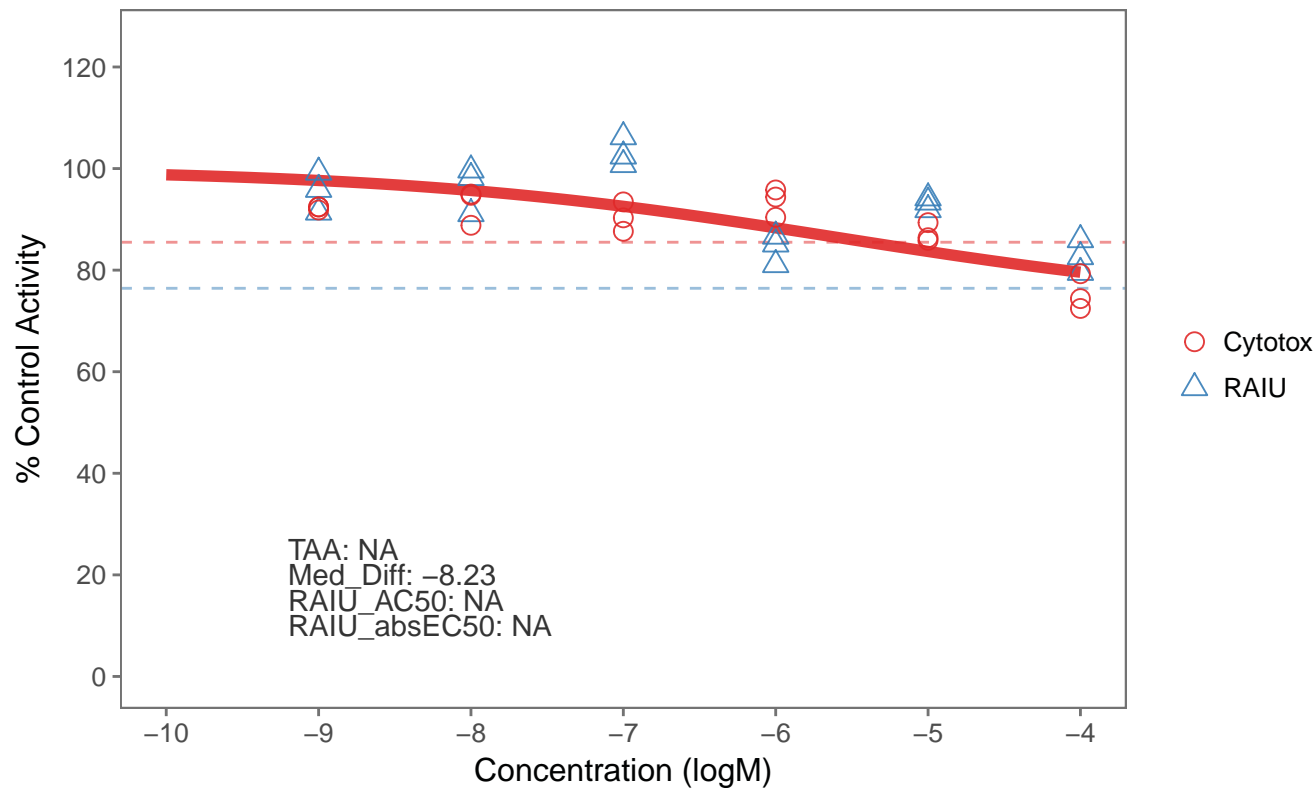

230. SPID: TP0001689E01

NAME: Pentaerythritol

CAS NO: 115-77-5

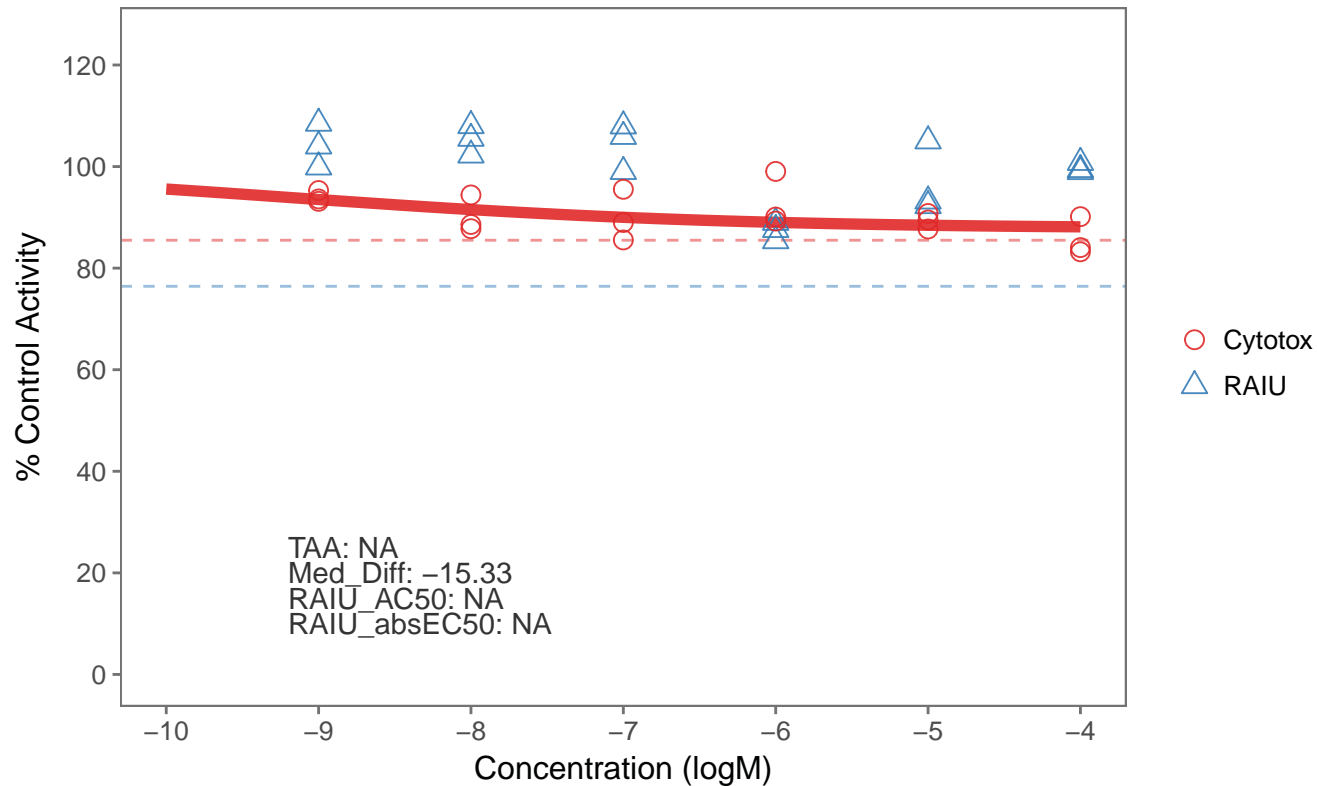

231. SPID: TP0001689E02  
NAME: Aplaviroc hydrochloride  
CAS NO: 461023-63-2

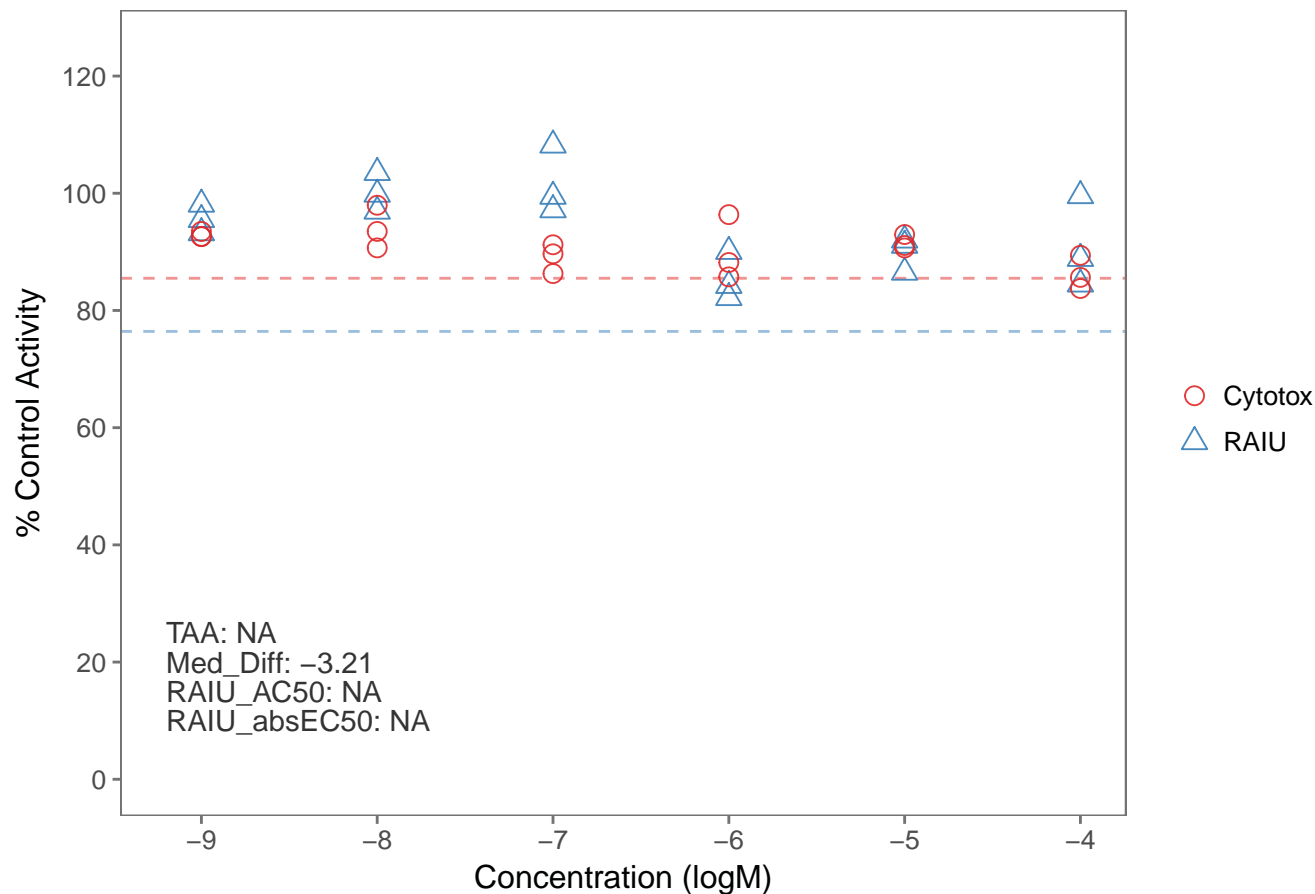

232. SPID: TP0001678B05

NAME: CP-122721

CAS NO: 145742-28-5

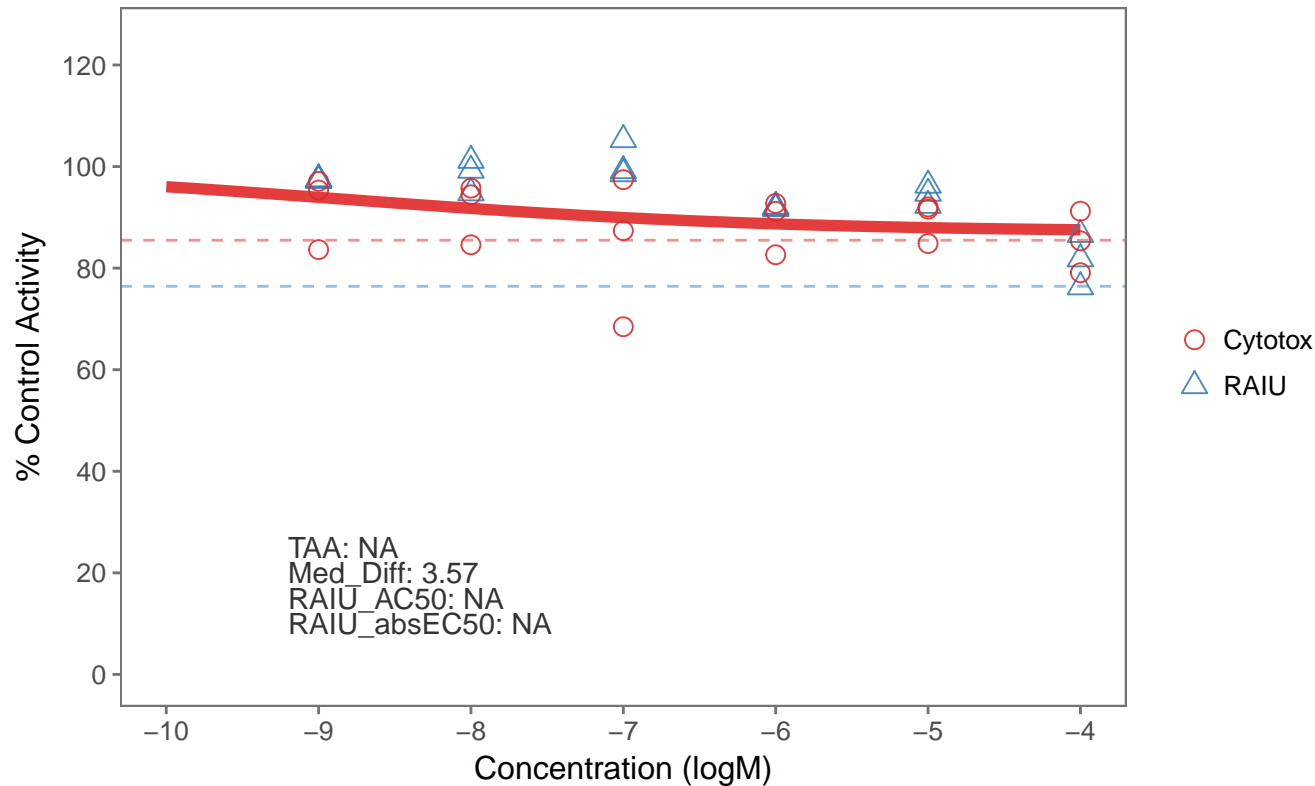



233. SPID: TP0001678B11

NAME: Pyrimethamine

CAS NO: 58-14-0

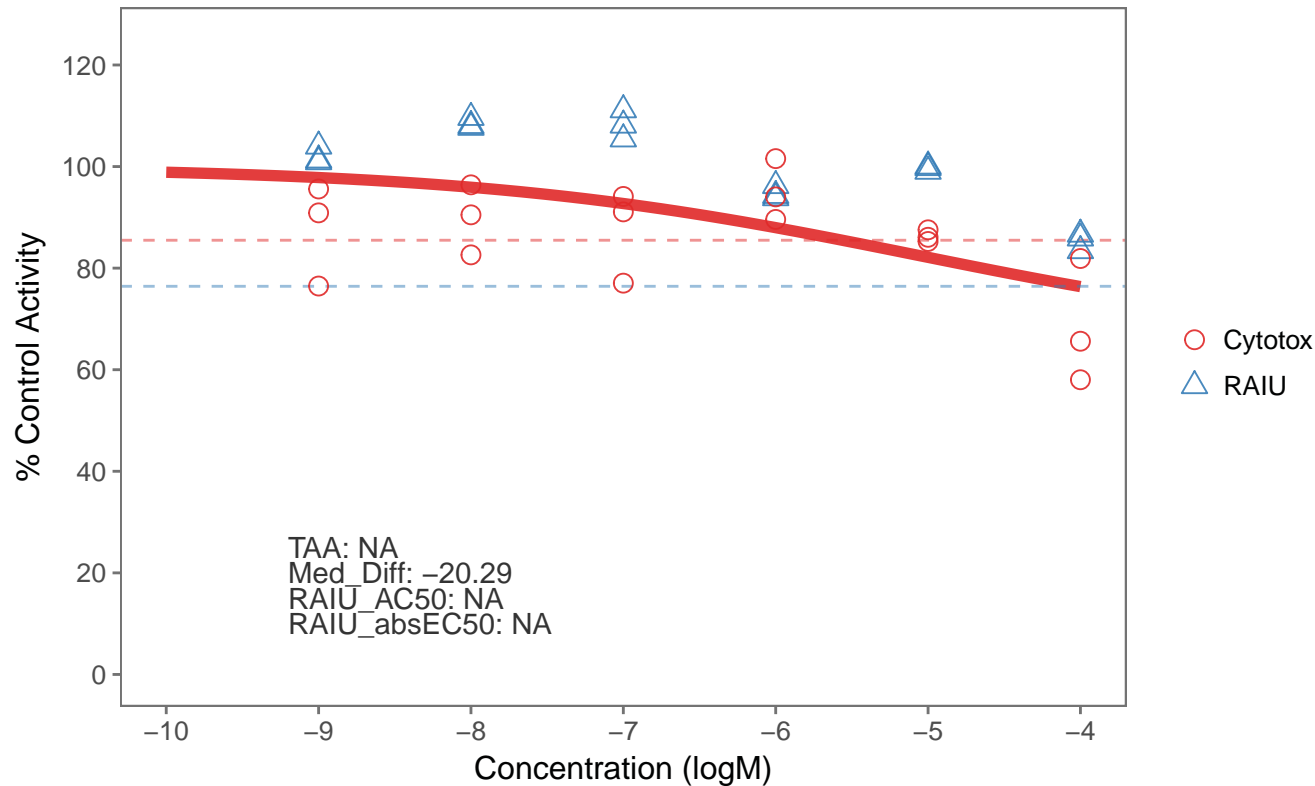

234. SPID: TP0001678C03  
NAME: Bronopol  
CAS NO: 52-51-7

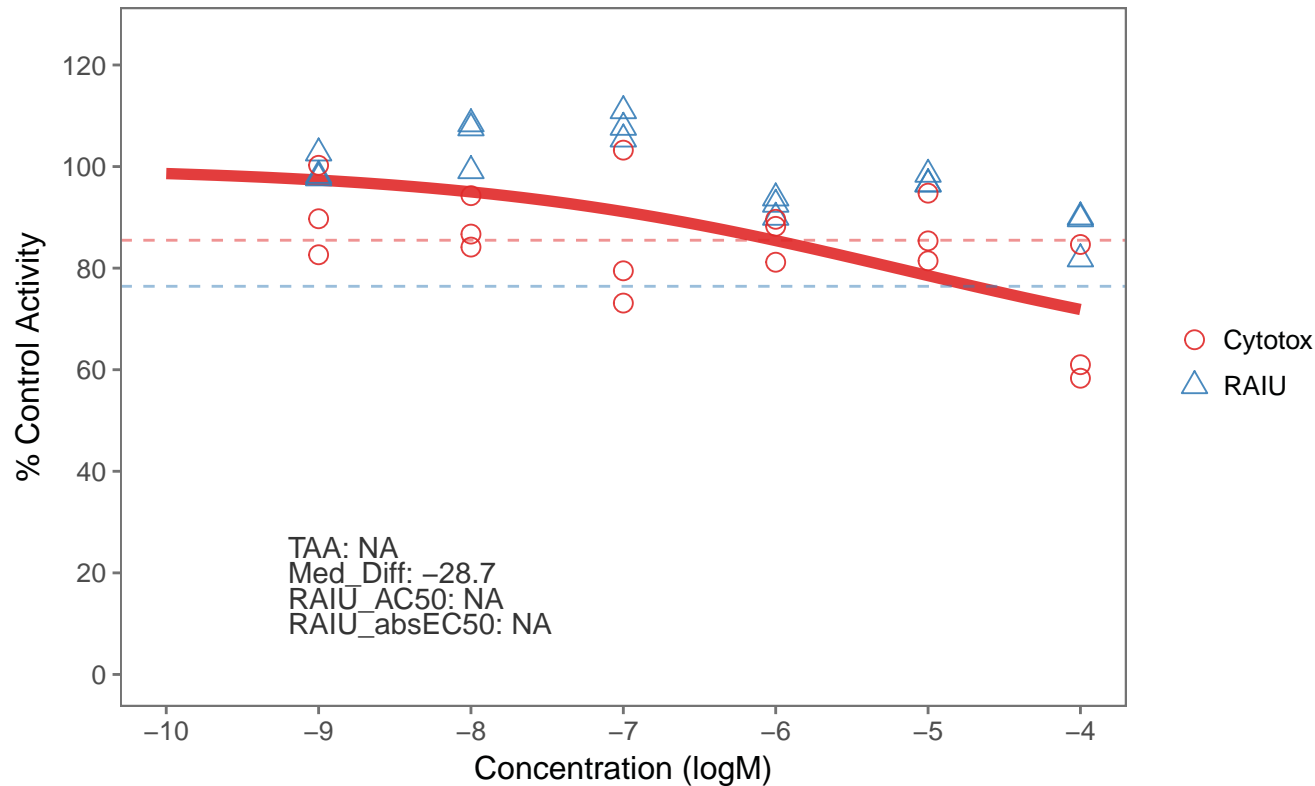

235. SPID: TP0001678E01

NAME: 1-Hydroxypyrene

CAS NO: 5315-79-7

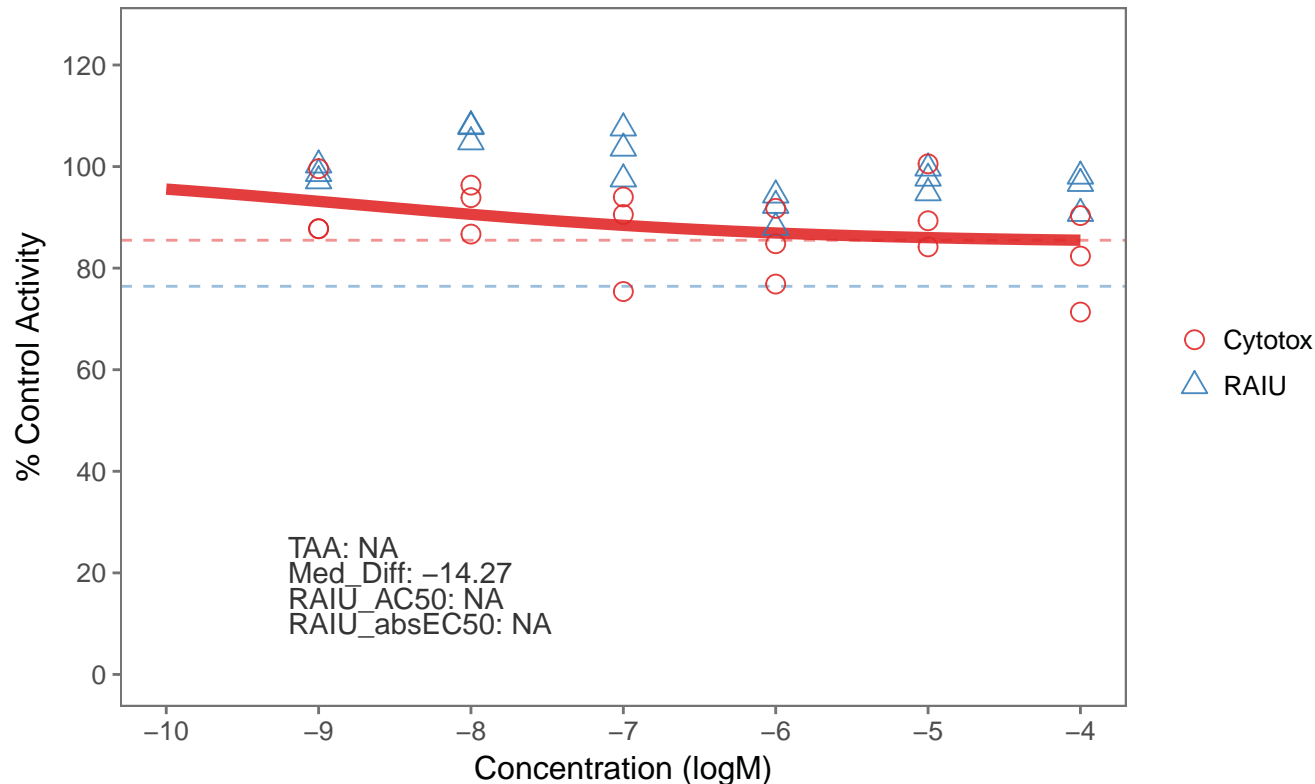

Supplement: NIHMS1798946-supplement-Figure_S4.pdf [file NIHMS1798946-supplement-Figure_S4.pdf]
